# Supplementary material for: Oceanic adults, coastal juveniles: tracking the habitat use of whale sharks off the Pacific coast of Mexico
Source: PeerJ. 2017 May 4;5:e3271. doi: 10.7717/peerj.3271 (PMC5420197; doi:10.7717/peerj.3271)
Supplement: Data S1 — Archived depth, temperature, and latitude and longitude data from original data reports from tags WS1 to WS8 received from Microwave Telemetry [file peerj-05-3271-s004.xlsx]

## Sheet: WS1
Archival Data							Archival Data							Latitude and Longitude for Tag 88692
Date/Time	Press(val)	Depth(m)	Delta(val)	Δ Lim Dives	Δ Lim Ascents		Date/Time	Temp(val)	Temp(C)	Delta(val)	Δ Lim Inc Temp	Δ Lim Dec Temp		Date	Lat (N)	Long (W)		Lat (Avg)	Long (Avg)
2008-11-19 16:00:00	17	-5.37948	0				2008-11-19 16:00:00	174	24.2528	0				2008-11-19
2008-11-19 16:15:00	16	0	-1				2008-11-19 16:15:00	174	24.2528	0				2008-11-20	28.9771	111.206		25.7345	110.931		Start Point
2008-11-19 16:30:00	16	0	-1				2008-11-19 16:30:00	176	24.601	2				2008-11-21	23.7402	110.515		25.6009	110.98		2008-11-19
2008-11-19 16:45:00	16	0	-1				2008-11-19 16:45:00	198	28.5738	24				2008-11-22	24.4861	111.072		25.5969	111.094		Lat (N)	Long (W)
2008-11-19 17:00:00	17	-5.37948	0				2008-11-19 17:00:00	205	29.8995	31	29.8995			2008-11-23	25.2002	111.125		24.9955	111.098		24.115	110.34
2008-11-19 17:15:00	16	0	0				2008-11-19 17:15:00	205	29.8995	31	29.8995			2008-11-24	25.5811	111.551		25.6398	111.174
2008-11-19 17:30:00	16	0	0				2008-11-19 17:30:00	207	30.2844	31	30.2844			2008-11-25	25.9698	111.225		25.7207	111.222
2008-11-19 17:45:00	16	0	0				2008-11-19 17:45:00	225	33.88	27				2008-11-26	26.9617	110.895		25.5557	111.067		End Point
2008-11-19 18:00:00	16	0	X				2008-11-19 18:00:00	235	35.9894	X				2008-11-27	24.8907	111.313		26.2825	110.936		2008-12-13 22:23:04
2008-11-19 18:15:00	16	0	X				2008-11-19 18:15:00	212	31.2588	X				2008-11-28	24.375	110.353		25.9492	110.701		Lat (N)	Long (W)
2008-11-19 18:30:00	16	0	X				2008-11-19 18:30:00	200	28.9493	X				2008-11-29	29.2151	110.892		25.6207	110.864		24.191	110.462
2008-11-19 18:45:00	16	0	X				2008-11-19 18:45:00	200	28.9493	X				2008-11-30	24.3036	110.052		25.6715	110.925
2008-11-19 19:00:00	16	0	0				2008-11-19 19:00:00	203	29.5174	-32		29.5174		2008-12-01	25.3192	111.711		25.735	110.934
2008-11-19 19:15:00	16	0	0				2008-11-19 19:15:00	200	28.9493	-12				2008-12-02	25.1447	111.617		25.0875	111.09		Pop Reason
2008-11-19 19:30:00	16	0	0				2008-11-19 19:30:00	181	25.4803	-19				2008-12-03	24.6924	110.396		25.1066	111.219		Constant Pressure
2008-11-19 19:45:00	17	-5.37948	1				2008-11-19 19:45:00	189	26.9151	-11				2008-12-04	25.9778	111.673		24.8384	111.121		Data %	1.00019
2008-11-19 20:00:00	16	0	0				2008-11-19 20:00:00	188	26.7338	-15				2008-12-05	24.3988	110.699		24.8654	111.147
2008-11-19 20:15:00	18	-10.759	2				2008-11-19 20:15:00	187	26.553	-13				2008-12-06	23.9783	111.222		24.7908	111.22
2008-11-19 20:30:00	16	0	0				2008-11-19 20:30:00	189	26.9151	8				2008-12-07	25.2795	111.744		24.21	111.017
2008-11-19 20:45:00	16	0	-1				2008-11-19 20:45:00	188	26.7338	-1				2008-12-08	24.3195	110.764		24.21	110.963
2008-11-19 21:00:00	16	0	0				2008-11-19 21:00:00	188	26.7338	0				2008-12-09	23.0737	110.658		24.3877	110.881
2008-11-19 21:15:00	17	-5.37948	-1				2008-11-19 21:15:00	189	26.9151	2				2008-12-10	24.3988	110.425		24.8352	110.674
2008-11-19 21:30:00	16	0	0				2008-11-19 21:30:00	188	26.7338	-1				2008-12-11	24.8669	110.816		25.078	110.665
2008-11-19 21:45:00	16	0	0				2008-11-19 21:45:00	189	26.9151	1				2008-12-12	27.5171	110.706		25.2827	110.68
2008-11-19 22:00:00	16	0	0				2008-11-19 22:00:00	188	26.7338	0				2008-12-13	25.5334	110.719		25.5037	110.743
2008-11-19 22:15:00	19	-16.1384	2				2008-11-19 22:15:00	187	26.553	-2				2008-12-14	24.0973	110.732		25.7159	110.719
2008-11-19 22:30:00	19	-16.1384	3				2008-11-19 22:30:00	187	26.553	-1
2008-11-19 22:45:00	16	0	0				2008-11-19 22:45:00	186	26.3729	-3
2008-11-19 23:00:00	19	-16.1384	3				2008-11-19 23:00:00	186	26.3729	-2
2008-11-19 23:15:00	19	-16.1384	0				2008-11-19 23:15:00	187	26.553	0
2008-11-19 23:30:00	16	0	-3				2008-11-19 23:30:00	188	26.7338	1
2008-11-19 23:45:00	16	0	0				2008-11-19 23:45:00	189	26.9151	3
2008-11-20	16	0	X				2008-11-20	190	27.097	X
2008-11-20 00:15:00	18	-10.759	X				2008-11-20 00:15:00	189	26.9151	X
2008-11-20 00:30:00	16	0	X				2008-11-20 00:30:00	189	26.9151	X
2008-11-20 00:45:00	16	0	X				2008-11-20 00:45:00	190	27.097	X
2008-11-20 01:00:00	16	0	0				2008-11-20 01:00:00	189	26.9151	-1
2008-11-20 01:15:00	17	-5.37948	-1				2008-11-20 01:15:00	189	26.9151	0
2008-11-20 01:30:00	17	-5.37948	1				2008-11-20 01:30:00	189	26.9151	0
2008-11-20 01:45:00	17	-5.37948	1				2008-11-20 01:45:00	188	26.7338	-2
2008-11-20 02:00:00	17	-5.37948	1				2008-11-20 02:00:00	188	26.7338	-1
2008-11-20 02:15:00	17	-5.37948	0				2008-11-20 02:15:00	188	26.7338	-1
2008-11-20 02:30:00	16	0	-1				2008-11-20 02:30:00	189	26.9151	0
2008-11-20 02:45:00	17	-5.37948	0				2008-11-20 02:45:00	188	26.7338	0
2008-11-20 03:00:00	17	-5.37948	0				2008-11-20 03:00:00	188	26.7338	0
2008-11-20 03:15:00	17	-5.37948	0				2008-11-20 03:15:00	188	26.7338	0
2008-11-20 03:30:00	16	0	0				2008-11-20 03:30:00	189	26.9151	0
2008-11-20 03:45:00	16	0	-1				2008-11-20 03:45:00	188	26.7338	0
2008-11-20 04:00:00	16	0	-1				2008-11-20 04:00:00	188	26.7338	0
2008-11-20 04:15:00	17	-5.37948	0				2008-11-20 04:15:00	188	26.7338	0
2008-11-20 04:30:00	16	0	0				2008-11-20 04:30:00	188	26.7338	-1
2008-11-20 04:45:00	16	0	0				2008-11-20 04:45:00	188	26.7338	0
2008-11-20 05:00:00	16	0	0				2008-11-20 05:00:00	188	26.7338	0
2008-11-20 05:15:00	16	0	-1				2008-11-20 05:15:00	188	26.7338	0
2008-11-20 05:30:00	16	0	0				2008-11-20 05:30:00	188	26.7338	0
2008-11-20 05:45:00	16	0	0				2008-11-20 05:45:00	188	26.7338	0
2008-11-20 06:00:00	16	0	X				2008-11-20 06:00:00	188	26.7338	X
2008-11-20 06:15:00	17	-5.37948	X				2008-11-20 06:15:00	188	26.7338	X
2008-11-20 06:30:00	16	0	X				2008-11-20 06:30:00	187	26.553	X
2008-11-20 06:45:00	16	0	X				2008-11-20 06:45:00	188	26.7338	X
2008-11-20 07:00:00	16	0	0				2008-11-20 07:00:00	187	26.553	-1
2008-11-20 07:15:00	16	0	-1				2008-11-20 07:15:00	187	26.553	-1
2008-11-20 07:30:00	16	0	0				2008-11-20 07:30:00	188	26.7338	1
2008-11-20 07:45:00	16	0	0				2008-11-20 07:45:00	186	26.3729	-2
2008-11-20 08:00:00	16	0	0				2008-11-20 08:00:00	187	26.553	0
2008-11-20 08:15:00	16	0	0				2008-11-20 08:15:00	187	26.553	0
2008-11-20 08:30:00	16	0	0				2008-11-20 08:30:00	187	26.553	-1
2008-11-20 08:45:00	16	0	0				2008-11-20 08:45:00	186	26.3729	0
2008-11-20 09:00:00	16	0	0				2008-11-20 09:00:00	186	26.3729	-1
2008-11-20 09:15:00	16	0	0				2008-11-20 09:15:00	186	26.3729	-1
2008-11-20 09:30:00	16	0	0				2008-11-20 09:30:00	186	26.3729	-1
2008-11-20 09:45:00	16	0	0				2008-11-20 09:45:00	186	26.3729	0
2008-11-20 10:00:00	16	0	0				2008-11-20 10:00:00	185	26.1933	-1
2008-11-20 10:15:00	16	0	0				2008-11-20 10:15:00	187	26.553	1
2008-11-20 10:30:00	16	0	0				2008-11-20 10:30:00	186	26.3729	0
2008-11-20 10:45:00	16	0	0				2008-11-20 10:45:00	185	26.1933	-1
2008-11-20 11:00:00	18	-10.759	2				2008-11-20 11:00:00	187	26.553	2
2008-11-20 11:15:00	17	-5.37948	1				2008-11-20 11:15:00	187	26.553	0
2008-11-20 11:30:00	18	-10.759	2				2008-11-20 11:30:00	187	26.553	1
2008-11-20 11:45:00	18	-10.759	2				2008-11-20 11:45:00	187	26.553	2
2008-11-20 12:00:00	16	0	X				2008-11-20 12:00:00	187	26.553	X
2008-11-20 12:15:00	19	-16.1384	X				2008-11-20 12:15:00	187	26.553	X
2008-11-20 12:30:00	18	-10.759	X				2008-11-20 12:30:00	187	26.553	X
2008-11-20 12:45:00	16	0	X				2008-11-20 12:45:00	186	26.3729	X
2008-11-20 13:00:00	16	0	0				2008-11-20 13:00:00	186	26.3729	-1
2008-11-20 13:15:00	16	0	-3				2008-11-20 13:15:00	185	26.1933	-2
2008-11-20 13:30:00	17	-5.37948	-1				2008-11-20 13:30:00	185	26.1933	-2
2008-11-20 13:45:00	16	0	0				2008-11-20 13:45:00	184	26.0142	-2
2008-11-20 14:00:00	16	0	0				2008-11-20 14:00:00	186	26.3729	0
2008-11-20 14:15:00	17	-5.37948	1				2008-11-20 14:15:00	187	26.553	2
2008-11-20 14:30:00	16	0	-1				2008-11-20 14:30:00	184	26.0142	-1
2008-11-20 14:45:00	16	0	0				2008-11-20 14:45:00	184	26.0142	0
2008-11-20 15:00:00	16	0	0				2008-11-20 15:00:00	184	26.0142	-2
2008-11-20 15:15:00	17	-5.37948	0				2008-11-20 15:15:00	185	26.1933	-2
2008-11-20 15:30:00	16	0	0				2008-11-20 15:30:00	186	26.3729	2
2008-11-20 15:45:00	16	0	0				2008-11-20 15:45:00	185	26.1933	1
2008-11-20 16:00:00	16	0	0				2008-11-20 16:00:00	186	26.3729	2
2008-11-20 16:15:00	17	-5.37948	0				2008-11-20 16:15:00	185	26.1933	0
2008-11-20 16:30:00	19	-16.1384	3				2008-11-20 16:30:00	186	26.3729	0
2008-11-20 16:45:00	18	-10.759	2				2008-11-20 16:45:00	186	26.3729	1
2008-11-20 17:00:00	16	0	0				2008-11-20 17:00:00	187	26.553	1
2008-11-20 17:15:00	16	0	-1				2008-11-20 17:15:00	187	26.553	2
2008-11-20 17:30:00	18	-10.759	-1				2008-11-20 17:30:00	186	26.3729	0
2008-11-20 17:45:00	18	-10.759	0				2008-11-20 17:45:00	185	26.1933	-1
2008-11-20 18:00:00	19	-16.1384	X				2008-11-20 18:00:00	185	26.1933	X
2008-11-20 18:15:00	16	0	X				2008-11-20 18:15:00	186	26.3729	X
2008-11-20 18:30:00	16	0	X				2008-11-20 18:30:00	187	26.553	X
2008-11-20 18:45:00	16	0	X				2008-11-20 18:45:00	188	26.7338	X
2008-11-20 19:00:00	17	-5.37948	-2				2008-11-20 19:00:00	186	26.3729	1
2008-11-20 19:15:00	16	0	0				2008-11-20 19:15:00	188	26.7338	2
2008-11-20 19:30:00	16	0	0				2008-11-20 19:30:00	188	26.7338	1
2008-11-20 19:45:00	16	0	0				2008-11-20 19:45:00	189	26.9151	1
2008-11-20 20:00:00	16	0	-1				2008-11-20 20:00:00	188	26.7338	2
2008-11-20 20:15:00	16	0	0				2008-11-20 20:15:00	188	26.7338	0
2008-11-20 20:30:00	16	0	0				2008-11-20 20:30:00	187	26.553	-1
2008-11-20 20:45:00	16	0	0				2008-11-20 20:45:00	189	26.9151	0
2008-11-20 21:00:00	17	-5.37948	1				2008-11-20 21:00:00	187	26.553	-1
2008-11-20 21:15:00	17	-5.37948	1				2008-11-20 21:15:00	187	26.553	-1
2008-11-20 21:30:00	19	-16.1384	3				2008-11-20 21:30:00	187	26.553	0
2008-11-20 21:45:00	16	0	0				2008-11-20 21:45:00	188	26.7338	-1
2008-11-20 22:00:00	16	0	-1				2008-11-20 22:00:00	188	26.7338	1
2008-11-20 22:15:00	16	0	-1				2008-11-20 22:15:00	188	26.7338	1
2008-11-20 22:30:00	17	-5.37948	-2				2008-11-20 22:30:00	188	26.7338	1
2008-11-20 22:45:00	17	-5.37948	1				2008-11-20 22:45:00	186	26.3729	-2
2008-11-20 23:00:00	16	0	0				2008-11-20 23:00:00	188	26.7338	0
2008-11-20 23:15:00	16	0	0				2008-11-20 23:15:00	188	26.7338	0
2008-11-20 23:30:00	16	0	-1				2008-11-20 23:30:00	187	26.553	-1
2008-11-20 23:45:00	16	0	-1				2008-11-20 23:45:00	187	26.553	1
2008-11-21	16	0	X				2008-11-21	186	26.3729	X
2008-11-21 00:15:00	16	0	X				2008-11-21 00:15:00	187	26.553	X
2008-11-21 00:30:00	17	-5.37948	X				2008-11-21 00:30:00	187	26.553	X
2008-11-21 00:45:00	16	0	X				2008-11-21 00:45:00	187	26.553	X
2008-11-21 01:00:00	16	0	0				2008-11-21 01:00:00	188	26.7338	2
2008-11-21 01:15:00	16	0	0				2008-11-21 01:15:00	187	26.553	0
2008-11-21 01:30:00	19	-16.1384	2				2008-11-21 01:30:00	187	26.553	0
2008-11-21 01:45:00	17	-5.37948	1				2008-11-21 01:45:00	187	26.553	0
2008-11-21 02:00:00	17	-5.37948	1				2008-11-21 02:00:00	187	26.553	-1
2008-11-21 02:15:00	16	0	0				2008-11-21 02:15:00	187	26.553	0
2008-11-21 02:30:00	17	-5.37948	-2				2008-11-21 02:30:00	187	26.553	0
2008-11-21 02:45:00	20	-21.5179	3				2008-11-21 02:45:00	187	26.553	0
2008-11-21 03:00:00	17	-5.37948	0				2008-11-21 03:00:00	187	26.553	0
2008-11-21 03:15:00	19	-16.1384	3				2008-11-21 03:15:00	187	26.553	0
2008-11-21 03:30:00	16	0	-1				2008-11-21 03:30:00	187	26.553	0
2008-11-21 03:45:00	17	-5.37948	-3				2008-11-21 03:45:00	188	26.7338	1
2008-11-21 04:00:00	18	-10.759	1				2008-11-21 04:00:00	188	26.7338	1
2008-11-21 04:15:00	16	0	-3				2008-11-21 04:15:00	187	26.553	0
2008-11-21 04:30:00	17	-5.37948	1				2008-11-21 04:30:00	188	26.7338	1
2008-11-21 04:45:00	16	0	-1				2008-11-21 04:45:00	188	26.7338	0
2008-11-21 05:00:00	16	0	-2				2008-11-21 05:00:00	188	26.7338	0
2008-11-21 05:15:00	16	0	0				2008-11-21 05:15:00	188	26.7338	1
2008-11-21 05:30:00	16	0	-1				2008-11-21 05:30:00	188	26.7338	0
2008-11-21 05:45:00	16	0	0				2008-11-21 05:45:00	188	26.7338	0
2008-11-21 06:00:00	16	0	X				2008-11-21 06:00:00	187	26.553	X
2008-11-21 06:15:00	16	0	X				2008-11-21 06:15:00	187	26.553	X
2008-11-21 06:30:00	16	0	X				2008-11-21 06:30:00	187	26.553	X
2008-11-21 06:45:00	16	0	X				2008-11-21 06:45:00	187	26.553	X
2008-11-21 07:00:00	16	0	0				2008-11-21 07:00:00	187	26.553	0
2008-11-21 07:15:00	16	0	0				2008-11-21 07:15:00	187	26.553	0
2008-11-21 07:30:00	16	0	0				2008-11-21 07:30:00	187	26.553	0
2008-11-21 07:45:00	16	0	0				2008-11-21 07:45:00	187	26.553	0
2008-11-21 08:00:00	16	0	0				2008-11-21 08:00:00	187	26.553	0
2008-11-21 08:15:00	16	0	0				2008-11-21 08:15:00	186	26.3729	-1
2008-11-21 08:30:00	16	0	0				2008-11-21 08:30:00	186	26.3729	-1
2008-11-21 08:45:00	16	0	0				2008-11-21 08:45:00	185	26.1933	-2
2008-11-21 09:00:00	16	0	0				2008-11-21 09:00:00	185	26.1933	-2
2008-11-21 09:15:00	16	0	0				2008-11-21 09:15:00	186	26.3729	0
2008-11-21 09:30:00	16	0	0				2008-11-21 09:30:00	186	26.3729	0
2008-11-21 09:45:00	16	0	0				2008-11-21 09:45:00	186	26.3729	1
2008-11-21 10:00:00	16	0	0				2008-11-21 10:00:00	185	26.1933	0
2008-11-21 10:15:00	16	0	0				2008-11-21 10:15:00	185	26.1933	-1
2008-11-21 10:30:00	16	0	0				2008-11-21 10:30:00	186	26.3729	0
2008-11-21 10:45:00	17	-5.37948	1				2008-11-21 10:45:00	186	26.3729	0
2008-11-21 11:00:00	16	0	0				2008-11-21 11:00:00	184	26.0142	-1
2008-11-21 11:15:00	16	0	0				2008-11-21 11:15:00	184	26.0142	-1
2008-11-21 11:30:00	16	0	0				2008-11-21 11:30:00	184	26.0142	-2
2008-11-21 11:45:00	16	0	-1				2008-11-21 11:45:00	183	25.8357	-3
2008-11-21 12:00:00	16	0	X				2008-11-21 12:00:00	183	25.8357	X
2008-11-21 12:15:00	16	0	X				2008-11-21 12:15:00	185	26.1933	X
2008-11-21 12:30:00	17	-5.37948	X				2008-11-21 12:30:00	185	26.1933	X
2008-11-21 12:45:00	16	0	X				2008-11-21 12:45:00	184	26.0142	X
2008-11-21 13:00:00	16	0	0				2008-11-21 13:00:00	183	25.8357	0
2008-11-21 13:15:00	16	0	0				2008-11-21 13:15:00	184	26.0142	-1
2008-11-21 13:30:00	16	0	-1				2008-11-21 13:30:00	180	25.3034	-5
2008-11-21 13:45:00	16	0	0				2008-11-21 13:45:00	180	25.3034	-4
2008-11-21 14:00:00	16	0	0				2008-11-21 14:00:00	183	25.8357	0
2008-11-21 14:15:00	16	0	0				2008-11-21 14:15:00	182	25.6577	-2
2008-11-21 14:30:00	16	0	0				2008-11-21 14:30:00	184	26.0142	4
2008-11-21 14:45:00	16	0	0				2008-11-21 14:45:00	184	26.0142	4
2008-11-21 15:00:00	16	0	0				2008-11-21 15:00:00	185	26.1933	2
2008-11-21 15:15:00	16	0	0				2008-11-21 15:15:00	185	26.1933	3
2008-11-21 15:30:00	16	0	0				2008-11-21 15:30:00	186	26.3729	2
2008-11-21 15:45:00	17	-5.37948	1				2008-11-21 15:45:00	186	26.3729	2
2008-11-21 16:00:00	16	0	0				2008-11-21 16:00:00	182	25.6577	-3
2008-11-21 16:15:00	16	0	0				2008-11-21 16:15:00	183	25.8357	-2
2008-11-21 16:30:00	16	0	0				2008-11-21 16:30:00	184	26.0142	-2
2008-11-21 16:45:00	16	0	-1				2008-11-21 16:45:00	184	26.0142	-2
2008-11-21 17:00:00	16	0	0				2008-11-21 17:00:00	184	26.0142	2
2008-11-21 17:15:00	16	0	0				2008-11-21 17:15:00	183	25.8357	0
2008-11-21 17:30:00	16	0	0				2008-11-21 17:30:00	184	26.0142	0
2008-11-21 17:45:00	16	0	0				2008-11-21 17:45:00	184	26.0142	0
2008-11-21 18:00:00	16	0	X				2008-11-21 18:00:00	184	26.0142	X
2008-11-21 18:15:00	16	0	X				2008-11-21 18:15:00	185	26.1933	X
2008-11-21 18:30:00	17	-5.37948	X				2008-11-21 18:30:00	184	26.0142	X
2008-11-21 18:45:00	17	-5.37948	X				2008-11-21 18:45:00	181	25.4803	X
2008-11-21 19:00:00	16	0	0				2008-11-21 19:00:00	185	26.1933	1
2008-11-21 19:15:00	16	0	0				2008-11-21 19:15:00	186	26.3729	1
2008-11-21 19:30:00	16	0	-1				2008-11-21 19:30:00	187	26.553	3
2008-11-21 19:45:00	17	-5.37948	0				2008-11-21 19:45:00	187	26.553	6
2008-11-21 20:00:00	17	-5.37948	1				2008-11-21 20:00:00	186	26.3729	1
2008-11-21 20:15:00	16	0	0				2008-11-21 20:15:00	187	26.553	1
2008-11-21 20:30:00	16	0	0				2008-11-21 20:30:00	188	26.7338	1
2008-11-21 20:45:00	16	0	-1				2008-11-21 20:45:00	187	26.553	0
2008-11-21 21:00:00	16	0	-1				2008-11-21 21:00:00	188	26.7338	2
2008-11-21 21:15:00	17	-5.37948	1				2008-11-21 21:15:00	187	26.553	0
2008-11-21 21:30:00	17	-5.37948	1				2008-11-21 21:30:00	187	26.553	-1
2008-11-21 21:45:00	16	0	0				2008-11-21 21:45:00	187	26.553	0
2008-11-21 22:00:00	17	-5.37948	1				2008-11-21 22:00:00	187	26.553	-1
2008-11-21 22:15:00	17	-5.37948	0				2008-11-21 22:15:00	187	26.553	0
2008-11-21 22:30:00	17	-5.37948	0				2008-11-21 22:30:00	187	26.553	0
2008-11-21 22:45:00	17	-5.37948	1				2008-11-21 22:45:00	187	26.553	0
2008-11-21 23:00:00	17	-5.37948	0				2008-11-21 23:00:00	187	26.553	0
2008-11-21 23:15:00	18	-10.759	1				2008-11-21 23:15:00	187	26.553	0
2008-11-21 23:30:00	17	-5.37948	0				2008-11-21 23:30:00	187	26.553	0
2008-11-21 23:45:00	16	0	-1				2008-11-21 23:45:00	187	26.553	0
2008-11-22	16	0	X				2008-11-22	187	26.553	X
2008-11-22 00:15:00	16	0	X				2008-11-22 00:15:00	187	26.553	X
2008-11-22 00:30:00	16	0	X				2008-11-22 00:30:00	186	26.3729	X
2008-11-22 00:45:00	16	0	X				2008-11-22 00:45:00	186	26.3729	X
2008-11-22 01:00:00	16	0	0				2008-11-22 01:00:00	186	26.3729	-1
2008-11-22 01:15:00	16	0	0				2008-11-22 01:15:00	186	26.3729	-1
2008-11-22 01:30:00	16	0	0				2008-11-22 01:30:00	186	26.3729	0
2008-11-22 01:45:00	16	0	0				2008-11-22 01:45:00	186	26.3729	0
2008-11-22 02:00:00	16	0	0				2008-11-22 02:00:00	186	26.3729	0
2008-11-22 02:15:00	16	0	0				2008-11-22 02:15:00	186	26.3729	0
2008-11-22 02:30:00	16	0	0				2008-11-22 02:30:00	186	26.3729	0
2008-11-22 02:45:00	16	0	0				2008-11-22 02:45:00	186	26.3729	0
2008-11-22 03:00:00	16	0	0				2008-11-22 03:00:00	185	26.1933	-1
2008-11-22 03:15:00	16	0	0				2008-11-22 03:15:00	186	26.3729	0
2008-11-22 03:30:00	16	0	0				2008-11-22 03:30:00	186	26.3729	0
2008-11-22 03:45:00	16	0	0				2008-11-22 03:45:00	186	26.3729	0
2008-11-22 04:00:00	16	0	0				2008-11-22 04:00:00	186	26.3729	1
2008-11-22 04:15:00	16	0	0				2008-11-22 04:15:00	185	26.1933	-1
2008-11-22 04:30:00	16	0	0				2008-11-22 04:30:00	185	26.1933	-1
2008-11-22 04:45:00	16	0	0				2008-11-22 04:45:00	185	26.1933	-1
2008-11-22 05:00:00	16	0	0				2008-11-22 05:00:00	185	26.1933	-1
2008-11-22 05:15:00	16	0	0				2008-11-22 05:15:00	185	26.1933	0
2008-11-22 05:30:00	16	0	0				2008-11-22 05:30:00	185	26.1933	0
2008-11-22 05:45:00	16	0	0				2008-11-22 05:45:00	185	26.1933	0
2008-11-22 06:00:00	16	0	X				2008-11-22 06:00:00	185	26.1933	X
2008-11-22 06:15:00	16	0	X				2008-11-22 06:15:00	185	26.1933	X
2008-11-22 06:30:00	16	0	X				2008-11-22 06:30:00	185	26.1933	X
2008-11-22 06:45:00	16	0	X				2008-11-22 06:45:00	185	26.1933	X
2008-11-22 07:00:00	16	0	0				2008-11-22 07:00:00	184	26.0142	-1
2008-11-22 07:15:00	16	0	0				2008-11-22 07:15:00	184	26.0142	-1
2008-11-22 07:30:00	16	0	0				2008-11-22 07:30:00	184	26.0142	-1
2008-11-22 07:45:00	16	0	0				2008-11-22 07:45:00	184	26.0142	-1
2008-11-22 08:00:00	16	0	0				2008-11-22 08:00:00	184	26.0142	0
2008-11-22 08:15:00	16	0	0				2008-11-22 08:15:00	184	26.0142	0
2008-11-22 08:30:00	16	0	0				2008-11-22 08:30:00	183	25.8357	-1
2008-11-22 08:45:00	16	0	0				2008-11-22 08:45:00	185	26.1933	1
2008-11-22 09:00:00	16	0	0				2008-11-22 09:00:00	186	26.3729	2
2008-11-22 09:15:00	16	0	0				2008-11-22 09:15:00	184	26.0142	0
2008-11-22 09:30:00	16	0	0				2008-11-22 09:30:00	185	26.1933	2
2008-11-22 09:45:00	16	0	0				2008-11-22 09:45:00	183	25.8357	-2
2008-11-22 10:00:00	16	0	0				2008-11-22 10:00:00	183	25.8357	-3
2008-11-22 10:15:00	16	0	0				2008-11-22 10:15:00	183	25.8357	-1
2008-11-22 10:30:00	16	0	0				2008-11-22 10:30:00	183	25.8357	-2
2008-11-22 10:45:00	16	0	0				2008-11-22 10:45:00	183	25.8357	0
2008-11-22 11:00:00	16	0	0				2008-11-22 11:00:00	183	25.8357	0
2008-11-22 11:15:00	16	0	0				2008-11-22 11:15:00	183	25.8357	0
2008-11-22 11:30:00	16	0	0				2008-11-22 11:30:00	185	26.1933	2
2008-11-22 11:45:00	16	0	0				2008-11-22 11:45:00	183	25.8357	0
2008-11-22 12:00:00	16	0	X				2008-11-22 12:00:00	183	25.8357	X
2008-11-22 12:15:00	16	0	X				2008-11-22 12:15:00	185	26.1933	X
2008-11-22 12:30:00	17	-5.37948	X				2008-11-22 12:30:00	185	26.1933	X
2008-11-22 12:45:00	17	-5.37948	X				2008-11-22 12:45:00	185	26.1933	X
2008-11-22 13:00:00	16	0	0				2008-11-22 13:00:00	185	26.1933	2
2008-11-22 13:15:00	16	0	0				2008-11-22 13:15:00	185	26.1933	0
2008-11-22 13:30:00	16	0	-1				2008-11-22 13:30:00	185	26.1933	0
2008-11-22 13:45:00	16	0	-1				2008-11-22 13:45:00	185	26.1933	0
2008-11-22 14:00:00	18	-10.759	2				2008-11-22 14:00:00	185	26.1933	0
2008-11-22 14:15:00	18	-10.759	2				2008-11-22 14:15:00	184	26.0142	-1
2008-11-22 14:30:00	16	0	0				2008-11-22 14:30:00	184	26.0142	-1
2008-11-22 14:45:00	16	0	0				2008-11-22 14:45:00	184	26.0142	-1
2008-11-22 15:00:00	16	0	-2				2008-11-22 15:00:00	184	26.0142	-1
2008-11-22 15:15:00	16	0	-2				2008-11-22 15:15:00	184	26.0142	0
2008-11-22 15:30:00	16	0	0				2008-11-22 15:30:00	184	26.0142	0
2008-11-22 15:45:00	17	-5.37948	1				2008-11-22 15:45:00	184	26.0142	0
2008-11-22 16:00:00	16	0	0				2008-11-22 16:00:00	184	26.0142	0
2008-11-22 16:15:00	16	0	0				2008-11-22 16:15:00	185	26.1933	1
2008-11-22 16:30:00	16	0	0				2008-11-22 16:30:00	184	26.0142	0
2008-11-22 16:45:00	17	-5.37948	0				2008-11-22 16:45:00	185	26.1933	1
2008-11-22 17:00:00	16	0	0				2008-11-22 17:00:00	185	26.1933	1
2008-11-22 17:15:00	16	0	0				2008-11-22 17:15:00	185	26.1933	0
2008-11-22 17:30:00	16	0	0				2008-11-22 17:30:00	185	26.1933	1
2008-11-22 17:45:00	16	0	-1				2008-11-22 17:45:00	187	26.553	2
2008-11-22 18:00:00	16	0	X				2008-11-22 18:00:00	187	26.553	X
2008-11-22 18:15:00	16	0	X				2008-11-22 18:15:00	187	26.553	X
2008-11-22 18:30:00	17	-5.37948	X				2008-11-22 18:30:00	187	26.553	X
2008-11-22 18:45:00	17	-5.37948	X				2008-11-22 18:45:00	186	26.3729	X
2008-11-22 19:00:00	16	0	0				2008-11-22 19:00:00	187	26.553	0
2008-11-22 19:15:00	16	0	0				2008-11-22 19:15:00	187	26.553	0
2008-11-22 19:30:00	18	-10.759	1				2008-11-22 19:30:00	185	26.1933	-2
2008-11-22 19:45:00	19	-16.1384	2				2008-11-22 19:45:00	184	26.0142	-2
2008-11-22 20:00:00	16	0	0				2008-11-22 20:00:00	186	26.3729	-1
2008-11-22 20:15:00	16	0	0				2008-11-22 20:15:00	186	26.3729	-1
2008-11-22 20:30:00	16	0	-2				2008-11-22 20:30:00	186	26.3729	1
2008-11-22 20:45:00	16	0	-3				2008-11-22 20:45:00	185	26.1933	1
2008-11-22 21:00:00	16	0	0				2008-11-22 21:00:00	186	26.3729	0
2008-11-22 21:15:00	16	0	0				2008-11-22 21:15:00	186	26.3729	0
2008-11-22 21:30:00	16	0	0				2008-11-22 21:30:00	187	26.553	1
2008-11-22 21:45:00	16	0	0				2008-11-22 21:45:00	187	26.553	2
2008-11-22 22:00:00	16	0	0				2008-11-22 22:00:00	187	26.553	1
2008-11-22 22:15:00	16	0	0				2008-11-22 22:15:00	187	26.553	1
2008-11-22 22:30:00	16	0	0				2008-11-22 22:30:00	187	26.553	0
2008-11-22 22:45:00	16	0	0				2008-11-22 22:45:00	187	26.553	0
2008-11-22 23:00:00	16	0	0				2008-11-22 23:00:00	186	26.3729	-1
2008-11-22 23:15:00	16	0	0				2008-11-22 23:15:00	186	26.3729	-1
2008-11-22 23:30:00	16	0	0				2008-11-22 23:30:00	185	26.1933	-2
2008-11-22 23:45:00	16	0	0				2008-11-22 23:45:00	185	26.1933	-2
2008-11-23	16	0	X				2008-11-23	185	26.1933	X
2008-11-23 00:15:00	16	0	X				2008-11-23 00:15:00	186	26.3729	X
2008-11-23 00:30:00	16	0	X				2008-11-23 00:30:00	186	26.3729	X
2008-11-23 00:45:00	16	0	X				2008-11-23 00:45:00	186	26.3729	X
2008-11-23 01:00:00	16	0	0				2008-11-23 01:00:00	186	26.3729	1
2008-11-23 01:15:00	16	0	0				2008-11-23 01:15:00	186	26.3729	0
2008-11-23 01:30:00	16	0	0				2008-11-23 01:30:00	186	26.3729	0
2008-11-23 01:45:00	16	0	0				2008-11-23 01:45:00	186	26.3729	0
2008-11-23 02:00:00	16	0	0				2008-11-23 02:00:00	186	26.3729	0
2008-11-23 02:15:00	16	0	0				2008-11-23 02:15:00	186	26.3729	0
2008-11-23 02:30:00	16	0	0				2008-11-23 02:30:00	186	26.3729	0
2008-11-23 02:45:00	16	0	0				2008-11-23 02:45:00	186	26.3729	0
2008-11-23 03:00:00	16	0	0				2008-11-23 03:00:00	186	26.3729	0
2008-11-23 03:15:00	16	0	0				2008-11-23 03:15:00	186	26.3729	0
2008-11-23 03:30:00	16	0	0				2008-11-23 03:30:00	186	26.3729	0
2008-11-23 03:45:00	17	-5.37948	1				2008-11-23 03:45:00	186	26.3729	0
2008-11-23 04:00:00	17	-5.37948	1				2008-11-23 04:00:00	185	26.1933	-1
2008-11-23 04:15:00	16	0	0				2008-11-23 04:15:00	185	26.1933	-1
2008-11-23 04:30:00	18	-10.759	2				2008-11-23 04:30:00	185	26.1933	-1
2008-11-23 04:45:00	16	0	-1				2008-11-23 04:45:00	185	26.1933	-1
2008-11-23 05:00:00	16	0	-1				2008-11-23 05:00:00	185	26.1933	0
2008-11-23 05:15:00	16	0	0				2008-11-23 05:15:00	185	26.1933	0
2008-11-23 05:30:00	16	0	-2				2008-11-23 05:30:00	185	26.1933	0
2008-11-23 05:45:00	16	0	0				2008-11-23 05:45:00	185	26.1933	0
2008-11-23 06:00:00	16	0	X				2008-11-23 06:00:00	185	26.1933	X
2008-11-23 06:15:00	16	0	X				2008-11-23 06:15:00	185	26.1933	X
2008-11-23 06:30:00	16	0	X				2008-11-23 06:30:00	185	26.1933	X
2008-11-23 06:45:00	16	0	X				2008-11-23 06:45:00	184	26.0142	X
2008-11-23 07:00:00	16	0	0				2008-11-23 07:00:00	185	26.1933	0
2008-11-23 07:15:00	16	0	0				2008-11-23 07:15:00	185	26.1933	0
2008-11-23 07:30:00	16	0	0				2008-11-23 07:30:00	185	26.1933	0
2008-11-23 07:45:00	16	0	0				2008-11-23 07:45:00	185	26.1933	1
2008-11-23 08:00:00	16	0	0				2008-11-23 08:00:00	185	26.1933	0
2008-11-23 08:15:00	17	-5.37948	1				2008-11-23 08:15:00	185	26.1933	0
2008-11-23 08:30:00	16	0	0				2008-11-23 08:30:00	185	26.1933	0
2008-11-23 08:45:00	17	-5.37948	1				2008-11-23 08:45:00	185	26.1933	0
2008-11-23 09:00:00	16	0	0				2008-11-23 09:00:00	185	26.1933	0
2008-11-23 09:15:00	16	0	-1				2008-11-23 09:15:00	185	26.1933	0
2008-11-23 09:30:00	16	0	0				2008-11-23 09:30:00	185	26.1933	0
2008-11-23 09:45:00	16	0	-1				2008-11-23 09:45:00	185	26.1933	0
2008-11-23 10:00:00	18	-10.759	2				2008-11-23 10:00:00	185	26.1933	0
2008-11-23 10:15:00	16	0	0				2008-11-23 10:15:00	183	25.8357	-2
2008-11-23 10:30:00	16	0	0				2008-11-23 10:30:00	184	26.0142	-1
2008-11-23 10:45:00	16	0	0				2008-11-23 10:45:00	184	26.0142	-1
2008-11-23 11:00:00	16	0	-2				2008-11-23 11:00:00	184	26.0142	-1
2008-11-23 11:15:00	16	0	0				2008-11-23 11:15:00	184	26.0142	1
2008-11-23 11:30:00	16	0	0				2008-11-23 11:30:00	183	25.8357	-1
2008-11-23 11:45:00	16	0	0				2008-11-23 11:45:00	184	26.0142	0
2008-11-23 12:00:00	16	0	X				2008-11-23 12:00:00	184	26.0142	X
2008-11-23 12:15:00	16	0	X				2008-11-23 12:15:00	184	26.0142	X
2008-11-23 12:30:00	16	0	X				2008-11-23 12:30:00	185	26.1933	X
2008-11-23 12:45:00	16	0	X				2008-11-23 12:45:00	184	26.0142	X
2008-11-23 13:00:00	16	0	0				2008-11-23 13:00:00	183	25.8357	-1
2008-11-23 13:15:00	16	0	0				2008-11-23 13:15:00	183	25.8357	-1
2008-11-23 13:30:00	16	0	0				2008-11-23 13:30:00	185	26.1933	0
2008-11-23 13:45:00	18	-10.759	2				2008-11-23 13:45:00	185	26.1933	1
2008-11-23 14:00:00	16	0	0				2008-11-23 14:00:00	183	25.8357	0
2008-11-23 14:15:00	16	0	0				2008-11-23 14:15:00	184	26.0142	1
2008-11-23 14:30:00	16	0	0				2008-11-23 14:30:00	184	26.0142	-1
2008-11-23 14:45:00	16	0	-2				2008-11-23 14:45:00	182	25.6577	-3
2008-11-23 15:00:00	17	-5.37948	1				2008-11-23 15:00:00	184	26.0142	1
2008-11-23 15:15:00	17	-5.37948	1				2008-11-23 15:15:00	184	26.0142	0
2008-11-23 15:30:00	17	-5.37948	1				2008-11-23 15:30:00	184	26.0142	0
2008-11-23 15:45:00	16	0	0				2008-11-23 15:45:00	184	26.0142	2
2008-11-23 16:00:00	16	0	-1				2008-11-23 16:00:00	184	26.0142	0
2008-11-23 16:15:00	16	0	-1				2008-11-23 16:15:00	184	26.0142	0
2008-11-23 16:30:00	16	0	-1				2008-11-23 16:30:00	185	26.1933	1
2008-11-23 16:45:00	17	-5.37948	1				2008-11-23 16:45:00	185	26.1933	1
2008-11-23 17:00:00	19	-16.1384	3				2008-11-23 17:00:00	184	26.0142	0
2008-11-23 17:15:00	18	-10.759	2				2008-11-23 17:15:00	184	26.0142	0
2008-11-23 17:30:00	17	-5.37948	1				2008-11-23 17:30:00	185	26.1933	0
2008-11-23 17:45:00	16	0	-1				2008-11-23 17:45:00	184	26.0142	-1
2008-11-23 18:00:00	16	0	X				2008-11-23 18:00:00	183	25.8357	X
2008-11-23 18:15:00	16	0	X				2008-11-23 18:15:00	183	25.8357	X
2008-11-23 18:30:00	16	0	X				2008-11-23 18:30:00	180	25.3034	X
2008-11-23 18:45:00	17	-5.37948	X				2008-11-23 18:45:00	184	26.0142	X
2008-11-23 19:00:00	16	0	0				2008-11-23 19:00:00	186	26.3729	3
2008-11-23 19:15:00	16	0	0				2008-11-23 19:15:00	186	26.3729	3
2008-11-23 19:30:00	16	0	0				2008-11-23 19:30:00	186	26.3729	6
2008-11-23 19:45:00	17	-5.37948	0				2008-11-23 19:45:00	186	26.3729	2
2008-11-23 20:00:00	17	-5.37948	1				2008-11-23 20:00:00	186	26.3729	0
2008-11-23 20:15:00	17	-5.37948	1				2008-11-23 20:15:00	186	26.3729	0
2008-11-23 20:30:00	17	-5.37948	1				2008-11-23 20:30:00	186	26.3729	0
2008-11-23 20:45:00	17	-5.37948	0				2008-11-23 20:45:00	186	26.3729	0
2008-11-23 21:00:00	17	-5.37948	0				2008-11-23 21:00:00	186	26.3729	0
2008-11-23 21:15:00	16	0	-1				2008-11-23 21:15:00	186	26.3729	0
2008-11-23 21:30:00	17	-5.37948	0				2008-11-23 21:30:00	186	26.3729	0
2008-11-23 21:45:00	17	-5.37948	0				2008-11-23 21:45:00	186	26.3729	0
2008-11-23 22:00:00	17	-5.37948	0				2008-11-23 22:00:00	186	26.3729	0
2008-11-23 22:15:00	17	-5.37948	1				2008-11-23 22:15:00	186	26.3729	0
2008-11-23 22:30:00	17	-5.37948	0				2008-11-23 22:30:00	186	26.3729	0
2008-11-23 22:45:00	16	0	-1				2008-11-23 22:45:00	187	26.553	1
2008-11-23 23:00:00	16	0	-1				2008-11-23 23:00:00	187	26.553	1
2008-11-23 23:15:00	16	0	-1				2008-11-23 23:15:00	186	26.3729	0
2008-11-23 23:30:00	17	-5.37948	0				2008-11-23 23:30:00	186	26.3729	0
2008-11-23 23:45:00	16	0	0				2008-11-23 23:45:00	186	26.3729	-1
2008-11-24	16	0	X				2008-11-24	186	26.3729	X
2008-11-24 00:15:00	16	0	X				2008-11-24 00:15:00	187	26.553	X
2008-11-24 00:30:00	16	0	X				2008-11-24 00:30:00	186	26.3729	X
2008-11-24 00:45:00	16	0	X				2008-11-24 00:45:00	187	26.553	X
2008-11-24 01:00:00	16	0	0				2008-11-24 01:00:00	186	26.3729	0
2008-11-24 01:15:00	16	0	0				2008-11-24 01:15:00	187	26.553	0
2008-11-24 01:30:00	19	-16.1384	3				2008-11-24 01:30:00	186	26.3729	0
2008-11-24 01:45:00	16	0	0				2008-11-24 01:45:00	186	26.3729	-1
2008-11-24 02:00:00	16	0	0				2008-11-24 02:00:00	186	26.3729	0
2008-11-24 02:15:00	16	0	0				2008-11-24 02:15:00	186	26.3729	-1
2008-11-24 02:30:00	16	0	-3				2008-11-24 02:30:00	186	26.3729	0
2008-11-24 02:45:00	16	0	0				2008-11-24 02:45:00	185	26.1933	-1
2008-11-24 03:00:00	16	0	0				2008-11-24 03:00:00	185	26.1933	-1
2008-11-24 03:15:00	16	0	0				2008-11-24 03:15:00	185	26.1933	-1
2008-11-24 03:30:00	18	-10.759	2				2008-11-24 03:30:00	185	26.1933	-1
2008-11-24 03:45:00	17	-5.37948	1				2008-11-24 03:45:00	185	26.1933	0
2008-11-24 04:00:00	18	-10.759	2				2008-11-24 04:00:00	185	26.1933	0
2008-11-24 04:15:00	16	0	0				2008-11-24 04:15:00	185	26.1933	0
2008-11-24 04:30:00	20	-21.5179	2				2008-11-24 04:30:00	185	26.1933	0
2008-11-24 04:45:00	16	0	-1				2008-11-24 04:45:00	185	26.1933	0
2008-11-24 05:00:00	18	-10.759	0				2008-11-24 05:00:00	185	26.1933	0
2008-11-24 05:15:00	18	-10.759	2				2008-11-24 05:15:00	185	26.1933	0
2008-11-24 05:30:00	16	0	-4				2008-11-24 05:30:00	185	26.1933	0
2008-11-24 05:45:00	16	0	0				2008-11-24 05:45:00	185	26.1933	0
2008-11-24 06:00:00	16	0	X				2008-11-24 06:00:00	184	26.0142	X
2008-11-24 06:15:00	16	0	X				2008-11-24 06:15:00	185	26.1933	X
2008-11-24 06:30:00	16	0	X				2008-11-24 06:30:00	184	26.0142	X
2008-11-24 06:45:00	16	0	X				2008-11-24 06:45:00	185	26.1933	X
2008-11-24 07:00:00	16	0	0				2008-11-24 07:00:00	185	26.1933	1
2008-11-24 07:15:00	16	0	0				2008-11-24 07:15:00	184	26.0142	-1
2008-11-24 07:30:00	16	0	0				2008-11-24 07:30:00	184	26.0142	0
2008-11-24 07:45:00	16	0	0				2008-11-24 07:45:00	184	26.0142	-1
2008-11-24 08:00:00	16	0	0				2008-11-24 08:00:00	184	26.0142	-1
2008-11-24 08:15:00	16	0	0				2008-11-24 08:15:00	184	26.0142	0
2008-11-24 08:30:00	16	0	0				2008-11-24 08:30:00	184	26.0142	0
2008-11-24 08:45:00	16	0	0				2008-11-24 08:45:00	184	26.0142	0
2008-11-24 09:00:00	16	0	0				2008-11-24 09:00:00	185	26.1933	1
2008-11-24 09:15:00	16	0	0				2008-11-24 09:15:00	184	26.0142	0
2008-11-24 09:30:00	16	0	0				2008-11-24 09:30:00	183	25.8357	-1
2008-11-24 09:45:00	16	0	0				2008-11-24 09:45:00	183	25.8357	-1
2008-11-24 10:00:00	16	0	0				2008-11-24 10:00:00	185	26.1933	0
2008-11-24 10:15:00	16	0	0				2008-11-24 10:15:00	185	26.1933	1
2008-11-24 10:30:00	16	0	0				2008-11-24 10:30:00	184	26.0142	1
2008-11-24 10:45:00	16	0	0				2008-11-24 10:45:00	183	25.8357	0
2008-11-24 11:00:00	16	0	0				2008-11-24 11:00:00	183	25.8357	-2
2008-11-24 11:15:00	16	0	0				2008-11-24 11:15:00	184	26.0142	-1
2008-11-24 11:30:00	16	0	0				2008-11-24 11:30:00	182	25.6577	-2
2008-11-24 11:45:00	16	0	0				2008-11-24 11:45:00	183	25.8357	0
2008-11-24 12:00:00	16	0	X				2008-11-24 12:00:00	184	26.0142	X
2008-11-24 12:15:00	16	0	X				2008-11-24 12:15:00	183	25.8357	X
2008-11-24 12:30:00	16	0	X				2008-11-24 12:30:00	184	26.0142	X
2008-11-24 12:45:00	19	-16.1384	X				2008-11-24 12:45:00	185	26.1933	X
2008-11-24 13:00:00	17	-5.37948	1				2008-11-24 13:00:00	185	26.1933	1
2008-11-24 13:15:00	16	0	0				2008-11-24 13:15:00	185	26.1933	2
2008-11-24 13:30:00	16	0	0				2008-11-24 13:30:00	185	26.1933	1
2008-11-24 13:45:00	16	0	-3				2008-11-24 13:45:00	183	25.8357	-2
2008-11-24 14:00:00	17	-5.37948	0				2008-11-24 14:00:00	184	26.0142	-1
2008-11-24 14:15:00	17	-5.37948	1				2008-11-24 14:15:00	184	26.0142	-1
2008-11-24 14:30:00	16	0	0				2008-11-24 14:30:00	184	26.0142	-1
2008-11-24 14:45:00	16	0	0				2008-11-24 14:45:00	184	26.0142	1
2008-11-24 15:00:00	17	-5.37948	0				2008-11-24 15:00:00	184	26.0142	0
2008-11-24 15:15:00	16	0	-1				2008-11-24 15:15:00	184	26.0142	0
2008-11-24 15:30:00	16	0	0				2008-11-24 15:30:00	184	26.0142	0
2008-11-24 15:45:00	16	0	0				2008-11-24 15:45:00	184	26.0142	0
2008-11-24 16:00:00	16	0	-1				2008-11-24 16:00:00	184	26.0142	0
2008-11-24 16:15:00	18	-10.759	2				2008-11-24 16:15:00	183	25.8357	-1
2008-11-24 16:30:00	19	-16.1384	3				2008-11-24 16:30:00	183	25.8357	-1
2008-11-24 16:45:00	19	-16.1384	3				2008-11-24 16:45:00	183	25.8357	-1
2008-11-24 17:00:00	18	-10.759	2				2008-11-24 17:00:00	184	26.0142	0
2008-11-24 17:15:00	16	0	-2				2008-11-24 17:15:00	185	26.1933	2
2008-11-24 17:30:00	16	0	-3				2008-11-24 17:30:00	185	26.1933	2
2008-11-24 17:45:00	16	0	-3				2008-11-24 17:45:00	185	26.1933	2
2008-11-24 18:00:00	16	0	X				2008-11-24 18:00:00	185	26.1933	X
2008-11-24 18:15:00	18	-10.759	X				2008-11-24 18:15:00	186	26.3729	X
2008-11-24 18:30:00	16	0	X				2008-11-24 18:30:00	186	26.3729	X
2008-11-24 18:45:00	16	0	X				2008-11-24 18:45:00	186	26.3729	X
2008-11-24 19:00:00	16	0	0				2008-11-24 19:00:00	186	26.3729	1
2008-11-24 19:15:00	16	0	-2				2008-11-24 19:15:00	186	26.3729	0
2008-11-24 19:30:00	16	0	0				2008-11-24 19:30:00	187	26.553	1
2008-11-24 19:45:00	17	-5.37948	1				2008-11-24 19:45:00	186	26.3729	0
2008-11-24 20:00:00	17	-5.37948	1				2008-11-24 20:00:00	187	26.553	1
2008-11-24 20:15:00	16	0	0				2008-11-24 20:15:00	187	26.553	1
2008-11-24 20:30:00	16	0	0				2008-11-24 20:30:00	187	26.553	0
2008-11-24 20:45:00	17	-5.37948	0				2008-11-24 20:45:00	187	26.553	1
2008-11-24 21:00:00	17	-5.37948	0				2008-11-24 21:00:00	187	26.553	0
2008-11-24 21:15:00	17	-5.37948	1				2008-11-24 21:15:00	187	26.553	0
2008-11-24 21:30:00	17	-5.37948	1				2008-11-24 21:30:00	187	26.553	0
2008-11-24 21:45:00	16	0	-1				2008-11-24 21:45:00	187	26.553	0
2008-11-24 22:00:00	17	-5.37948	0				2008-11-24 22:00:00	187	26.553	0
2008-11-24 22:15:00	16	0	-1				2008-11-24 22:15:00	187	26.553	0
2008-11-24 22:30:00	17	-5.37948	0				2008-11-24 22:30:00	187	26.553	0
2008-11-24 22:45:00	17	-5.37948	1				2008-11-24 22:45:00	186	26.3729	-1
2008-11-24 23:00:00	17	-5.37948	0				2008-11-24 23:00:00	186	26.3729	-1
2008-11-24 23:15:00	16	0	0				2008-11-24 23:15:00	186	26.3729	-1
2008-11-24 23:30:00	16	0	-1				2008-11-24 23:30:00	186	26.3729	-1
2008-11-24 23:45:00	16	0	-1				2008-11-24 23:45:00	187	26.553	1
2008-11-25	16	0	X				2008-11-25	187	26.553	X
2008-11-25 00:15:00	16	0	X				2008-11-25 00:15:00	187	26.553	X
2008-11-25 00:30:00	17	-5.37948	X				2008-11-25 00:30:00	187	26.553	X
2008-11-25 00:45:00	16	0	X				2008-11-25 00:45:00	186	26.3729	X
2008-11-25 01:00:00	16	0	0				2008-11-25 01:00:00	186	26.3729	-1
2008-11-25 01:15:00	17	-5.37948	1				2008-11-25 01:15:00	187	26.553	0
2008-11-25 01:30:00	16	0	-1				2008-11-25 01:30:00	186	26.3729	-1
2008-11-25 01:45:00	18	-10.759	2				2008-11-25 01:45:00	186	26.3729	0
2008-11-25 02:00:00	16	0	0				2008-11-25 02:00:00	185	26.1933	-1
2008-11-25 02:15:00	18	-10.759	1				2008-11-25 02:15:00	185	26.1933	-2
2008-11-25 02:30:00	19	-16.1384	3				2008-11-25 02:30:00	185	26.1933	-1
2008-11-25 02:45:00	19	-16.1384	1				2008-11-25 02:45:00	186	26.3729	0
2008-11-25 03:00:00	16	0	0				2008-11-25 03:00:00	186	26.3729	1
2008-11-25 03:15:00	16	0	-2				2008-11-25 03:15:00	186	26.3729	1
2008-11-25 03:30:00	16	0	-3				2008-11-25 03:30:00	187	26.553	2
2008-11-25 03:45:00	16	0	-3				2008-11-25 03:45:00	187	26.553	1
2008-11-25 04:00:00	16	0	0				2008-11-25 04:00:00	187	26.553	1
2008-11-25 04:15:00	16	0	0				2008-11-25 04:15:00	187	26.553	1
2008-11-25 04:30:00	16	0	0				2008-11-25 04:30:00	187	26.553	0
2008-11-25 04:45:00	16	0	0				2008-11-25 04:45:00	186	26.3729	-1
2008-11-25 05:00:00	16	0	0				2008-11-25 05:00:00	186	26.3729	-1
2008-11-25 05:15:00	16	0	0				2008-11-25 05:15:00	186	26.3729	-1
2008-11-25 05:30:00	16	0	0				2008-11-25 05:30:00	186	26.3729	-1
2008-11-25 05:45:00	16	0	0				2008-11-25 05:45:00	186	26.3729	0
2008-11-25 06:00:00	16	0	X				2008-11-25 06:00:00	186	26.3729	X
2008-11-25 06:15:00	16	0	X				2008-11-25 06:15:00	186	26.3729	X
2008-11-25 06:30:00	16	0	X				2008-11-25 06:30:00	186	26.3729	X
2008-11-25 06:45:00	16	0	X				2008-11-25 06:45:00	185	26.1933	X
2008-11-25 07:00:00	16	0	0				2008-11-25 07:00:00	185	26.1933	-1
2008-11-25 07:15:00	16	0	0				2008-11-25 07:15:00	184	26.0142	-2
2008-11-25 07:30:00	16	0	0				2008-11-25 07:30:00	185	26.1933	-1
2008-11-25 07:45:00	16	0	0				2008-11-25 07:45:00	185	26.1933	0
2008-11-25 08:00:00	16	0	0				2008-11-25 08:00:00	184	26.0142	-1
2008-11-25 08:15:00	18	-10.759	2				2008-11-25 08:15:00	185	26.1933	1
2008-11-25 08:30:00	16	0	0				2008-11-25 08:30:00	185	26.1933	0
2008-11-25 08:45:00	16	0	0				2008-11-25 08:45:00	185	26.1933	0
2008-11-25 09:00:00	18	-10.759	2				2008-11-25 09:00:00	185	26.1933	1
2008-11-25 09:15:00	16	0	-2				2008-11-25 09:15:00	185	26.1933	0
2008-11-25 09:30:00	16	0	0				2008-11-25 09:30:00	185	26.1933	0
2008-11-25 09:45:00	17	-5.37948	1				2008-11-25 09:45:00	185	26.1933	0
2008-11-25 10:00:00	17	-5.37948	-1				2008-11-25 10:00:00	185	26.1933	0
2008-11-25 10:15:00	16	0	0				2008-11-25 10:15:00	185	26.1933	0
2008-11-25 10:30:00	16	0	0				2008-11-25 10:30:00	185	26.1933	0
2008-11-25 10:45:00	16	0	-1				2008-11-25 10:45:00	183	25.8357	-2
2008-11-25 11:00:00	16	0	-1				2008-11-25 11:00:00	184	26.0142	-1
2008-11-25 11:15:00	16	0	0				2008-11-25 11:15:00	183	25.8357	-2
2008-11-25 11:30:00	16	0	0				2008-11-25 11:30:00	183	25.8357	-2
2008-11-25 11:45:00	16	0	0				2008-11-25 11:45:00	185	26.1933	2
2008-11-25 12:00:00	16	0	X				2008-11-25 12:00:00	184	26.0142	X
2008-11-25 12:15:00	17	-5.37948	X				2008-11-25 12:15:00	184	26.0142	X
2008-11-25 12:30:00	16	0	X				2008-11-25 12:30:00	185	26.1933	X
2008-11-25 12:45:00	16	0	X				2008-11-25 12:45:00	182	25.6577	X
2008-11-25 13:00:00	17	-5.37948	1				2008-11-25 13:00:00	183	25.8357	-1
2008-11-25 13:15:00	17	-5.37948	0				2008-11-25 13:15:00	184	26.0142	0
2008-11-25 13:30:00	16	0	0				2008-11-25 13:30:00	184	26.0142	-1
2008-11-25 13:45:00	16	0	0				2008-11-25 13:45:00	184	26.0142	2
2008-11-25 14:00:00	16	0	-1				2008-11-25 14:00:00	183	25.8357	0
2008-11-25 14:15:00	16	0	-1				2008-11-25 14:15:00	182	25.6577	-2
2008-11-25 14:30:00	16	0	0				2008-11-25 14:30:00	181	25.4803	-3
2008-11-25 14:45:00	16	0	0				2008-11-25 14:45:00	184	26.0142	0
2008-11-25 15:00:00	17	-5.37948	1				2008-11-25 15:00:00	184	26.0142	1
2008-11-25 15:15:00	17	-5.37948	1				2008-11-25 15:15:00	184	26.0142	2
2008-11-25 15:30:00	16	0	0				2008-11-25 15:30:00	184	26.0142	3
2008-11-25 15:45:00	17	-5.37948	1				2008-11-25 15:45:00	184	26.0142	0
2008-11-25 16:00:00	16	0	-1				2008-11-25 16:00:00	184	26.0142	0
2008-11-25 16:15:00	17	-5.37948	0				2008-11-25 16:15:00	184	26.0142	0
2008-11-25 16:30:00	17	-5.37948	1				2008-11-25 16:30:00	184	26.0142	0
2008-11-25 16:45:00	16	0	-1				2008-11-25 16:45:00	184	26.0142	0
2008-11-25 17:00:00	17	-5.37948	1				2008-11-25 17:00:00	185	26.1933	1
2008-11-25 17:15:00	16	0	-1				2008-11-25 17:15:00	185	26.1933	1
2008-11-25 17:30:00	17	-5.37948	0				2008-11-25 17:30:00	185	26.1933	1
2008-11-25 17:45:00	16	0	0				2008-11-25 17:45:00	185	26.1933	1
2008-11-25 18:00:00	16	0	X				2008-11-25 18:00:00	185	26.1933	X
2008-11-25 18:15:00	17	-5.37948	X				2008-11-25 18:15:00	185	26.1933	X
2008-11-25 18:30:00	17	-5.37948	X				2008-11-25 18:30:00	185	26.1933	X
2008-11-25 18:45:00	16	0	X				2008-11-25 18:45:00	186	26.3729	X
2008-11-25 19:00:00	16	0	0				2008-11-25 19:00:00	185	26.1933	0
2008-11-25 19:15:00	16	0	-1				2008-11-25 19:15:00	186	26.3729	1
2008-11-25 19:30:00	16	0	-1				2008-11-25 19:30:00	186	26.3729	1
2008-11-25 19:45:00	17	-5.37948	1				2008-11-25 19:45:00	186	26.3729	0
2008-11-25 20:00:00	16	0	0				2008-11-25 20:00:00	186	26.3729	1
2008-11-25 20:15:00	17	-5.37948	1				2008-11-25 20:15:00	186	26.3729	0
2008-11-25 20:30:00	16	0	0				2008-11-25 20:30:00	186	26.3729	0
2008-11-25 20:45:00	16	0	-1				2008-11-25 20:45:00	186	26.3729	0
2008-11-25 21:00:00	16	0	0				2008-11-25 21:00:00	186	26.3729	0
2008-11-25 21:15:00	16	0	-1				2008-11-25 21:15:00	186	26.3729	0
2008-11-25 21:30:00	16	0	0				2008-11-25 21:30:00	186	26.3729	0
2008-11-25 21:45:00	17	-5.37948	1				2008-11-25 21:45:00	186	26.3729	0
2008-11-25 22:00:00	16	0	0				2008-11-25 22:00:00	186	26.3729	0
2008-11-25 22:15:00	17	-5.37948	1				2008-11-25 22:15:00	186	26.3729	0
2008-11-25 22:30:00	17	-5.37948	1				2008-11-25 22:30:00	186	26.3729	0
2008-11-25 22:45:00	17	-5.37948	0				2008-11-25 22:45:00	186	26.3729	0
2008-11-25 23:00:00	17	-5.37948	1				2008-11-25 23:00:00	186	26.3729	0
2008-11-25 23:15:00	16	0	-1				2008-11-25 23:15:00	186	26.3729	0
2008-11-25 23:30:00	16	0	-1				2008-11-25 23:30:00	186	26.3729	0
2008-11-25 23:45:00	16	0	-1				2008-11-25 23:45:00	186	26.3729	0
2008-11-26	17	-5.37948	X				2008-11-26	186	26.3729	X
2008-11-26 00:15:00	16	0	X				2008-11-26 00:15:00	185	26.1933	X
2008-11-26 00:30:00	17	-5.37948	X				2008-11-26 00:30:00	185	26.1933	X
2008-11-26 00:45:00	17	-5.37948	X				2008-11-26 00:45:00	185	26.1933	X
2008-11-26 01:00:00	16	0	-1				2008-11-26 01:00:00	185	26.1933	-1
2008-11-26 01:15:00	19	-16.1384	3				2008-11-26 01:15:00	185	26.1933	0
2008-11-26 01:30:00	17	-5.37948	0				2008-11-26 01:30:00	184	26.0142	-1
2008-11-26 01:45:00	18	-10.759	1				2008-11-26 01:45:00	184	26.0142	-1
2008-11-26 02:00:00	16	0	0				2008-11-26 02:00:00	184	26.0142	-1
2008-11-26 02:15:00	16	0	-3				2008-11-26 02:15:00	184	26.0142	-1
2008-11-26 02:30:00	16	0	-1				2008-11-26 02:30:00	184	26.0142	0
2008-11-26 02:45:00	16	0	-2				2008-11-26 02:45:00	184	26.0142	0
2008-11-26 03:00:00	16	0	0				2008-11-26 03:00:00	184	26.0142	0
2008-11-26 03:15:00	20	-21.5179	4				2008-11-26 03:15:00	184	26.0142	0
2008-11-26 03:30:00	16	0	0				2008-11-26 03:30:00	184	26.0142	0
2008-11-26 03:45:00	16	0	0				2008-11-26 03:45:00	184	26.0142	0
2008-11-26 04:00:00	19	-16.1384	3				2008-11-26 04:00:00	185	26.1933	1
2008-11-26 04:15:00	17	-5.37948	-3				2008-11-26 04:15:00	184	26.0142	0
2008-11-26 04:30:00	16	0	0				2008-11-26 04:30:00	185	26.1933	1
2008-11-26 04:45:00	16	0	0				2008-11-26 04:45:00	185	26.1933	1
2008-11-26 05:00:00	16	0	-3				2008-11-26 05:00:00	185	26.1933	0
2008-11-26 05:15:00	16	0	-1				2008-11-26 05:15:00	185	26.1933	1
2008-11-26 05:30:00	16	0	0				2008-11-26 05:30:00	185	26.1933	0
2008-11-26 05:45:00	16	0	0				2008-11-26 05:45:00	185	26.1933	0
2008-11-26 06:00:00	16	0	X				2008-11-26 06:00:00	185	26.1933	X
2008-11-26 06:15:00	16	0	X				2008-11-26 06:15:00	185	26.1933	X
2008-11-26 06:30:00	16	0	X				2008-11-26 06:30:00	185	26.1933	X
2008-11-26 06:45:00	16	0	X				2008-11-26 06:45:00	185	26.1933	X
2008-11-26 07:00:00	16	0	0				2008-11-26 07:00:00	185	26.1933	0
2008-11-26 07:15:00	17	-5.37948	1				2008-11-26 07:15:00	185	26.1933	0
2008-11-26 07:30:00	17	-5.37948	1				2008-11-26 07:30:00	185	26.1933	0
2008-11-26 07:45:00	16	0	0				2008-11-26 07:45:00	185	26.1933	0
2008-11-26 08:00:00	17	-5.37948	1				2008-11-26 08:00:00	185	26.1933	0
2008-11-26 08:15:00	18	-10.759	1				2008-11-26 08:15:00	185	26.1933	0
2008-11-26 08:30:00	16	0	-1				2008-11-26 08:30:00	184	26.0142	-1
2008-11-26 08:45:00	16	0	0				2008-11-26 08:45:00	184	26.0142	-1
2008-11-26 09:00:00	16	0	-1				2008-11-26 09:00:00	184	26.0142	-1
2008-11-26 09:15:00	16	0	-2				2008-11-26 09:15:00	184	26.0142	-1
2008-11-26 09:30:00	17	-5.37948	1				2008-11-26 09:30:00	184	26.0142	0
2008-11-26 09:45:00	16	0	0				2008-11-26 09:45:00	184	26.0142	0
2008-11-26 10:00:00	16	0	0				2008-11-26 10:00:00	184	26.0142	0
2008-11-26 10:15:00	19	-16.1384	3				2008-11-26 10:15:00	184	26.0142	0
2008-11-26 10:30:00	16	0	-1				2008-11-26 10:30:00	184	26.0142	0
2008-11-26 10:45:00	16	0	0				2008-11-26 10:45:00	184	26.0142	0
2008-11-26 11:00:00	18	-10.759	2				2008-11-26 11:00:00	184	26.0142	0
2008-11-26 11:15:00	16	0	-3				2008-11-26 11:15:00	184	26.0142	0
2008-11-26 11:30:00	16	0	0				2008-11-26 11:30:00	184	26.0142	0
2008-11-26 11:45:00	16	0	0				2008-11-26 11:45:00	184	26.0142	0
2008-11-26 12:00:00	16	0	X				2008-11-26 12:00:00	184	26.0142	X
2008-11-26 12:15:00	16	0	X				2008-11-26 12:15:00	184	26.0142	X
2008-11-26 12:30:00	19	-16.1384	X				2008-11-26 12:30:00	184	26.0142	X
2008-11-26 12:45:00	17	-5.37948	X				2008-11-26 12:45:00	183	25.8357	X
2008-11-26 13:00:00	16	0	0				2008-11-26 13:00:00	183	25.8357	-1
2008-11-26 13:15:00	19	-16.1384	3				2008-11-26 13:15:00	183	25.8357	-1
2008-11-26 13:30:00	19	-16.1384	0				2008-11-26 13:30:00	183	25.8357	-1
2008-11-26 13:45:00	18	-10.759	1				2008-11-26 13:45:00	184	26.0142	1
2008-11-26 14:00:00	18	-10.759	2				2008-11-26 14:00:00	184	26.0142	1
2008-11-26 14:15:00	16	0	-3				2008-11-26 14:15:00	184	26.0142	1
2008-11-26 14:30:00	16	0	-3				2008-11-26 14:30:00	184	26.0142	1
2008-11-26 14:45:00	18	-10.759	0				2008-11-26 14:45:00	184	26.0142	0
2008-11-26 15:00:00	16	0	-2				2008-11-26 15:00:00	184	26.0142	0
2008-11-26 15:15:00	16	0	0				2008-11-26 15:15:00	184	26.0142	0
2008-11-26 15:30:00	16	0	0				2008-11-26 15:30:00	184	26.0142	0
2008-11-26 15:45:00	17	-5.37948	-1				2008-11-26 15:45:00	184	26.0142	0
2008-11-26 16:00:00	17	-5.37948	1				2008-11-26 16:00:00	184	26.0142	0
2008-11-26 16:15:00	16	0	0				2008-11-26 16:15:00	184	26.0142	0
2008-11-26 16:30:00	16	0	0				2008-11-26 16:30:00	184	26.0142	0
2008-11-26 16:45:00	16	0	-1				2008-11-26 16:45:00	184	26.0142	0
2008-11-26 17:00:00	16	0	-1				2008-11-26 17:00:00	183	25.8357	-1
2008-11-26 17:15:00	16	0	0				2008-11-26 17:15:00	184	26.0142	0
2008-11-26 17:30:00	16	0	0				2008-11-26 17:30:00	184	26.0142	0
2008-11-26 17:45:00	16	0	0				2008-11-26 17:45:00	184	26.0142	0
2008-11-26 18:00:00	16	0	X				2008-11-26 18:00:00	184	26.0142	X
2008-11-26 18:15:00	18	-10.759	X				2008-11-26 18:15:00	184	26.0142	X
2008-11-26 18:30:00	16	0	X				2008-11-26 18:30:00	184	26.0142	X
2008-11-26 18:45:00	16	0	X				2008-11-26 18:45:00	184	26.0142	X
2008-11-26 19:00:00	16	0	0				2008-11-26 19:00:00	185	26.1933	1
2008-11-26 19:15:00	16	0	-2				2008-11-26 19:15:00	184	26.0142	0
2008-11-26 19:30:00	16	0	0				2008-11-26 19:30:00	185	26.1933	1
2008-11-26 19:45:00	16	0	0				2008-11-26 19:45:00	184	26.0142	0
2008-11-26 20:00:00	17	-5.37948	1				2008-11-26 20:00:00	184	26.0142	-1
2008-11-26 20:15:00	16	0	0				2008-11-26 20:15:00	185	26.1933	1
2008-11-26 20:30:00	16	0	0				2008-11-26 20:30:00	185	26.1933	0
2008-11-26 20:45:00	16	0	0				2008-11-26 20:45:00	185	26.1933	1
2008-11-26 21:00:00	16	0	-1				2008-11-26 21:00:00	185	26.1933	1
2008-11-26 21:15:00	17	-5.37948	1				2008-11-26 21:15:00	184	26.0142	-1
2008-11-26 21:30:00	16	0	0				2008-11-26 21:30:00	186	26.3729	1
2008-11-26 21:45:00	16	0	0				2008-11-26 21:45:00	186	26.3729	1
2008-11-26 22:00:00	16	0	0				2008-11-26 22:00:00	185	26.1933	0
2008-11-26 22:15:00	16	0	-1				2008-11-26 22:15:00	186	26.3729	2
2008-11-26 22:30:00	18	-10.759	2				2008-11-26 22:30:00	184	26.0142	-2
2008-11-26 22:45:00	16	0	0				2008-11-26 22:45:00	186	26.3729	0
2008-11-26 23:00:00	16	0	0				2008-11-26 23:00:00	187	26.553	2
2008-11-26 23:15:00	16	0	0				2008-11-26 23:15:00	184	26.0142	-2
2008-11-26 23:30:00	19	-16.1384	1				2008-11-26 23:30:00	183	25.8357	-1
2008-11-26 23:45:00	19	-16.1384	3				2008-11-26 23:45:00	183	25.8357	-3
2008-11-27	16	0	X				2008-11-27	185	26.1933	X
2008-11-27 00:15:00	19	-16.1384	X				2008-11-27 00:15:00	184	26.0142	X
2008-11-27 00:30:00	16	0	X				2008-11-27 00:30:00	186	26.3729	X
2008-11-27 00:45:00	18	-10.759	X				2008-11-27 00:45:00	185	26.1933	X
2008-11-27 01:00:00	16	0	0				2008-11-27 01:00:00	187	26.553	2
2008-11-27 01:15:00	16	0	-3				2008-11-27 01:15:00	187	26.553	3
2008-11-27 01:30:00	16	0	0				2008-11-27 01:30:00	187	26.553	1
2008-11-27 01:45:00	16	0	-2				2008-11-27 01:45:00	187	26.553	2
2008-11-27 02:00:00	16	0	0				2008-11-27 02:00:00	187	26.553	0
2008-11-27 02:15:00	17	-5.37948	1				2008-11-27 02:15:00	187	26.553	0
2008-11-27 02:30:00	16	0	0				2008-11-27 02:30:00	187	26.553	0
2008-11-27 02:45:00	16	0	0				2008-11-27 02:45:00	187	26.553	0
2008-11-27 03:00:00	16	0	0				2008-11-27 03:00:00	187	26.553	0
2008-11-27 03:15:00	16	0	-1				2008-11-27 03:15:00	186	26.3729	-1
2008-11-27 03:30:00	16	0	0				2008-11-27 03:30:00	187	26.553	0
2008-11-27 03:45:00	16	0	0				2008-11-27 03:45:00	186	26.3729	-1
2008-11-27 04:00:00	16	0	0				2008-11-27 04:00:00	186	26.3729	-1
2008-11-27 04:15:00	16	0	0				2008-11-27 04:15:00	186	26.3729	0
2008-11-27 04:30:00	18	-10.759	2				2008-11-27 04:30:00	185	26.1933	-2
2008-11-27 04:45:00	16	0	0				2008-11-27 04:45:00	185	26.1933	-1
2008-11-27 05:00:00	16	0	0				2008-11-27 05:00:00	185	26.1933	-1
2008-11-27 05:15:00	16	0	0				2008-11-27 05:15:00	184	26.0142	-2
2008-11-27 05:30:00	16	0	-2				2008-11-27 05:30:00	185	26.1933	0
2008-11-27 05:45:00	16	0	0				2008-11-27 05:45:00	184	26.0142	-1
2008-11-27 06:00:00	16	0	X				2008-11-27 06:00:00	183	25.8357	X
2008-11-27 06:15:00	16	0	X				2008-11-27 06:15:00	184	26.0142	X
2008-11-27 06:30:00	18	-10.759	X				2008-11-27 06:30:00	184	26.0142	X
2008-11-27 06:45:00	16	0	X				2008-11-27 06:45:00	184	26.0142	X
2008-11-27 07:00:00	16	0	0				2008-11-27 07:00:00	184	26.0142	1
2008-11-27 07:15:00	19	-16.1384	3				2008-11-27 07:15:00	184	26.0142	0
2008-11-27 07:30:00	18	-10.759	0				2008-11-27 07:30:00	184	26.0142	0
2008-11-27 07:45:00	19	-16.1384	3				2008-11-27 07:45:00	184	26.0142	0
2008-11-27 08:00:00	17	-5.37948	1				2008-11-27 08:00:00	184	26.0142	0
2008-11-27 08:15:00	16	0	-3				2008-11-27 08:15:00	184	26.0142	0
2008-11-27 08:30:00	19	-16.1384	1				2008-11-27 08:30:00	184	26.0142	0
2008-11-27 08:45:00	18	-10.759	-1				2008-11-27 08:45:00	184	26.0142	0
2008-11-27 09:00:00	16	0	-1				2008-11-27 09:00:00	184	26.0142	0
2008-11-27 09:15:00	16	0	0				2008-11-27 09:15:00	184	26.0142	0
2008-11-27 09:30:00	16	0	-3				2008-11-27 09:30:00	184	26.0142	0
2008-11-27 09:45:00	16	0	-2				2008-11-27 09:45:00	184	26.0142	0
2008-11-27 10:00:00	18	-10.759	2				2008-11-27 10:00:00	184	26.0142	0
2008-11-27 10:15:00	16	0	0				2008-11-27 10:15:00	184	26.0142	0
2008-11-27 10:30:00	16	0	0				2008-11-27 10:30:00	184	26.0142	0
2008-11-27 10:45:00	19	-16.1384	3				2008-11-27 10:45:00	185	26.1933	1
2008-11-27 11:00:00	16	0	-2				2008-11-27 11:00:00	185	26.1933	1
2008-11-27 11:15:00	16	0	0				2008-11-27 11:15:00	185	26.1933	1
2008-11-27 11:30:00	16	0	0				2008-11-27 11:30:00	184	26.0142	0
2008-11-27 11:45:00	16	0	-3				2008-11-27 11:45:00	184	26.0142	-1
2008-11-27 12:00:00	17	-5.37948	X				2008-11-27 12:00:00	184	26.0142	X
2008-11-27 12:15:00	16	0	X				2008-11-27 12:15:00	184	26.0142	X
2008-11-27 12:30:00	16	0	X				2008-11-27 12:30:00	184	26.0142	X
2008-11-27 12:45:00	16	0	X				2008-11-27 12:45:00	184	26.0142	X
2008-11-27 13:00:00	16	0	-1				2008-11-27 13:00:00	185	26.1933	1
2008-11-27 13:15:00	18	-10.759	2				2008-11-27 13:15:00	184	26.0142	0
2008-11-27 13:30:00	17	-5.37948	1				2008-11-27 13:30:00	184	26.0142	0
2008-11-27 13:45:00	18	-10.759	2				2008-11-27 13:45:00	184	26.0142	0
2008-11-27 14:00:00	16	0	0				2008-11-27 14:00:00	183	25.8357	-2
2008-11-27 14:15:00	16	0	-2				2008-11-27 14:15:00	183	25.8357	-1
2008-11-27 14:30:00	18	-10.759	1				2008-11-27 14:30:00	183	25.8357	-1
2008-11-27 14:45:00	18	-10.759	0				2008-11-27 14:45:00	183	25.8357	-1
2008-11-27 15:00:00	16	0	0				2008-11-27 15:00:00	183	25.8357	0
2008-11-27 15:15:00	16	0	0				2008-11-27 15:15:00	184	26.0142	1
2008-11-27 15:30:00	16	0	-2				2008-11-27 15:30:00	184	26.0142	1
2008-11-27 15:45:00	16	0	-2				2008-11-27 15:45:00	184	26.0142	1
2008-11-27 16:00:00	17	-5.37948	1				2008-11-27 16:00:00	184	26.0142	1
2008-11-27 16:15:00	16	0	0				2008-11-27 16:15:00	184	26.0142	0
2008-11-27 16:30:00	16	0	0				2008-11-27 16:30:00	184	26.0142	0
2008-11-27 16:45:00	17	-5.37948	1				2008-11-27 16:45:00	184	26.0142	0
2008-11-27 17:00:00	17	-5.37948	0				2008-11-27 17:00:00	185	26.1933	1
2008-11-27 17:15:00	19	-16.1384	3				2008-11-27 17:15:00	184	26.0142	0
2008-11-27 17:30:00	16	0	0				2008-11-27 17:30:00	184	26.0142	0
2008-11-27 17:45:00	16	0	-1				2008-11-27 17:45:00	184	26.0142	0
2008-11-27 18:00:00	16	0	X				2008-11-27 18:00:00	184	26.0142	X
2008-11-27 18:15:00	16	0	X				2008-11-27 18:15:00	184	26.0142	X
2008-11-27 18:30:00	19	-16.1384	X				2008-11-27 18:30:00	185	26.1933	X
2008-11-27 18:45:00	16	0	X				2008-11-27 18:45:00	185	26.1933	X
2008-11-27 19:00:00	16	0	0				2008-11-27 19:00:00	185	26.1933	1
2008-11-27 19:15:00	17	-5.37948	1				2008-11-27 19:15:00	184	26.0142	0
2008-11-27 19:30:00	17	-5.37948	-2				2008-11-27 19:30:00	184	26.0142	-1
2008-11-27 19:45:00	17	-5.37948	1				2008-11-27 19:45:00	184	26.0142	-1
2008-11-27 20:00:00	16	0	0				2008-11-27 20:00:00	184	26.0142	-1
2008-11-27 20:15:00	16	0	-1				2008-11-27 20:15:00	185	26.1933	1
2008-11-27 20:30:00	16	0	-1				2008-11-27 20:30:00	184	26.0142	0
2008-11-27 20:45:00	16	0	-1				2008-11-27 20:45:00	185	26.1933	1
2008-11-27 21:00:00	16	0	0				2008-11-27 21:00:00	185	26.1933	1
2008-11-27 21:15:00	16	0	0				2008-11-27 21:15:00	184	26.0142	-1
2008-11-27 21:30:00	16	0	0				2008-11-27 21:30:00	184	26.0142	0
2008-11-27 21:45:00	16	0	0				2008-11-27 21:45:00	185	26.1933	0
2008-11-27 22:00:00	16	0	0				2008-11-27 22:00:00	184	26.0142	-1
2008-11-27 22:15:00	16	0	0				2008-11-27 22:15:00	184	26.0142	0
2008-11-27 22:30:00	16	0	0				2008-11-27 22:30:00	185	26.1933	1
2008-11-27 22:45:00	16	0	0				2008-11-27 22:45:00	186	26.3729	1
2008-11-27 23:00:00	16	0	0				2008-11-27 23:00:00	186	26.3729	2
2008-11-27 23:15:00	16	0	0				2008-11-27 23:15:00	186	26.3729	2
2008-11-27 23:30:00	18	-10.759	2				2008-11-27 23:30:00	185	26.1933	0
2008-11-27 23:45:00	19	-16.1384	3				2008-11-27 23:45:00	182	25.6577	-4
2008-11-28	16	0	X				2008-11-28	186	26.3729	X
2008-11-28 00:15:00	19	-16.1384	X				2008-11-28 00:15:00	183	25.8357	X
2008-11-28 00:30:00	19	-16.1384	X				2008-11-28 00:30:00	183	25.8357	X
2008-11-28 00:45:00	16	0	X				2008-11-28 00:45:00	185	26.1933	X
2008-11-28 01:00:00	18	-10.759	2				2008-11-28 01:00:00	185	26.1933	-1
2008-11-28 01:15:00	19	-16.1384	0				2008-11-28 01:15:00	184	26.0142	1
2008-11-28 01:30:00	19	-16.1384	0				2008-11-28 01:30:00	184	26.0142	1
2008-11-28 01:45:00	16	0	0				2008-11-28 01:45:00	185	26.1933	0
2008-11-28 02:00:00	19	-16.1384	1				2008-11-28 02:00:00	184	26.0142	-1
2008-11-28 02:15:00	16	0	-3				2008-11-28 02:15:00	185	26.1933	1
2008-11-28 02:30:00	18	-10.759	-1				2008-11-28 02:30:00	185	26.1933	1
2008-11-28 02:45:00	16	0	0				2008-11-28 02:45:00	185	26.1933	0
2008-11-28 03:00:00	16	0	-3				2008-11-28 03:00:00	185	26.1933	1
2008-11-28 03:15:00	18	-10.759	2				2008-11-28 03:15:00	185	26.1933	0
2008-11-28 03:30:00	16	0	-2				2008-11-28 03:30:00	185	26.1933	0
2008-11-28 03:45:00	16	0	0				2008-11-28 03:45:00	185	26.1933	0
2008-11-28 04:00:00	16	0	0				2008-11-28 04:00:00	185	26.1933	0
2008-11-28 04:15:00	16	0	-2				2008-11-28 04:15:00	185	26.1933	0
2008-11-28 04:30:00	16	0	0				2008-11-28 04:30:00	184	26.0142	-1
2008-11-28 04:45:00	16	0	0				2008-11-28 04:45:00	184	26.0142	-1
2008-11-28 05:00:00	16	0	0				2008-11-28 05:00:00	183	25.8357	-2
2008-11-28 05:15:00	16	0	0				2008-11-28 05:15:00	184	26.0142	-1
2008-11-28 05:30:00	16	0	0				2008-11-28 05:30:00	185	26.1933	1
2008-11-28 05:45:00	16	0	0				2008-11-28 05:45:00	184	26.0142	0
2008-11-28 06:00:00	16	0	X				2008-11-28 06:00:00	185	26.1933	X
2008-11-28 06:15:00	16	0	X				2008-11-28 06:15:00	183	25.8357	X
2008-11-28 06:30:00	16	0	X				2008-11-28 06:30:00	183	25.8357	X
2008-11-28 06:45:00	16	0	X				2008-11-28 06:45:00	184	26.0142	X
2008-11-28 07:00:00	16	0	0				2008-11-28 07:00:00	183	25.8357	-2
2008-11-28 07:15:00	16	0	0				2008-11-28 07:15:00	183	25.8357	0
2008-11-28 07:30:00	16	0	0				2008-11-28 07:30:00	183	25.8357	0
2008-11-28 07:45:00	16	0	0				2008-11-28 07:45:00	182	25.6577	-2
2008-11-28 08:00:00	16	0	0				2008-11-28 08:00:00	183	25.8357	0
2008-11-28 08:15:00	16	0	0				2008-11-28 08:15:00	183	25.8357	0
2008-11-28 08:30:00	16	0	0				2008-11-28 08:30:00	182	25.6577	-1
2008-11-28 08:45:00	16	0	0				2008-11-28 08:45:00	182	25.6577	0
2008-11-28 09:00:00	16	0	0				2008-11-28 09:00:00	183	25.8357	0
2008-11-28 09:15:00	16	0	0				2008-11-28 09:15:00	181	25.4803	-2
2008-11-28 09:30:00	16	0	0				2008-11-28 09:30:00	184	26.0142	2
2008-11-28 09:45:00	16	0	0				2008-11-28 09:45:00	183	25.8357	1
2008-11-28 10:00:00	16	0	0				2008-11-28 10:00:00	183	25.8357	0
2008-11-28 10:15:00	16	0	0				2008-11-28 10:15:00	182	25.6577	1
2008-11-28 10:30:00	16	0	0				2008-11-28 10:30:00	183	25.8357	-1
2008-11-28 10:45:00	16	0	0				2008-11-28 10:45:00	182	25.6577	-1
2008-11-28 11:00:00	16	0	0				2008-11-28 11:00:00	182	25.6577	-1
2008-11-28 11:15:00	16	0	0				2008-11-28 11:15:00	182	25.6577	0
2008-11-28 11:30:00	17	-5.37948	1				2008-11-28 11:30:00	181	25.4803	-2
2008-11-28 11:45:00	18	-10.759	2				2008-11-28 11:45:00	183	25.8357	1
2008-11-28 12:00:00	16	0	X				2008-11-28 12:00:00	183	25.8357	X
2008-11-28 12:15:00	16	0	X				2008-11-28 12:15:00	182	25.6577	X
2008-11-28 12:30:00	17	-5.37948	X				2008-11-28 12:30:00	183	25.8357	X
2008-11-28 12:45:00	16	0	X				2008-11-28 12:45:00	183	25.8357	X
2008-11-28 13:00:00	16	0	0				2008-11-28 13:00:00	182	25.6577	-1
2008-11-28 13:15:00	17	-5.37948	1				2008-11-28 13:15:00	182	25.6577	0
2008-11-28 13:30:00	16	0	-1				2008-11-28 13:30:00	182	25.6577	-1
2008-11-28 13:45:00	19	-16.1384	3				2008-11-28 13:45:00	182	25.6577	-1
2008-11-28 14:00:00	16	0	0				2008-11-28 14:00:00	182	25.6577	0
2008-11-28 14:15:00	17	-5.37948	0				2008-11-28 14:15:00	181	25.4803	-1
2008-11-28 14:30:00	16	0	0				2008-11-28 14:30:00	183	25.8357	1
2008-11-28 14:45:00	16	0	-3				2008-11-28 14:45:00	182	25.6577	0
2008-11-28 15:00:00	17	-5.37948	1				2008-11-28 15:00:00	181	25.4803	-1
2008-11-28 15:15:00	17	-5.37948	0				2008-11-28 15:15:00	179	25.127	-2
2008-11-28 15:30:00	17	-5.37948	1				2008-11-28 15:30:00	180	25.3034	-3
2008-11-28 15:45:00	17	-5.37948	1				2008-11-28 15:45:00	181	25.4803	-1
2008-11-28 16:00:00	17	-5.37948	0				2008-11-28 16:00:00	181	25.4803	0
2008-11-28 16:15:00	16	0	-1				2008-11-28 16:15:00	182	25.6577	3
2008-11-28 16:30:00	17	-5.37948	0				2008-11-28 16:30:00	181	25.4803	1
2008-11-28 16:45:00	16	0	-1				2008-11-28 16:45:00	182	25.6577	1
2008-11-28 17:00:00	16	0	-1				2008-11-28 17:00:00	182	25.6577	1
2008-11-28 17:15:00	17	-5.37948	1				2008-11-28 17:15:00	181	25.4803	-1
2008-11-28 17:30:00	19	-16.1384	2				2008-11-28 17:30:00	182	25.6577	1
2008-11-28 17:45:00	20	-21.5179	4				2008-11-28 17:45:00	183	25.8357	1
2008-11-28 18:00:00	20	-21.5179	X				2008-11-28 18:00:00	184	26.0142	X
2008-11-28 18:15:00	20	-21.5179	X				2008-11-28 18:15:00	183	25.8357	X
2008-11-28 18:30:00	16	0	X				2008-11-28 18:30:00	184	26.0142	X
2008-11-28 18:45:00	16	0	X				2008-11-28 18:45:00	182	25.6577	X
2008-11-28 19:00:00	16	0	-4				2008-11-28 19:00:00	183	25.8357	-1
2008-11-28 19:15:00	16	0	-4				2008-11-28 19:15:00	182	25.6577	-1
2008-11-28 19:30:00	16	0	0				2008-11-28 19:30:00	182	25.6577	-2
2008-11-28 19:45:00	16	0	0				2008-11-28 19:45:00	183	25.8357	1
2008-11-28 20:00:00	16	0	0				2008-11-28 20:00:00	183	25.8357	0
2008-11-28 20:15:00	16	0	0				2008-11-28 20:15:00	182	25.6577	0
2008-11-28 20:30:00	16	0	0				2008-11-28 20:30:00	183	25.8357	1
2008-11-28 20:45:00	16	0	0				2008-11-28 20:45:00	183	25.8357	0
2008-11-28 21:00:00	16	0	0				2008-11-28 21:00:00	182	25.6577	-1
2008-11-28 21:15:00	16	0	0				2008-11-28 21:15:00	182	25.6577	0
2008-11-28 21:30:00	17	-5.37948	1				2008-11-28 21:30:00	181	25.4803	-2
2008-11-28 21:45:00	16	0	0				2008-11-28 21:45:00	183	25.8357	0
2008-11-28 22:00:00	16	0	0				2008-11-28 22:00:00	181	25.4803	-1
2008-11-28 22:15:00	16	0	0				2008-11-28 22:15:00	181	25.4803	-1
2008-11-28 22:30:00	16	0	-1				2008-11-28 22:30:00	182	25.6577	1
2008-11-28 22:45:00	16	0	0				2008-11-28 22:45:00	181	25.4803	-2
2008-11-28 23:00:00	16	0	0				2008-11-28 23:00:00	182	25.6577	1
2008-11-28 23:15:00	16	0	0				2008-11-28 23:15:00	181	25.4803	0
2008-11-28 23:30:00	16	0	0				2008-11-28 23:30:00	183	25.8357	1
2008-11-28 23:45:00	16	0	0				2008-11-28 23:45:00	183	25.8357	2
2008-11-29	19	-16.1384	X				2008-11-29	180	25.3034	X
2008-11-29 00:15:00	16	0	X				2008-11-29 00:15:00	183	25.8357	X
2008-11-29 00:30:00	18	-10.759	X				2008-11-29 00:30:00	183	25.8357	X
2008-11-29 00:45:00	16	0	X				2008-11-29 00:45:00	183	25.8357	X
2008-11-29 01:00:00	19	-16.1384	0				2008-11-29 01:00:00	183	25.8357	3
2008-11-29 01:15:00	16	0	0				2008-11-29 01:15:00	184	26.0142	1
2008-11-29 01:30:00	17	-5.37948	-1				2008-11-29 01:30:00	184	26.0142	1
2008-11-29 01:45:00	18	-10.759	2				2008-11-29 01:45:00	184	26.0142	1
2008-11-29 02:00:00	16	0	-3				2008-11-29 02:00:00	184	26.0142	1
2008-11-29 02:15:00	16	0	0				2008-11-29 02:15:00	184	26.0142	0
2008-11-29 02:30:00	18	-10.759	1				2008-11-29 02:30:00	184	26.0142	0
2008-11-29 02:45:00	17	-5.37948	-1				2008-11-29 02:45:00	184	26.0142	0
2008-11-29 03:00:00	16	0	0				2008-11-29 03:00:00	184	26.0142	0
2008-11-29 03:15:00	19	-16.1384	3				2008-11-29 03:15:00	184	26.0142	0
2008-11-29 03:30:00	16	0	-2				2008-11-29 03:30:00	184	26.0142	0
2008-11-29 03:45:00	17	-5.37948	0				2008-11-29 03:45:00	181	25.4803	-3
2008-11-29 04:00:00	17	-5.37948	1				2008-11-29 04:00:00	181	25.4803	-3
2008-11-29 04:15:00	17	-5.37948	-2				2008-11-29 04:15:00	181	25.4803	-3
2008-11-29 04:30:00	17	-5.37948	1				2008-11-29 04:30:00	180	25.3034	-4
2008-11-29 04:45:00	17	-5.37948	0				2008-11-29 04:45:00	181	25.4803	0
2008-11-29 05:00:00	17	-5.37948	0				2008-11-29 05:00:00	180	25.3034	-1
2008-11-29 05:15:00	17	-5.37948	0				2008-11-29 05:15:00	181	25.4803	0
2008-11-29 05:30:00	17	-5.37948	0				2008-11-29 05:30:00	181	25.4803	1
2008-11-29 05:45:00	16	0	-1				2008-11-29 05:45:00	183	25.8357	2
2008-11-29 06:00:00	17	-5.37948	X				2008-11-29 06:00:00	181	25.4803	X
2008-11-29 06:15:00	17	-5.37948	X				2008-11-29 06:15:00	180	25.3034	X
2008-11-29 06:30:00	16	0	X				2008-11-29 06:30:00	183	25.8357	X
2008-11-29 06:45:00	16	0	X				2008-11-29 06:45:00	183	25.8357	X
2008-11-29 07:00:00	16	0	-1				2008-11-29 07:00:00	184	26.0142	3
2008-11-29 07:15:00	19	-16.1384	2				2008-11-29 07:15:00	184	26.0142	4
2008-11-29 07:30:00	16	0	0				2008-11-29 07:30:00	184	26.0142	1
2008-11-29 07:45:00	16	0	0				2008-11-29 07:45:00	183	25.8357	0
2008-11-29 08:00:00	16	0	0				2008-11-29 08:00:00	184	26.0142	0
2008-11-29 08:15:00	18	-10.759	-1				2008-11-29 08:15:00	183	25.8357	-1
2008-11-29 08:30:00	19	-16.1384	3				2008-11-29 08:30:00	183	25.8357	-1
2008-11-29 08:45:00	16	0	0				2008-11-29 08:45:00	183	25.8357	0
2008-11-29 09:00:00	16	0	0				2008-11-29 09:00:00	183	25.8357	-1
2008-11-29 09:15:00	16	0	-2				2008-11-29 09:15:00	183	25.8357	0
2008-11-29 09:30:00	16	0	-3				2008-11-29 09:30:00	183	25.8357	0
2008-11-29 09:45:00	17	-5.37948	1				2008-11-29 09:45:00	183	25.8357	0
2008-11-29 10:00:00	16	0	0				2008-11-29 10:00:00	183	25.8357	0
2008-11-29 10:15:00	16	0	0				2008-11-29 10:15:00	183	25.8357	0
2008-11-29 10:30:00	16	0	0				2008-11-29 10:30:00	182	25.6577	-1
2008-11-29 10:45:00	16	0	-1				2008-11-29 10:45:00	183	25.8357	0
2008-11-29 11:00:00	16	0	0				2008-11-29 11:00:00	183	25.8357	0
2008-11-29 11:15:00	19	-16.1384	3				2008-11-29 11:15:00	183	25.8357	0
2008-11-29 11:30:00	19	-16.1384	3				2008-11-29 11:30:00	183	25.8357	1
2008-11-29 11:45:00	16	0	0				2008-11-29 11:45:00	183	25.8357	0
2008-11-29 12:00:00	16	0	X				2008-11-29 12:00:00	183	25.8357	X
2008-11-29 12:15:00	18	-10.759	X				2008-11-29 12:15:00	183	25.8357	X
2008-11-29 12:30:00	19	-16.1384	X				2008-11-29 12:30:00	183	25.8357	X
2008-11-29 12:45:00	19	-16.1384	X				2008-11-29 12:45:00	183	25.8357	X
2008-11-29 13:00:00	16	0	0				2008-11-29 13:00:00	183	25.8357	0
2008-11-29 13:15:00	16	0	-2				2008-11-29 13:15:00	183	25.8357	0
2008-11-29 13:30:00	16	0	-3				2008-11-29 13:30:00	183	25.8357	0
2008-11-29 13:45:00	16	0	-3				2008-11-29 13:45:00	182	25.6577	-1
2008-11-29 14:00:00	16	0	0				2008-11-29 14:00:00	182	25.6577	-1
2008-11-29 14:15:00	16	0	0				2008-11-29 14:15:00	182	25.6577	-1
2008-11-29 14:30:00	16	0	0				2008-11-29 14:30:00	182	25.6577	-1
2008-11-29 14:45:00	16	0	0				2008-11-29 14:45:00	183	25.8357	1
2008-11-29 15:00:00	16	0	0				2008-11-29 15:00:00	183	25.8357	1
2008-11-29 15:15:00	16	0	0				2008-11-29 15:15:00	182	25.6577	0
2008-11-29 15:30:00	16	0	0				2008-11-29 15:30:00	182	25.6577	0
2008-11-29 15:45:00	19	-16.1384	3				2008-11-29 15:45:00	183	25.8357	0
2008-11-29 16:00:00	18	-10.759	2				2008-11-29 16:00:00	182	25.6577	-1
2008-11-29 16:15:00	16	0	0				2008-11-29 16:15:00	182	25.6577	0
2008-11-29 16:30:00	20	-21.5179	4				2008-11-29 16:30:00	183	25.8357	1
2008-11-29 16:45:00	16	0	-3				2008-11-29 16:45:00	183	25.8357	0
2008-11-29 17:00:00	16	0	-2				2008-11-29 17:00:00	183	25.8357	1
2008-11-29 17:15:00	16	0	0				2008-11-29 17:15:00	183	25.8357	1
2008-11-29 17:30:00	16	0	-4				2008-11-29 17:30:00	182	25.6577	-1
2008-11-29 17:45:00	16	0	0				2008-11-29 17:45:00	182	25.6577	-1
2008-11-29 18:00:00	17	-5.37948	X				2008-11-29 18:00:00	181	25.4803	X
2008-11-29 18:15:00	17	-5.37948	X				2008-11-29 18:15:00	181	25.4803	X
2008-11-29 18:30:00	16	0	X				2008-11-29 18:30:00	182	25.6577	X
2008-11-29 18:45:00	16	0	X				2008-11-29 18:45:00	182	25.6577	X
2008-11-29 19:00:00	16	0	-1				2008-11-29 19:00:00	182	25.6577	1
2008-11-29 19:15:00	16	0	-1				2008-11-29 19:15:00	182	25.6577	1
2008-11-29 19:30:00	16	0	0				2008-11-29 19:30:00	182	25.6577	0
2008-11-29 19:45:00	16	0	0				2008-11-29 19:45:00	182	25.6577	0
2008-11-29 20:00:00	16	0	0				2008-11-29 20:00:00	182	25.6577	0
2008-11-29 20:15:00	16	0	0				2008-11-29 20:15:00	182	25.6577	0
2008-11-29 20:30:00	17	-5.37948	1				2008-11-29 20:30:00	182	25.6577	0
2008-11-29 20:45:00	16	0	0				2008-11-29 20:45:00	182	25.6577	0
2008-11-29 21:00:00	16	0	0				2008-11-29 21:00:00	182	25.6577	0
2008-11-29 21:15:00	17	-5.37948	1				2008-11-29 21:15:00	182	25.6577	0
2008-11-29 21:30:00	16	0	-1				2008-11-29 21:30:00	183	25.8357	1
2008-11-29 21:45:00	16	0	0				2008-11-29 21:45:00	182	25.6577	0
2008-11-29 22:00:00	16	0	0				2008-11-29 22:00:00	182	25.6577	0
2008-11-29 22:15:00	16	0	-1				2008-11-29 22:15:00	182	25.6577	0
2008-11-29 22:30:00	16	0	0				2008-11-29 22:30:00	182	25.6577	-1
2008-11-29 22:45:00	16	0	0				2008-11-29 22:45:00	182	25.6577	0
2008-11-29 23:00:00	16	0	0				2008-11-29 23:00:00	182	25.6577	0
2008-11-29 23:15:00	16	0	0				2008-11-29 23:15:00	182	25.6577	0
2008-11-29 23:30:00	16	0	0				2008-11-29 23:30:00	182	25.6577	0
2008-11-29 23:45:00	17	-5.37948	1				2008-11-29 23:45:00	182	25.6577	0
2008-11-30	17	-5.37948	X				2008-11-30	182	25.6577	X
2008-11-30 00:15:00	17	-5.37948	X				2008-11-30 00:15:00	182	25.6577	X
2008-11-30 00:30:00	17	-5.37948	X				2008-11-30 00:30:00	182	25.6577	X
2008-11-30 00:45:00	16	0	X				2008-11-30 00:45:00	182	25.6577	X
2008-11-30 01:00:00	19	-16.1384	2				2008-11-30 01:00:00	182	25.6577	0
2008-11-30 01:15:00	16	0	-1				2008-11-30 01:15:00	182	25.6577	0
2008-11-30 01:30:00	19	-16.1384	2				2008-11-30 01:30:00	182	25.6577	0
2008-11-30 01:45:00	20	-21.5179	4				2008-11-30 01:45:00	182	25.6577	0
2008-11-30 02:00:00	16	0	-3				2008-11-30 02:00:00	182	25.6577	0
2008-11-30 02:15:00	16	0	0				2008-11-30 02:15:00	183	25.8357	1
2008-11-30 02:30:00	16	0	-3				2008-11-30 02:30:00	183	25.8357	1
2008-11-30 02:45:00	16	0	-4				2008-11-30 02:45:00	183	25.8357	1
2008-11-30 03:00:00	16	0	0				2008-11-30 03:00:00	183	25.8357	1
2008-11-30 03:15:00	19	-16.1384	3				2008-11-30 03:15:00	183	25.8357	0
2008-11-30 03:30:00	16	0	0				2008-11-30 03:30:00	182	25.6577	-1
2008-11-30 03:45:00	16	0	0				2008-11-30 03:45:00	182	25.6577	-1
2008-11-30 04:00:00	16	0	0				2008-11-30 04:00:00	182	25.6577	-1
2008-11-30 04:15:00	16	0	-3				2008-11-30 04:15:00	182	25.6577	-1
2008-11-30 04:30:00	16	0	0				2008-11-30 04:30:00	182	25.6577	0
2008-11-30 04:45:00	17	-5.37948	1				2008-11-30 04:45:00	180	25.3034	-2
2008-11-30 05:00:00	17	-5.37948	1				2008-11-30 05:00:00	179	25.127	-3
2008-11-30 05:15:00	17	-5.37948	1				2008-11-30 05:15:00	180	25.3034	-2
2008-11-30 05:30:00	17	-5.37948	1				2008-11-30 05:30:00	179	25.127	-3
2008-11-30 05:45:00	17	-5.37948	0				2008-11-30 05:45:00	179	25.127	-1
2008-11-30 06:00:00	17	-5.37948	X				2008-11-30 06:00:00	179	25.127	X
2008-11-30 06:15:00	17	-5.37948	X				2008-11-30 06:15:00	178	24.9512	X
2008-11-30 06:30:00	17	-5.37948	X				2008-11-30 06:30:00	180	25.3034	X
2008-11-30 06:45:00	17	-5.37948	X				2008-11-30 06:45:00	178	24.9512	X
2008-11-30 07:00:00	17	-5.37948	0				2008-11-30 07:00:00	179	25.127	0
2008-11-30 07:15:00	17	-5.37948	0				2008-11-30 07:15:00	182	25.6577	4
2008-11-30 07:30:00	17	-5.37948	0				2008-11-30 07:30:00	180	25.3034	0
2008-11-30 07:45:00	17	-5.37948	0				2008-11-30 07:45:00	180	25.3034	2
2008-11-30 08:00:00	18	-10.759	1				2008-11-30 08:00:00	182	25.6577	3
2008-11-30 08:15:00	16	0	-1				2008-11-30 08:15:00	182	25.6577	0
2008-11-30 08:30:00	17	-5.37948	0				2008-11-30 08:30:00	182	25.6577	2
2008-11-30 08:45:00	17	-5.37948	0				2008-11-30 08:45:00	182	25.6577	2
2008-11-30 09:00:00	16	0	-2				2008-11-30 09:00:00	182	25.6577	0
2008-11-30 09:15:00	16	0	0				2008-11-30 09:15:00	182	25.6577	0
2008-11-30 09:30:00	16	0	-1				2008-11-30 09:30:00	182	25.6577	0
2008-11-30 09:45:00	18	-10.759	1				2008-11-30 09:45:00	182	25.6577	0
2008-11-30 10:00:00	16	0	0				2008-11-30 10:00:00	182	25.6577	0
2008-11-30 10:15:00	16	0	0				2008-11-30 10:15:00	182	25.6577	0
2008-11-30 10:30:00	17	-5.37948	1				2008-11-30 10:30:00	181	25.4803	-1
2008-11-30 10:45:00	18	-10.759	0				2008-11-30 10:45:00	181	25.4803	-1
2008-11-30 11:00:00	17	-5.37948	1				2008-11-30 11:00:00	182	25.6577	0
2008-11-30 11:15:00	16	0	0				2008-11-30 11:15:00	182	25.6577	0
2008-11-30 11:30:00	16	0	-1				2008-11-30 11:30:00	182	25.6577	1
2008-11-30 11:45:00	18	-10.759	0				2008-11-30 11:45:00	182	25.6577	1
2008-11-30 12:00:00	18	-10.759	X				2008-11-30 12:00:00	181	25.4803	X
2008-11-30 12:15:00	18	-10.759	X				2008-11-30 12:15:00	182	25.6577	X
2008-11-30 12:30:00	16	0	X				2008-11-30 12:30:00	182	25.6577	X
2008-11-30 12:45:00	17	-5.37948	X				2008-11-30 12:45:00	181	25.4803	X
2008-11-30 13:00:00	17	-5.37948	-1				2008-11-30 13:00:00	181	25.4803	0
2008-11-30 13:15:00	17	-5.37948	-1				2008-11-30 13:15:00	181	25.4803	-1
2008-11-30 13:30:00	17	-5.37948	1				2008-11-30 13:30:00	181	25.4803	-1
2008-11-30 13:45:00	17	-5.37948	0				2008-11-30 13:45:00	180	25.3034	-1
2008-11-30 14:00:00	17	-5.37948	0				2008-11-30 14:00:00	180	25.3034	-1
2008-11-30 14:15:00	17	-5.37948	0				2008-11-30 14:15:00	180	25.3034	-1
2008-11-30 14:30:00	17	-5.37948	0				2008-11-30 14:30:00	181	25.4803	0
2008-11-30 14:45:00	17	-5.37948	0				2008-11-30 14:45:00	181	25.4803	1
2008-11-30 15:00:00	17	-5.37948	0				2008-11-30 15:00:00	181	25.4803	1
2008-11-30 15:15:00	16	0	-1				2008-11-30 15:15:00	179	25.127	-1
2008-11-30 15:30:00	17	-5.37948	0				2008-11-30 15:30:00	181	25.4803	0
2008-11-30 15:45:00	17	-5.37948	0				2008-11-30 15:45:00	181	25.4803	0
2008-11-30 16:00:00	17	-5.37948	0				2008-11-30 16:00:00	181	25.4803	0
2008-11-30 16:15:00	17	-5.37948	1				2008-11-30 16:15:00	181	25.4803	2
2008-11-30 16:30:00	17	-5.37948	0				2008-11-30 16:30:00	181	25.4803	0
2008-11-30 16:45:00	17	-5.37948	0				2008-11-30 16:45:00	182	25.6577	1
2008-11-30 17:00:00	16	0	-1				2008-11-30 17:00:00	182	25.6577	1
2008-11-30 17:15:00	16	0	-1				2008-11-30 17:15:00	182	25.6577	1
2008-11-30 17:30:00	16	0	-1				2008-11-30 17:30:00	182	25.6577	1
2008-11-30 17:45:00	16	0	-1				2008-11-30 17:45:00	182	25.6577	0
2008-11-30 18:00:00	17	-5.37948	X				2008-11-30 18:00:00	181	25.4803	X
2008-11-30 18:15:00	17	-5.37948	X				2008-11-30 18:15:00	181	25.4803	X
2008-11-30 18:30:00	17	-5.37948	X				2008-11-30 18:30:00	181	25.4803	X
2008-11-30 18:45:00	17	-5.37948	X				2008-11-30 18:45:00	181	25.4803	X
2008-11-30 19:00:00	17	-5.37948	0				2008-11-30 19:00:00	181	25.4803	0
2008-11-30 19:15:00	17	-5.37948	0				2008-11-30 19:15:00	181	25.4803	0
2008-11-30 19:30:00	16	0	-1				2008-11-30 19:30:00	182	25.6577	1
2008-11-30 19:45:00	17	-5.37948	0				2008-11-30 19:45:00	181	25.4803	0
2008-11-30 20:00:00	17	-5.37948	0				2008-11-30 20:00:00	181	25.4803	0
2008-11-30 20:15:00	16	0	-1				2008-11-30 20:15:00	182	25.6577	1
2008-11-30 20:30:00	20	-21.5179	4				2008-11-30 20:30:00	182	25.6577	0
2008-11-30 20:45:00	16	0	-1				2008-11-30 20:45:00	182	25.6577	1
2008-11-30 21:00:00	16	0	-1				2008-11-30 21:00:00	182	25.6577	1
2008-11-30 21:15:00	16	0	0				2008-11-30 21:15:00	182	25.6577	0
2008-11-30 21:30:00	16	0	-4				2008-11-30 21:30:00	182	25.6577	0
2008-11-30 21:45:00	16	0	0				2008-11-30 21:45:00	182	25.6577	0
2008-11-30 22:00:00	16	0	0				2008-11-30 22:00:00	182	25.6577	0
2008-11-30 22:15:00	16	0	0				2008-11-30 22:15:00	182	25.6577	0
2008-11-30 22:30:00	16	0	0				2008-11-30 22:30:00	182	25.6577	0
2008-11-30 22:45:00	17	-5.37948	1				2008-11-30 22:45:00	181	25.4803	-1
2008-11-30 23:00:00	16	0	0				2008-11-30 23:00:00	182	25.6577	0
2008-11-30 23:15:00	16	0	0				2008-11-30 23:15:00	182	25.6577	0
2008-11-30 23:30:00	16	0	0				2008-11-30 23:30:00	182	25.6577	0
2008-11-30 23:45:00	16	0	-1				2008-11-30 23:45:00	182	25.6577	1
2008-12-01	16	0	X				2008-12-01	181	25.4803	X
2008-12-01 00:15:00	16	0	X				2008-12-01 00:15:00	182	25.6577	X
2008-12-01 00:30:00	16	0	X				2008-12-01 00:30:00	178	24.9512	X
2008-12-01 00:45:00	17	-5.37948	X				2008-12-01 00:45:00	180	25.3034	X
2008-12-01 01:00:00	17	-5.37948	1				2008-12-01 01:00:00	181	25.4803	0
2008-12-01 01:15:00	17	-5.37948	1				2008-12-01 01:15:00	181	25.4803	-1
2008-12-01 01:30:00	17	-5.37948	1				2008-12-01 01:30:00	180	25.3034	2
2008-12-01 01:45:00	17	-5.37948	0				2008-12-01 01:45:00	180	25.3034	0
2008-12-01 02:00:00	17	-5.37948	0				2008-12-01 02:00:00	181	25.4803	0
2008-12-01 02:15:00	17	-5.37948	0				2008-12-01 02:15:00	180	25.3034	-1
2008-12-01 02:30:00	17	-5.37948	0				2008-12-01 02:30:00	179	25.127	-1
2008-12-01 02:45:00	17	-5.37948	0				2008-12-01 02:45:00	180	25.3034	0
2008-12-01 03:00:00	17	-5.37948	0				2008-12-01 03:00:00	180	25.3034	-1
2008-12-01 03:15:00	17	-5.37948	0				2008-12-01 03:15:00	179	25.127	-1
2008-12-01 03:30:00	17	-5.37948	0				2008-12-01 03:30:00	180	25.3034	1
2008-12-01 03:45:00	17	-5.37948	0				2008-12-01 03:45:00	180	25.3034	0
2008-12-01 04:00:00	17	-5.37948	0				2008-12-01 04:00:00	181	25.4803	1
2008-12-01 04:15:00	17	-5.37948	0				2008-12-01 04:15:00	179	25.127	0
2008-12-01 04:30:00	16	0	-1				2008-12-01 04:30:00	177	24.7758	-3
2008-12-01 04:45:00	17	-5.37948	0				2008-12-01 04:45:00	181	25.4803	1
2008-12-01 05:00:00	17	-5.37948	0				2008-12-01 05:00:00	181	25.4803	0
2008-12-01 05:15:00	17	-5.37948	0				2008-12-01 05:15:00	180	25.3034	1
2008-12-01 05:30:00	17	-5.37948	1				2008-12-01 05:30:00	180	25.3034	3
2008-12-01 05:45:00	17	-5.37948	0				2008-12-01 05:45:00	180	25.3034	-1
2008-12-01 06:00:00	17	-5.37948	X				2008-12-01 06:00:00	179	25.127	X
2008-12-01 06:15:00	17	-5.37948	X				2008-12-01 06:15:00	179	25.127	X
2008-12-01 06:30:00	17	-5.37948	X				2008-12-01 06:30:00	181	25.4803	X
2008-12-01 06:45:00	17	-5.37948	X				2008-12-01 06:45:00	181	25.4803	X
2008-12-01 07:00:00	18	-10.759	1				2008-12-01 07:00:00	181	25.4803	2
2008-12-01 07:15:00	17	-5.37948	0				2008-12-01 07:15:00	181	25.4803	2
2008-12-01 07:30:00	17	-5.37948	0				2008-12-01 07:30:00	181	25.4803	0
2008-12-01 07:45:00	17	-5.37948	0				2008-12-01 07:45:00	181	25.4803	0
2008-12-01 08:00:00	17	-5.37948	-1				2008-12-01 08:00:00	181	25.4803	0
2008-12-01 08:15:00	18	-10.759	1				2008-12-01 08:15:00	181	25.4803	0
2008-12-01 08:30:00	17	-5.37948	0				2008-12-01 08:30:00	181	25.4803	0
2008-12-01 08:45:00	18	-10.759	1				2008-12-01 08:45:00	181	25.4803	0
2008-12-01 09:00:00	17	-5.37948	0				2008-12-01 09:00:00	181	25.4803	0
2008-12-01 09:15:00	18	-10.759	0				2008-12-01 09:15:00	180	25.3034	-1
2008-12-01 09:30:00	17	-5.37948	0				2008-12-01 09:30:00	181	25.4803	0
2008-12-01 09:45:00	17	-5.37948	-1				2008-12-01 09:45:00	181	25.4803	0
2008-12-01 10:00:00	17	-5.37948	0				2008-12-01 10:00:00	180	25.3034	-1
2008-12-01 10:15:00	17	-5.37948	-1				2008-12-01 10:15:00	181	25.4803	1
2008-12-01 10:30:00	17	-5.37948	0				2008-12-01 10:30:00	181	25.4803	0
2008-12-01 10:45:00	17	-5.37948	0				2008-12-01 10:45:00	180	25.3034	-1
2008-12-01 11:00:00	17	-5.37948	0				2008-12-01 11:00:00	180	25.3034	0
2008-12-01 11:15:00	17	-5.37948	0				2008-12-01 11:15:00	180	25.3034	-1
2008-12-01 11:30:00	17	-5.37948	0				2008-12-01 11:30:00	180	25.3034	-1
2008-12-01 11:45:00	19	-16.1384	2				2008-12-01 11:45:00	180	25.3034	0
2008-12-01 12:00:00	17	-5.37948	X				2008-12-01 12:00:00	180	25.3034	X
2008-12-01 12:15:00	19	-16.1384	X				2008-12-01 12:15:00	180	25.3034	X
2008-12-01 12:30:00	20	-21.5179	X				2008-12-01 12:30:00	180	25.3034	X
2008-12-01 12:45:00	17	-5.37948	X				2008-12-01 12:45:00	179	25.127	X
2008-12-01 13:00:00	17	-5.37948	0				2008-12-01 13:00:00	180	25.3034	0
2008-12-01 13:15:00	18	-10.759	-1				2008-12-01 13:15:00	180	25.3034	0
2008-12-01 13:30:00	19	-16.1384	-1				2008-12-01 13:30:00	180	25.3034	0
2008-12-01 13:45:00	17	-5.37948	0				2008-12-01 13:45:00	180	25.3034	1
2008-12-01 14:00:00	17	-5.37948	0				2008-12-01 14:00:00	180	25.3034	0
2008-12-01 14:15:00	20	-21.5179	2				2008-12-01 14:15:00	180	25.3034	0
2008-12-01 14:30:00	19	-16.1384	0				2008-12-01 14:30:00	180	25.3034	0
2008-12-01 14:45:00	17	-5.37948	0				2008-12-01 14:45:00	180	25.3034	0
2008-12-01 15:00:00	17	-5.37948	0				2008-12-01 15:00:00	180	25.3034	0
2008-12-01 15:15:00	16	0	-4				2008-12-01 15:15:00	179	25.127	-1
2008-12-01 15:30:00	17	-5.37948	-2				2008-12-01 15:30:00	180	25.3034	0
2008-12-01 15:45:00	17	-5.37948	0				2008-12-01 15:45:00	180	25.3034	0
2008-12-01 16:00:00	17	-5.37948	0				2008-12-01 16:00:00	180	25.3034	0
2008-12-01 16:15:00	17	-5.37948	1				2008-12-01 16:15:00	180	25.3034	1
2008-12-01 16:30:00	17	-5.37948	0				2008-12-01 16:30:00	180	25.3034	0
2008-12-01 16:45:00	17	-5.37948	0				2008-12-01 16:45:00	180	25.3034	0
2008-12-01 17:00:00	17	-5.37948	0				2008-12-01 17:00:00	181	25.4803	1
2008-12-01 17:15:00	17	-5.37948	0				2008-12-01 17:15:00	181	25.4803	1
2008-12-01 17:30:00	17	-5.37948	0				2008-12-01 17:30:00	181	25.4803	1
2008-12-01 17:45:00	17	-5.37948	0				2008-12-01 17:45:00	181	25.4803	1
2008-12-01 18:00:00	17	-5.37948	X				2008-12-01 18:00:00	181	25.4803	X
2008-12-01 18:15:00	17	-5.37948	X				2008-12-01 18:15:00	181	25.4803	X
2008-12-01 18:30:00	16	0	X				2008-12-01 18:30:00	182	25.6577	X
2008-12-01 18:45:00	17	-5.37948	X				2008-12-01 18:45:00	181	25.4803	X
2008-12-01 19:00:00	16	0	-1				2008-12-01 19:00:00	182	25.6577	1
2008-12-01 19:15:00	17	-5.37948	0				2008-12-01 19:15:00	181	25.4803	0
2008-12-01 19:30:00	16	0	0				2008-12-01 19:30:00	182	25.6577	0
2008-12-01 19:45:00	17	-5.37948	0				2008-12-01 19:45:00	182	25.6577	1
2008-12-01 20:00:00	16	0	0				2008-12-01 20:00:00	183	25.8357	1
2008-12-01 20:15:00	16	0	-1				2008-12-01 20:15:00	183	25.8357	2
2008-12-01 20:30:00	16	0	0				2008-12-01 20:30:00	183	25.8357	1
2008-12-01 20:45:00	17	-5.37948	0				2008-12-01 20:45:00	182	25.6577	0
2008-12-01 21:00:00	16	0	0				2008-12-01 21:00:00	183	25.8357	0
2008-12-01 21:15:00	16	0	0				2008-12-01 21:15:00	182	25.6577	-1
2008-12-01 21:30:00	16	0	0				2008-12-01 21:30:00	182	25.6577	-1
2008-12-01 21:45:00	16	0	-1				2008-12-01 21:45:00	183	25.8357	1
2008-12-01 22:00:00	16	0	0				2008-12-01 22:00:00	182	25.6577	-1
2008-12-01 22:15:00	16	0	0				2008-12-01 22:15:00	183	25.8357	1
2008-12-01 22:30:00	16	0	0				2008-12-01 22:30:00	183	25.8357	1
2008-12-01 22:45:00	17	-5.37948	1				2008-12-01 22:45:00	183	25.8357	0
2008-12-01 23:00:00	16	0	0				2008-12-01 23:00:00	183	25.8357	1
2008-12-01 23:15:00	16	0	0				2008-12-01 23:15:00	182	25.6577	-1
2008-12-01 23:30:00	16	0	0				2008-12-01 23:30:00	182	25.6577	-1
2008-12-01 23:45:00	16	0	-1				2008-12-01 23:45:00	182	25.6577	-1
2008-12-02	16	0	X				2008-12-02	182	25.6577	X
2008-12-02 00:15:00	16	0	X				2008-12-02 00:15:00	182	25.6577	X
2008-12-02 00:30:00	19	-16.1384	X				2008-12-02 00:30:00	181	25.4803	X
2008-12-02 00:45:00	19	-16.1384	X				2008-12-02 00:45:00	180	25.3034	X
2008-12-02 01:00:00	17	-5.37948	1				2008-12-02 01:00:00	181	25.4803	-1
2008-12-02 01:15:00	19	-16.1384	3				2008-12-02 01:15:00	180	25.3034	-2
2008-12-02 01:30:00	17	-5.37948	-2				2008-12-02 01:30:00	180	25.3034	-1
2008-12-02 01:45:00	17	-5.37948	-2				2008-12-02 01:45:00	180	25.3034	0
2008-12-02 02:00:00	17	-5.37948	0				2008-12-02 02:00:00	180	25.3034	-1
2008-12-02 02:15:00	17	-5.37948	-2				2008-12-02 02:15:00	181	25.4803	1
2008-12-02 02:30:00	17	-5.37948	0				2008-12-02 02:30:00	181	25.4803	1
2008-12-02 02:45:00	18	-10.759	1				2008-12-02 02:45:00	180	25.3034	0
2008-12-02 03:00:00	17	-5.37948	0				2008-12-02 03:00:00	181	25.4803	1
2008-12-02 03:15:00	17	-5.37948	0				2008-12-02 03:15:00	181	25.4803	0
2008-12-02 03:30:00	19	-16.1384	2				2008-12-02 03:30:00	181	25.4803	0
2008-12-02 03:45:00	17	-5.37948	-1				2008-12-02 03:45:00	181	25.4803	1
2008-12-02 04:00:00	17	-5.37948	0				2008-12-02 04:00:00	181	25.4803	0
2008-12-02 04:15:00	18	-10.759	1				2008-12-02 04:15:00	181	25.4803	0
2008-12-02 04:30:00	18	-10.759	-1				2008-12-02 04:30:00	180	25.3034	-1
2008-12-02 04:45:00	17	-5.37948	0				2008-12-02 04:45:00	180	25.3034	-1
2008-12-02 05:00:00	17	-5.37948	0				2008-12-02 05:00:00	180	25.3034	-1
2008-12-02 05:15:00	18	-10.759	0				2008-12-02 05:15:00	180	25.3034	-1
2008-12-02 05:30:00	17	-5.37948	-1				2008-12-02 05:30:00	180	25.3034	0
2008-12-02 05:45:00	17	-5.37948	0				2008-12-02 05:45:00	180	25.3034	0
2008-12-02 06:00:00	17	-5.37948	X				2008-12-02 06:00:00	180	25.3034	X
2008-12-02 06:15:00	19	-16.1384	X				2008-12-02 06:15:00	180	25.3034	X
2008-12-02 06:30:00	19	-16.1384	X				2008-12-02 06:30:00	180	25.3034	X
2008-12-02 06:45:00	17	-5.37948	X				2008-12-02 06:45:00	180	25.3034	X
2008-12-02 07:00:00	17	-5.37948	0				2008-12-02 07:00:00	180	25.3034	0
2008-12-02 07:15:00	19	-16.1384	0				2008-12-02 07:15:00	180	25.3034	0
2008-12-02 07:30:00	17	-5.37948	-2				2008-12-02 07:30:00	180	25.3034	0
2008-12-02 07:45:00	17	-5.37948	0				2008-12-02 07:45:00	180	25.3034	0
2008-12-02 08:00:00	19	-16.1384	2				2008-12-02 08:00:00	180	25.3034	0
2008-12-02 08:15:00	17	-5.37948	-2				2008-12-02 08:15:00	180	25.3034	0
2008-12-02 08:30:00	17	-5.37948	0				2008-12-02 08:30:00	180	25.3034	0
2008-12-02 08:45:00	18	-10.759	1				2008-12-02 08:45:00	180	25.3034	0
2008-12-02 09:00:00	17	-5.37948	-2				2008-12-02 09:00:00	180	25.3034	0
2008-12-02 09:15:00	17	-5.37948	0				2008-12-02 09:15:00	180	25.3034	0
2008-12-02 09:30:00	17	-5.37948	0				2008-12-02 09:30:00	180	25.3034	0
2008-12-02 09:45:00	17	-5.37948	-1				2008-12-02 09:45:00	180	25.3034	0
2008-12-02 10:00:00	18	-10.759	1				2008-12-02 10:00:00	180	25.3034	0
2008-12-02 10:15:00	19	-16.1384	2				2008-12-02 10:15:00	180	25.3034	0
2008-12-02 10:30:00	17	-5.37948	0				2008-12-02 10:30:00	180	25.3034	0
2008-12-02 10:45:00	19	-16.1384	2				2008-12-02 10:45:00	180	25.3034	0
2008-12-02 11:00:00	17	-5.37948	-1				2008-12-02 11:00:00	181	25.4803	1
2008-12-02 11:15:00	17	-5.37948	-2				2008-12-02 11:15:00	181	25.4803	1
2008-12-02 11:30:00	17	-5.37948	0				2008-12-02 11:30:00	181	25.4803	1
2008-12-02 11:45:00	17	-5.37948	-2				2008-12-02 11:45:00	180	25.3034	0
2008-12-02 12:00:00	19	-16.1384	X				2008-12-02 12:00:00	180	25.3034	X
2008-12-02 12:15:00	17	-5.37948	X				2008-12-02 12:15:00	180	25.3034	X
2008-12-02 12:30:00	17	-5.37948	X				2008-12-02 12:30:00	180	25.3034	X
2008-12-02 12:45:00	18	-10.759	X				2008-12-02 12:45:00	180	25.3034	X
2008-12-02 13:00:00	18	-10.759	-1				2008-12-02 13:00:00	180	25.3034	0
2008-12-02 13:15:00	17	-5.37948	0				2008-12-02 13:15:00	180	25.3034	0
2008-12-02 13:30:00	18	-10.759	1				2008-12-02 13:30:00	180	25.3034	0
2008-12-02 13:45:00	18	-10.759	0				2008-12-02 13:45:00	180	25.3034	0
2008-12-02 14:00:00	19	-16.1384	1				2008-12-02 14:00:00	180	25.3034	0
2008-12-02 14:15:00	17	-5.37948	0				2008-12-02 14:15:00	180	25.3034	0
2008-12-02 14:30:00	18	-10.759	0				2008-12-02 14:30:00	180	25.3034	0
2008-12-02 14:45:00	17	-5.37948	-1				2008-12-02 14:45:00	179	25.127	-1
2008-12-02 15:00:00	17	-5.37948	-2				2008-12-02 15:00:00	180	25.3034	0
2008-12-02 15:15:00	17	-5.37948	0				2008-12-02 15:15:00	180	25.3034	0
2008-12-02 15:30:00	17	-5.37948	-1				2008-12-02 15:30:00	180	25.3034	0
2008-12-02 15:45:00	17	-5.37948	0				2008-12-02 15:45:00	180	25.3034	1
2008-12-02 16:00:00	17	-5.37948	0				2008-12-02 16:00:00	179	25.127	-1
2008-12-02 16:15:00	18	-10.759	1				2008-12-02 16:15:00	179	25.127	-1
2008-12-02 16:30:00	17	-5.37948	0				2008-12-02 16:30:00	180	25.3034	0
2008-12-02 16:45:00	17	-5.37948	0				2008-12-02 16:45:00	180	25.3034	0
2008-12-02 17:00:00	17	-5.37948	0				2008-12-02 17:00:00	180	25.3034	1
2008-12-02 17:15:00	17	-5.37948	-1				2008-12-02 17:15:00	180	25.3034	1
2008-12-02 17:30:00	19	-16.1384	2				2008-12-02 17:30:00	180	25.3034	0
2008-12-02 17:45:00	17	-5.37948	0				2008-12-02 17:45:00	180	25.3034	0
2008-12-02 18:00:00	17	-5.37948	X				2008-12-02 18:00:00	180	25.3034	X
2008-12-02 18:15:00	17	-5.37948	X				2008-12-02 18:15:00	181	25.4803	X
2008-12-02 18:30:00	17	-5.37948	X				2008-12-02 18:30:00	181	25.4803	X
2008-12-02 18:45:00	18	-10.759	X				2008-12-02 18:45:00	181	25.4803	X
2008-12-02 19:00:00	16	0	-1				2008-12-02 19:00:00	182	25.6577	2
2008-12-02 19:15:00	17	-5.37948	0				2008-12-02 19:15:00	180	25.3034	-1
2008-12-02 19:30:00	16	0	-1				2008-12-02 19:30:00	182	25.6577	1
2008-12-02 19:45:00	16	0	-2				2008-12-02 19:45:00	182	25.6577	1
2008-12-02 20:00:00	16	0	0				2008-12-02 20:00:00	182	25.6577	0
2008-12-02 20:15:00	17	-5.37948	0				2008-12-02 20:15:00	183	25.8357	3
2008-12-02 20:30:00	16	0	0				2008-12-02 20:30:00	183	25.8357	1
2008-12-02 20:45:00	17	-5.37948	1				2008-12-02 20:45:00	181	25.4803	-1
2008-12-02 21:00:00	19	-16.1384	3				2008-12-02 21:00:00	182	25.6577	0
2008-12-02 21:15:00	16	0	-1				2008-12-02 21:15:00	183	25.8357	0
2008-12-02 21:30:00	16	0	0				2008-12-02 21:30:00	183	25.8357	0
2008-12-02 21:45:00	16	0	-1				2008-12-02 21:45:00	183	25.8357	2
2008-12-02 22:00:00	16	0	-3				2008-12-02 22:00:00	183	25.8357	1
2008-12-02 22:15:00	18	-10.759	2				2008-12-02 22:15:00	181	25.4803	-2
2008-12-02 22:30:00	16	0	0				2008-12-02 22:30:00	182	25.6577	-1
2008-12-02 22:45:00	17	-5.37948	1				2008-12-02 22:45:00	181	25.4803	-2
2008-12-02 23:00:00	16	0	0				2008-12-02 23:00:00	182	25.6577	-1
2008-12-02 23:15:00	16	0	-2				2008-12-02 23:15:00	182	25.6577	1
2008-12-02 23:30:00	20	-21.5179	4				2008-12-02 23:30:00	181	25.4803	-1
2008-12-02 23:45:00	17	-5.37948	0				2008-12-02 23:45:00	181	25.4803	0
2008-12-03	17	-5.37948	X				2008-12-03	181	25.4803	X
2008-12-03 00:15:00	16	0	X				2008-12-03 00:15:00	183	25.8357	X
2008-12-03 00:30:00	16	0	X				2008-12-03 00:30:00	183	25.8357	X
2008-12-03 00:45:00	16	0	X				2008-12-03 00:45:00	183	25.8357	X
2008-12-03 01:00:00	17	-5.37948	0				2008-12-03 01:00:00	182	25.6577	1
2008-12-03 01:15:00	18	-10.759	2				2008-12-03 01:15:00	181	25.4803	-2
2008-12-03 01:30:00	16	0	0				2008-12-03 01:30:00	182	25.6577	-1
2008-12-03 01:45:00	17	-5.37948	1				2008-12-03 01:45:00	181	25.4803	-2
2008-12-03 02:00:00	17	-5.37948	0				2008-12-03 02:00:00	181	25.4803	-1
2008-12-03 02:15:00	17	-5.37948	-1				2008-12-03 02:15:00	181	25.4803	0
2008-12-03 02:30:00	17	-5.37948	1				2008-12-03 02:30:00	181	25.4803	-1
2008-12-03 02:45:00	17	-5.37948	0				2008-12-03 02:45:00	181	25.4803	0
2008-12-03 03:00:00	17	-5.37948	0				2008-12-03 03:00:00	180	25.3034	-1
2008-12-03 03:15:00	17	-5.37948	0				2008-12-03 03:15:00	181	25.4803	0
2008-12-03 03:30:00	17	-5.37948	0				2008-12-03 03:30:00	181	25.4803	0
2008-12-03 03:45:00	17	-5.37948	0				2008-12-03 03:45:00	181	25.4803	0
2008-12-03 04:00:00	17	-5.37948	0				2008-12-03 04:00:00	181	25.4803	1
2008-12-03 04:15:00	17	-5.37948	0				2008-12-03 04:15:00	181	25.4803	0
2008-12-03 04:30:00	17	-5.37948	0				2008-12-03 04:30:00	181	25.4803	0
2008-12-03 04:45:00	17	-5.37948	0				2008-12-03 04:45:00	181	25.4803	0
2008-12-03 05:00:00	17	-5.37948	0				2008-12-03 05:00:00	181	25.4803	0
2008-12-03 05:15:00	17	-5.37948	0				2008-12-03 05:15:00	181	25.4803	0
2008-12-03 05:30:00	17	-5.37948	0				2008-12-03 05:30:00	181	25.4803	0
2008-12-03 05:45:00	17	-5.37948	0				2008-12-03 05:45:00	180	25.3034	-1
2008-12-03 06:00:00	17	-5.37948	X				2008-12-03 06:00:00	180	25.3034	X
2008-12-03 06:15:00	16	0	X				2008-12-03 06:15:00	180	25.3034	X
2008-12-03 06:30:00	17	-5.37948	X				2008-12-03 06:30:00	180	25.3034	X
2008-12-03 06:45:00	16	0	X				2008-12-03 06:45:00	179	25.127	X
2008-12-03 07:00:00	17	-5.37948	0				2008-12-03 07:00:00	179	25.127	-1
2008-12-03 07:15:00	16	0	0				2008-12-03 07:15:00	179	25.127	-1
2008-12-03 07:30:00	17	-5.37948	0				2008-12-03 07:30:00	179	25.127	-1
2008-12-03 07:45:00	17	-5.37948	1				2008-12-03 07:45:00	179	25.127	0
2008-12-03 08:00:00	16	0	-1				2008-12-03 08:00:00	179	25.127	0
2008-12-03 08:15:00	17	-5.37948	1				2008-12-03 08:15:00	179	25.127	0
2008-12-03 08:30:00	17	-5.37948	0				2008-12-03 08:30:00	179	25.127	0
2008-12-03 08:45:00	17	-5.37948	0				2008-12-03 08:45:00	179	25.127	0
2008-12-03 09:00:00	16	0	0				2008-12-03 09:00:00	178	24.9512	-1
2008-12-03 09:15:00	17	-5.37948	0				2008-12-03 09:15:00	179	25.127	0
2008-12-03 09:30:00	16	0	-1				2008-12-03 09:30:00	179	25.127	0
2008-12-03 09:45:00	16	0	-1				2008-12-03 09:45:00	179	25.127	0
2008-12-03 10:00:00	16	0	0				2008-12-03 10:00:00	177	24.7758	-1
2008-12-03 10:15:00	17	-5.37948	0				2008-12-03 10:15:00	179	25.127	0
2008-12-03 10:30:00	16	0	0				2008-12-03 10:30:00	177	24.7758	-2
2008-12-03 10:45:00	18	-10.759	2				2008-12-03 10:45:00	179	25.127	0
2008-12-03 11:00:00	17	-5.37948	1				2008-12-03 11:00:00	179	25.127	2
2008-12-03 11:15:00	17	-5.37948	0				2008-12-03 11:15:00	179	25.127	0
2008-12-03 11:30:00	16	0	0				2008-12-03 11:30:00	178	24.9512	1
2008-12-03 11:45:00	16	0	-2				2008-12-03 11:45:00	178	24.9512	-1
2008-12-03 12:00:00	16	0	X				2008-12-03 12:00:00	176	24.601	X
2008-12-03 12:15:00	17	-5.37948	X				2008-12-03 12:15:00	175	24.4266	X
2008-12-03 12:30:00	16	0	X				2008-12-03 12:30:00	177	24.7758	X
2008-12-03 12:45:00	16	0	X				2008-12-03 12:45:00	178	24.9512	X
2008-12-03 13:00:00	16	0	0				2008-12-03 13:00:00	179	25.127	3
2008-12-03 13:15:00	16	0	-1				2008-12-03 13:15:00	178	24.9512	3
2008-12-03 13:30:00	17	-5.37948	1				2008-12-03 13:30:00	174	24.2528	-3
2008-12-03 13:45:00	16	0	0				2008-12-03 13:45:00	174	24.2528	-4
2008-12-03 14:00:00	16	0	0				2008-12-03 14:00:00	176	24.601	-3
2008-12-03 14:15:00	16	0	0				2008-12-03 14:15:00	174	24.2528	-4
2008-12-03 14:30:00	17	-5.37948	0				2008-12-03 14:30:00	177	24.7758	3
2008-12-03 14:45:00	16	0	0				2008-12-03 14:45:00	174	24.2528	0
2008-12-03 15:00:00	16	0	0				2008-12-03 15:00:00	174	24.2528	-2
2008-12-03 15:15:00	18	-10.759	2				2008-12-03 15:15:00	179	25.127	5
2008-12-03 15:30:00	20	-21.5179	3				2008-12-03 15:30:00	179	25.127	2
2008-12-03 15:45:00	20	-21.5179	4				2008-12-03 15:45:00	179	25.127	5
2008-12-03 16:00:00	17	-5.37948	1				2008-12-03 16:00:00	179	25.127	5
2008-12-03 16:15:00	17	-5.37948	-1				2008-12-03 16:15:00	179	25.127	0
2008-12-03 16:30:00	17	-5.37948	-3				2008-12-03 16:30:00	179	25.127	0
2008-12-03 16:45:00	17	-5.37948	-3				2008-12-03 16:45:00	179	25.127	0
2008-12-03 17:00:00	17	-5.37948	0				2008-12-03 17:00:00	179	25.127	0
2008-12-03 17:15:00	17	-5.37948	0				2008-12-03 17:15:00	179	25.127	0
2008-12-03 17:30:00	17	-5.37948	0				2008-12-03 17:30:00	179	25.127	0
2008-12-03 17:45:00	18	-10.759	1				2008-12-03 17:45:00	180	25.3034	1
2008-12-03 18:00:00	17	-5.37948	X				2008-12-03 18:00:00	180	25.3034	X
2008-12-03 18:15:00	17	-5.37948	X				2008-12-03 18:15:00	179	25.127	X
2008-12-03 18:30:00	17	-5.37948	X				2008-12-03 18:30:00	180	25.3034	X
2008-12-03 18:45:00	17	-5.37948	X				2008-12-03 18:45:00	180	25.3034	X
2008-12-03 19:00:00	17	-5.37948	0				2008-12-03 19:00:00	181	25.4803	1
2008-12-03 19:15:00	17	-5.37948	0				2008-12-03 19:15:00	181	25.4803	2
2008-12-03 19:30:00	17	-5.37948	0				2008-12-03 19:30:00	181	25.4803	1
2008-12-03 19:45:00	17	-5.37948	0				2008-12-03 19:45:00	180	25.3034	0
2008-12-03 20:00:00	17	-5.37948	0				2008-12-03 20:00:00	180	25.3034	-1
2008-12-03 20:15:00	16	0	-1				2008-12-03 20:15:00	183	25.8357	2
2008-12-03 20:30:00	16	0	-1				2008-12-03 20:30:00	182	25.6577	1
2008-12-03 20:45:00	16	0	-1				2008-12-03 20:45:00	182	25.6577	2
2008-12-03 21:00:00	16	0	-1				2008-12-03 21:00:00	182	25.6577	2
2008-12-03 21:15:00	16	0	0				2008-12-03 21:15:00	182	25.6577	-1
2008-12-03 21:30:00	17	-5.37948	1				2008-12-03 21:30:00	182	25.6577	0
2008-12-03 21:45:00	16	0	0				2008-12-03 21:45:00	182	25.6577	0
2008-12-03 22:00:00	16	0	0				2008-12-03 22:00:00	183	25.8357	1
2008-12-03 22:15:00	16	0	0				2008-12-03 22:15:00	182	25.6577	0
2008-12-03 22:30:00	16	0	-1				2008-12-03 22:30:00	182	25.6577	0
2008-12-03 22:45:00	16	0	0				2008-12-03 22:45:00	182	25.6577	0
2008-12-03 23:00:00	16	0	0				2008-12-03 23:00:00	182	25.6577	-1
2008-12-03 23:15:00	16	0	0				2008-12-03 23:15:00	182	25.6577	0
2008-12-03 23:30:00	18	-10.759	2				2008-12-03 23:30:00	181	25.4803	-1
2008-12-03 23:45:00	17	-5.37948	1				2008-12-03 23:45:00	181	25.4803	-1
2008-12-04	17	-5.37948	X				2008-12-04	181	25.4803	X
2008-12-04 00:15:00	17	-5.37948	X				2008-12-04 00:15:00	181	25.4803	X
2008-12-04 00:30:00	16	0	X				2008-12-04 00:30:00	181	25.4803	X
2008-12-04 00:45:00	19	-16.1384	X				2008-12-04 00:45:00	180	25.3034	X
2008-12-04 01:00:00	17	-5.37948	0				2008-12-04 01:00:00	181	25.4803	0
2008-12-04 01:15:00	17	-5.37948	0				2008-12-04 01:15:00	180	25.3034	-1
2008-12-04 01:30:00	17	-5.37948	1				2008-12-04 01:30:00	180	25.3034	-1
2008-12-04 01:45:00	19	-16.1384	0				2008-12-04 01:45:00	180	25.3034	0
2008-12-04 02:00:00	17	-5.37948	0				2008-12-04 02:00:00	180	25.3034	-1
2008-12-04 02:15:00	17	-5.37948	0				2008-12-04 02:15:00	179	25.127	-1
2008-12-04 02:30:00	19	-16.1384	2				2008-12-04 02:30:00	179	25.127	-1
2008-12-04 02:45:00	17	-5.37948	-2				2008-12-04 02:45:00	179	25.127	-1
2008-12-04 03:00:00	17	-5.37948	0				2008-12-04 03:00:00	179	25.127	-1
2008-12-04 03:15:00	19	-16.1384	2				2008-12-04 03:15:00	179	25.127	0
2008-12-04 03:30:00	17	-5.37948	-2				2008-12-04 03:30:00	179	25.127	0
2008-12-04 03:45:00	17	-5.37948	0				2008-12-04 03:45:00	180	25.3034	1
2008-12-04 04:00:00	18	-10.759	1				2008-12-04 04:00:00	180	25.3034	1
2008-12-04 04:15:00	17	-5.37948	-2				2008-12-04 04:15:00	180	25.3034	1
2008-12-04 04:30:00	18	-10.759	1				2008-12-04 04:30:00	180	25.3034	1
2008-12-04 04:45:00	18	-10.759	1				2008-12-04 04:45:00	180	25.3034	0
2008-12-04 05:00:00	17	-5.37948	-1				2008-12-04 05:00:00	180	25.3034	0
2008-12-04 05:15:00	17	-5.37948	0				2008-12-04 05:15:00	180	25.3034	0
2008-12-04 05:30:00	17	-5.37948	-1				2008-12-04 05:30:00	180	25.3034	0
2008-12-04 05:45:00	17	-5.37948	-1				2008-12-04 05:45:00	180	25.3034	0
2008-12-04 06:00:00	18	-10.759	X				2008-12-04 06:00:00	180	25.3034	X
2008-12-04 06:15:00	17	-5.37948	X				2008-12-04 06:15:00	180	25.3034	X
2008-12-04 06:30:00	19	-16.1384	X				2008-12-04 06:30:00	180	25.3034	X
2008-12-04 06:45:00	17	-5.37948	X				2008-12-04 06:45:00	180	25.3034	X
2008-12-04 07:00:00	19	-16.1384	1				2008-12-04 07:00:00	180	25.3034	0
2008-12-04 07:15:00	17	-5.37948	0				2008-12-04 07:15:00	180	25.3034	0
2008-12-04 07:30:00	20	-21.5179	1				2008-12-04 07:30:00	180	25.3034	0
2008-12-04 07:45:00	17	-5.37948	0				2008-12-04 07:45:00	180	25.3034	0
2008-12-04 08:00:00	20	-21.5179	1				2008-12-04 08:00:00	180	25.3034	0
2008-12-04 08:15:00	17	-5.37948	0				2008-12-04 08:15:00	180	25.3034	0
2008-12-04 08:30:00	17	-5.37948	-3				2008-12-04 08:30:00	180	25.3034	0
2008-12-04 08:45:00	17	-5.37948	0				2008-12-04 08:45:00	180	25.3034	0
2008-12-04 09:00:00	17	-5.37948	-3				2008-12-04 09:00:00	180	25.3034	0
2008-12-04 09:15:00	18	-10.759	1				2008-12-04 09:15:00	180	25.3034	0
2008-12-04 09:30:00	17	-5.37948	0				2008-12-04 09:30:00	179	25.127	-1
2008-12-04 09:45:00	17	-5.37948	0				2008-12-04 09:45:00	179	25.127	-1
2008-12-04 10:00:00	17	-5.37948	0				2008-12-04 10:00:00	179	25.127	-1
2008-12-04 10:15:00	17	-5.37948	-1				2008-12-04 10:15:00	179	25.127	-1
2008-12-04 10:30:00	17	-5.37948	0				2008-12-04 10:30:00	179	25.127	0
2008-12-04 10:45:00	17	-5.37948	0				2008-12-04 10:45:00	179	25.127	0
2008-12-04 11:00:00	17	-5.37948	0				2008-12-04 11:00:00	179	25.127	0
2008-12-04 11:15:00	17	-5.37948	0				2008-12-04 11:15:00	179	25.127	0
2008-12-04 11:30:00	17	-5.37948	0				2008-12-04 11:30:00	179	25.127	0
2008-12-04 11:45:00	17	-5.37948	0				2008-12-04 11:45:00	179	25.127	0
2008-12-04 12:00:00	18	-10.759	X				2008-12-04 12:00:00	179	25.127	X
2008-12-04 12:15:00	20	-21.5179	X				2008-12-04 12:15:00	179	25.127	X
2008-12-04 12:30:00	17	-5.37948	X				2008-12-04 12:30:00	179	25.127	X
2008-12-04 12:45:00	19	-16.1384	X				2008-12-04 12:45:00	179	25.127	X
2008-12-04 13:00:00	19	-16.1384	1				2008-12-04 13:00:00	179	25.127	0
2008-12-04 13:15:00	17	-5.37948	-3				2008-12-04 13:15:00	179	25.127	0
2008-12-04 13:30:00	17	-5.37948	0				2008-12-04 13:30:00	179	25.127	0
2008-12-04 13:45:00	17	-5.37948	-2				2008-12-04 13:45:00	179	25.127	0
2008-12-04 14:00:00	19	-16.1384	0				2008-12-04 14:00:00	179	25.127	0
2008-12-04 14:15:00	18	-10.759	1				2008-12-04 14:15:00	179	25.127	0
2008-12-04 14:30:00	19	-16.1384	2				2008-12-04 14:30:00	179	25.127	0
2008-12-04 14:45:00	17	-5.37948	0				2008-12-04 14:45:00	179	25.127	0
2008-12-04 15:00:00	17	-5.37948	-2				2008-12-04 15:00:00	179	25.127	0
2008-12-04 15:15:00	17	-5.37948	-1				2008-12-04 15:15:00	178	24.9512	-1
2008-12-04 15:30:00	17	-5.37948	-2				2008-12-04 15:30:00	179	25.127	0
2008-12-04 15:45:00	17	-5.37948	0				2008-12-04 15:45:00	179	25.127	0
2008-12-04 16:00:00	17	-5.37948	0				2008-12-04 16:00:00	179	25.127	0
2008-12-04 16:15:00	17	-5.37948	0				2008-12-04 16:15:00	179	25.127	1
2008-12-04 16:30:00	17	-5.37948	0				2008-12-04 16:30:00	179	25.127	0
2008-12-04 16:45:00	17	-5.37948	0				2008-12-04 16:45:00	179	25.127	0
2008-12-04 17:00:00	17	-5.37948	0				2008-12-04 17:00:00	179	25.127	0
2008-12-04 17:15:00	17	-5.37948	0				2008-12-04 17:15:00	179	25.127	0
2008-12-04 17:30:00	17	-5.37948	0				2008-12-04 17:30:00	179	25.127	0
2008-12-04 17:45:00	17	-5.37948	0				2008-12-04 17:45:00	179	25.127	0
2008-12-04 18:00:00	16	0	X				2008-12-04 18:00:00	180	25.3034	X
2008-12-04 18:15:00	17	-5.37948	X				2008-12-04 18:15:00	179	25.127	X
2008-12-04 18:30:00	18	-10.759	X				2008-12-04 18:30:00	180	25.3034	X
2008-12-04 18:45:00	17	-5.37948	X				2008-12-04 18:45:00	180	25.3034	X
2008-12-04 19:00:00	17	-5.37948	1				2008-12-04 19:00:00	180	25.3034	0
2008-12-04 19:15:00	17	-5.37948	0				2008-12-04 19:15:00	180	25.3034	1
2008-12-04 19:30:00	16	0	-2				2008-12-04 19:30:00	180	25.3034	0
2008-12-04 19:45:00	17	-5.37948	0				2008-12-04 19:45:00	181	25.4803	1
2008-12-04 20:00:00	17	-5.37948	0				2008-12-04 20:00:00	181	25.4803	1
2008-12-04 20:15:00	17	-5.37948	0				2008-12-04 20:15:00	182	25.6577	2
2008-12-04 20:30:00	16	0	0				2008-12-04 20:30:00	182	25.6577	2
2008-12-04 20:45:00	17	-5.37948	0				2008-12-04 20:45:00	181	25.4803	0
2008-12-04 21:00:00	16	0	-1				2008-12-04 21:00:00	182	25.6577	1
2008-12-04 21:15:00	17	-5.37948	0				2008-12-04 21:15:00	181	25.4803	-1
2008-12-04 21:30:00	17	-5.37948	1				2008-12-04 21:30:00	181	25.4803	-1
2008-12-04 21:45:00	17	-5.37948	0				2008-12-04 21:45:00	181	25.4803	0
2008-12-04 22:00:00	17	-5.37948	1				2008-12-04 22:00:00	181	25.4803	-1
2008-12-04 22:15:00	17	-5.37948	0				2008-12-04 22:15:00	181	25.4803	0
2008-12-04 22:30:00	17	-5.37948	0				2008-12-04 22:30:00	181	25.4803	0
2008-12-04 22:45:00	17	-5.37948	0				2008-12-04 22:45:00	181	25.4803	0
2008-12-04 23:00:00	16	0	-1				2008-12-04 23:00:00	181	25.4803	0
2008-12-04 23:15:00	16	0	-1				2008-12-04 23:15:00	182	25.6577	1
2008-12-04 23:30:00	17	-5.37948	0				2008-12-04 23:30:00	181	25.4803	0
2008-12-04 23:45:00	17	-5.37948	0				2008-12-04 23:45:00	181	25.4803	0
2008-12-05	19	-16.1384	X				2008-12-05	179	25.127	X
2008-12-05 00:15:00	17	-5.37948	X				2008-12-05 00:15:00	180	25.3034	X
2008-12-05 00:30:00	19	-16.1384	X				2008-12-05 00:30:00	179	25.127	X
2008-12-05 00:45:00	17	-5.37948	X				2008-12-05 00:45:00	179	25.127	X
2008-12-05 01:00:00	17	-5.37948	-2				2008-12-05 01:00:00	180	25.3034	1
2008-12-05 01:15:00	17	-5.37948	0				2008-12-05 01:15:00	180	25.3034	0
2008-12-05 01:30:00	18	-10.759	-1				2008-12-05 01:30:00	180	25.3034	1
2008-12-05 01:45:00	17	-5.37948	0				2008-12-05 01:45:00	181	25.4803	2
2008-12-05 02:00:00	17	-5.37948	0				2008-12-05 02:00:00	181	25.4803	1
2008-12-05 02:15:00	17	-5.37948	0				2008-12-05 02:15:00	181	25.4803	1
2008-12-05 02:30:00	17	-5.37948	-1				2008-12-05 02:30:00	180	25.3034	0
2008-12-05 02:45:00	17	-5.37948	0				2008-12-05 02:45:00	179	25.127	-2
2008-12-05 03:00:00	17	-5.37948	0				2008-12-05 03:00:00	180	25.3034	-1
2008-12-05 03:15:00	17	-5.37948	0				2008-12-05 03:15:00	180	25.3034	-1
2008-12-05 03:30:00	17	-5.37948	0				2008-12-05 03:30:00	180	25.3034	0
2008-12-05 03:45:00	17	-5.37948	0				2008-12-05 03:45:00	180	25.3034	1
2008-12-05 04:00:00	17	-5.37948	0				2008-12-05 04:00:00	180	25.3034	0
2008-12-05 04:15:00	17	-5.37948	0				2008-12-05 04:15:00	179	25.127	-1
2008-12-05 04:30:00	16	0	-1				2008-12-05 04:30:00	179	25.127	-1
2008-12-05 04:45:00	17	-5.37948	0				2008-12-05 04:45:00	180	25.3034	0
2008-12-05 05:00:00	17	-5.37948	0				2008-12-05 05:00:00	180	25.3034	0
2008-12-05 05:15:00	17	-5.37948	0				2008-12-05 05:15:00	179	25.127	0
2008-12-05 05:30:00	16	0	0				2008-12-05 05:30:00	179	25.127	0
2008-12-05 05:45:00	16	0	-1				2008-12-05 05:45:00	179	25.127	-1
2008-12-05 06:00:00	17	-5.37948	X				2008-12-05 06:00:00	179	25.127	X
2008-12-05 06:15:00	16	0	X				2008-12-05 06:15:00	179	25.127	X
2008-12-05 06:30:00	17	-5.37948	X				2008-12-05 06:30:00	179	25.127	X
2008-12-05 06:45:00	17	-5.37948	X				2008-12-05 06:45:00	178	24.9512	X
2008-12-05 07:00:00	17	-5.37948	0				2008-12-05 07:00:00	178	24.9512	-1
2008-12-05 07:15:00	17	-5.37948	1				2008-12-05 07:15:00	179	25.127	0
2008-12-05 07:30:00	16	0	-1				2008-12-05 07:30:00	178	24.9512	-1
2008-12-05 07:45:00	16	0	-1				2008-12-05 07:45:00	179	25.127	1
2008-12-05 08:00:00	17	-5.37948	0				2008-12-05 08:00:00	179	25.127	1
2008-12-05 08:15:00	16	0	-1				2008-12-05 08:15:00	178	24.9512	-1
2008-12-05 08:30:00	17	-5.37948	1				2008-12-05 08:30:00	178	24.9512	0
2008-12-05 08:45:00	16	0	0				2008-12-05 08:45:00	179	25.127	0
2008-12-05 09:00:00	16	0	-1				2008-12-05 09:00:00	179	25.127	0
2008-12-05 09:15:00	17	-5.37948	1				2008-12-05 09:15:00	179	25.127	1
2008-12-05 09:30:00	16	0	-1				2008-12-05 09:30:00	179	25.127	1
2008-12-05 09:45:00	17	-5.37948	1				2008-12-05 09:45:00	179	25.127	0
2008-12-05 10:00:00	16	0	0				2008-12-05 10:00:00	178	24.9512	-1
2008-12-05 10:15:00	16	0	-1				2008-12-05 10:15:00	176	24.601	-3
2008-12-05 10:30:00	16	0	0				2008-12-05 10:30:00	177	24.7758	-2
2008-12-05 10:45:00	16	0	-1				2008-12-05 10:45:00	178	24.9512	-1
2008-12-05 11:00:00	17	-5.37948	1				2008-12-05 11:00:00	179	25.127	1
2008-12-05 11:15:00	16	0	0				2008-12-05 11:15:00	179	25.127	3
2008-12-05 11:30:00	17	-5.37948	1				2008-12-05 11:30:00	179	25.127	2
2008-12-05 11:45:00	17	-5.37948	1				2008-12-05 11:45:00	179	25.127	1
2008-12-05 12:00:00	17	-5.37948	X				2008-12-05 12:00:00	178	24.9512	X
2008-12-05 12:15:00	16	0	X				2008-12-05 12:15:00	178	24.9512	X
2008-12-05 12:30:00	17	-5.37948	X				2008-12-05 12:30:00	179	25.127	X
2008-12-05 12:45:00	16	0	X				2008-12-05 12:45:00	177	24.7758	X
2008-12-05 13:00:00	17	-5.37948	0				2008-12-05 13:00:00	177	24.7758	-1
2008-12-05 13:15:00	16	0	0				2008-12-05 13:15:00	176	24.601	-2
2008-12-05 13:30:00	16	0	-1				2008-12-05 13:30:00	176	24.601	-3
2008-12-05 13:45:00	16	0	0				2008-12-05 13:45:00	177	24.7758	0
2008-12-05 14:00:00	17	-5.37948	0				2008-12-05 14:00:00	178	24.9512	1
2008-12-05 14:15:00	17	-5.37948	1				2008-12-05 14:15:00	179	25.127	3
2008-12-05 14:30:00	16	0	0				2008-12-05 14:30:00	176	24.601	0
2008-12-05 14:45:00	16	0	0				2008-12-05 14:45:00	177	24.7758	0
2008-12-05 15:00:00	16	0	-1				2008-12-05 15:00:00	177	24.7758	-1
2008-12-05 15:15:00	19	-16.1384	2				2008-12-05 15:15:00	178	24.9512	-1
2008-12-05 15:30:00	19	-16.1384	3				2008-12-05 15:30:00	178	24.9512	2
2008-12-05 15:45:00	17	-5.37948	1				2008-12-05 15:45:00	178	24.9512	1
2008-12-05 16:00:00	17	-5.37948	1				2008-12-05 16:00:00	179	25.127	2
2008-12-05 16:15:00	17	-5.37948	-2				2008-12-05 16:15:00	179	25.127	1
2008-12-05 16:30:00	17	-5.37948	-2				2008-12-05 16:30:00	179	25.127	1
2008-12-05 16:45:00	17	-5.37948	0				2008-12-05 16:45:00	179	25.127	1
2008-12-05 17:00:00	17	-5.37948	0				2008-12-05 17:00:00	179	25.127	0
2008-12-05 17:15:00	17	-5.37948	0				2008-12-05 17:15:00	179	25.127	0
2008-12-05 17:30:00	17	-5.37948	0				2008-12-05 17:30:00	179	25.127	0
2008-12-05 17:45:00	17	-5.37948	0				2008-12-05 17:45:00	179	25.127	0
2008-12-05 18:00:00	17	-5.37948	X				2008-12-05 18:00:00	179	25.127	X
2008-12-05 18:15:00	17	-5.37948	X				2008-12-05 18:15:00	179	25.127	X
2008-12-05 18:30:00	17	-5.37948	X				2008-12-05 18:30:00	179	25.127	X
2008-12-05 18:45:00	17	-5.37948	X				2008-12-05 18:45:00	179	25.127	X
2008-12-05 19:00:00	17	-5.37948	0				2008-12-05 19:00:00	179	25.127	0
2008-12-05 19:15:00	17	-5.37948	0				2008-12-05 19:15:00	179	25.127	0
2008-12-05 19:30:00	17	-5.37948	0				2008-12-05 19:30:00	179	25.127	0
2008-12-05 19:45:00	17	-5.37948	0				2008-12-05 19:45:00	179	25.127	0
2008-12-05 20:00:00	17	-5.37948	0				2008-12-05 20:00:00	180	25.3034	1
2008-12-05 20:15:00	17	-5.37948	0				2008-12-05 20:15:00	180	25.3034	1
2008-12-05 20:30:00	17	-5.37948	0				2008-12-05 20:30:00	180	25.3034	1
2008-12-05 20:45:00	17	-5.37948	0				2008-12-05 20:45:00	180	25.3034	1
2008-12-05 21:00:00	17	-5.37948	0				2008-12-05 21:00:00	180	25.3034	0
2008-12-05 21:15:00	17	-5.37948	0				2008-12-05 21:15:00	180	25.3034	0
2008-12-05 21:30:00	17	-5.37948	0				2008-12-05 21:30:00	180	25.3034	0
2008-12-05 21:45:00	17	-5.37948	0				2008-12-05 21:45:00	180	25.3034	0
2008-12-05 22:00:00	17	-5.37948	0				2008-12-05 22:00:00	180	25.3034	0
2008-12-05 22:15:00	17	-5.37948	0				2008-12-05 22:15:00	180	25.3034	0
2008-12-05 22:30:00	17	-5.37948	0				2008-12-05 22:30:00	180	25.3034	0
2008-12-05 22:45:00	17	-5.37948	0				2008-12-05 22:45:00	180	25.3034	0
2008-12-05 23:00:00	17	-5.37948	0				2008-12-05 23:00:00	180	25.3034	0
2008-12-05 23:15:00	17	-5.37948	0				2008-12-05 23:15:00	181	25.4803	1
2008-12-05 23:30:00	17	-5.37948	0				2008-12-05 23:30:00	180	25.3034	0
2008-12-05 23:45:00	17	-5.37948	0				2008-12-05 23:45:00	181	25.4803	1
2008-12-06	17	-5.37948	X				2008-12-06	180	25.3034	X
2008-12-06 00:15:00	17	-5.37948	X				2008-12-06 00:15:00	180	25.3034	X
2008-12-06 00:30:00	17	-5.37948	X				2008-12-06 00:30:00	180	25.3034	X
2008-12-06 00:45:00	17	-5.37948	X				2008-12-06 00:45:00	180	25.3034	X
2008-12-06 01:00:00	17	-5.37948	0				2008-12-06 01:00:00	180	25.3034	0
2008-12-06 01:15:00	17	-5.37948	0				2008-12-06 01:15:00	181	25.4803	1
2008-12-06 01:30:00	17	-5.37948	0				2008-12-06 01:30:00	180	25.3034	0
2008-12-06 01:45:00	17	-5.37948	0				2008-12-06 01:45:00	179	25.127	-1
2008-12-06 02:00:00	17	-5.37948	0				2008-12-06 02:00:00	179	25.127	-1
2008-12-06 02:15:00	17	-5.37948	0				2008-12-06 02:15:00	179	25.127	-2
2008-12-06 02:30:00	17	-5.37948	0				2008-12-06 02:30:00	179	25.127	-1
2008-12-06 02:45:00	17	-5.37948	0				2008-12-06 02:45:00	179	25.127	0
2008-12-06 03:00:00	17	-5.37948	0				2008-12-06 03:00:00	179	25.127	0
2008-12-06 03:15:00	17	-5.37948	0				2008-12-06 03:15:00	179	25.127	0
2008-12-06 03:30:00	17	-5.37948	0				2008-12-06 03:30:00	179	25.127	0
2008-12-06 03:45:00	18	-10.759	1				2008-12-06 03:45:00	180	25.3034	1
2008-12-06 04:00:00	17	-5.37948	0				2008-12-06 04:00:00	180	25.3034	1
2008-12-06 04:15:00	17	-5.37948	0				2008-12-06 04:15:00	179	25.127	0
2008-12-06 04:30:00	17	-5.37948	0				2008-12-06 04:30:00	179	25.127	0
2008-12-06 04:45:00	19	-16.1384	1				2008-12-06 04:45:00	179	25.127	-1
2008-12-06 05:00:00	17	-5.37948	0				2008-12-06 05:00:00	179	25.127	-1
2008-12-06 05:15:00	17	-5.37948	0				2008-12-06 05:15:00	179	25.127	0
2008-12-06 05:30:00	19	-16.1384	2				2008-12-06 05:30:00	179	25.127	0
2008-12-06 05:45:00	17	-5.37948	-2				2008-12-06 05:45:00	179	25.127	0
2008-12-06 06:00:00	17	-5.37948	X				2008-12-06 06:00:00	179	25.127	X
2008-12-06 06:15:00	17	-5.37948	X				2008-12-06 06:15:00	179	25.127	X
2008-12-06 06:30:00	17	-5.37948	X				2008-12-06 06:30:00	179	25.127	X
2008-12-06 06:45:00	17	-5.37948	X				2008-12-06 06:45:00	179	25.127	X
2008-12-06 07:00:00	17	-5.37948	0				2008-12-06 07:00:00	179	25.127	0
2008-12-06 07:15:00	17	-5.37948	0				2008-12-06 07:15:00	179	25.127	0
2008-12-06 07:30:00	18	-10.759	1				2008-12-06 07:30:00	179	25.127	0
2008-12-06 07:45:00	17	-5.37948	0				2008-12-06 07:45:00	179	25.127	0
2008-12-06 08:00:00	17	-5.37948	0				2008-12-06 08:00:00	179	25.127	0
2008-12-06 08:15:00	17	-5.37948	0				2008-12-06 08:15:00	179	25.127	0
2008-12-06 08:30:00	17	-5.37948	-1				2008-12-06 08:30:00	178	24.9512	-1
2008-12-06 08:45:00	16	0	-1				2008-12-06 08:45:00	178	24.9512	-1
2008-12-06 09:00:00	17	-5.37948	0				2008-12-06 09:00:00	179	25.127	0
2008-12-06 09:15:00	17	-5.37948	0				2008-12-06 09:15:00	179	25.127	0
2008-12-06 09:30:00	17	-5.37948	0				2008-12-06 09:30:00	179	25.127	1
2008-12-06 09:45:00	17	-5.37948	1				2008-12-06 09:45:00	179	25.127	1
2008-12-06 10:00:00	17	-5.37948	0				2008-12-06 10:00:00	179	25.127	0
2008-12-06 10:15:00	17	-5.37948	0				2008-12-06 10:15:00	178	24.9512	-1
2008-12-06 10:30:00	16	0	-1				2008-12-06 10:30:00	177	24.7758	-2
2008-12-06 10:45:00	17	-5.37948	0				2008-12-06 10:45:00	178	24.9512	-1
2008-12-06 11:00:00	17	-5.37948	0				2008-12-06 11:00:00	179	25.127	0
2008-12-06 11:15:00	16	0	-1				2008-12-06 11:15:00	179	25.127	1
2008-12-06 11:30:00	18	-10.759	2				2008-12-06 11:30:00	179	25.127	2
2008-12-06 11:45:00	18	-10.759	1				2008-12-06 11:45:00	179	25.127	1
2008-12-06 12:00:00	17	-5.37948	X				2008-12-06 12:00:00	179	25.127	X
2008-12-06 12:15:00	18	-10.759	X				2008-12-06 12:15:00	179	25.127	X
2008-12-06 12:30:00	17	-5.37948	X				2008-12-06 12:30:00	179	25.127	X
2008-12-06 12:45:00	17	-5.37948	X				2008-12-06 12:45:00	179	25.127	X
2008-12-06 13:00:00	17	-5.37948	0				2008-12-06 13:00:00	178	24.9512	-1
2008-12-06 13:15:00	17	-5.37948	-1				2008-12-06 13:15:00	177	24.7758	-2
2008-12-06 13:30:00	17	-5.37948	0				2008-12-06 13:30:00	178	24.9512	-1
2008-12-06 13:45:00	17	-5.37948	0				2008-12-06 13:45:00	178	24.9512	-1
2008-12-06 14:00:00	17	-5.37948	0				2008-12-06 14:00:00	179	25.127	1
2008-12-06 14:15:00	17	-5.37948	0				2008-12-06 14:15:00	179	25.127	2
2008-12-06 14:30:00	17	-5.37948	0				2008-12-06 14:30:00	178	24.9512	0
2008-12-06 14:45:00	17	-5.37948	0				2008-12-06 14:45:00	178	24.9512	0
2008-12-06 15:00:00	17	-5.37948	0				2008-12-06 15:00:00	178	24.9512	-1
2008-12-06 15:15:00	17	-5.37948	0				2008-12-06 15:15:00	178	24.9512	-1
2008-12-06 15:30:00	17	-5.37948	0				2008-12-06 15:30:00	178	24.9512	0
2008-12-06 15:45:00	17	-5.37948	0				2008-12-06 15:45:00	178	24.9512	0
2008-12-06 16:00:00	17	-5.37948	0				2008-12-06 16:00:00	178	24.9512	0
2008-12-06 16:15:00	17	-5.37948	0				2008-12-06 16:15:00	178	24.9512	0
2008-12-06 16:30:00	17	-5.37948	0				2008-12-06 16:30:00	178	24.9512	0
2008-12-06 16:45:00	17	-5.37948	0				2008-12-06 16:45:00	178	24.9512	0
2008-12-06 17:00:00	17	-5.37948	0				2008-12-06 17:00:00	179	25.127	1
2008-12-06 17:15:00	17	-5.37948	0				2008-12-06 17:15:00	179	25.127	1
2008-12-06 17:30:00	17	-5.37948	0				2008-12-06 17:30:00	179	25.127	1
2008-12-06 17:45:00	17	-5.37948	0				2008-12-06 17:45:00	179	25.127	1
2008-12-06 18:00:00	17	-5.37948	X				2008-12-06 18:00:00	179	25.127	X
2008-12-06 18:15:00	18	-10.759	X				2008-12-06 18:15:00	179	25.127	X
2008-12-06 18:30:00	17	-5.37948	X				2008-12-06 18:30:00	179	25.127	X
2008-12-06 18:45:00	17	-5.37948	X				2008-12-06 18:45:00	179	25.127	X
2008-12-06 19:00:00	17	-5.37948	0				2008-12-06 19:00:00	179	25.127	0
2008-12-06 19:15:00	20	-21.5179	2				2008-12-06 19:15:00	179	25.127	0
2008-12-06 19:30:00	20	-21.5179	3				2008-12-06 19:30:00	179	25.127	0
2008-12-06 19:45:00	20	-21.5179	3				2008-12-06 19:45:00	179	25.127	0
2008-12-06 20:00:00	17	-5.37948	0				2008-12-06 20:00:00	180	25.3034	1
2008-12-06 20:15:00	17	-5.37948	-3				2008-12-06 20:15:00	180	25.3034	1
2008-12-06 20:30:00	17	-5.37948	-3				2008-12-06 20:30:00	181	25.4803	2
2008-12-06 20:45:00	17	-5.37948	-3				2008-12-06 20:45:00	181	25.4803	2
2008-12-06 21:00:00	17	-5.37948	0				2008-12-06 21:00:00	180	25.3034	0
2008-12-06 21:15:00	17	-5.37948	0				2008-12-06 21:15:00	179	25.127	-1
2008-12-06 21:30:00	17	-5.37948	0				2008-12-06 21:30:00	180	25.3034	-1
2008-12-06 21:45:00	17	-5.37948	0				2008-12-06 21:45:00	181	25.4803	0
2008-12-06 22:00:00	17	-5.37948	0				2008-12-06 22:00:00	181	25.4803	1
2008-12-06 22:15:00	17	-5.37948	0				2008-12-06 22:15:00	181	25.4803	2
2008-12-06 22:30:00	17	-5.37948	0				2008-12-06 22:30:00	180	25.3034	0
2008-12-06 22:45:00	17	-5.37948	0				2008-12-06 22:45:00	180	25.3034	-1
2008-12-06 23:00:00	17	-5.37948	0				2008-12-06 23:00:00	180	25.3034	-1
2008-12-06 23:15:00	17	-5.37948	0				2008-12-06 23:15:00	180	25.3034	-1
2008-12-06 23:30:00	17	-5.37948	0				2008-12-06 23:30:00	180	25.3034	0
2008-12-06 23:45:00	17	-5.37948	0				2008-12-06 23:45:00	180	25.3034	0
2008-12-07	17	-5.37948	X				2008-12-07	180	25.3034	X
2008-12-07 00:15:00	17	-5.37948	X				2008-12-07 00:15:00	180	25.3034	X
2008-12-07 00:30:00	20	-21.5179	X				2008-12-07 00:30:00	179	25.127	X
2008-12-07 00:45:00	17	-5.37948	X				2008-12-07 00:45:00	179	25.127	X
2008-12-07 01:00:00	17	-5.37948	0				2008-12-07 01:00:00	179	25.127	-1
2008-12-07 01:15:00	17	-5.37948	0				2008-12-07 01:15:00	179	25.127	-1
2008-12-07 01:30:00	17	-5.37948	-3				2008-12-07 01:30:00	179	25.127	0
2008-12-07 01:45:00	17	-5.37948	0				2008-12-07 01:45:00	179	25.127	0
2008-12-07 02:00:00	17	-5.37948	0				2008-12-07 02:00:00	179	25.127	0
2008-12-07 02:15:00	17	-5.37948	0				2008-12-07 02:15:00	179	25.127	0
2008-12-07 02:30:00	17	-5.37948	0				2008-12-07 02:30:00	179	25.127	0
2008-12-07 02:45:00	17	-5.37948	0				2008-12-07 02:45:00	179	25.127	0
2008-12-07 03:00:00	17	-5.37948	0				2008-12-07 03:00:00	179	25.127	0
2008-12-07 03:15:00	17	-5.37948	0				2008-12-07 03:15:00	179	25.127	0
2008-12-07 03:30:00	17	-5.37948	0				2008-12-07 03:30:00	179	25.127	0
2008-12-07 03:45:00	17	-5.37948	0				2008-12-07 03:45:00	179	25.127	0
2008-12-07 04:00:00	17	-5.37948	0				2008-12-07 04:00:00	179	25.127	0
2008-12-07 04:15:00	17	-5.37948	0				2008-12-07 04:15:00	180	25.3034	1
2008-12-07 04:30:00	18	-10.759	1				2008-12-07 04:30:00	179	25.127	0
2008-12-07 04:45:00	19	-16.1384	2				2008-12-07 04:45:00	180	25.3034	1
2008-12-07 05:00:00	17	-5.37948	0				2008-12-07 05:00:00	179	25.127	0
2008-12-07 05:15:00	17	-5.37948	0				2008-12-07 05:15:00	180	25.3034	0
2008-12-07 05:30:00	19	-16.1384	1				2008-12-07 05:30:00	179	25.127	0
2008-12-07 05:45:00	17	-5.37948	-2				2008-12-07 05:45:00	179	25.127	-1
2008-12-07 06:00:00	19	-16.1384	X				2008-12-07 06:00:00	179	25.127	X
2008-12-07 06:15:00	19	-16.1384	X				2008-12-07 06:15:00	179	25.127	X
2008-12-07 06:30:00	19	-16.1384	X				2008-12-07 06:30:00	179	25.127	X
2008-12-07 06:45:00	17	-5.37948	X				2008-12-07 06:45:00	179	25.127	X
2008-12-07 07:00:00	17	-5.37948	-2				2008-12-07 07:00:00	179	25.127	0
2008-12-07 07:15:00	17	-5.37948	-2				2008-12-07 07:15:00	179	25.127	0
2008-12-07 07:30:00	17	-5.37948	-2				2008-12-07 07:30:00	179	25.127	0
2008-12-07 07:45:00	17	-5.37948	0				2008-12-07 07:45:00	179	25.127	0
2008-12-07 08:00:00	20	-21.5179	3				2008-12-07 08:00:00	179	25.127	0
2008-12-07 08:15:00	17	-5.37948	0				2008-12-07 08:15:00	179	25.127	0
2008-12-07 08:30:00	19	-16.1384	2				2008-12-07 08:30:00	179	25.127	0
2008-12-07 08:45:00	17	-5.37948	0				2008-12-07 08:45:00	179	25.127	0
2008-12-07 09:00:00	17	-5.37948	-3				2008-12-07 09:00:00	179	25.127	0
2008-12-07 09:15:00	17	-5.37948	0				2008-12-07 09:15:00	179	25.127	0
2008-12-07 09:30:00	16	0	-3				2008-12-07 09:30:00	179	25.127	0
2008-12-07 09:45:00	17	-5.37948	0				2008-12-07 09:45:00	179	25.127	0
2008-12-07 10:00:00	20	-21.5179	3				2008-12-07 10:00:00	179	25.127	0
2008-12-07 10:15:00	20	-21.5179	3				2008-12-07 10:15:00	179	25.127	0
2008-12-07 10:30:00	18	-10.759	2				2008-12-07 10:30:00	179	25.127	0
2008-12-07 10:45:00	20	-21.5179	3				2008-12-07 10:45:00	179	25.127	0
2008-12-07 11:00:00	17	-5.37948	-3				2008-12-07 11:00:00	179	25.127	0
2008-12-07 11:15:00	21	-26.8974	1				2008-12-07 11:15:00	179	25.127	0
2008-12-07 11:30:00	19	-16.1384	1				2008-12-07 11:30:00	179	25.127	0
2008-12-07 11:45:00	17	-5.37948	-3				2008-12-07 11:45:00	179	25.127	0
2008-12-07 12:00:00	17	-5.37948	X				2008-12-07 12:00:00	179	25.127	X
2008-12-07 12:15:00	19	-16.1384	X				2008-12-07 12:15:00	179	25.127	X
2008-12-07 12:30:00	17	-5.37948	X				2008-12-07 12:30:00	179	25.127	X
2008-12-07 12:45:00	17	-5.37948	X				2008-12-07 12:45:00	179	25.127	X
2008-12-07 13:00:00	17	-5.37948	0				2008-12-07 13:00:00	179	25.127	0
2008-12-07 13:15:00	17	-5.37948	-2				2008-12-07 13:15:00	179	25.127	0
2008-12-07 13:30:00	17	-5.37948	0				2008-12-07 13:30:00	179	25.127	0
2008-12-07 13:45:00	17	-5.37948	0				2008-12-07 13:45:00	179	25.127	0
2008-12-07 14:00:00	17	-5.37948	0				2008-12-07 14:00:00	179	25.127	0
2008-12-07 14:15:00	17	-5.37948	0				2008-12-07 14:15:00	178	24.9512	-1
2008-12-07 14:30:00	17	-5.37948	0				2008-12-07 14:30:00	178	24.9512	-1
2008-12-07 14:45:00	18	-10.759	1				2008-12-07 14:45:00	179	25.127	0
2008-12-07 15:00:00	17	-5.37948	0				2008-12-07 15:00:00	179	25.127	0
2008-12-07 15:15:00	17	-5.37948	0				2008-12-07 15:15:00	179	25.127	1
2008-12-07 15:30:00	17	-5.37948	0				2008-12-07 15:30:00	179	25.127	1
2008-12-07 15:45:00	17	-5.37948	-1				2008-12-07 15:45:00	178	24.9512	-1
2008-12-07 16:00:00	17	-5.37948	0				2008-12-07 16:00:00	178	24.9512	-1
2008-12-07 16:15:00	16	0	-1				2008-12-07 16:15:00	178	24.9512	-1
2008-12-07 16:30:00	17	-5.37948	0				2008-12-07 16:30:00	179	25.127	0
2008-12-07 16:45:00	16	0	-1				2008-12-07 16:45:00	179	25.127	1
2008-12-07 17:00:00	17	-5.37948	0				2008-12-07 17:00:00	179	25.127	1
2008-12-07 17:15:00	16	0	0				2008-12-07 17:15:00	179	25.127	1
2008-12-07 17:30:00	17	-5.37948	0				2008-12-07 17:30:00	179	25.127	0
2008-12-07 17:45:00	18	-10.759	2				2008-12-07 17:45:00	179	25.127	0
2008-12-07 18:00:00	17	-5.37948	X				2008-12-07 18:00:00	179	25.127	X
2008-12-07 18:15:00	17	-5.37948	X				2008-12-07 18:15:00	178	24.9512	X
2008-12-07 18:30:00	18	-10.759	X				2008-12-07 18:30:00	178	24.9512	X
2008-12-07 18:45:00	17	-5.37948	X				2008-12-07 18:45:00	179	25.127	X
2008-12-07 19:00:00	17	-5.37948	0				2008-12-07 19:00:00	179	25.127	0
2008-12-07 19:15:00	17	-5.37948	0				2008-12-07 19:15:00	179	25.127	1
2008-12-07 19:30:00	17	-5.37948	-1				2008-12-07 19:30:00	179	25.127	1
2008-12-07 19:45:00	17	-5.37948	0				2008-12-07 19:45:00	179	25.127	0
2008-12-07 20:00:00	17	-5.37948	0				2008-12-07 20:00:00	178	24.9512	-1
2008-12-07 20:15:00	17	-5.37948	0				2008-12-07 20:15:00	179	25.127	0
2008-12-07 20:30:00	17	-5.37948	0				2008-12-07 20:30:00	177	24.7758	-2
2008-12-07 20:45:00	17	-5.37948	0				2008-12-07 20:45:00	179	25.127	0
2008-12-07 21:00:00	17	-5.37948	0				2008-12-07 21:00:00	179	25.127	1
2008-12-07 21:15:00	17	-5.37948	0				2008-12-07 21:15:00	180	25.3034	1
2008-12-07 21:30:00	17	-5.37948	0				2008-12-07 21:30:00	180	25.3034	3
2008-12-07 21:45:00	17	-5.37948	0				2008-12-07 21:45:00	181	25.4803	2
2008-12-07 22:00:00	16	0	-1				2008-12-07 22:00:00	181	25.4803	2
2008-12-07 22:15:00	19	-16.1384	2				2008-12-07 22:15:00	179	25.127	-1
2008-12-07 22:30:00	17	-5.37948	0				2008-12-07 22:30:00	180	25.3034	0
2008-12-07 22:45:00	17	-5.37948	0				2008-12-07 22:45:00	180	25.3034	-1
2008-12-07 23:00:00	17	-5.37948	1				2008-12-07 23:00:00	180	25.3034	-1
2008-12-07 23:15:00	20	-21.5179	1				2008-12-07 23:15:00	179	25.127	0
2008-12-07 23:30:00	17	-5.37948	0				2008-12-07 23:30:00	180	25.3034	0
2008-12-07 23:45:00	17	-5.37948	0				2008-12-07 23:45:00	180	25.3034	0
2008-12-08	17	-5.37948	X				2008-12-08	180	25.3034	X
2008-12-08 00:15:00	17	-5.37948	X				2008-12-08 00:15:00	180	25.3034	X
2008-12-08 00:30:00	17	-5.37948	X				2008-12-08 00:30:00	180	25.3034	X
2008-12-08 00:45:00	17	-5.37948	X				2008-12-08 00:45:00	179	25.127	X
2008-12-08 01:00:00	16	0	-1				2008-12-08 01:00:00	180	25.3034	0
2008-12-08 01:15:00	17	-5.37948	0				2008-12-08 01:15:00	180	25.3034	0
2008-12-08 01:30:00	17	-5.37948	0				2008-12-08 01:30:00	180	25.3034	0
2008-12-08 01:45:00	17	-5.37948	0				2008-12-08 01:45:00	180	25.3034	1
2008-12-08 02:00:00	17	-5.37948	1				2008-12-08 02:00:00	180	25.3034	0
2008-12-08 02:15:00	17	-5.37948	0				2008-12-08 02:15:00	179	25.127	-1
2008-12-08 02:30:00	17	-5.37948	0				2008-12-08 02:30:00	179	25.127	-1
2008-12-08 02:45:00	17	-5.37948	0				2008-12-08 02:45:00	179	25.127	-1
2008-12-08 03:00:00	17	-5.37948	0				2008-12-08 03:00:00	179	25.127	-1
2008-12-08 03:15:00	16	0	-1				2008-12-08 03:15:00	179	25.127	0
2008-12-08 03:30:00	17	-5.37948	0				2008-12-08 03:30:00	179	25.127	0
2008-12-08 03:45:00	17	-5.37948	0				2008-12-08 03:45:00	178	24.9512	-1
2008-12-08 04:00:00	17	-5.37948	0				2008-12-08 04:00:00	178	24.9512	-1
2008-12-08 04:15:00	17	-5.37948	1				2008-12-08 04:15:00	178	24.9512	-1
2008-12-08 04:30:00	17	-5.37948	0				2008-12-08 04:30:00	178	24.9512	-1
2008-12-08 04:45:00	17	-5.37948	0				2008-12-08 04:45:00	179	25.127	1
2008-12-08 05:00:00	16	0	-1				2008-12-08 05:00:00	179	25.127	1
2008-12-08 05:15:00	16	0	-1				2008-12-08 05:15:00	177	24.7758	-1
2008-12-08 05:30:00	16	0	-1				2008-12-08 05:30:00	178	24.9512	0
2008-12-08 05:45:00	16	0	-1				2008-12-08 05:45:00	178	24.9512	-1
2008-12-08 06:00:00	16	0	X				2008-12-08 06:00:00	178	24.9512	X
2008-12-08 06:15:00	16	0	X				2008-12-08 06:15:00	178	24.9512	X
2008-12-08 06:30:00	17	-5.37948	X				2008-12-08 06:30:00	179	25.127	X
2008-12-08 06:45:00	17	-5.37948	X				2008-12-08 06:45:00	179	25.127	X
2008-12-08 07:00:00	16	0	0				2008-12-08 07:00:00	178	24.9512	0
2008-12-08 07:15:00	17	-5.37948	1				2008-12-08 07:15:00	178	24.9512	0
2008-12-08 07:30:00	17	-5.37948	0				2008-12-08 07:30:00	178	24.9512	-1
2008-12-08 07:45:00	17	-5.37948	0				2008-12-08 07:45:00	178	24.9512	-1
2008-12-08 08:00:00	17	-5.37948	1				2008-12-08 08:00:00	178	24.9512	0
2008-12-08 08:15:00	16	0	-1				2008-12-08 08:15:00	178	24.9512	0
2008-12-08 08:30:00	16	0	-1				2008-12-08 08:30:00	178	24.9512	0
2008-12-08 08:45:00	17	-5.37948	0				2008-12-08 08:45:00	176	24.601	-2
2008-12-08 09:00:00	16	0	-1				2008-12-08 09:00:00	178	24.9512	0
2008-12-08 09:15:00	17	-5.37948	1				2008-12-08 09:15:00	177	24.7758	-1
2008-12-08 09:30:00	17	-5.37948	1				2008-12-08 09:30:00	178	24.9512	0
2008-12-08 09:45:00	17	-5.37948	0				2008-12-08 09:45:00	179	25.127	3
2008-12-08 10:00:00	17	-5.37948	1				2008-12-08 10:00:00	178	24.9512	0
2008-12-08 10:15:00	16	0	-1				2008-12-08 10:15:00	179	25.127	2
2008-12-08 10:30:00	17	-5.37948	0				2008-12-08 10:30:00	179	25.127	1
2008-12-08 10:45:00	17	-5.37948	0				2008-12-08 10:45:00	179	25.127	0
2008-12-08 11:00:00	17	-5.37948	0				2008-12-08 11:00:00	178	24.9512	0
2008-12-08 11:15:00	17	-5.37948	1				2008-12-08 11:15:00	178	24.9512	-1
2008-12-08 11:30:00	17	-5.37948	0				2008-12-08 11:30:00	179	25.127	0
2008-12-08 11:45:00	17	-5.37948	0				2008-12-08 11:45:00	178	24.9512	-1
2008-12-08 12:00:00	17	-5.37948	X				2008-12-08 12:00:00	178	24.9512	X
2008-12-08 12:15:00	17	-5.37948	X				2008-12-08 12:15:00	178	24.9512	X
2008-12-08 12:30:00	18	-10.759	X				2008-12-08 12:30:00	178	24.9512	X
2008-12-08 12:45:00	17	-5.37948	X				2008-12-08 12:45:00	178	24.9512	X
2008-12-08 13:00:00	16	0	-1				2008-12-08 13:00:00	176	24.601	-2
2008-12-08 13:15:00	17	-5.37948	0				2008-12-08 13:15:00	178	24.9512	0
2008-12-08 13:30:00	17	-5.37948	-1				2008-12-08 13:30:00	178	24.9512	0
2008-12-08 13:45:00	17	-5.37948	0				2008-12-08 13:45:00	178	24.9512	0
2008-12-08 14:00:00	17	-5.37948	1				2008-12-08 14:00:00	177	24.7758	1
2008-12-08 14:15:00	16	0	-1				2008-12-08 14:15:00	177	24.7758	-1
2008-12-08 14:30:00	17	-5.37948	0				2008-12-08 14:30:00	176	24.601	-2
2008-12-08 14:45:00	17	-5.37948	0				2008-12-08 14:45:00	177	24.7758	-1
2008-12-08 15:00:00	16	0	-1				2008-12-08 15:00:00	177	24.7758	0
2008-12-08 15:15:00	17	-5.37948	1				2008-12-08 15:15:00	177	24.7758	0
2008-12-08 15:30:00	17	-5.37948	0				2008-12-08 15:30:00	177	24.7758	1
2008-12-08 15:45:00	16	0	-1				2008-12-08 15:45:00	177	24.7758	0
2008-12-08 16:00:00	17	-5.37948	1				2008-12-08 16:00:00	177	24.7758	0
2008-12-08 16:15:00	16	0	-1				2008-12-08 16:15:00	177	24.7758	0
2008-12-08 16:30:00	17	-5.37948	0				2008-12-08 16:30:00	177	24.7758	0
2008-12-08 16:45:00	16	0	0				2008-12-08 16:45:00	178	24.9512	1
2008-12-08 17:00:00	16	0	-1				2008-12-08 17:00:00	178	24.9512	1
2008-12-08 17:15:00	17	-5.37948	1				2008-12-08 17:15:00	178	24.9512	1
2008-12-08 17:30:00	17	-5.37948	0				2008-12-08 17:30:00	178	24.9512	1
2008-12-08 17:45:00	16	0	0				2008-12-08 17:45:00	179	25.127	1
2008-12-08 18:00:00	16	0	X				2008-12-08 18:00:00	179	25.127	X
2008-12-08 18:15:00	16	0	X				2008-12-08 18:15:00	179	25.127	X
2008-12-08 18:30:00	17	-5.37948	X				2008-12-08 18:30:00	180	25.3034	X
2008-12-08 18:45:00	17	-5.37948	X				2008-12-08 18:45:00	179	25.127	X
2008-12-08 19:00:00	16	0	0				2008-12-08 19:00:00	180	25.3034	1
2008-12-08 19:15:00	16	0	0				2008-12-08 19:15:00	180	25.3034	1
2008-12-08 19:30:00	16	0	-1				2008-12-08 19:30:00	181	25.4803	1
2008-12-08 19:45:00	16	0	-1				2008-12-08 19:45:00	182	25.6577	3
2008-12-08 20:00:00	17	-5.37948	1				2008-12-08 20:00:00	181	25.4803	1
2008-12-08 20:15:00	17	-5.37948	1				2008-12-08 20:15:00	181	25.4803	1
2008-12-08 20:30:00	16	0	0				2008-12-08 20:30:00	181	25.4803	0
2008-12-08 20:45:00	17	-5.37948	1				2008-12-08 20:45:00	181	25.4803	-1
2008-12-08 21:00:00	17	-5.37948	0				2008-12-08 21:00:00	181	25.4803	0
2008-12-08 21:15:00	16	0	-1				2008-12-08 21:15:00	182	25.6577	1
2008-12-08 21:30:00	16	0	0				2008-12-08 21:30:00	182	25.6577	1
2008-12-08 21:45:00	16	0	-1				2008-12-08 21:45:00	183	25.8357	2
2008-12-08 22:00:00	16	0	-1				2008-12-08 22:00:00	182	25.6577	1
2008-12-08 22:15:00	16	0	0				2008-12-08 22:15:00	182	25.6577	0
2008-12-08 22:30:00	17	-5.37948	1				2008-12-08 22:30:00	181	25.4803	-1
2008-12-08 22:45:00	17	-5.37948	1				2008-12-08 22:45:00	181	25.4803	-2
2008-12-08 23:00:00	17	-5.37948	1				2008-12-08 23:00:00	181	25.4803	-1
2008-12-08 23:15:00	17	-5.37948	1				2008-12-08 23:15:00	181	25.4803	-1
2008-12-08 23:30:00	17	-5.37948	0				2008-12-08 23:30:00	181	25.4803	0
2008-12-08 23:45:00	17	-5.37948	0				2008-12-08 23:45:00	181	25.4803	0
2008-12-09	17	-5.37948	X				2008-12-09	181	25.4803	X
2008-12-09 00:15:00	17	-5.37948	X				2008-12-09 00:15:00	181	25.4803	X
2008-12-09 00:30:00	17	-5.37948	X				2008-12-09 00:30:00	181	25.4803	X
2008-12-09 00:45:00	17	-5.37948	X				2008-12-09 00:45:00	179	25.127	X
2008-12-09 01:00:00	17	-5.37948	0				2008-12-09 01:00:00	181	25.4803	0
2008-12-09 01:15:00	17	-5.37948	0				2008-12-09 01:15:00	181	25.4803	0
2008-12-09 01:30:00	17	-5.37948	0				2008-12-09 01:30:00	180	25.3034	-1
2008-12-09 01:45:00	17	-5.37948	0				2008-12-09 01:45:00	180	25.3034	1
2008-12-09 02:00:00	16	0	-1				2008-12-09 02:00:00	180	25.3034	-1
2008-12-09 02:15:00	17	-5.37948	0				2008-12-09 02:15:00	180	25.3034	-1
2008-12-09 02:30:00	17	-5.37948	0				2008-12-09 02:30:00	180	25.3034	0
2008-12-09 02:45:00	17	-5.37948	0				2008-12-09 02:45:00	180	25.3034	0
2008-12-09 03:00:00	17	-5.37948	1				2008-12-09 03:00:00	180	25.3034	0
2008-12-09 03:15:00	17	-5.37948	0				2008-12-09 03:15:00	180	25.3034	0
2008-12-09 03:30:00	17	-5.37948	0				2008-12-09 03:30:00	180	25.3034	0
2008-12-09 03:45:00	17	-5.37948	0				2008-12-09 03:45:00	179	25.127	-1
2008-12-09 04:00:00	17	-5.37948	0				2008-12-09 04:00:00	179	25.127	-1
2008-12-09 04:15:00	17	-5.37948	0				2008-12-09 04:15:00	179	25.127	-1
2008-12-09 04:30:00	16	0	-1				2008-12-09 04:30:00	180	25.3034	0
2008-12-09 04:45:00	17	-5.37948	0				2008-12-09 04:45:00	179	25.127	0
2008-12-09 05:00:00	17	-5.37948	0				2008-12-09 05:00:00	179	25.127	0
2008-12-09 05:15:00	17	-5.37948	0				2008-12-09 05:15:00	179	25.127	0
2008-12-09 05:30:00	17	-5.37948	1				2008-12-09 05:30:00	179	25.127	-1
2008-12-09 05:45:00	17	-5.37948	0				2008-12-09 05:45:00	179	25.127	0
2008-12-09 06:00:00	17	-5.37948	X				2008-12-09 06:00:00	179	25.127	X
2008-12-09 06:15:00	17	-5.37948	X				2008-12-09 06:15:00	178	24.9512	X
2008-12-09 06:30:00	17	-5.37948	X				2008-12-09 06:30:00	179	25.127	X
2008-12-09 06:45:00	17	-5.37948	X				2008-12-09 06:45:00	178	24.9512	X
2008-12-09 07:00:00	17	-5.37948	0				2008-12-09 07:00:00	178	24.9512	-1
2008-12-09 07:15:00	16	0	-1				2008-12-09 07:15:00	177	24.7758	-1
2008-12-09 07:30:00	16	0	-1				2008-12-09 07:30:00	179	25.127	0
2008-12-09 07:45:00	17	-5.37948	0				2008-12-09 07:45:00	179	25.127	1
2008-12-09 08:00:00	17	-5.37948	0				2008-12-09 08:00:00	179	25.127	1
2008-12-09 08:15:00	16	0	0				2008-12-09 08:15:00	179	25.127	2
2008-12-09 08:30:00	17	-5.37948	1				2008-12-09 08:30:00	178	24.9512	-1
2008-12-09 08:45:00	17	-5.37948	0				2008-12-09 08:45:00	179	25.127	0
2008-12-09 09:00:00	17	-5.37948	0				2008-12-09 09:00:00	178	24.9512	-1
2008-12-09 09:15:00	17	-5.37948	1				2008-12-09 09:15:00	178	24.9512	-1
2008-12-09 09:30:00	17	-5.37948	0				2008-12-09 09:30:00	178	24.9512	0
2008-12-09 09:45:00	16	0	-1				2008-12-09 09:45:00	178	24.9512	-1
2008-12-09 10:00:00	16	0	-1				2008-12-09 10:00:00	178	24.9512	0
2008-12-09 10:15:00	16	0	-1				2008-12-09 10:15:00	177	24.7758	-1
2008-12-09 10:30:00	16	0	-1				2008-12-09 10:30:00	178	24.9512	0
2008-12-09 10:45:00	16	0	0				2008-12-09 10:45:00	178	24.9512	0
2008-12-09 11:00:00	16	0	0				2008-12-09 11:00:00	177	24.7758	-1
2008-12-09 11:15:00	16	0	0				2008-12-09 11:15:00	178	24.9512	1
2008-12-09 11:30:00	17	-5.37948	1				2008-12-09 11:30:00	177	24.7758	-1
2008-12-09 11:45:00	17	-5.37948	1				2008-12-09 11:45:00	176	24.601	-2
2008-12-09 12:00:00	16	0	X				2008-12-09 12:00:00	176	24.601	X
2008-12-09 12:15:00	16	0	X				2008-12-09 12:15:00	177	24.7758	X
2008-12-09 12:30:00	16	0	X				2008-12-09 12:30:00	176	24.601	X
2008-12-09 12:45:00	16	0	X				2008-12-09 12:45:00	176	24.601	X
2008-12-09 13:00:00	17	-5.37948	1				2008-12-09 13:00:00	177	24.7758	1
2008-12-09 13:15:00	16	0	0				2008-12-09 13:15:00	176	24.601	-1
2008-12-09 13:30:00	16	0	0				2008-12-09 13:30:00	175	24.4266	-1
2008-12-09 13:45:00	16	0	0				2008-12-09 13:45:00	175	24.4266	-1
2008-12-09 14:00:00	16	0	-1				2008-12-09 14:00:00	175	24.4266	-2
2008-12-09 14:15:00	17	-5.37948	1				2008-12-09 14:15:00	176	24.601	0
2008-12-09 14:30:00	19	-16.1384	3				2008-12-09 14:30:00	177	24.7758	2
2008-12-09 14:45:00	20	-21.5179	4				2008-12-09 14:45:00	177	24.7758	2
2008-12-09 15:00:00	16	0	0				2008-12-09 15:00:00	175	24.4266	0
2008-12-09 15:15:00	16	0	-1				2008-12-09 15:15:00	175	24.4266	-1
2008-12-09 15:30:00	17	-5.37948	-2				2008-12-09 15:30:00	177	24.7758	0
2008-12-09 15:45:00	17	-5.37948	-3				2008-12-09 15:45:00	177	24.7758	0
2008-12-09 16:00:00	19	-16.1384	3				2008-12-09 16:00:00	177	24.7758	2
2008-12-09 16:15:00	17	-5.37948	1				2008-12-09 16:15:00	178	24.9512	3
2008-12-09 16:30:00	17	-5.37948	0				2008-12-09 16:30:00	178	24.9512	1
2008-12-09 16:45:00	17	-5.37948	0				2008-12-09 16:45:00	178	24.9512	1
2008-12-09 17:00:00	17	-5.37948	-2				2008-12-09 17:00:00	178	24.9512	1
2008-12-09 17:15:00	17	-5.37948	0				2008-12-09 17:15:00	178	24.9512	0
2008-12-09 17:30:00	18	-10.759	1				2008-12-09 17:30:00	177	24.7758	-1
2008-12-09 17:45:00	17	-5.37948	0				2008-12-09 17:45:00	177	24.7758	-1
2008-12-09 18:00:00	17	-5.37948	X				2008-12-09 18:00:00	178	24.9512	X
2008-12-09 18:15:00	19	-16.1384	X				2008-12-09 18:15:00	177	24.7758	X
2008-12-09 18:30:00	16	0	X				2008-12-09 18:30:00	177	24.7758	X
2008-12-09 18:45:00	16	0	X				2008-12-09 18:45:00	178	24.9512	X
2008-12-09 19:00:00	17	-5.37948	0				2008-12-09 19:00:00	178	24.9512	0
2008-12-09 19:15:00	16	0	-3				2008-12-09 19:15:00	178	24.9512	1
2008-12-09 19:30:00	17	-5.37948	1				2008-12-09 19:30:00	178	24.9512	1
2008-12-09 19:45:00	17	-5.37948	1				2008-12-09 19:45:00	178	24.9512	0
2008-12-09 20:00:00	16	0	-1				2008-12-09 20:00:00	178	24.9512	0
2008-12-09 20:15:00	17	-5.37948	1				2008-12-09 20:15:00	179	25.127	1
2008-12-09 20:30:00	17	-5.37948	0				2008-12-09 20:30:00	178	24.9512	0
2008-12-09 20:45:00	16	0	-1				2008-12-09 20:45:00	179	25.127	1
2008-12-09 21:00:00	17	-5.37948	1				2008-12-09 21:00:00	179	25.127	1
2008-12-09 21:15:00	16	0	-1				2008-12-09 21:15:00	179	25.127	0
2008-12-09 21:30:00	16	0	-1				2008-12-09 21:30:00	179	25.127	1
2008-12-09 21:45:00	17	-5.37948	1				2008-12-09 21:45:00	179	25.127	0
2008-12-09 22:00:00	17	-5.37948	0				2008-12-09 22:00:00	179	25.127	0
2008-12-09 22:15:00	16	0	0				2008-12-09 22:15:00	179	25.127	0
2008-12-09 22:30:00	17	-5.37948	1				2008-12-09 22:30:00	179	25.127	0
2008-12-09 22:45:00	16	0	-1				2008-12-09 22:45:00	179	25.127	0
2008-12-09 23:00:00	17	-5.37948	0				2008-12-09 23:00:00	179	25.127	0
2008-12-09 23:15:00	17	-5.37948	1				2008-12-09 23:15:00	179	25.127	0
2008-12-09 23:30:00	17	-5.37948	0				2008-12-09 23:30:00	179	25.127	0
2008-12-09 23:45:00	17	-5.37948	1				2008-12-09 23:45:00	179	25.127	0
2008-12-10	16	0	X				2008-12-10	179	25.127	X
2008-12-10 00:15:00	16	0	X				2008-12-10 00:15:00	178	24.9512	X
2008-12-10 00:30:00	16	0	X				2008-12-10 00:30:00	179	25.127	X
2008-12-10 00:45:00	16	0	X				2008-12-10 00:45:00	178	24.9512	X
2008-12-10 01:00:00	17	-5.37948	1				2008-12-10 01:00:00	178	24.9512	-1
2008-12-10 01:15:00	16	0	0				2008-12-10 01:15:00	178	24.9512	0
2008-12-10 01:30:00	16	0	0				2008-12-10 01:30:00	178	24.9512	-1
2008-12-10 01:45:00	16	0	0				2008-12-10 01:45:00	178	24.9512	0
2008-12-10 02:00:00	16	0	-1				2008-12-10 02:00:00	178	24.9512	0
2008-12-10 02:15:00	18	-10.759	2				2008-12-10 02:15:00	178	24.9512	0
2008-12-10 02:30:00	17	-5.37948	1				2008-12-10 02:30:00	177	24.7758	-1
2008-12-10 02:45:00	17	-5.37948	1				2008-12-10 02:45:00	178	24.9512	0
2008-12-10 03:00:00	16	0	0				2008-12-10 03:00:00	176	24.601	-2
2008-12-10 03:15:00	16	0	-2				2008-12-10 03:15:00	176	24.601	-2
2008-12-10 03:30:00	17	-5.37948	0				2008-12-10 03:30:00	176	24.601	-1
2008-12-10 03:45:00	16	0	-1				2008-12-10 03:45:00	176	24.601	-2
2008-12-10 04:00:00	17	-5.37948	1				2008-12-10 04:00:00	177	24.7758	1
2008-12-10 04:15:00	16	0	0				2008-12-10 04:15:00	177	24.7758	1
2008-12-10 04:30:00	16	0	-1				2008-12-10 04:30:00	176	24.601	0
2008-12-10 04:45:00	17	-5.37948	1				2008-12-10 04:45:00	176	24.601	0
2008-12-10 05:00:00	17	-5.37948	0				2008-12-10 05:00:00	176	24.601	-1
2008-12-10 05:15:00	16	0	0				2008-12-10 05:15:00	176	24.601	-1
2008-12-10 05:30:00	17	-5.37948	1				2008-12-10 05:30:00	176	24.601	0
2008-12-10 05:45:00	16	0	-1				2008-12-10 05:45:00	176	24.601	0
2008-12-10 06:00:00	16	0	X				2008-12-10 06:00:00	175	24.4266	X
2008-12-10 06:15:00	17	-5.37948	X				2008-12-10 06:15:00	174	24.2528	X
2008-12-10 06:30:00	17	-5.37948	X				2008-12-10 06:30:00	174	24.2528	X
2008-12-10 06:45:00	17	-5.37948	X				2008-12-10 06:45:00	175	24.4266	X
2008-12-10 07:00:00	17	-5.37948	1				2008-12-10 07:00:00	172	23.9065	-3
2008-12-10 07:15:00	17	-5.37948	0				2008-12-10 07:15:00	176	24.601	2
2008-12-10 07:30:00	17	-5.37948	0				2008-12-10 07:30:00	176	24.601	2
2008-12-10 07:45:00	16	0	-1				2008-12-10 07:45:00	172	23.9065	-3
2008-12-10 08:00:00	17	-5.37948	0				2008-12-10 08:00:00	173	24.0794	1
2008-12-10 08:15:00	17	-5.37948	0				2008-12-10 08:15:00	173	24.0794	-3
2008-12-10 08:30:00	16	0	-1				2008-12-10 08:30:00	173	24.0794	-3
2008-12-10 08:45:00	16	0	0				2008-12-10 08:45:00	174	24.2528	2
2008-12-10 09:00:00	17	-5.37948	0				2008-12-10 09:00:00	174	24.2528	1
2008-12-10 09:15:00	18	-10.759	1				2008-12-10 09:15:00	176	24.601	3
2008-12-10 09:30:00	19	-16.1384	3				2008-12-10 09:30:00	176	24.601	3
2008-12-10 09:45:00	17	-5.37948	1				2008-12-10 09:45:00	176	24.601	2
2008-12-10 10:00:00	18	-10.759	1				2008-12-10 10:00:00	176	24.601	2
2008-12-10 10:15:00	16	0	-2				2008-12-10 10:15:00	177	24.7758	1
2008-12-10 10:30:00	17	-5.37948	-2				2008-12-10 10:30:00	177	24.7758	1
2008-12-10 10:45:00	17	-5.37948	0				2008-12-10 10:45:00	175	24.4266	-1
2008-12-10 11:00:00	18	-10.759	0				2008-12-10 11:00:00	176	24.601	0
2008-12-10 11:15:00	17	-5.37948	1				2008-12-10 11:15:00	176	24.601	-1
[truncated: 1,490 more rows]

## Sheet: WS2
Archival Data							Archival Data							Latitude and Longitude for Tag 88692
Date/Time	Press(val)	Depth(m)	Delta(val)	Δ Lim Dives	Δ Lim Ascents		Date/Time	Temp(val)	Temp(C)	Delta(val)	Δ Lim Inc Temp	Δ Lim Dec Temp		Date	Lat (N)	Long (W)		Lat (Avg)	Long (Avg)
2009-05-23 18:00:00	16	0	X				2009-05-23 18:00:00	207	30.2844	X				2009-05-23
2009-05-23 18:15:00	16	0	X				2009-05-23 18:15:00	207	30.2844	X				2009-05-24	24.0021	109.629		23.6371	109.355		Start Point
2009-05-23 18:30:00	16	0	X				2009-05-23 18:30:00	230	34.9241	X				2009-05-25	24.7241	109.856		22.4271	110.061		2009-05-23
2009-05-23 18:45:00	16	0	X				2009-05-23 18:45:00	218	32.4524	X				2009-05-26	22.1851	108.581		21.6185	110.154		Lat (N)	Long (W)
2009-05-23 19:00:00	16	0	0				2009-05-23 19:00:00	238	36.6391	31	36.6391			2009-05-27	18.797	112.18		19.408	110.178		24.155	110.281
2009-05-23 19:15:00	16	0	0				2009-05-23 19:15:00	192	27.4625	-15				2009-05-28	18.3844	110.526		18.2828	110.199
2009-05-23 19:30:00	16	0	0				2009-05-23 19:30:00	200	28.9493	-30				2009-05-29	12.9492	109.745		18.0702	110.693
2009-05-23 19:45:00	16	0	0				2009-05-23 19:45:00	200	28.9493	-18				2009-05-30	19.0985	109.962		18.5542	110.536		End Point
2009-05-23 20:00:00	16	0	0				2009-05-23 20:00:00	206	30.0916	-32		30.0916		2009-05-31	21.1218	111.053		18.6653	110.276		2009-07-06 23:45:11
2009-05-23 20:15:00	24	-43.0358	8				2009-05-23 20:15:00	160	21.8665	-32		21.8665		2009-06-01	21.217	111.392		20.1729	110.49		Lat (N)	Long (W)
2009-05-23 20:30:00	16	0	0				2009-05-23 20:30:00	177	24.7758	-23				2009-06-02	18.9398	109.229		19.6031	111.127		23.612	112.653
2009-05-23 20:45:00	16	0	0				2009-05-23 20:45:00	181	25.4803	-19				2009-06-03	20.4871	110.815		19.2429	111.263
2009-05-23 21:00:00	16	0	0				2009-05-23 21:00:00	177	24.7758	-29				2009-06-04	16.25	113.149		19.4381	111.247
2009-05-23 21:15:00	16	0	-8				2009-05-23 21:15:00	176	24.601	16				2009-06-05	19.3207	111.731		19.7063	111.705		Pop Reason
2009-05-23 21:30:00	16	0	0				2009-05-23 21:30:00	146	19.557	-31				2009-06-06	22.193	111.312		19.2747	111.636		Constant Pressure
2009-05-23 21:45:00	16	0	0				2009-05-23 21:45:00	182	25.6577	1				2009-06-07	20.2808	111.517		20.0459	111.241		Data %	0.99458
2009-05-23 22:00:00	16	0	0				2009-05-23 22:00:00	178	24.9512	1				2009-06-08	18.3289	110.471		20.1871	111.07
2009-05-23 22:15:00	34	-96.8306	18				2009-05-23 22:15:00	144	19.2323	-32		19.2323		2009-06-09	20.1062	111.173		19.6016	111.097
2009-05-23 22:30:00	16	0	0				2009-05-23 22:30:00	177	24.7758	31	24.7758			2009-06-10	20.0269	110.875		19.7476	110.974
2009-05-23 22:45:00	16	0	0				2009-05-23 22:45:00	157	21.3657	-25				2009-06-11	19.2651	111.45		18.3416	111.849
2009-05-23 23:00:00	16	0	0				2009-05-23 23:00:00	178	24.9512	0				2009-06-12	21.0107	110.899		17.9543	112.074
2009-05-23 23:15:00	39	-123.728	5				2009-05-23 23:15:00	119	15.2538	-25				2009-06-13	11.2988	114.848		17.7131	112.172
2009-05-23 23:30:00	16	0	0				2009-05-23 23:30:00	169	23.3906	-8				2009-06-14	18.1702	112.296		17.8877	112.195
2009-05-23 23:45:00	16	0	0				2009-05-23 23:45:00	166	22.8787	9				2009-06-15	18.8208	111.368		17.7957	112.418
2009-05-24	16	0	X				2009-05-24	173	24.0794	X				2009-06-16	20.1379	111.565		19.4619	111.889
2009-05-24 00:15:00	16	0	X				2009-05-24 00:15:00	172	23.9065	X				2009-06-17	20.5505	112.011		19.3365	111.836
2009-05-24 00:30:00	16	0	X				2009-05-24 00:30:00	182	25.6577	X				2009-06-18	19.6301	112.207		19.3096	111.982
2009-05-24 00:45:00	30	-75.3127	X				2009-05-24 00:45:00	132	17.3065	X				2009-06-19	17.5433	112.027		19.108	112.177
2009-05-24 01:00:00	16	0	0				2009-05-24 01:00:00	175	24.4266	2				2009-06-20	18.6859	112.098		18.4542	112.673
2009-05-24 01:15:00	28	-64.5538	12				2009-05-24 01:15:00	140	18.5863	-32		18.5863		2009-06-21	19.1302	112.543		18.4891	112.893
2009-05-24 01:30:00	16	0	0				2009-05-24 01:30:00	181	25.4803	-1				2009-06-22	17.2815	114.488		19.0763	113.213
2009-05-24 01:45:00	21	-26.8974	-9				2009-05-24 01:45:00	118	15.0969	-14				2009-06-23	19.8047	113.308		19.3492	113.409
2009-05-24 02:00:00	21	-26.8974	5				2009-05-24 02:00:00	171	23.7341	-4				2009-06-24	20.4791	113.629		19.6714	113.579
2009-05-24 02:15:00	17	-5.37948	-11				2009-05-24 02:15:00	171	23.7341	31	23.7341			2009-06-25	20.0507	113.075		20.2355	113.325
2009-05-24 02:30:00	16	0	0				2009-05-24 02:30:00	150	20.2101	-31				2009-06-26	20.741	113.396		20.4355	113.271
2009-05-24 02:45:00	16	0	-5				2009-05-24 02:45:00	149	20.0463	31	20.0463			2009-06-27	20.1022	113.217		20.3307	112.793
2009-05-24 03:00:00	23	-37.6564	2				2009-05-24 03:00:00	139	18.4255	-32		18.4255		2009-06-28	20.8044	113.039		20.4545	112.69
2009-05-24 03:15:00	22	-32.2769	5				2009-05-24 03:15:00	139	18.4255	-32		18.4255		2009-06-29	19.9554	111.237		20.5402	112.563
2009-05-24 03:30:00	24	-43.0358	8				2009-05-24 03:30:00	118	15.0969	-32		15.0969		2009-06-30	20.6696	112.56		20.4966	112.311
2009-05-24 03:45:00	22	-32.2769	6				2009-05-24 03:45:00	117	14.9402	-32		14.9402		2009-07-01	21.1694	112.759		20.4617	112.26
2009-05-24 04:00:00	16	0	-7				2009-05-24 04:00:00	170	23.5621	31	23.5621			2009-07-02	19.884	111.96		20.5204	112.51
2009-05-24 04:15:00	23	-37.6564	1				2009-05-24 04:15:00	154	20.8684	15				2009-07-03	20.6299	112.786		20.4521	112.337
2009-05-24 04:30:00	19	-16.1384	-5				2009-05-24 04:30:00	143	19.0704	25				2009-07-04	20.249	112.488		20.6156	112.189
2009-05-24 04:45:00	23	-37.6564	1				2009-05-24 04:45:00	148	19.8829	31	19.8829			2009-07-05	20.3284	111.691		20.7985	112.246
2009-05-24 05:00:00	28	-64.5538	12				2009-05-24 05:00:00	138	18.2649	-32		18.2649		2009-07-06	21.9867	112.02		20.8547	112.066
2009-05-24 05:15:00	16	0	-7				2009-05-24 05:15:00	132	17.3065	-22
2009-05-24 05:30:00	18	-10.759	-1				2009-05-24 05:30:00	123	15.8825	-20
2009-05-24 05:45:00	16	0	-7				2009-05-24 05:45:00	146	19.557	-2
2009-05-24 06:00:00	17	-5.37948	X				2009-05-24 06:00:00	142	18.9088	X
2009-05-24 06:15:00	23	-37.6564	X				2009-05-24 06:15:00	128	16.6718	X
2009-05-24 06:30:00	16	0	X				2009-05-24 06:30:00	171	23.7341	X
2009-05-24 06:45:00	16	0	X				2009-05-24 06:45:00	172	23.9065	X
2009-05-24 07:00:00	16	0	-1				2009-05-24 07:00:00	168	23.2195	26
2009-05-24 07:15:00	17	-5.37948	-6				2009-05-24 07:15:00	149	20.0463	21
2009-05-24 07:30:00	16	0	0				2009-05-24 07:30:00	175	24.4266	4
2009-05-24 07:45:00	16	0	0				2009-05-24 07:45:00	167	23.0489	-5
2009-05-24 08:00:00	24	-43.0358	8				2009-05-24 08:00:00	143	19.0704	-25
2009-05-24 08:15:00	22	-32.2769	5				2009-05-24 08:15:00	124	16.04	-25
2009-05-24 08:30:00	16	0	0				2009-05-24 08:30:00	172	23.9065	-3
2009-05-24 08:45:00	16	0	0				2009-05-24 08:45:00	160	21.8665	-7
2009-05-24 09:00:00	16	0	-8				2009-05-24 09:00:00	172	23.9065	29
2009-05-24 09:15:00	16	0	-6				2009-05-24 09:15:00	155	21.0338	31	21.0338
2009-05-24 09:30:00	16	0	0				2009-05-24 09:30:00	168	23.2195	-4
2009-05-24 09:45:00	16	0	0				2009-05-24 09:45:00	174	24.2528	14
2009-05-24 10:00:00	16	0	0				2009-05-24 10:00:00	174	24.2528	2
2009-05-24 10:15:00	16	0	0				2009-05-24 10:15:00	173	24.0794	18
2009-05-24 10:30:00	16	0	0				2009-05-24 10:30:00	172	23.9065	4
2009-05-24 10:45:00	16	0	0				2009-05-24 10:45:00	172	23.9065	-2
2009-05-24 11:00:00	16	0	0				2009-05-24 11:00:00	172	23.9065	-2
2009-05-24 11:15:00	16	0	0				2009-05-24 11:15:00	172	23.9065	-1
2009-05-24 11:30:00	16	0	0				2009-05-24 11:30:00	172	23.9065	0
2009-05-24 11:45:00	16	0	0				2009-05-24 11:45:00	172	23.9065	0
2009-05-24 12:00:00	16	0	X				2009-05-24 12:00:00	171	23.7341	X
2009-05-24 12:15:00	16	0	X				2009-05-24 12:15:00	171	23.7341	X
2009-05-24 12:30:00	16	0	X				2009-05-24 12:30:00	172	23.9065	X
2009-05-24 12:45:00	16	0	X				2009-05-24 12:45:00	171	23.7341	X
2009-05-24 13:00:00	16	0	0				2009-05-24 13:00:00	171	23.7341	0
2009-05-24 13:15:00	16	0	0				2009-05-24 13:15:00	171	23.7341	0
2009-05-24 13:30:00	16	0	0				2009-05-24 13:30:00	171	23.7341	-1
2009-05-24 13:45:00	16	0	0				2009-05-24 13:45:00	172	23.9065	1
2009-05-24 14:00:00	16	0	0				2009-05-24 14:00:00	172	23.9065	1
2009-05-24 14:15:00	16	0	0				2009-05-24 14:15:00	172	23.9065	1
2009-05-24 14:30:00	19	-16.1384	3				2009-05-24 14:30:00	146	19.557	-25
2009-05-24 14:45:00	16	0	0				2009-05-24 14:45:00	168	23.2195	-4
2009-05-24 15:00:00	16	0	0				2009-05-24 15:00:00	169	23.3906	-3
2009-05-24 15:15:00	16	0	0				2009-05-24 15:15:00	169	23.3906	-3
2009-05-24 15:30:00	16	0	-3				2009-05-24 15:30:00	170	23.5621	24
2009-05-24 15:45:00	16	0	0				2009-05-24 15:45:00	170	23.5621	2
2009-05-24 16:00:00	16	0	0				2009-05-24 16:00:00	170	23.5621	1
2009-05-24 16:15:00	16	0	0				2009-05-24 16:15:00	170	23.5621	1
2009-05-24 16:30:00	16	0	0				2009-05-24 16:30:00	172	23.9065	2
2009-05-24 16:45:00	16	0	0				2009-05-24 16:45:00	170	23.5621	0
2009-05-24 17:00:00	16	0	0				2009-05-24 17:00:00	166	22.8787	-4
2009-05-24 17:15:00	16	0	0				2009-05-24 17:15:00	171	23.7341	1
2009-05-24 17:30:00	16	0	0				2009-05-24 17:30:00	171	23.7341	-1
2009-05-24 17:45:00	16	0	0				2009-05-24 17:45:00	154	20.8684	-16
2009-05-24 18:00:00	16	0	X				2009-05-24 18:00:00	171	23.7341	X
2009-05-24 18:15:00	16	0	X				2009-05-24 18:15:00	171	23.7341	X
2009-05-24 18:30:00	16	0	X				2009-05-24 18:30:00	160	21.8665	X
2009-05-24 18:45:00	16	0	X				2009-05-24 18:45:00	164	22.5397	X
2009-05-24 19:00:00	16	0	0				2009-05-24 19:00:00	167	23.0489	-4
2009-05-24 19:15:00	16	0	0				2009-05-24 19:15:00	141	18.7474	-30
2009-05-24 19:30:00	16	0	0				2009-05-24 19:30:00	167	23.0489	7
2009-05-24 19:45:00	16	0	0				2009-05-24 19:45:00	166	22.8787	2
2009-05-24 20:00:00	16	0	0				2009-05-24 20:00:00	141	18.7474	-26
2009-05-24 20:15:00	16	0	0				2009-05-24 20:15:00	164	22.5397	23
2009-05-24 20:30:00	16	0	0				2009-05-24 20:30:00	165	22.709	-2
2009-05-24 20:45:00	16	0	0				2009-05-24 20:45:00	164	22.5397	-2
2009-05-24 21:00:00	16	0	0				2009-05-24 21:00:00	165	22.709	24
2009-05-24 21:15:00	16	0	0				2009-05-24 21:15:00	132	17.3065	-32		17.3065
2009-05-24 21:30:00	16	0	0				2009-05-24 21:30:00	168	23.2195	3
2009-05-24 21:45:00	16	0	0				2009-05-24 21:45:00	172	23.9065	8
2009-05-24 22:00:00	16	0	0				2009-05-24 22:00:00	173	24.0794	8
2009-05-24 22:15:00	17	-5.37948	1				2009-05-24 22:15:00	163	22.3708	31	22.3708
2009-05-24 22:30:00	18	-10.759	2				2009-05-24 22:30:00	136	17.9445	-32		17.9445
2009-05-24 22:45:00	16	0	0				2009-05-24 22:45:00	159	21.6992	-13
2009-05-24 23:00:00	16	0	0				2009-05-24 23:00:00	158	21.5323	-15
2009-05-24 23:15:00	16	0	-1				2009-05-24 23:15:00	156	21.1996	-7
2009-05-24 23:30:00	16	0	-2				2009-05-24 23:30:00	157	21.3657	21
2009-05-24 23:45:00	19	-16.1384	3				2009-05-24 23:45:00	151	20.3741	-8
2009-05-25	16	0	X				2009-05-25	159	21.6992	X
2009-05-25 00:15:00	16	0	X				2009-05-25 00:15:00	141	18.7474	X
2009-05-25 00:30:00	16	0	X				2009-05-25 00:30:00	157	21.3657	X
2009-05-25 00:45:00	16	0	X				2009-05-25 00:45:00	156	21.1996	X
2009-05-25 01:00:00	16	0	0				2009-05-25 01:00:00	159	21.6992	0
2009-05-25 01:15:00	16	0	0				2009-05-25 01:15:00	168	23.2195	27
2009-05-25 01:30:00	16	0	0				2009-05-25 01:30:00	172	23.9065	15
2009-05-25 01:45:00	16	0	0				2009-05-25 01:45:00	173	24.0794	17
2009-05-25 02:00:00	16	0	0				2009-05-25 02:00:00	167	23.0489	8
2009-05-25 02:15:00	20	-21.5179	4				2009-05-25 02:15:00	164	22.5397	-4
2009-05-25 02:30:00	18	-10.759	2				2009-05-25 02:30:00	154	20.8684	-18
2009-05-25 02:45:00	16	0	0				2009-05-25 02:45:00	171	23.7341	-2
2009-05-25 03:00:00	16	0	0				2009-05-25 03:00:00	170	23.5621	3
2009-05-25 03:15:00	16	0	-4				2009-05-25 03:15:00	170	23.5621	6
2009-05-25 03:30:00	16	0	-2				2009-05-25 03:30:00	169	23.3906	15
2009-05-25 03:45:00	16	0	0				2009-05-25 03:45:00	157	21.3657	-14
2009-05-25 04:00:00	16	0	0				2009-05-25 04:00:00	165	22.709	-5
2009-05-25 04:15:00	16	0	0				2009-05-25 04:15:00	159	21.6992	-11
2009-05-25 04:30:00	16	0	0				2009-05-25 04:30:00	165	22.709	-4
2009-05-25 04:45:00	16	0	0				2009-05-25 04:45:00	156	21.1996	-1
2009-05-25 05:00:00	16	0	0				2009-05-25 05:00:00	153	20.7033	-12
2009-05-25 05:15:00	16	0	0				2009-05-25 05:15:00	150	20.2101	-9
2009-05-25 05:30:00	16	0	0				2009-05-25 05:30:00	157	21.3657	-8
2009-05-25 05:45:00	16	0	0				2009-05-25 05:45:00	165	22.709	9
2009-05-25 06:00:00	16	0	X				2009-05-25 06:00:00	160	21.8665	X
2009-05-25 06:15:00	16	0	X				2009-05-25 06:15:00	159	21.6992	X
2009-05-25 06:30:00	16	0	X				2009-05-25 06:30:00	163	22.3708	X
2009-05-25 06:45:00	16	0	X				2009-05-25 06:45:00	166	22.8787	X
2009-05-25 07:00:00	16	0	0				2009-05-25 07:00:00	162	22.2023	2
2009-05-25 07:15:00	16	0	0				2009-05-25 07:15:00	158	21.5323	-1
2009-05-25 07:30:00	16	0	0				2009-05-25 07:30:00	158	21.5323	-5
2009-05-25 07:45:00	16	0	0				2009-05-25 07:45:00	154	20.8684	-12
2009-05-25 08:00:00	16	0	0				2009-05-25 08:00:00	153	20.7033	-9
2009-05-25 08:15:00	16	0	0				2009-05-25 08:15:00	155	21.0338	-3
2009-05-25 08:30:00	16	0	0				2009-05-25 08:30:00	153	20.7033	-5
2009-05-25 08:45:00	16	0	0				2009-05-25 08:45:00	153	20.7033	-1
2009-05-25 09:00:00	16	0	0				2009-05-25 09:00:00	154	20.8684	1
2009-05-25 09:15:00	16	0	0				2009-05-25 09:15:00	156	21.1996	1
2009-05-25 09:30:00	16	0	0				2009-05-25 09:30:00	150	20.2101	-3
2009-05-25 09:45:00	16	0	0				2009-05-25 09:45:00	152	20.5385	-1
2009-05-25 10:00:00	16	0	0				2009-05-25 10:00:00	151	20.3741	-3
2009-05-25 10:15:00	16	0	0				2009-05-25 10:15:00	156	21.1996	0
2009-05-25 10:30:00	16	0	0				2009-05-25 10:30:00	158	21.5323	8
2009-05-25 10:45:00	16	0	0				2009-05-25 10:45:00	158	21.5323	6
2009-05-25 11:00:00	16	0	0				2009-05-25 11:00:00	159	21.6992	8
2009-05-25 11:15:00	16	0	0				2009-05-25 11:15:00	161	22.0342	5
2009-05-25 11:30:00	17	-5.37948	1				2009-05-25 11:30:00	163	22.3708	5
2009-05-25 11:45:00	16	0	0				2009-05-25 11:45:00	168	23.2195	10
2009-05-25 12:00:00	16	0	X				2009-05-25 12:00:00	169	23.3906	X
2009-05-25 12:15:00	16	0	X				2009-05-25 12:15:00	169	23.3906	X
2009-05-25 12:30:00	16	0	X				2009-05-25 12:30:00	169	23.3906	X
2009-05-25 12:45:00	16	0	X				2009-05-25 12:45:00	169	23.3906	X
2009-05-25 13:00:00	16	0	0				2009-05-25 13:00:00	168	23.2195	-1
2009-05-25 13:15:00	16	0	0				2009-05-25 13:15:00	169	23.3906	0
2009-05-25 13:30:00	16	0	0				2009-05-25 13:30:00	169	23.3906	0
2009-05-25 13:45:00	16	0	0				2009-05-25 13:45:00	169	23.3906	0
2009-05-25 14:00:00	16	0	0				2009-05-25 14:00:00	167	23.0489	-1
2009-05-25 14:15:00	16	0	0				2009-05-25 14:15:00	170	23.5621	1
2009-05-25 14:30:00	16	0	0				2009-05-25 14:30:00	170	23.5621	1
2009-05-25 14:45:00	16	0	0				2009-05-25 14:45:00	169	23.3906	0
2009-05-25 15:00:00	16	0	0				2009-05-25 15:00:00	168	23.2195	1
2009-05-25 15:15:00	16	0	0				2009-05-25 15:15:00	167	23.0489	-3
2009-05-25 15:30:00	16	0	0				2009-05-25 15:30:00	167	23.0489	-3
2009-05-25 15:45:00	16	0	0				2009-05-25 15:45:00	168	23.2195	-1
2009-05-25 16:00:00	16	0	0				2009-05-25 16:00:00	169	23.3906	1
2009-05-25 16:15:00	16	0	0				2009-05-25 16:15:00	169	23.3906	2
2009-05-25 16:30:00	16	0	0				2009-05-25 16:30:00	172	23.9065	5
2009-05-25 16:45:00	16	0	0				2009-05-25 16:45:00	173	24.0794	5
2009-05-25 17:00:00	16	0	0				2009-05-25 17:00:00	174	24.2528	5
2009-05-25 17:15:00	16	0	0				2009-05-25 17:15:00	174	24.2528	5
2009-05-25 17:30:00	16	0	0				2009-05-25 17:30:00	174	24.2528	2
2009-05-25 17:45:00	16	0	0				2009-05-25 17:45:00	175	24.4266	2
2009-05-25 18:00:00	16	0	X				2009-05-25 18:00:00	176	24.601	X
2009-05-25 18:15:00	16	0	X				2009-05-25 18:15:00	176	24.601	X
2009-05-25 18:30:00	16	0	X				2009-05-25 18:30:00	176	24.601	X
2009-05-25 18:45:00	16	0	X				2009-05-25 18:45:00	175	24.4266	X
2009-05-25 19:00:00	16	0	0				2009-05-25 19:00:00	176	24.601	0
2009-05-25 19:15:00	16	0	0				2009-05-25 19:15:00	177	24.7758	1
2009-05-25 19:30:00	16	0	0				2009-05-25 19:30:00	176	24.601	0
2009-05-25 19:45:00	16	0	0				2009-05-25 19:45:00	178	24.9512	3
2009-05-25 20:00:00	16	0	0				2009-05-25 20:00:00	179	25.127	3
2009-05-25 20:15:00	16	0	0				2009-05-25 20:15:00	178	24.9512	1
2009-05-25 20:30:00	16	0	0				2009-05-25 20:30:00	177	24.7758	1
2009-05-25 20:45:00	16	0	0				2009-05-25 20:45:00	178	24.9512	0
2009-05-25 21:00:00	16	0	0				2009-05-25 21:00:00	178	24.9512	-1
2009-05-25 21:15:00	16	0	0				2009-05-25 21:15:00	176	24.601	-2
2009-05-25 21:30:00	16	0	0				2009-05-25 21:30:00	176	24.601	-1
2009-05-25 21:45:00	16	0	0				2009-05-25 21:45:00	175	24.4266	-3
2009-05-25 22:00:00	16	0	0				2009-05-25 22:00:00	175	24.4266	-3
2009-05-25 22:15:00	16	0	0				2009-05-25 22:15:00	177	24.7758	1
2009-05-25 22:30:00	16	0	0				2009-05-25 22:30:00	178	24.9512	2
2009-05-25 22:45:00	16	0	0				2009-05-25 22:45:00	175	24.4266	0
2009-05-25 23:00:00	16	0	0				2009-05-25 23:00:00	175	24.4266	0
2009-05-25 23:15:00	16	0	0				2009-05-25 23:15:00	175	24.4266	-2
2009-05-25 23:30:00	16	0	0				2009-05-25 23:30:00	175	24.4266	-3
2009-05-25 23:45:00	16	0	0				2009-05-25 23:45:00	174	24.2528	-1
2009-05-26	16	0	X				2009-05-26	172	23.9065	X
2009-05-26 00:15:00	16	0	X				2009-05-26 00:15:00	173	24.0794	X
2009-05-26 00:30:00	16	0	X				2009-05-26 00:30:00	172	23.9065	X
2009-05-26 00:45:00	22	-32.2769	X				2009-05-26 00:45:00	139	18.4255	X
2009-05-26 01:00:00	16	0	0				2009-05-26 01:00:00	140	18.5863	-32		18.5863
2009-05-26 01:15:00	16	0	0				2009-05-26 01:15:00	152	20.5385	-21
2009-05-26 01:30:00	16	0	0				2009-05-26 01:30:00	156	21.1996	-16
2009-05-26 01:45:00	16	0	-6				2009-05-26 01:45:00	153	20.7033	14
2009-05-26 02:00:00	17	-5.37948	1				2009-05-26 02:00:00	152	20.5385	12
2009-05-26 02:15:00	18	-10.759	2				2009-05-26 02:15:00	155	21.0338	3
2009-05-26 02:30:00	18	-10.759	2				2009-05-26 02:30:00	150	20.2101	-6
2009-05-26 02:45:00	16	0	0				2009-05-26 02:45:00	153	20.7033	0
2009-05-26 03:00:00	16	0	-1				2009-05-26 03:00:00	158	21.5323	6
2009-05-26 03:15:00	16	0	-2				2009-05-26 03:15:00	171	23.7341	16
2009-05-26 03:30:00	16	0	-2				2009-05-26 03:30:00	166	22.8787	16
2009-05-26 03:45:00	16	0	0				2009-05-26 03:45:00	169	23.3906	16
2009-05-26 04:00:00	16	0	0				2009-05-26 04:00:00	169	23.3906	11
2009-05-26 04:15:00	16	0	0				2009-05-26 04:15:00	168	23.2195	-3
2009-05-26 04:30:00	17	-5.37948	1				2009-05-26 04:30:00	168	23.2195	2
2009-05-26 04:45:00	16	0	0				2009-05-26 04:45:00	168	23.2195	-1
2009-05-26 05:00:00	16	0	0				2009-05-26 05:00:00	164	22.5397	-5
2009-05-26 05:15:00	16	0	0				2009-05-26 05:15:00	161	22.0342	-7
2009-05-26 05:30:00	17	-5.37948	0				2009-05-26 05:30:00	150	20.2101	-18
2009-05-26 05:45:00	17	-5.37948	1				2009-05-26 05:45:00	147	19.7198	-21
2009-05-26 06:00:00	16	0	X				2009-05-26 06:00:00	153	20.7033	X
2009-05-26 06:15:00	19	-16.1384	X				2009-05-26 06:15:00	130	16.9887	X
2009-05-26 06:30:00	16	0	X				2009-05-26 06:30:00	156	21.1996	X
2009-05-26 06:45:00	21	-26.8974	X				2009-05-26 06:45:00	122	15.7251	X
2009-05-26 07:00:00	18	-10.759	2				2009-05-26 07:00:00	126	16.3555	-27
2009-05-26 07:15:00	20	-21.5179	1				2009-05-26 07:15:00	120	15.4107	-10
2009-05-26 07:30:00	16	0	0				2009-05-26 07:30:00	156	21.1996	0
2009-05-26 07:45:00	16	0	-5				2009-05-26 07:45:00	153	20.7033	31	20.7033
2009-05-26 08:00:00	16	0	-2				2009-05-26 08:00:00	157	21.3657	31	21.3657
2009-05-26 08:15:00	18	-10.759	-2				2009-05-26 08:15:00	142	18.9088	22
2009-05-26 08:30:00	18	-10.759	2				2009-05-26 08:30:00	140	18.5863	-16
2009-05-26 08:45:00	19	-16.1384	3				2009-05-26 08:45:00	136	17.9445	-17
2009-05-26 09:00:00	16	0	0				2009-05-26 09:00:00	171	23.7341	14
2009-05-26 09:15:00	16	0	-2				2009-05-26 09:15:00	173	24.0794	31	24.0794
2009-05-26 09:30:00	18	-10.759	0				2009-05-26 09:30:00	171	23.7341	31	23.7341
2009-05-26 09:45:00	17	-5.37948	-2				2009-05-26 09:45:00	167	23.0489	31	23.0489
2009-05-26 10:00:00	18	-10.759	2				2009-05-26 10:00:00	158	21.5323	-13
2009-05-26 10:15:00	18	-10.759	2				2009-05-26 10:15:00	181	25.4803	8
2009-05-26 10:30:00	17	-5.37948	-1				2009-05-26 10:30:00	183	25.8357	12
2009-05-26 10:45:00	17	-5.37948	0				2009-05-26 10:45:00	182	25.6577	15
2009-05-26 11:00:00	16	0	-2				2009-05-26 11:00:00	184	26.0142	26
2009-05-26 11:15:00	17	-5.37948	-1				2009-05-26 11:15:00	181	25.4803	0
2009-05-26 11:30:00	19	-16.1384	2				2009-05-26 11:30:00	174	24.2528	-9
2009-05-26 11:45:00	16	0	-1				2009-05-26 11:45:00	181	25.4803	-1
2009-05-26 12:00:00	16	0	X				2009-05-26 12:00:00	179	25.127	X
2009-05-26 12:15:00	16	0	X				2009-05-26 12:15:00	172	23.9065	X
2009-05-26 12:30:00	16	0	X				2009-05-26 12:30:00	169	23.3906	X
2009-05-26 12:45:00	16	0	X				2009-05-26 12:45:00	164	22.5397	X
2009-05-26 13:00:00	16	0	0				2009-05-26 13:00:00	165	22.709	-14
2009-05-26 13:15:00	16	0	0				2009-05-26 13:15:00	166	22.8787	-6
2009-05-26 13:30:00	16	0	0				2009-05-26 13:30:00	167	23.0489	-2
2009-05-26 13:45:00	18	-10.759	2				2009-05-26 13:45:00	168	23.2195	4
2009-05-26 14:00:00	16	0	0				2009-05-26 14:00:00	170	23.5621	5
2009-05-26 14:15:00	16	0	0				2009-05-26 14:15:00	168	23.2195	2
2009-05-26 14:30:00	16	0	0				2009-05-26 14:30:00	171	23.7341	4
2009-05-26 14:45:00	18	-10.759	0				2009-05-26 14:45:00	170	23.5621	2
2009-05-26 15:00:00	16	0	0				2009-05-26 15:00:00	169	23.3906	-1
2009-05-26 15:15:00	16	0	0				2009-05-26 15:15:00	169	23.3906	1
2009-05-26 15:30:00	16	0	0				2009-05-26 15:30:00	172	23.9065	1
2009-05-26 15:45:00	17	-5.37948	-1				2009-05-26 15:45:00	172	23.9065	2
2009-05-26 16:00:00	16	0	0				2009-05-26 16:00:00	172	23.9065	3
2009-05-26 16:15:00	16	0	0				2009-05-26 16:15:00	173	24.0794	4
2009-05-26 16:30:00	17	-5.37948	1				2009-05-26 16:30:00	173	24.0794	1
2009-05-26 16:45:00	18	-10.759	1				2009-05-26 16:45:00	168	23.2195	-4
2009-05-26 17:00:00	17	-5.37948	1				2009-05-26 17:00:00	170	23.5621	-2
2009-05-26 17:15:00	16	0	0				2009-05-26 17:15:00	173	24.0794	0
2009-05-26 17:30:00	16	0	-1				2009-05-26 17:30:00	173	24.0794	0
2009-05-26 17:45:00	18	-10.759	0				2009-05-26 17:45:00	171	23.7341	3
2009-05-26 18:00:00	16	0	X				2009-05-26 18:00:00	171	23.7341	X
2009-05-26 18:15:00	16	0	X				2009-05-26 18:15:00	174	24.2528	X
2009-05-26 18:30:00	16	0	X				2009-05-26 18:30:00	174	24.2528	X
2009-05-26 18:45:00	16	0	X				2009-05-26 18:45:00	172	23.9065	X
2009-05-26 19:00:00	16	0	0				2009-05-26 19:00:00	171	23.7341	0
2009-05-26 19:15:00	16	0	0				2009-05-26 19:15:00	171	23.7341	-3
2009-05-26 19:30:00	16	0	0				2009-05-26 19:30:00	170	23.5621	-4
2009-05-26 19:45:00	16	0	0				2009-05-26 19:45:00	154	20.8684	-18
2009-05-26 20:00:00	16	0	0				2009-05-26 20:00:00	172	23.9065	1
2009-05-26 20:15:00	16	0	0				2009-05-26 20:15:00	170	23.5621	-1
2009-05-26 20:30:00	25	-48.4153	9				2009-05-26 20:30:00	138	18.2649	-32		18.2649
2009-05-26 20:45:00	16	0	0				2009-05-26 20:45:00	169	23.3906	15
2009-05-26 21:00:00	16	0	0				2009-05-26 21:00:00	170	23.5621	-2
2009-05-26 21:15:00	16	0	0				2009-05-26 21:15:00	172	23.9065	2
2009-05-26 21:30:00	16	0	-9				2009-05-26 21:30:00	169	23.3906	31	23.3906
2009-05-26 21:45:00	16	0	0				2009-05-26 21:45:00	172	23.9065	3
2009-05-26 22:00:00	16	0	0				2009-05-26 22:00:00	174	24.2528	4
2009-05-26 22:15:00	16	0	0				2009-05-26 22:15:00	173	24.0794	1
2009-05-26 22:30:00	29	-69.9332	13				2009-05-26 22:30:00	137	18.1046	-32		18.1046
2009-05-26 22:45:00	16	0	0				2009-05-26 22:45:00	171	23.7341	-1
2009-05-26 23:00:00	18	-10.759	2				2009-05-26 23:00:00	167	23.0489	-7
2009-05-26 23:15:00	20	-21.5179	4				2009-05-26 23:15:00	158	21.5323	-15
2009-05-26 23:30:00	23	-37.6564	-6				2009-05-26 23:30:00	148	19.8829	11
2009-05-26 23:45:00	16	0	0				2009-05-26 23:45:00	170	23.5621	-1
2009-05-27	16	0	X				2009-05-27	174	24.2528	X
2009-05-27 00:15:00	16	0	X				2009-05-27 00:15:00	174	24.2528	X
2009-05-27 00:30:00	16	0	X				2009-05-27 00:30:00	172	23.9065	X
2009-05-27 00:45:00	16	0	X				2009-05-27 00:45:00	169	23.3906	X
2009-05-27 01:00:00	16	0	0				2009-05-27 01:00:00	166	22.8787	-8
2009-05-27 01:15:00	16	0	0				2009-05-27 01:15:00	157	21.3657	-17
2009-05-27 01:30:00	16	0	0				2009-05-27 01:30:00	169	23.3906	-3
2009-05-27 01:45:00	16	0	0				2009-05-27 01:45:00	162	22.2023	-7
2009-05-27 02:00:00	16	0	0				2009-05-27 02:00:00	170	23.5621	4
2009-05-27 02:15:00	16	0	0				2009-05-27 02:15:00	156	21.1996	-1
2009-05-27 02:30:00	16	0	0				2009-05-27 02:30:00	167	23.0489	-2
2009-05-27 02:45:00	16	0	0				2009-05-27 02:45:00	158	21.5323	-4
2009-05-27 03:00:00	16	0	0				2009-05-27 03:00:00	170	23.5621	0
2009-05-27 03:15:00	17	-5.37948	1				2009-05-27 03:15:00	167	23.0489	11
2009-05-27 03:30:00	16	0	0				2009-05-27 03:30:00	173	24.0794	6
2009-05-27 03:45:00	16	0	0				2009-05-27 03:45:00	170	23.5621	12
2009-05-27 04:00:00	16	0	0				2009-05-27 04:00:00	166	22.8787	-4
2009-05-27 04:15:00	17	-5.37948	0				2009-05-27 04:15:00	163	22.3708	-4
2009-05-27 04:30:00	16	0	0				2009-05-27 04:30:00	163	22.3708	-10
2009-05-27 04:45:00	17	-5.37948	1				2009-05-27 04:45:00	147	19.7198	-23
2009-05-27 05:00:00	16	0	0				2009-05-27 05:00:00	167	23.0489	1
2009-05-27 05:15:00	16	0	-1				2009-05-27 05:15:00	163	22.3708	0
2009-05-27 05:30:00	16	0	0				2009-05-27 05:30:00	155	21.0338	-8
2009-05-27 05:45:00	16	0	-1				2009-05-27 05:45:00	166	22.8787	19
2009-05-27 06:00:00	16	0	X				2009-05-27 06:00:00	172	23.9065	X
2009-05-27 06:15:00	16	0	X				2009-05-27 06:15:00	172	23.9065	X
2009-05-27 06:30:00	16	0	X				2009-05-27 06:30:00	172	23.9065	X
2009-05-27 06:45:00	16	0	X				2009-05-27 06:45:00	171	23.7341	X
2009-05-27 07:00:00	16	0	0				2009-05-27 07:00:00	176	24.601	4
2009-05-27 07:15:00	16	0	0				2009-05-27 07:15:00	176	24.601	4
2009-05-27 07:30:00	16	0	0				2009-05-27 07:30:00	176	24.601	4
2009-05-27 07:45:00	16	0	0				2009-05-27 07:45:00	175	24.4266	4
2009-05-27 08:00:00	16	0	0				2009-05-27 08:00:00	174	24.2528	-2
2009-05-27 08:15:00	16	0	0				2009-05-27 08:15:00	176	24.601	0
2009-05-27 08:30:00	16	0	0				2009-05-27 08:30:00	174	24.2528	-2
2009-05-27 08:45:00	16	0	0				2009-05-27 08:45:00	173	24.0794	-2
2009-05-27 09:00:00	16	0	0				2009-05-27 09:00:00	172	23.9065	-2
2009-05-27 09:15:00	17	-5.37948	1				2009-05-27 09:15:00	172	23.9065	-4
2009-05-27 09:30:00	16	0	0				2009-05-27 09:30:00	172	23.9065	-2
2009-05-27 09:45:00	16	0	0				2009-05-27 09:45:00	172	23.9065	-1
2009-05-27 10:00:00	16	0	0				2009-05-27 10:00:00	172	23.9065	0
2009-05-27 10:15:00	16	0	-1				2009-05-27 10:15:00	166	22.8787	-6
2009-05-27 10:30:00	16	0	0				2009-05-27 10:30:00	169	23.3906	-3
2009-05-27 10:45:00	17	-5.37948	1				2009-05-27 10:45:00	167	23.0489	-5
2009-05-27 11:00:00	23	-37.6564	7				2009-05-27 11:00:00	140	18.5863	-32		18.5863
2009-05-27 11:15:00	16	0	0				2009-05-27 11:15:00	168	23.2195	2
2009-05-27 11:30:00	16	0	0				2009-05-27 11:30:00	169	23.3906	0
2009-05-27 11:45:00	16	0	-1				2009-05-27 11:45:00	168	23.2195	1
2009-05-27 12:00:00	16	0	X				2009-05-27 12:00:00	169	23.3906	X
2009-05-27 12:15:00	16	0	X				2009-05-27 12:15:00	167	23.0489	X
2009-05-27 12:30:00	16	0	X				2009-05-27 12:30:00	161	22.0342	X
2009-05-27 12:45:00	18	-10.759	X				2009-05-27 12:45:00	165	22.709	X
2009-05-27 13:00:00	17	-5.37948	1				2009-05-27 13:00:00	167	23.0489	-2
2009-05-27 13:15:00	17	-5.37948	1				2009-05-27 13:15:00	165	22.709	-2
2009-05-27 13:30:00	16	0	0				2009-05-27 13:30:00	167	23.0489	6
2009-05-27 13:45:00	16	0	-2				2009-05-27 13:45:00	169	23.3906	4
2009-05-27 14:00:00	16	0	-1				2009-05-27 14:00:00	168	23.2195	1
2009-05-27 14:15:00	17	-5.37948	0				2009-05-27 14:15:00	164	22.5397	-1
2009-05-27 14:30:00	19	-16.1384	3				2009-05-27 14:30:00	159	21.6992	-8
2009-05-27 14:45:00	20	-21.5179	4				2009-05-27 14:45:00	148	19.8829	-21
2009-05-27 15:00:00	20	-21.5179	4				2009-05-27 15:00:00	167	23.0489	-1
2009-05-27 15:15:00	19	-16.1384	2				2009-05-27 15:15:00	165	22.709	1
2009-05-27 15:30:00	18	-10.759	-1				2009-05-27 15:30:00	175	24.4266	16
2009-05-27 15:45:00	16	0	-4				2009-05-27 15:45:00	179	25.127	31	25.127
2009-05-27 16:00:00	16	0	-4				2009-05-27 16:00:00	184	26.0142	17
2009-05-27 16:15:00	16	0	-3				2009-05-27 16:15:00	184	26.0142	19
2009-05-27 16:30:00	16	0	-2				2009-05-27 16:30:00	185	26.1933	10
2009-05-27 16:45:00	19	-16.1384	3				2009-05-27 16:45:00	174	24.2528	-5
2009-05-27 17:00:00	19	-16.1384	3				2009-05-27 17:00:00	170	23.5621	-14
2009-05-27 17:15:00	16	0	0				2009-05-27 17:15:00	185	26.1933	1
2009-05-27 17:30:00	16	0	0				2009-05-27 17:30:00	186	26.3729	1
2009-05-27 17:45:00	16	0	-3				2009-05-27 17:45:00	186	26.3729	12
2009-05-27 18:00:00	23	-37.6564	X				2009-05-27 18:00:00	175	24.4266	X
2009-05-27 18:15:00	18	-10.759	X				2009-05-27 18:15:00	171	23.7341	X
2009-05-27 18:30:00	19	-16.1384	X				2009-05-27 18:30:00	172	23.9065	X
2009-05-27 18:45:00	19	-16.1384	X				2009-05-27 18:45:00	172	23.9065	X
2009-05-27 19:00:00	19	-16.1384	-4				2009-05-27 19:00:00	173	24.0794	-2
2009-05-27 19:15:00	18	-10.759	0				2009-05-27 19:15:00	171	23.7341	0
2009-05-27 19:30:00	19	-16.1384	0				2009-05-27 19:30:00	175	24.4266	3
2009-05-27 19:45:00	16	0	-3				2009-05-27 19:45:00	186	26.3729	14
2009-05-27 20:00:00	16	0	-3				2009-05-27 20:00:00	187	26.553	14
2009-05-27 20:15:00	20	-21.5179	2				2009-05-27 20:15:00	163	22.3708	-8
2009-05-27 20:30:00	20	-21.5179	1				2009-05-27 20:30:00	159	21.6992	-16
2009-05-27 20:45:00	20	-21.5179	4				2009-05-27 20:45:00	159	21.6992	-27
2009-05-27 21:00:00	21	-26.8974	5				2009-05-27 21:00:00	159	21.6992	-28
2009-05-27 21:15:00	21	-26.8974	1				2009-05-27 21:15:00	158	21.5323	-5
2009-05-27 21:30:00	21	-26.8974	1				2009-05-27 21:30:00	159	21.6992	0
2009-05-27 21:45:00	22	-32.2769	2				2009-05-27 21:45:00	138	18.2649	-21
2009-05-27 22:00:00	22	-32.2769	1				2009-05-27 22:00:00	161	22.0342	2
2009-05-27 22:15:00	21	-26.8974	0				2009-05-27 22:15:00	161	22.0342	3
2009-05-27 22:30:00	21	-26.8974	0				2009-05-27 22:30:00	161	22.0342	2
2009-05-27 22:45:00	21	-26.8974	-1				2009-05-27 22:45:00	160	21.8665	22
2009-05-27 23:00:00	21	-26.8974	-1				2009-05-27 23:00:00	160	21.8665	-1
2009-05-27 23:15:00	20	-21.5179	-1				2009-05-27 23:15:00	161	22.0342	0
2009-05-27 23:30:00	21	-26.8974	0				2009-05-27 23:30:00	156	21.1996	-5
2009-05-27 23:45:00	21	-26.8974	0				2009-05-27 23:45:00	157	21.3657	-3
2009-05-28	21	-26.8974	X				2009-05-28	153	20.7033	X
2009-05-28 00:15:00	16	0	X				2009-05-28 00:15:00	186	26.3729	X
2009-05-28 00:30:00	16	0	X				2009-05-28 00:30:00	187	26.553	X
2009-05-28 00:45:00	16	0	X				2009-05-28 00:45:00	186	26.3729	X
2009-05-28 01:00:00	22	-32.2769	1				2009-05-28 01:00:00	147	19.7198	-6
2009-05-28 01:15:00	22	-32.2769	6				2009-05-28 01:15:00	154	20.8684	-32		20.8684
2009-05-28 01:30:00	20	-21.5179	4				2009-05-28 01:30:00	155	21.0338	-32		21.0338
2009-05-28 01:45:00	20	-21.5179	4				2009-05-28 01:45:00	164	22.5397	-22
2009-05-28 02:00:00	20	-21.5179	-2				2009-05-28 02:00:00	167	23.0489	20
2009-05-28 02:15:00	20	-21.5179	-2				2009-05-28 02:15:00	166	22.8787	12
2009-05-28 02:30:00	21	-26.8974	1				2009-05-28 02:30:00	165	22.709	10
2009-05-28 02:45:00	21	-26.8974	1				2009-05-28 02:45:00	165	22.709	1
2009-05-28 03:00:00	21	-26.8974	1				2009-05-28 03:00:00	164	22.5397	-3
2009-05-28 03:15:00	21	-26.8974	1				2009-05-28 03:15:00	164	22.5397	-2
2009-05-28 03:30:00	22	-32.2769	1				2009-05-28 03:30:00	164	22.5397	-1
2009-05-28 03:45:00	16	0	-5				2009-05-28 03:45:00	183	25.8357	18
2009-05-28 04:00:00	21	-26.8974	0				2009-05-28 04:00:00	167	23.0489	3
2009-05-28 04:15:00	22	-32.2769	1				2009-05-28 04:15:00	161	22.0342	-3
2009-05-28 04:30:00	22	-32.2769	0				2009-05-28 04:30:00	160	21.8665	-4
2009-05-28 04:45:00	21	-26.8974	5				2009-05-28 04:45:00	164	22.5397	-19
2009-05-28 05:00:00	16	0	-5				2009-05-28 05:00:00	186	26.3729	19
2009-05-28 05:15:00	19	-16.1384	-3				2009-05-28 05:15:00	185	26.1933	24
2009-05-28 05:30:00	16	0	-6				2009-05-28 05:30:00	188	26.7338	28
2009-05-28 05:45:00	20	-21.5179	-1				2009-05-28 05:45:00	183	25.8357	19
2009-05-28 06:00:00	21	-26.8974	X				2009-05-28 06:00:00	180	25.3034	X
2009-05-28 06:15:00	17	-5.37948	X				2009-05-28 06:15:00	169	23.3906	X
2009-05-28 06:30:00	18	-10.759	X				2009-05-28 06:30:00	186	26.3729	X
2009-05-28 06:45:00	21	-26.8974	X				2009-05-28 06:45:00	163	22.3708	X
2009-05-28 07:00:00	20	-21.5179	-1				2009-05-28 07:00:00	163	22.3708	-17
2009-05-28 07:15:00	20	-21.5179	3				2009-05-28 07:15:00	165	22.709	-4
2009-05-28 07:30:00	20	-21.5179	2				2009-05-28 07:30:00	165	22.709	-21
2009-05-28 07:45:00	17	-5.37948	-4				2009-05-28 07:45:00	187	26.553	24
2009-05-28 08:00:00	17	-5.37948	-3				2009-05-28 08:00:00	187	26.553	24
2009-05-28 08:15:00	17	-5.37948	-3				2009-05-28 08:15:00	188	26.7338	23
2009-05-28 08:30:00	18	-10.759	-2				2009-05-28 08:30:00	187	26.553	22
2009-05-28 08:45:00	19	-16.1384	2				2009-05-28 08:45:00	185	26.1933	-2
2009-05-28 09:00:00	19	-16.1384	2				2009-05-28 09:00:00	185	26.1933	-2
2009-05-28 09:15:00	19	-16.1384	2				2009-05-28 09:15:00	185	26.1933	-3
2009-05-28 09:30:00	19	-16.1384	1				2009-05-28 09:30:00	184	26.0142	-3
2009-05-28 09:45:00	19	-16.1384	0				2009-05-28 09:45:00	185	26.1933	0
2009-05-28 10:00:00	19	-16.1384	0				2009-05-28 10:00:00	186	26.3729	1
2009-05-28 10:15:00	19	-16.1384	0				2009-05-28 10:15:00	187	26.553	2
2009-05-28 10:30:00	18	-10.759	-1				2009-05-28 10:30:00	187	26.553	3
2009-05-28 10:45:00	19	-16.1384	0				2009-05-28 10:45:00	188	26.7338	3
2009-05-28 11:00:00	18	-10.759	-1				2009-05-28 11:00:00	187	26.553	1
2009-05-28 11:15:00	18	-10.759	-1				2009-05-28 11:15:00	187	26.553	0
2009-05-28 11:30:00	18	-10.759	0				2009-05-28 11:30:00	185	26.1933	-2
2009-05-28 11:45:00	18	-10.759	-1				2009-05-28 11:45:00	186	26.3729	-2
2009-05-28 12:00:00	18	-10.759	X				2009-05-28 12:00:00	185	26.1933	X
2009-05-28 12:15:00	18	-10.759	X				2009-05-28 12:15:00	186	26.3729	X
2009-05-28 12:30:00	23	-37.6564	X				2009-05-28 12:30:00	142	18.9088	X
2009-05-28 12:45:00	20	-21.5179	X				2009-05-28 12:45:00	148	19.8829	X
2009-05-28 13:00:00	18	-10.759	0				2009-05-28 13:00:00	187	26.553	2
2009-05-28 13:15:00	18	-10.759	0				2009-05-28 13:15:00	188	26.7338	2
2009-05-28 13:30:00	18	-10.759	-5				2009-05-28 13:30:00	173	24.0794	31	24.0794
2009-05-28 13:45:00	18	-10.759	-2				2009-05-28 13:45:00	179	25.127	31	25.127
2009-05-28 14:00:00	18	-10.759	0				2009-05-28 14:00:00	188	26.7338	1
2009-05-28 14:15:00	18	-10.759	0				2009-05-28 14:15:00	188	26.7338	0
2009-05-28 14:30:00	18	-10.759	0				2009-05-28 14:30:00	188	26.7338	15
2009-05-28 14:45:00	24	-43.0358	6				2009-05-28 14:45:00	151	20.3741	-28
2009-05-28 15:00:00	24	-43.0358	6				2009-05-28 15:00:00	156	21.1996	-32		21.1996
2009-05-28 15:15:00	23	-37.6564	5				2009-05-28 15:15:00	156	21.1996	-32		21.1996
2009-05-28 15:30:00	16	0	-2				2009-05-28 15:30:00	189	26.9151	1
2009-05-28 15:45:00	19	-16.1384	-5				2009-05-28 15:45:00	182	25.6577	31	25.6577
2009-05-28 16:00:00	20	-21.5179	-4				2009-05-28 16:00:00	162	22.2023	6
2009-05-28 16:15:00	17	-5.37948	-6				2009-05-28 16:15:00	170	23.5621	14
2009-05-28 16:30:00	20	-21.5179	4				2009-05-28 16:30:00	170	23.5621	-19
2009-05-28 16:45:00	19	-16.1384	0				2009-05-28 16:45:00	161	22.0342	-21
2009-05-28 17:00:00	19	-16.1384	-1				2009-05-28 17:00:00	167	23.0489	5
2009-05-28 17:15:00	18	-10.759	1				2009-05-28 17:15:00	168	23.2195	-2
2009-05-28 17:30:00	18	-10.759	-2				2009-05-28 17:30:00	168	23.2195	-2
2009-05-28 17:45:00	18	-10.759	-1				2009-05-28 17:45:00	161	22.0342	0
2009-05-28 18:00:00	18	-10.759	X				2009-05-28 18:00:00	166	22.8787	X
2009-05-28 18:15:00	18	-10.759	X				2009-05-28 18:15:00	171	23.7341	X
2009-05-28 18:30:00	48	-172.143	X				2009-05-28 18:30:00	115	14.627	X
2009-05-28 18:45:00	18	-10.759	X				2009-05-28 18:45:00	161	22.0342	X
2009-05-28 19:00:00	19	-16.1384	1				2009-05-28 19:00:00	167	23.0489	1
2009-05-28 19:15:00	18	-10.759	0				2009-05-28 19:15:00	161	22.0342	-10
2009-05-28 19:30:00	18	-10.759	-30				2009-05-28 19:30:00	146	19.557	31	19.557
2009-05-28 19:45:00	25	-48.4153	7				2009-05-28 19:45:00	153	20.7033	-8
2009-05-28 20:00:00	16	0	-3				2009-05-28 20:00:00	184	26.0142	17
2009-05-28 20:15:00	16	0	-2				2009-05-28 20:15:00	189	26.9151	28
2009-05-28 20:30:00	16	0	-2				2009-05-28 20:30:00	177	24.7758	31	24.7758
2009-05-28 20:45:00	16	0	-9				2009-05-28 20:45:00	184	26.0142	31	26.0142
2009-05-28 21:00:00	16	0	0				2009-05-28 21:00:00	189	26.9151	5
2009-05-28 21:15:00	16	0	0				2009-05-28 21:15:00	188	26.7338	-1
2009-05-28 21:30:00	19	-16.1384	3				2009-05-28 21:30:00	185	26.1933	8
2009-05-28 21:45:00	19	-16.1384	3				2009-05-28 21:45:00	153	20.7033	-31
2009-05-28 22:00:00	23	-37.6564	7				2009-05-28 22:00:00	157	21.3657	-32		21.3657
2009-05-28 22:15:00	19	-16.1384	3				2009-05-28 22:15:00	156	21.1996	-32		21.1996
2009-05-28 22:30:00	19	-16.1384	0				2009-05-28 22:30:00	154	20.8684	-31
2009-05-28 22:45:00	29	-69.9332	10				2009-05-28 22:45:00	134	17.625	-19
2009-05-28 23:00:00	18	-10.759	-5				2009-05-28 23:00:00	166	22.8787	9
2009-05-28 23:15:00	18	-10.759	-1				2009-05-28 23:15:00	161	22.0342	5
2009-05-28 23:30:00	16	0	-3				2009-05-28 23:30:00	177	24.7758	23
2009-05-28 23:45:00	17	-5.37948	-12				2009-05-28 23:45:00	165	22.709	31	22.709
2009-05-29	17	-5.37948	X				2009-05-29	176	24.601	X
2009-05-29 00:15:00	17	-5.37948	X				2009-05-29 00:15:00	170	23.5621	X
2009-05-29 00:30:00	18	-10.759	X				2009-05-29 00:30:00	152	20.5385	X
2009-05-29 00:45:00	18	-10.759	X				2009-05-29 00:45:00	169	23.3906	X
2009-05-29 01:00:00	17	-5.37948	0				2009-05-29 01:00:00	167	23.0489	-9
2009-05-29 01:15:00	17	-5.37948	0				2009-05-29 01:15:00	169	23.3906	-1
2009-05-29 01:30:00	17	-5.37948	-1				2009-05-29 01:30:00	168	23.2195	16
2009-05-29 01:45:00	20	-21.5179	2				2009-05-29 01:45:00	137	18.1046	-32		18.1046
2009-05-29 02:00:00	20	-21.5179	3				2009-05-29 02:00:00	140	18.5863	-27
2009-05-29 02:15:00	20	-21.5179	3				2009-05-29 02:15:00	140	18.5863	-29
2009-05-29 02:30:00	20	-21.5179	3				2009-05-29 02:30:00	138	18.2649	-30
2009-05-29 02:45:00	19	-16.1384	-1				2009-05-29 02:45:00	137	18.1046	0
2009-05-29 03:00:00	20	-21.5179	0				2009-05-29 03:00:00	136	17.9445	-4
2009-05-29 03:15:00	23	-37.6564	3				2009-05-29 03:15:00	124	16.04	-16
2009-05-29 03:30:00	20	-21.5179	0				2009-05-29 03:30:00	134	17.625	-4
2009-05-29 03:45:00	18	-10.759	-1				2009-05-29 03:45:00	168	23.2195	31	23.2195
2009-05-29 04:00:00	19	-16.1384	-1				2009-05-29 04:00:00	167	23.0489	31	23.0489
2009-05-29 04:15:00	23	-37.6564	0				2009-05-29 04:15:00	124	16.04	0
2009-05-29 04:30:00	20	-21.5179	0				2009-05-29 04:30:00	130	16.9887	-4
2009-05-29 04:45:00	18	-10.759	0				2009-05-29 04:45:00	136	17.9445	-32		17.9445
2009-05-29 05:00:00	19	-16.1384	0				2009-05-29 05:00:00	181	25.4803	14
2009-05-29 05:15:00	25	-48.4153	2				2009-05-29 05:15:00	117	14.9402	-7
2009-05-29 05:30:00	18	-10.759	-2				2009-05-29 05:30:00	161	22.0342	31	22.0342
2009-05-29 05:45:00	28	-64.5538	10				2009-05-29 05:45:00	130	16.9887	-6
2009-05-29 06:00:00	16	0	X				2009-05-29 06:00:00	136	17.9445	X
2009-05-29 06:15:00	17	-5.37948	X				2009-05-29 06:15:00	176	24.601	X
2009-05-29 06:30:00	17	-5.37948	X				2009-05-29 06:30:00	170	23.5621	X
2009-05-29 06:45:00	18	-10.759	X				2009-05-29 06:45:00	172	23.9065	X
2009-05-29 07:00:00	26	-53.7948	10				2009-05-29 07:00:00	155	21.0338	19
2009-05-29 07:15:00	18	-10.759	1				2009-05-29 07:15:00	145	19.3945	-31
2009-05-29 07:30:00	17	-5.37948	0				2009-05-29 07:30:00	165	22.709	-5
2009-05-29 07:45:00	18	-10.759	0				2009-05-29 07:45:00	171	23.7341	-1
2009-05-29 08:00:00	18	-10.759	-8				2009-05-29 08:00:00	170	23.5621	15
2009-05-29 08:15:00	18	-10.759	0				2009-05-29 08:15:00	170	23.5621	25
2009-05-29 08:30:00	20	-21.5179	3				2009-05-29 08:30:00	133	17.4656	-32		17.4656
2009-05-29 08:45:00	18	-10.759	0				2009-05-29 08:45:00	170	23.5621	-1
2009-05-29 09:00:00	17	-5.37948	-1				2009-05-29 09:00:00	170	23.5621	0
2009-05-29 09:15:00	22	-32.2769	4				2009-05-29 09:15:00	138	18.2649	-32		18.2649
2009-05-29 09:30:00	19	-16.1384	-1				2009-05-29 09:30:00	159	21.6992	26
2009-05-29 09:45:00	21	-26.8974	3				2009-05-29 09:45:00	138	18.2649	-32		18.2649
2009-05-29 10:00:00	18	-10.759	1				2009-05-29 10:00:00	157	21.3657	-13
2009-05-29 10:15:00	19	-16.1384	-3				2009-05-29 10:15:00	148	19.8829	10
2009-05-29 10:30:00	20	-21.5179	1				2009-05-29 10:30:00	169	23.3906	10
2009-05-29 10:45:00	21	-26.8974	0				2009-05-29 10:45:00	142	18.9088	4
2009-05-29 11:00:00	24	-43.0358	6				2009-05-29 11:00:00	135	17.7847	-22
2009-05-29 11:15:00	18	-10.759	-1				2009-05-29 11:15:00	155	21.0338	7
2009-05-29 11:30:00	18	-10.759	-2				2009-05-29 11:30:00	173	24.0794	4
2009-05-29 11:45:00	22	-32.2769	1				2009-05-29 11:45:00	135	17.7847	-7
2009-05-29 12:00:00	22	-32.2769	X				2009-05-29 12:00:00	137	18.1046	X
2009-05-29 12:15:00	27	-59.1743	X				2009-05-29 12:15:00	148	19.8829	X
2009-05-29 12:30:00	20	-21.5179	X				2009-05-29 12:30:00	137	18.1046	X
2009-05-29 12:45:00	22	-32.2769	X				2009-05-29 12:45:00	138	18.2649	X
2009-05-29 13:00:00	21	-26.8974	-1				2009-05-29 13:00:00	135	17.7847	-2
2009-05-29 13:15:00	22	-32.2769	-5				2009-05-29 13:15:00	126	16.3555	-22
2009-05-29 13:30:00	18	-10.759	-2				2009-05-29 13:30:00	167	23.0489	30
2009-05-29 13:45:00	29	-69.9332	7				2009-05-29 13:45:00	146	19.557	8
2009-05-29 14:00:00	22	-32.2769	1				2009-05-29 14:00:00	133	17.4656	-2
2009-05-29 14:15:00	18	-10.759	-4				2009-05-29 14:15:00	157	21.3657	31	21.3657
2009-05-29 14:30:00	18	-10.759	0				2009-05-29 14:30:00	165	22.709	-2
2009-05-29 14:45:00	19	-16.1384	-10				2009-05-29 14:45:00	165	22.709	19
2009-05-29 15:00:00	25	-48.4153	3				2009-05-29 15:00:00	139	18.4255	6
2009-05-29 15:15:00	16	0	-2				2009-05-29 15:15:00	179	25.127	22
2009-05-29 15:30:00	17	-5.37948	-1				2009-05-29 15:30:00	167	23.0489	2
2009-05-29 15:45:00	16	0	-3				2009-05-29 15:45:00	181	25.4803	16
2009-05-29 16:00:00	16	0	-9				2009-05-29 16:00:00	170	23.5621	31	23.5621
2009-05-29 16:15:00	16	0	0				2009-05-29 16:15:00	185	26.1933	6
2009-05-29 16:30:00	16	0	-1				2009-05-29 16:30:00	185	26.1933	18
2009-05-29 16:45:00	16	0	0				2009-05-29 16:45:00	184	26.0142	3
2009-05-29 17:00:00	21	-26.8974	5				2009-05-29 17:00:00	163	22.3708	-7
2009-05-29 17:15:00	16	0	0				2009-05-29 17:15:00	185	26.1933	0
2009-05-29 17:30:00	17	-5.37948	1				2009-05-29 17:30:00	158	21.5323	-27
2009-05-29 17:45:00	16	0	0				2009-05-29 17:45:00	185	26.1933	1
2009-05-29 18:00:00	24	-43.0358	X				2009-05-29 18:00:00	161	22.0342	X
2009-05-29 18:15:00	16	0	X				2009-05-29 18:15:00	182	25.6577	X
2009-05-29 18:30:00	21	-26.8974	X				2009-05-29 18:30:00	172	23.9065	X
2009-05-29 18:45:00	16	0	X				2009-05-29 18:45:00	185	26.1933	X
2009-05-29 19:00:00	16	0	-8				2009-05-29 19:00:00	185	26.1933	24
2009-05-29 19:15:00	16	0	0				2009-05-29 19:15:00	183	25.8357	1
2009-05-29 19:30:00	16	0	-5				2009-05-29 19:30:00	176	24.601	4
2009-05-29 19:45:00	17	-5.37948	1				2009-05-29 19:45:00	184	26.0142	-1
2009-05-29 20:00:00	18	-10.759	2				2009-05-29 20:00:00	169	23.3906	-16
2009-05-29 20:15:00	21	-26.8974	5				2009-05-29 20:15:00	151	20.3741	-32		20.3741
2009-05-29 20:30:00	17	-5.37948	1				2009-05-29 20:30:00	168	23.2195	-8
2009-05-29 20:45:00	16	0	-1				2009-05-29 20:45:00	183	25.8357	-1
2009-05-29 21:00:00	16	0	-2				2009-05-29 21:00:00	181	25.4803	12
2009-05-29 21:15:00	16	0	-5				2009-05-29 21:15:00	182	25.6577	31	25.6577
2009-05-29 21:30:00	16	0	-1				2009-05-29 21:30:00	181	25.4803	13
2009-05-29 21:45:00	16	0	0				2009-05-29 21:45:00	151	20.3741	-32		20.3741
2009-05-29 22:00:00	16	0	0				2009-05-29 22:00:00	181	25.4803	0
2009-05-29 22:15:00	16	0	0				2009-05-29 22:15:00	181	25.4803	-1
2009-05-29 22:30:00	16	0	0				2009-05-29 22:30:00	178	24.9512	-3
2009-05-29 22:45:00	16	0	0				2009-05-29 22:45:00	170	23.5621	19
2009-05-29 23:00:00	16	0	0				2009-05-29 23:00:00	176	24.601	-5
2009-05-29 23:15:00	18	-10.759	2				2009-05-29 23:15:00	169	23.3906	-12
2009-05-29 23:30:00	16	0	0				2009-05-29 23:30:00	173	24.0794	-5
2009-05-29 23:45:00	18	-10.759	2				2009-05-29 23:45:00	169	23.3906	-1
2009-05-30	17	-5.37948	X				2009-05-30	166	22.8787	X
2009-05-30 00:15:00	17	-5.37948	X				2009-05-30 00:15:00	164	22.5397	X
2009-05-30 00:30:00	18	-10.759	X				2009-05-30 00:30:00	158	21.5323	X
2009-05-30 00:45:00	18	-10.759	X				2009-05-30 00:45:00	163	22.3708	X
2009-05-30 01:00:00	16	0	-1				2009-05-30 01:00:00	167	23.0489	1
2009-05-30 01:15:00	16	0	-1				2009-05-30 01:15:00	164	22.5397	0
2009-05-30 01:30:00	18	-10.759	0				2009-05-30 01:30:00	160	21.8665	2
2009-05-30 01:45:00	17	-5.37948	-1				2009-05-30 01:45:00	154	20.8684	-9
2009-05-30 02:00:00	17	-5.37948	1				2009-05-30 02:00:00	157	21.3657	-10
2009-05-30 02:15:00	17	-5.37948	1				2009-05-30 02:15:00	153	20.7033	-11
2009-05-30 02:30:00	17	-5.37948	-1				2009-05-30 02:30:00	146	19.557	-14
2009-05-30 02:45:00	17	-5.37948	0				2009-05-30 02:45:00	159	21.6992	5
2009-05-30 03:00:00	16	0	-1				2009-05-30 03:00:00	157	21.3657	0
2009-05-30 03:15:00	16	0	-1				2009-05-30 03:15:00	154	20.8684	1
2009-05-30 03:30:00	16	0	-1				2009-05-30 03:30:00	150	20.2101	4
2009-05-30 03:45:00	16	0	-1				2009-05-30 03:45:00	149	20.0463	-10
2009-05-30 04:00:00	16	0	0				2009-05-30 04:00:00	145	19.3945	-12
2009-05-30 04:15:00	17	-5.37948	1				2009-05-30 04:15:00	146	19.557	-8
2009-05-30 04:30:00	16	0	0				2009-05-30 04:30:00	147	19.7198	-3
2009-05-30 04:45:00	16	0	0				2009-05-30 04:45:00	147	19.7198	-2
2009-05-30 05:00:00	16	0	0				2009-05-30 05:00:00	149	20.0463	4
2009-05-30 05:15:00	17	-5.37948	0				2009-05-30 05:15:00	151	20.3741	5
2009-05-30 05:30:00	17	-5.37948	1				2009-05-30 05:30:00	155	21.0338	8
2009-05-30 05:45:00	17	-5.37948	1				2009-05-30 05:45:00	149	20.0463	2
2009-05-30 06:00:00	16	0	X				2009-05-30 06:00:00	158	21.5323	X
2009-05-30 06:15:00	16	0	X				2009-05-30 06:15:00	159	21.6992	X
2009-05-30 06:30:00	16	0	X				2009-05-30 06:30:00	158	21.5323	X
2009-05-30 06:45:00	16	0	X				2009-05-30 06:45:00	157	21.3657	X
2009-05-30 07:00:00	16	0	0				2009-05-30 07:00:00	155	21.0338	-3
2009-05-30 07:15:00	16	0	0				2009-05-30 07:15:00	152	20.5385	-7
2009-05-30 07:30:00	16	0	0				2009-05-30 07:30:00	153	20.7033	-5
2009-05-30 07:45:00	16	0	0				2009-05-30 07:45:00	151	20.3741	-6
2009-05-30 08:00:00	17	-5.37948	1				2009-05-30 08:00:00	134	17.625	-21
2009-05-30 08:15:00	16	0	0				2009-05-30 08:15:00	149	20.0463	-3
2009-05-30 08:30:00	16	0	0				2009-05-30 08:30:00	147	19.7198	-6
2009-05-30 08:45:00	16	0	0				2009-05-30 08:45:00	147	19.7198	-4
2009-05-30 09:00:00	16	0	-1				2009-05-30 09:00:00	147	19.7198	13
2009-05-30 09:15:00	16	0	0				2009-05-30 09:15:00	147	19.7198	-2
2009-05-30 09:30:00	16	0	0				2009-05-30 09:30:00	147	19.7198	0
2009-05-30 09:45:00	16	0	0				2009-05-30 09:45:00	146	19.557	-1
2009-05-30 10:00:00	47	-166.764	31	-166.764			2009-05-30 10:00:00	115	14.627	-32		14.627
2009-05-30 10:15:00	47	-166.764	31	-166.764			2009-05-30 10:15:00	115	14.627	-32		14.627
2009-05-30 10:30:00	16	0	0				2009-05-30 10:30:00	142	18.9088	-5
2009-05-30 10:45:00	16	0	0				2009-05-30 10:45:00	143	19.0704	-3
2009-05-30 11:00:00	16	0	-31				2009-05-30 11:00:00	143	19.0704	28
2009-05-30 11:15:00	18	-10.759	-29				2009-05-30 11:15:00	139	18.4255	24
2009-05-30 11:30:00	20	-21.5179	4				2009-05-30 11:30:00	144	19.2323	2
2009-05-30 11:45:00	16	0	0				2009-05-30 11:45:00	144	19.2323	1
2009-05-30 12:00:00	17	-5.37948	X				2009-05-30 12:00:00	144	19.2323	X
2009-05-30 12:15:00	17	-5.37948	X				2009-05-30 12:15:00	143	19.0704	X
2009-05-30 12:30:00	19	-16.1384	X				2009-05-30 12:30:00	144	19.2323	X
2009-05-30 12:45:00	19	-16.1384	X				2009-05-30 12:45:00	144	19.2323	X
2009-05-30 13:00:00	16	0	-1				2009-05-30 13:00:00	144	19.2323	0
2009-05-30 13:15:00	16	0	-1				2009-05-30 13:15:00	144	19.2323	1
2009-05-30 13:30:00	16	0	-3				2009-05-30 13:30:00	144	19.2323	0
2009-05-30 13:45:00	16	0	-3				2009-05-30 13:45:00	142	18.9088	-2
2009-05-30 14:00:00	16	0	0				2009-05-30 14:00:00	144	19.2323	0
2009-05-30 14:15:00	16	0	0				2009-05-30 14:15:00	143	19.0704	-1
2009-05-30 14:30:00	16	0	0				2009-05-30 14:30:00	143	19.0704	-1
2009-05-30 14:45:00	19	-16.1384	3				2009-05-30 14:45:00	143	19.0704	1
2009-05-30 15:00:00	16	0	0				2009-05-30 15:00:00	144	19.2323	0
2009-05-30 15:15:00	16	0	0				2009-05-30 15:15:00	144	19.2323	1
2009-05-30 15:30:00	16	0	0				2009-05-30 15:30:00	144	19.2323	1
2009-05-30 15:45:00	16	0	-3				2009-05-30 15:45:00	144	19.2323	1
2009-05-30 16:00:00	16	0	0				2009-05-30 16:00:00	145	19.3945	1
2009-05-30 16:15:00	16	0	0				2009-05-30 16:15:00	145	19.3945	1
2009-05-30 16:30:00	16	0	0				2009-05-30 16:30:00	146	19.557	2
2009-05-30 16:45:00	16	0	0				2009-05-30 16:45:00	147	19.7198	3
2009-05-30 17:00:00	16	0	0				2009-05-30 17:00:00	147	19.7198	2
2009-05-30 17:15:00	16	0	0				2009-05-30 17:15:00	148	19.8829	3
2009-05-30 17:30:00	22	-32.2769	6				2009-05-30 17:30:00	146	19.557	0
2009-05-30 17:45:00	16	0	0				2009-05-30 17:45:00	150	20.2101	3
2009-05-30 18:00:00	16	0	X				2009-05-30 18:00:00	151	20.3741	X
2009-05-30 18:15:00	16	0	X				2009-05-30 18:15:00	152	20.5385	X
2009-05-30 18:30:00	16	0	X				2009-05-30 18:30:00	154	20.8684	X
2009-05-30 18:45:00	16	0	X				2009-05-30 18:45:00	155	21.0338	X
2009-05-30 19:00:00	16	0	0				2009-05-30 19:00:00	156	21.1996	5
2009-05-30 19:15:00	19	-16.1384	3				2009-05-30 19:15:00	143	19.0704	-9
2009-05-30 19:30:00	16	0	0				2009-05-30 19:30:00	156	21.1996	2
2009-05-30 19:45:00	16	0	0				2009-05-30 19:45:00	155	21.0338	0
2009-05-30 20:00:00	16	0	0				2009-05-30 20:00:00	152	20.5385	-4
2009-05-30 20:15:00	16	0	-3				2009-05-30 20:15:00	158	21.5323	15
2009-05-30 20:30:00	16	0	0				2009-05-30 20:30:00	159	21.6992	3
2009-05-30 20:45:00	16	0	0				2009-05-30 20:45:00	159	21.6992	4
2009-05-30 21:00:00	16	0	0				2009-05-30 21:00:00	159	21.6992	7
2009-05-30 21:15:00	16	0	0				2009-05-30 21:15:00	159	21.6992	1
2009-05-30 21:30:00	16	0	0				2009-05-30 21:30:00	160	21.8665	1
2009-05-30 21:45:00	16	0	0				2009-05-30 21:45:00	159	21.6992	0
2009-05-30 22:00:00	16	0	0				2009-05-30 22:00:00	159	21.6992	0
2009-05-30 22:15:00	16	0	0				2009-05-30 22:15:00	159	21.6992	0
2009-05-30 22:30:00	16	0	0				2009-05-30 22:30:00	158	21.5323	-2
2009-05-30 22:45:00	16	0	0				2009-05-30 22:45:00	159	21.6992	0
2009-05-30 23:00:00	16	0	0				2009-05-30 23:00:00	159	21.6992	0
2009-05-30 23:15:00	16	0	0				2009-05-30 23:15:00	158	21.5323	-1
2009-05-30 23:30:00	16	0	0				2009-05-30 23:30:00	157	21.3657	-1
2009-05-30 23:45:00	16	0	0				2009-05-30 23:45:00	157	21.3657	-2
2009-05-31	16	0	X				2009-05-31	155	21.0338	X
2009-05-31 00:15:00	24	-43.0358	X				2009-05-31 00:15:00	147	19.7198	X
2009-05-31 00:30:00	16	0	X				2009-05-31 00:30:00	152	20.5385	X
2009-05-31 00:45:00	16	0	X				2009-05-31 00:45:00	154	20.8684	X
2009-05-31 01:00:00	16	0	0				2009-05-31 01:00:00	152	20.5385	-3
2009-05-31 01:15:00	16	0	-8				2009-05-31 01:15:00	154	20.8684	7
2009-05-31 01:30:00	24	-43.0358	8				2009-05-31 01:30:00	149	20.0463	-3
2009-05-31 01:45:00	16	0	0				2009-05-31 01:45:00	154	20.8684	0
2009-05-31 02:00:00	17	-5.37948	1				2009-05-31 02:00:00	152	20.5385	0
2009-05-31 02:15:00	18	-10.759	2				2009-05-31 02:15:00	151	20.3741	-3
2009-05-31 02:30:00	16	0	-8				2009-05-31 02:30:00	152	20.5385	3
2009-05-31 02:45:00	16	0	0				2009-05-31 02:45:00	152	20.5385	-2
2009-05-31 03:00:00	16	0	-1				2009-05-31 03:00:00	152	20.5385	0
2009-05-31 03:15:00	16	0	-2				2009-05-31 03:15:00	152	20.5385	1
2009-05-31 03:30:00	16	0	0				2009-05-31 03:30:00	146	19.557	-6
2009-05-31 03:45:00	17	-5.37948	1				2009-05-31 03:45:00	146	19.557	-6
2009-05-31 04:00:00	16	0	0				2009-05-31 04:00:00	145	19.3945	-7
2009-05-31 04:15:00	17	-5.37948	1				2009-05-31 04:15:00	136	17.9445	-16
2009-05-31 04:30:00	17	-5.37948	1				2009-05-31 04:30:00	145	19.3945	-1
2009-05-31 04:45:00	22	-32.2769	5				2009-05-31 04:45:00	132	17.3065	-14
2009-05-31 05:00:00	17	-5.37948	1				2009-05-31 05:00:00	146	19.557	1
2009-05-31 05:15:00	16	0	-1				2009-05-31 05:15:00	145	19.3945	9
2009-05-31 05:30:00	18	-10.759	1				2009-05-31 05:30:00	147	19.7198	2
2009-05-31 05:45:00	17	-5.37948	-5				2009-05-31 05:45:00	146	19.557	14
2009-05-31 06:00:00	16	0	X				2009-05-31 06:00:00	147	19.7198	X
2009-05-31 06:15:00	16	0	X				2009-05-31 06:15:00	147	19.7198	X
2009-05-31 06:30:00	16	0	X				2009-05-31 06:30:00	146	19.557	X
2009-05-31 06:45:00	16	0	X				2009-05-31 06:45:00	147	19.7198	X
2009-05-31 07:00:00	16	0	0				2009-05-31 07:00:00	146	19.557	-1
2009-05-31 07:15:00	16	0	0				2009-05-31 07:15:00	146	19.557	-1
2009-05-31 07:30:00	16	0	0				2009-05-31 07:30:00	146	19.557	0
2009-05-31 07:45:00	16	0	0				2009-05-31 07:45:00	146	19.557	-1
2009-05-31 08:00:00	16	0	0				2009-05-31 08:00:00	146	19.557	0
2009-05-31 08:15:00	16	0	0				2009-05-31 08:15:00	146	19.557	0
2009-05-31 08:30:00	16	0	0				2009-05-31 08:30:00	146	19.557	0
2009-05-31 08:45:00	16	0	0				2009-05-31 08:45:00	146	19.557	0
2009-05-31 09:00:00	16	0	0				2009-05-31 09:00:00	145	19.3945	-1
2009-05-31 09:15:00	16	0	0				2009-05-31 09:15:00	146	19.557	0
2009-05-31 09:30:00	16	0	0				2009-05-31 09:30:00	145	19.3945	-1
2009-05-31 09:45:00	16	0	0				2009-05-31 09:45:00	146	19.557	0
2009-05-31 10:00:00	16	0	0				2009-05-31 10:00:00	145	19.3945	0
2009-05-31 10:15:00	16	0	0				2009-05-31 10:15:00	146	19.557	0
2009-05-31 10:30:00	16	0	0				2009-05-31 10:30:00	146	19.557	1
2009-05-31 10:45:00	16	0	0				2009-05-31 10:45:00	146	19.557	0
2009-05-31 11:00:00	16	0	0				2009-05-31 11:00:00	146	19.557	1
2009-05-31 11:15:00	16	0	0				2009-05-31 11:15:00	146	19.557	0
2009-05-31 11:30:00	16	0	0				2009-05-31 11:30:00	146	19.557	0
2009-05-31 11:45:00	16	0	0				2009-05-31 11:45:00	146	19.557	0
2009-05-31 12:00:00	17	-5.37948	X				2009-05-31 12:00:00	146	19.557	X
2009-05-31 12:15:00	17	-5.37948	X				2009-05-31 12:15:00	146	19.557	X
2009-05-31 12:30:00	16	0	X				2009-05-31 12:30:00	147	19.7198	X
2009-05-31 12:45:00	16	0	X				2009-05-31 12:45:00	147	19.7198	X
2009-05-31 13:00:00	16	0	-1				2009-05-31 13:00:00	146	19.557	0
2009-05-31 13:15:00	16	0	-1				2009-05-31 13:15:00	146	19.557	0
2009-05-31 13:30:00	17	-5.37948	1				2009-05-31 13:30:00	147	19.7198	0
2009-05-31 13:45:00	17	-5.37948	1				2009-05-31 13:45:00	147	19.7198	0
2009-05-31 14:00:00	17	-5.37948	1				2009-05-31 14:00:00	147	19.7198	1
2009-05-31 14:15:00	17	-5.37948	1				2009-05-31 14:15:00	147	19.7198	1
2009-05-31 14:30:00	16	0	-1				2009-05-31 14:30:00	146	19.557	-1
2009-05-31 14:45:00	18	-10.759	1				2009-05-31 14:45:00	146	19.557	-1
2009-05-31 15:00:00	16	0	-1				2009-05-31 15:00:00	147	19.7198	0
2009-05-31 15:15:00	16	0	-1				2009-05-31 15:15:00	147	19.7198	0
2009-05-31 15:30:00	16	0	0				2009-05-31 15:30:00	147	19.7198	1
2009-05-31 15:45:00	16	0	-2				2009-05-31 15:45:00	147	19.7198	1
2009-05-31 16:00:00	18	-10.759	2				2009-05-31 16:00:00	146	19.557	-1
2009-05-31 16:15:00	22	-32.2769	6				2009-05-31 16:15:00	145	19.3945	-2
2009-05-31 16:30:00	16	0	0				2009-05-31 16:30:00	146	19.557	-1
2009-05-31 16:45:00	16	0	0				2009-05-31 16:45:00	146	19.557	-1
2009-05-31 17:00:00	18	-10.759	0				2009-05-31 17:00:00	145	19.3945	-1
2009-05-31 17:15:00	17	-5.37948	-5				2009-05-31 17:15:00	139	18.4255	-6
2009-05-31 17:30:00	17	-5.37948	1				2009-05-31 17:30:00	145	19.3945	-1
2009-05-31 17:45:00	18	-10.759	2				2009-05-31 17:45:00	139	18.4255	-7
2009-05-31 18:00:00	23	-37.6564	X				2009-05-31 18:00:00	130	16.9887	X
2009-05-31 18:15:00	19	-16.1384	X				2009-05-31 18:15:00	136	17.9445	X
2009-05-31 18:30:00	17	-5.37948	X				2009-05-31 18:30:00	145	19.3945	X
2009-05-31 18:45:00	17	-5.37948	X				2009-05-31 18:45:00	137	18.1046	X
2009-05-31 19:00:00	16	0	-7				2009-05-31 19:00:00	149	20.0463	19
2009-05-31 19:15:00	16	0	-3				2009-05-31 19:15:00	149	20.0463	13
2009-05-31 19:30:00	16	0	-1				2009-05-31 19:30:00	149	20.0463	4
2009-05-31 19:45:00	17	-5.37948	0				2009-05-31 19:45:00	148	19.8829	11
2009-05-31 20:00:00	16	0	0				2009-05-31 20:00:00	148	19.8829	-1
2009-05-31 20:15:00	16	0	0				2009-05-31 20:15:00	137	18.1046	-12
2009-05-31 20:30:00	16	0	0				2009-05-31 20:30:00	149	20.0463	0
2009-05-31 20:45:00	16	0	-1				2009-05-31 20:45:00	150	20.2101	2
2009-05-31 21:00:00	34	-96.8306	18				2009-05-31 21:00:00	129	16.8301	-19
2009-05-31 21:15:00	16	0	0				2009-05-31 21:15:00	149	20.0463	12
2009-05-31 21:30:00	16	0	0				2009-05-31 21:30:00	150	20.2101	1
2009-05-31 21:45:00	16	0	0				2009-05-31 21:45:00	149	20.0463	-1
2009-05-31 22:00:00	28	-64.5538	-6				2009-05-31 22:00:00	142	18.9088	13
2009-05-31 22:15:00	16	0	0				2009-05-31 22:15:00	151	20.3741	2
2009-05-31 22:30:00	30	-75.3127	14				2009-05-31 22:30:00	130	16.9887	-20
2009-05-31 22:45:00	17	-5.37948	1				2009-05-31 22:45:00	150	20.2101	1
2009-05-31 23:00:00	29	-69.9332	1				2009-05-31 23:00:00	126	16.3555	-16
2009-05-31 23:15:00	16	0	0				2009-05-31 23:15:00	150	20.2101	-1
2009-05-31 23:30:00	16	0	-14				2009-05-31 23:30:00	142	18.9088	12
2009-05-31 23:45:00	16	0	-1				2009-05-31 23:45:00	149	20.0463	-1
2009-06-01	16	0	X				2009-06-01	149	20.0463	X
2009-06-01 00:15:00	18	-10.759	X				2009-06-01 00:15:00	135	17.7847	X
2009-06-01 00:30:00	28	-64.5538	X				2009-06-01 00:30:00	134	17.625	X
2009-06-01 00:45:00	16	0	X				2009-06-01 00:45:00	149	20.0463	X
2009-06-01 01:00:00	16	0	0				2009-06-01 01:00:00	149	20.0463	0
2009-06-01 01:15:00	16	0	-2				2009-06-01 01:15:00	146	19.557	11
2009-06-01 01:30:00	16	0	-12				2009-06-01 01:30:00	140	18.5863	6
2009-06-01 01:45:00	18	-10.759	2				2009-06-01 01:45:00	147	19.7198	-2
2009-06-01 02:00:00	21	-26.8974	5				2009-06-01 02:00:00	135	17.7847	-14
2009-06-01 02:15:00	17	-5.37948	1				2009-06-01 02:15:00	142	18.9088	-4
2009-06-01 02:30:00	16	0	0				2009-06-01 02:30:00	148	19.8829	8
2009-06-01 02:45:00	16	0	-2				2009-06-01 02:45:00	149	20.0463	2
2009-06-01 03:00:00	16	0	-5				2009-06-01 03:00:00	148	19.8829	13
2009-06-01 03:15:00	18	-10.759	1				2009-06-01 03:15:00	147	19.7198	5
2009-06-01 03:30:00	19	-16.1384	3				2009-06-01 03:30:00	148	19.8829	0
2009-06-01 03:45:00	16	0	0				2009-06-01 03:45:00	148	19.8829	-1
2009-06-01 04:00:00	16	0	0				2009-06-01 04:00:00	148	19.8829	0
2009-06-01 04:15:00	16	0	-2				2009-06-01 04:15:00	148	19.8829	1
2009-06-01 04:30:00	17	-5.37948	-2				2009-06-01 04:30:00	147	19.7198	-1
2009-06-01 04:45:00	16	0	0				2009-06-01 04:45:00	148	19.8829	0
2009-06-01 05:00:00	16	0	0				2009-06-01 05:00:00	148	19.8829	0
2009-06-01 05:15:00	16	0	0				2009-06-01 05:15:00	148	19.8829	0
2009-06-01 05:30:00	16	0	-1				2009-06-01 05:30:00	148	19.8829	1
2009-06-01 05:45:00	20	-21.5179	4				2009-06-01 05:45:00	148	19.8829	0
2009-06-01 06:00:00	22	-32.2769	X				2009-06-01 06:00:00	147	19.7198	X
2009-06-01 06:15:00	18	-10.759	X				2009-06-01 06:15:00	145	19.3945	X
2009-06-01 06:30:00	20	-21.5179	X				2009-06-01 06:30:00	145	19.3945	X
2009-06-01 06:45:00	20	-21.5179	X				2009-06-01 06:45:00	145	19.3945	X
2009-06-01 07:00:00	16	0	-6				2009-06-01 07:00:00	147	19.7198	0
2009-06-01 07:15:00	19	-16.1384	1				2009-06-01 07:15:00	146	19.557	1
2009-06-01 07:30:00	20	-21.5179	0				2009-06-01 07:30:00	146	19.557	1
2009-06-01 07:45:00	20	-21.5179	0				2009-06-01 07:45:00	146	19.557	1
2009-06-01 08:00:00	16	0	0				2009-06-01 08:00:00	147	19.7198	0
2009-06-01 08:15:00	16	0	-3				2009-06-01 08:15:00	147	19.7198	1
2009-06-01 08:30:00	16	0	-4				2009-06-01 08:30:00	147	19.7198	1
2009-06-01 08:45:00	16	0	-4				2009-06-01 08:45:00	147	19.7198	1
2009-06-01 09:00:00	16	0	0				2009-06-01 09:00:00	146	19.557	-1
2009-06-01 09:15:00	16	0	0				2009-06-01 09:15:00	146	19.557	-1
2009-06-01 09:30:00	16	0	0				2009-06-01 09:30:00	146	19.557	-1
2009-06-01 09:45:00	16	0	0				2009-06-01 09:45:00	146	19.557	-1
2009-06-01 10:00:00	16	0	0				2009-06-01 10:00:00	147	19.7198	1
2009-06-01 10:15:00	16	0	0				2009-06-01 10:15:00	146	19.557	0
2009-06-01 10:30:00	16	0	0				2009-06-01 10:30:00	146	19.557	0
2009-06-01 10:45:00	18	-10.759	2				2009-06-01 10:45:00	147	19.7198	1
2009-06-01 11:00:00	18	-10.759	2				2009-06-01 11:00:00	147	19.7198	0
2009-06-01 11:15:00	17	-5.37948	1				2009-06-01 11:15:00	147	19.7198	1
2009-06-01 11:30:00	17	-5.37948	1				2009-06-01 11:30:00	147	19.7198	1
2009-06-01 11:45:00	17	-5.37948	-1				2009-06-01 11:45:00	147	19.7198	0
2009-06-01 12:00:00	17	-5.37948	X				2009-06-01 12:00:00	147	19.7198	X
2009-06-01 12:15:00	17	-5.37948	X				2009-06-01 12:15:00	147	19.7198	X
2009-06-01 12:30:00	18	-10.759	X				2009-06-01 12:30:00	147	19.7198	X
2009-06-01 12:45:00	16	0	X				2009-06-01 12:45:00	147	19.7198	X
2009-06-01 13:00:00	16	0	-1				2009-06-01 13:00:00	147	19.7198	0
2009-06-01 13:15:00	16	0	-1				2009-06-01 13:15:00	147	19.7198	0
2009-06-01 13:30:00	17	-5.37948	-1				2009-06-01 13:30:00	146	19.557	-1
2009-06-01 13:45:00	17	-5.37948	1				2009-06-01 13:45:00	146	19.557	-1
2009-06-01 14:00:00	17	-5.37948	1				2009-06-01 14:00:00	146	19.557	-1
2009-06-01 14:15:00	17	-5.37948	1				2009-06-01 14:15:00	146	19.557	-1
2009-06-01 14:30:00	17	-5.37948	0				2009-06-01 14:30:00	146	19.557	0
2009-06-01 14:45:00	16	0	-1				2009-06-01 14:45:00	146	19.557	0
2009-06-01 15:00:00	17	-5.37948	0				2009-06-01 15:00:00	146	19.557	0
2009-06-01 15:15:00	20	-21.5179	3				2009-06-01 15:15:00	139	18.4255	-7
2009-06-01 15:30:00	17	-5.37948	0				2009-06-01 15:30:00	146	19.557	0
2009-06-01 15:45:00	17	-5.37948	1				2009-06-01 15:45:00	146	19.557	0
2009-06-01 16:00:00	16	0	-1				2009-06-01 16:00:00	146	19.557	0
2009-06-01 16:15:00	16	0	-4				2009-06-01 16:15:00	146	19.557	7
2009-06-01 16:30:00	16	0	-1				2009-06-01 16:30:00	147	19.7198	1
2009-06-01 16:45:00	16	0	-1				2009-06-01 16:45:00	147	19.7198	1
2009-06-01 17:00:00	16	0	0				2009-06-01 17:00:00	146	19.557	0
2009-06-01 17:15:00	16	0	0				2009-06-01 17:15:00	146	19.557	0
2009-06-01 17:30:00	16	0	0				2009-06-01 17:30:00	148	19.8829	1
2009-06-01 17:45:00	16	0	0				2009-06-01 17:45:00	148	19.8829	1
2009-06-01 18:00:00	17	-5.37948	X				2009-06-01 18:00:00	146	19.557	X
2009-06-01 18:15:00	18	-10.759	X				2009-06-01 18:15:00	146	19.557	X
2009-06-01 18:30:00	16	0	X				2009-06-01 18:30:00	146	19.557	X
2009-06-01 18:45:00	19	-16.1384	X				2009-06-01 18:45:00	145	19.3945	X
2009-06-01 19:00:00	21	-26.8974	4				2009-06-01 19:00:00	124	16.04	-22
2009-06-01 19:15:00	19	-16.1384	1				2009-06-01 19:15:00	145	19.3945	-1
2009-06-01 19:30:00	24	-43.0358	8				2009-06-01 19:30:00	140	18.5863	-6
2009-06-01 19:45:00	20	-21.5179	1				2009-06-01 19:45:00	147	19.7198	2
2009-06-01 20:00:00	20	-21.5179	-1				2009-06-01 20:00:00	145	19.3945	21
2009-06-01 20:15:00	26	-53.7948	7				2009-06-01 20:15:00	135	17.7847	-10
2009-06-01 20:30:00	16	0	-8				2009-06-01 20:30:00	150	20.2101	10
2009-06-01 20:45:00	16	0	-4				2009-06-01 20:45:00	150	20.2101	3
2009-06-01 21:00:00	16	0	-4				2009-06-01 21:00:00	150	20.2101	5
2009-06-01 21:15:00	16	0	-10				2009-06-01 21:15:00	150	20.2101	15
2009-06-01 21:30:00	16	0	0				2009-06-01 21:30:00	151	20.3741	1
2009-06-01 21:45:00	16	0	0				2009-06-01 21:45:00	151	20.3741	1
2009-06-01 22:00:00	26	-53.7948	10				2009-06-01 22:00:00	142	18.9088	-8
2009-06-01 22:15:00	16	0	0				2009-06-01 22:15:00	151	20.3741	1
2009-06-01 22:30:00	16	0	0				2009-06-01 22:30:00	151	20.3741	0
2009-06-01 22:45:00	19	-16.1384	3				2009-06-01 22:45:00	122	15.7251	-29
2009-06-01 23:00:00	16	0	-10				2009-06-01 23:00:00	151	20.3741	9
2009-06-01 23:15:00	17	-5.37948	1				2009-06-01 23:15:00	151	20.3741	0
2009-06-01 23:30:00	25	-48.4153	9				2009-06-01 23:30:00	143	19.0704	-8
2009-06-01 23:45:00	22	-32.2769	3				2009-06-01 23:45:00	142	18.9088	20
2009-06-02	18	-10.759	X				2009-06-02	130	16.9887	X
2009-06-02 00:15:00	17	-5.37948	X				2009-06-02 00:15:00	146	19.557	X
2009-06-02 00:30:00	16	0	X				2009-06-02 00:30:00	147	19.7198	X
2009-06-02 00:45:00	16	0	X				2009-06-02 00:45:00	151	20.3741	X
2009-06-02 01:00:00	17	-5.37948	-1				2009-06-02 01:00:00	148	19.8829	18
2009-06-02 01:15:00	16	0	-1				2009-06-02 01:15:00	148	19.8829	2
2009-06-02 01:30:00	16	0	0				2009-06-02 01:30:00	147	19.7198	0
2009-06-02 01:45:00	16	0	0				2009-06-02 01:45:00	145	19.3945	-6
2009-06-02 02:00:00	20	-21.5179	3				2009-06-02 02:00:00	149	20.0463	1
2009-06-02 02:15:00	18	-10.759	2				2009-06-02 02:15:00	148	19.8829	0
2009-06-02 02:30:00	17	-5.37948	1				2009-06-02 02:30:00	151	20.3741	4
2009-06-02 02:45:00	16	0	0				2009-06-02 02:45:00	152	20.5385	7
2009-06-02 03:00:00	16	0	-4				2009-06-02 03:00:00	152	20.5385	3
2009-06-02 03:15:00	16	0	-2				2009-06-02 03:15:00	152	20.5385	4
2009-06-02 03:30:00	16	0	-1				2009-06-02 03:30:00	152	20.5385	1
2009-06-02 03:45:00	17	-5.37948	1				2009-06-02 03:45:00	153	20.7033	1
2009-06-02 04:00:00	16	0	0				2009-06-02 04:00:00	152	20.5385	0
2009-06-02 04:15:00	16	0	0				2009-06-02 04:15:00	153	20.7033	1
2009-06-02 04:30:00	17	-5.37948	1				2009-06-02 04:30:00	154	20.8684	2
2009-06-02 04:45:00	16	0	-1				2009-06-02 04:45:00	153	20.7033	0
2009-06-02 05:00:00	16	0	0				2009-06-02 05:00:00	153	20.7033	1
2009-06-02 05:15:00	17	-5.37948	1				2009-06-02 05:15:00	152	20.5385	-1
2009-06-02 05:30:00	18	-10.759	1				2009-06-02 05:30:00	151	20.3741	-3
2009-06-02 05:45:00	17	-5.37948	1				2009-06-02 05:45:00	151	20.3741	-2
2009-06-02 06:00:00	19	-16.1384	X				2009-06-02 06:00:00	149	20.0463	X
2009-06-02 06:15:00	19	-16.1384	X				2009-06-02 06:15:00	149	20.0463	X
2009-06-02 06:30:00	19	-16.1384	X				2009-06-02 06:30:00	149	20.0463	X
2009-06-02 06:45:00	19	-16.1384	X				2009-06-02 06:45:00	150	20.2101	X
2009-06-02 07:00:00	18	-10.759	-1				2009-06-02 07:00:00	149	20.0463	0
2009-06-02 07:15:00	19	-16.1384	0				2009-06-02 07:15:00	149	20.0463	0
2009-06-02 07:30:00	19	-16.1384	0				2009-06-02 07:30:00	150	20.2101	1
2009-06-02 07:45:00	19	-16.1384	0				2009-06-02 07:45:00	149	20.0463	-1
2009-06-02 08:00:00	20	-21.5179	2				2009-06-02 08:00:00	149	20.0463	0
2009-06-02 08:15:00	18	-10.759	-1				2009-06-02 08:15:00	150	20.2101	1
2009-06-02 08:30:00	20	-21.5179	1				2009-06-02 08:30:00	149	20.0463	-1
2009-06-02 08:45:00	18	-10.759	-1				2009-06-02 08:45:00	148	19.8829	-1
2009-06-02 09:00:00	17	-5.37948	-3				2009-06-02 09:00:00	149	20.0463	0
2009-06-02 09:15:00	19	-16.1384	1				2009-06-02 09:15:00	147	19.7198	-3
2009-06-02 09:30:00	19	-16.1384	-1				2009-06-02 09:30:00	147	19.7198	-2
2009-06-02 09:45:00	18	-10.759	0				2009-06-02 09:45:00	148	19.8829	0
2009-06-02 10:00:00	18	-10.759	1				2009-06-02 10:00:00	149	20.0463	0
2009-06-02 10:15:00	18	-10.759	-1				2009-06-02 10:15:00	147	19.7198	0
2009-06-02 10:30:00	18	-10.759	-1				2009-06-02 10:30:00	148	19.8829	1
2009-06-02 10:45:00	18	-10.759	0				2009-06-02 10:45:00	149	20.0463	1
2009-06-02 11:00:00	17	-5.37948	-1				2009-06-02 11:00:00	150	20.2101	1
2009-06-02 11:15:00	16	0	-2				2009-06-02 11:15:00	150	20.2101	3
2009-06-02 11:30:00	17	-5.37948	-1				2009-06-02 11:30:00	149	20.0463	1
2009-06-02 11:45:00	19	-16.1384	1				2009-06-02 11:45:00	149	20.0463	0
2009-06-02 12:00:00	16	0	X				2009-06-02 12:00:00	150	20.2101	X
2009-06-02 12:15:00	16	0	X				2009-06-02 12:15:00	150	20.2101	X
2009-06-02 12:30:00	16	0	X				2009-06-02 12:30:00	150	20.2101	X
2009-06-02 12:45:00	16	0	X				2009-06-02 12:45:00	150	20.2101	X
2009-06-02 13:00:00	16	0	0				2009-06-02 13:00:00	151	20.3741	1
2009-06-02 13:15:00	16	0	0				2009-06-02 13:15:00	151	20.3741	1
2009-06-02 13:30:00	18	-10.759	2				2009-06-02 13:30:00	150	20.2101	0
2009-06-02 13:45:00	19	-16.1384	3				2009-06-02 13:45:00	151	20.3741	1
2009-06-02 14:00:00	16	0	0				2009-06-02 14:00:00	151	20.3741	0
2009-06-02 14:15:00	16	0	0				2009-06-02 14:15:00	152	20.5385	1
2009-06-02 14:30:00	16	0	-2				2009-06-02 14:30:00	152	20.5385	2
2009-06-02 14:45:00	16	0	-3				2009-06-02 14:45:00	152	20.5385	1
2009-06-02 15:00:00	16	0	0				2009-06-02 15:00:00	152	20.5385	1
2009-06-02 15:15:00	16	0	0				2009-06-02 15:15:00	152	20.5385	0
2009-06-02 15:30:00	17	-5.37948	1				2009-06-02 15:30:00	152	20.5385	0
2009-06-02 15:45:00	16	0	0				2009-06-02 15:45:00	153	20.7033	1
2009-06-02 16:00:00	16	0	0				2009-06-02 16:00:00	153	20.7033	1
2009-06-02 16:15:00	16	0	0				2009-06-02 16:15:00	153	20.7033	1
2009-06-02 16:30:00	16	0	-1				2009-06-02 16:30:00	153	20.7033	1
2009-06-02 16:45:00	17	-5.37948	1				2009-06-02 16:45:00	143	19.0704	-10
2009-06-02 17:00:00	16	0	0				2009-06-02 17:00:00	154	20.8684	1
2009-06-02 17:15:00	26	-53.7948	10				2009-06-02 17:15:00	139	18.4255	-14
2009-06-02 17:30:00	17	-5.37948	1				2009-06-02 17:30:00	152	20.5385	-1
2009-06-02 17:45:00	16	0	-1				2009-06-02 17:45:00	152	20.5385	9
2009-06-02 18:00:00	16	0	X				2009-06-02 18:00:00	151	20.3741	X
2009-06-02 18:15:00	24	-43.0358	X				2009-06-02 18:15:00	114	14.4706	X
2009-06-02 18:30:00	16	0	X				2009-06-02 18:30:00	153	20.7033	X
2009-06-02 18:45:00	17	-5.37948	X				2009-06-02 18:45:00	151	20.3741	X
2009-06-02 19:00:00	18	-10.759	2				2009-06-02 19:00:00	150	20.2101	-1
2009-06-02 19:15:00	17	-5.37948	-7				2009-06-02 19:15:00	145	19.3945	31	19.3945
2009-06-02 19:30:00	16	0	0				2009-06-02 19:30:00	150	20.2101	-3
2009-06-02 19:45:00	17	-5.37948	0				2009-06-02 19:45:00	150	20.2101	-1
2009-06-02 20:00:00	17	-5.37948	-1				2009-06-02 20:00:00	150	20.2101	0
2009-06-02 20:15:00	16	0	-1				2009-06-02 20:15:00	147	19.7198	2
2009-06-02 20:30:00	21	-26.8974	5				2009-06-02 20:30:00	120	15.4107	-30
2009-06-02 20:45:00	21	-26.8974	4				2009-06-02 20:45:00	148	19.8829	-2
2009-06-02 21:00:00	17	-5.37948	0				2009-06-02 21:00:00	149	20.0463	-1
2009-06-02 21:15:00	19	-16.1384	3				2009-06-02 21:15:00	149	20.0463	2
2009-06-02 21:30:00	17	-5.37948	-4				2009-06-02 21:30:00	149	20.0463	29
2009-06-02 21:45:00	16	0	-5				2009-06-02 21:45:00	139	18.4255	-9
2009-06-02 22:00:00	18	-10.759	1				2009-06-02 22:00:00	146	19.557	-3
2009-06-02 22:15:00	17	-5.37948	-2				2009-06-02 22:15:00	148	19.8829	-1
2009-06-02 22:30:00	37	-112.969	20				2009-06-02 22:30:00	117	14.9402	-32		14.9402
2009-06-02 22:45:00	17	-5.37948	1				2009-06-02 22:45:00	136	17.9445	-3
2009-06-02 23:00:00	18	-10.759	0				2009-06-02 23:00:00	136	17.9445	-10
2009-06-02 23:15:00	20	-21.5179	3				2009-06-02 23:15:00	125	16.1977	-23
2009-06-02 23:30:00	20	-21.5179	-17				2009-06-02 23:30:00	129	16.8301	12
2009-06-02 23:45:00	22	-32.2769	5				2009-06-02 23:45:00	129	16.8301	-7
2009-06-03	29	-69.9332	X				2009-06-03	137	18.1046	X
2009-06-03 00:15:00	21	-26.8974	X				2009-06-03 00:15:00	150	20.2101	X
2009-06-03 00:30:00	16	0	X				2009-06-03 00:30:00	152	20.5385	X
2009-06-03 00:45:00	16	0	X				2009-06-03 00:45:00	152	20.5385	X
2009-06-03 01:00:00	17	-5.37948	-12				2009-06-03 01:00:00	152	20.5385	15
2009-06-03 01:15:00	18	-10.759	-3				2009-06-03 01:15:00	151	20.3741	1
2009-06-03 01:30:00	16	0	0				2009-06-03 01:30:00	148	19.8829	-4
2009-06-03 01:45:00	17	-5.37948	1				2009-06-03 01:45:00	141	18.7474	-11
2009-06-03 02:00:00	22	-32.2769	5				2009-06-03 02:00:00	136	17.9445	-16
2009-06-03 02:15:00	16	0	-2				2009-06-03 02:15:00	142	18.9088	-9
2009-06-03 02:30:00	16	0	0				2009-06-03 02:30:00	147	19.7198	-1
2009-06-03 02:45:00	20	-21.5179	3				2009-06-03 02:45:00	151	20.3741	10
2009-06-03 03:00:00	22	-32.2769	0				2009-06-03 03:00:00	139	18.4255	3
2009-06-03 03:15:00	16	0	0				2009-06-03 03:15:00	152	20.5385	10
2009-06-03 03:30:00	16	0	0				2009-06-03 03:30:00	151	20.3741	4
2009-06-03 03:45:00	16	0	-4				2009-06-03 03:45:00	151	20.3741	0
2009-06-03 04:00:00	16	0	-6				2009-06-03 04:00:00	152	20.5385	13
2009-06-03 04:15:00	16	0	0				2009-06-03 04:15:00	152	20.5385	0
2009-06-03 04:30:00	16	0	0				2009-06-03 04:30:00	152	20.5385	1
2009-06-03 04:45:00	20	-21.5179	4				2009-06-03 04:45:00	151	20.3741	0
2009-06-03 05:00:00	17	-5.37948	1				2009-06-03 05:00:00	149	20.0463	-3
2009-06-03 05:15:00	17	-5.37948	1				2009-06-03 05:15:00	151	20.3741	-1
2009-06-03 05:30:00	17	-5.37948	1				2009-06-03 05:30:00	150	20.2101	-2
2009-06-03 05:45:00	16	0	-4				2009-06-03 05:45:00	149	20.0463	-2
2009-06-03 06:00:00	16	0	X				2009-06-03 06:00:00	150	20.2101	X
2009-06-03 06:15:00	16	0	X				2009-06-03 06:15:00	150	20.2101	X
2009-06-03 06:30:00	16	0	X				2009-06-03 06:30:00	150	20.2101	X
2009-06-03 06:45:00	16	0	X				2009-06-03 06:45:00	149	20.0463	X
2009-06-03 07:00:00	16	0	0				2009-06-03 07:00:00	142	18.9088	-8
2009-06-03 07:15:00	17	-5.37948	1				2009-06-03 07:15:00	150	20.2101	0
2009-06-03 07:30:00	17	-5.37948	1				2009-06-03 07:30:00	149	20.0463	-1
2009-06-03 07:45:00	17	-5.37948	1				2009-06-03 07:45:00	150	20.2101	1
2009-06-03 08:00:00	17	-5.37948	1				2009-06-03 08:00:00	149	20.0463	7
2009-06-03 08:15:00	18	-10.759	1				2009-06-03 08:15:00	150	20.2101	0
2009-06-03 08:30:00	18	-10.759	1				2009-06-03 08:30:00	150	20.2101	1
2009-06-03 08:45:00	18	-10.759	1				2009-06-03 08:45:00	149	20.0463	-1
2009-06-03 09:00:00	18	-10.759	1				2009-06-03 09:00:00	147	19.7198	-2
2009-06-03 09:15:00	18	-10.759	0				2009-06-03 09:15:00	149	20.0463	-1
2009-06-03 09:30:00	19	-16.1384	1				2009-06-03 09:30:00	148	19.8829	-2
2009-06-03 09:45:00	17	-5.37948	-1				2009-06-03 09:45:00	149	20.0463	0
2009-06-03 10:00:00	18	-10.759	0				2009-06-03 10:00:00	148	19.8829	1
2009-06-03 10:15:00	18	-10.759	0				2009-06-03 10:15:00	149	20.0463	0
2009-06-03 10:30:00	18	-10.759	-1				2009-06-03 10:30:00	149	20.0463	1
2009-06-03 10:45:00	17	-5.37948	0				2009-06-03 10:45:00	151	20.3741	2
2009-06-03 11:00:00	16	0	-2				2009-06-03 11:00:00	152	20.5385	4
2009-06-03 11:15:00	18	-10.759	0				2009-06-03 11:15:00	151	20.3741	2
2009-06-03 11:30:00	17	-5.37948	-1				2009-06-03 11:30:00	152	20.5385	3
2009-06-03 11:45:00	17	-5.37948	0				2009-06-03 11:45:00	152	20.5385	1
2009-06-03 12:00:00	16	0	X				2009-06-03 12:00:00	151	20.3741	X
2009-06-03 12:15:00	17	-5.37948	X				2009-06-03 12:15:00	153	20.7033	X
2009-06-03 12:30:00	17	-5.37948	X				2009-06-03 12:30:00	154	20.8684	X
2009-06-03 12:45:00	17	-5.37948	X				2009-06-03 12:45:00	155	21.0338	X
2009-06-03 13:00:00	16	0	0				2009-06-03 13:00:00	154	20.8684	3
2009-06-03 13:15:00	17	-5.37948	0				2009-06-03 13:15:00	154	20.8684	1
2009-06-03 13:30:00	16	0	-1				2009-06-03 13:30:00	156	21.1996	2
2009-06-03 13:45:00	16	0	-1				2009-06-03 13:45:00	156	21.1996	1
2009-06-03 14:00:00	16	0	0				2009-06-03 14:00:00	156	21.1996	2
2009-06-03 14:15:00	17	-5.37948	0				2009-06-03 14:15:00	155	21.0338	1
2009-06-03 14:30:00	47	-166.764	31	-166.764			2009-06-03 14:30:00	124	16.04	-32		16.04
2009-06-03 14:45:00	47	-166.764	31	-166.764			2009-06-03 14:45:00	124	16.04	-32		16.04
2009-06-03 15:00:00	16	0	0				2009-06-03 15:00:00	152	20.5385	-4
2009-06-03 15:15:00	16	0	-1				2009-06-03 15:15:00	152	20.5385	-3
2009-06-03 15:30:00	18	-10.759	-29				2009-06-03 15:30:00	151	20.3741	27
2009-06-03 15:45:00	16	0	-31				2009-06-03 15:45:00	148	19.8829	24
2009-06-03 16:00:00	16	0	0				2009-06-03 16:00:00	153	20.7033	1
2009-06-03 16:15:00	16	0	0				2009-06-03 16:15:00	154	20.8684	2
2009-06-03 16:30:00	16	0	-2				2009-06-03 16:30:00	154	20.8684	3
2009-06-03 16:45:00	16	0	0				2009-06-03 16:45:00	155	21.0338	7
2009-06-03 17:00:00	17	-5.37948	1				2009-06-03 17:00:00	155	21.0338	2
2009-06-03 17:15:00	16	0	0				2009-06-03 17:15:00	152	20.5385	-2
2009-06-03 17:30:00	16	0	0				2009-06-03 17:30:00	155	21.0338	1
2009-06-03 17:45:00	18	-10.759	2				2009-06-03 17:45:00	153	20.7033	-2
2009-06-03 18:00:00	16	0	X				2009-06-03 18:00:00	152	20.5385	X
2009-06-03 18:15:00	16	0	X				2009-06-03 18:15:00	151	20.3741	X
2009-06-03 18:30:00	18	-10.759	X				2009-06-03 18:30:00	149	20.0463	X
2009-06-03 18:45:00	16	0	X				2009-06-03 18:45:00	153	20.7033	X
2009-06-03 19:00:00	16	0	0				2009-06-03 19:00:00	154	20.8684	2
2009-06-03 19:15:00	16	0	0				2009-06-03 19:15:00	150	20.2101	-1
2009-06-03 19:30:00	16	0	-2				2009-06-03 19:30:00	154	20.8684	5
2009-06-03 19:45:00	16	0	0				2009-06-03 19:45:00	155	21.0338	2
2009-06-03 20:00:00	16	0	0				2009-06-03 20:00:00	154	20.8684	0
2009-06-03 20:15:00	16	0	0				2009-06-03 20:15:00	155	21.0338	5
2009-06-03 20:30:00	16	0	0				2009-06-03 20:30:00	155	21.0338	1
2009-06-03 20:45:00	16	0	0				2009-06-03 20:45:00	154	20.8684	-1
2009-06-03 21:00:00	16	0	0				2009-06-03 21:00:00	149	20.0463	-5
2009-06-03 21:15:00	16	0	0				2009-06-03 21:15:00	154	20.8684	-1
2009-06-03 21:30:00	16	0	0				2009-06-03 21:30:00	158	21.5323	3
2009-06-03 21:45:00	16	0	0				2009-06-03 21:45:00	158	21.5323	4
2009-06-03 22:00:00	16	0	0				2009-06-03 22:00:00	158	21.5323	9
2009-06-03 22:15:00	16	0	0				2009-06-03 22:15:00	160	21.8665	6
2009-06-03 22:30:00	16	0	0				2009-06-03 22:30:00	161	22.0342	3
2009-06-03 22:45:00	16	0	0				2009-06-03 22:45:00	161	22.0342	3
2009-06-03 23:00:00	16	0	0				2009-06-03 23:00:00	158	21.5323	0
2009-06-03 23:15:00	16	0	0				2009-06-03 23:15:00	162	22.2023	2
2009-06-03 23:30:00	16	0	0				2009-06-03 23:30:00	162	22.2023	1
2009-06-03 23:45:00	17	-5.37948	1				2009-06-03 23:45:00	161	22.0342	0
2009-06-04	17	-5.37948	X				2009-06-04	160	21.8665	X
2009-06-04 00:15:00	16	0	X				2009-06-04 00:15:00	158	21.5323	X
2009-06-04 00:30:00	16	0	X				2009-06-04 00:30:00	161	22.0342	X
2009-06-04 00:45:00	17	-5.37948	X				2009-06-04 00:45:00	159	21.6992	X
2009-06-04 01:00:00	22	-32.2769	5				2009-06-04 01:00:00	128	16.6718	-32		16.6718
2009-06-04 01:15:00	17	-5.37948	1				2009-06-04 01:15:00	160	21.8665	2
2009-06-04 01:30:00	17	-5.37948	1				2009-06-04 01:30:00	160	21.8665	-1
2009-06-04 01:45:00	28	-64.5538	11				2009-06-04 01:45:00	127	16.5136	-32		16.5136
2009-06-04 02:00:00	16	0	-6				2009-06-04 02:00:00	159	21.6992	31	21.6992
2009-06-04 02:15:00	16	0	-1				2009-06-04 02:15:00	155	21.0338	-5
2009-06-04 02:30:00	17	-5.37948	0				2009-06-04 02:30:00	156	21.1996	-4
2009-06-04 02:45:00	16	0	-12				2009-06-04 02:45:00	158	21.5323	31	21.5323
2009-06-04 03:00:00	17	-5.37948	1				2009-06-04 03:00:00	157	21.3657	-2
2009-06-04 03:15:00	16	0	0				2009-06-04 03:15:00	160	21.8665	5
2009-06-04 03:30:00	16	0	-1				2009-06-04 03:30:00	156	21.1996	0
2009-06-04 03:45:00	16	0	0				2009-06-04 03:45:00	159	21.6992	1
2009-06-04 04:00:00	16	0	-1				2009-06-04 04:00:00	157	21.3657	0
2009-06-04 04:15:00	17	-5.37948	1				2009-06-04 04:15:00	159	21.6992	-1
2009-06-04 04:30:00	18	-10.759	2				2009-06-04 04:30:00	158	21.5323	2
2009-06-04 04:45:00	16	0	0				2009-06-04 04:45:00	159	21.6992	0
2009-06-04 05:00:00	16	0	0				2009-06-04 05:00:00	158	21.5323	1
2009-06-04 05:15:00	17	-5.37948	0				2009-06-04 05:15:00	159	21.6992	0
2009-06-04 05:30:00	16	0	-2				2009-06-04 05:30:00	158	21.5323	0
2009-06-04 05:45:00	17	-5.37948	1				2009-06-04 05:45:00	158	21.5323	-1
2009-06-04 06:00:00	16	0	X				2009-06-04 06:00:00	158	21.5323	X
2009-06-04 06:15:00	17	-5.37948	X				2009-06-04 06:15:00	157	21.3657	X
2009-06-04 06:30:00	18	-10.759	X				2009-06-04 06:30:00	158	21.5323	X
2009-06-04 06:45:00	17	-5.37948	X				2009-06-04 06:45:00	158	21.5323	X
2009-06-04 07:00:00	18	-10.759	2				2009-06-04 07:00:00	158	21.5323	0
2009-06-04 07:15:00	16	0	-1				2009-06-04 07:15:00	157	21.3657	0
2009-06-04 07:30:00	16	0	-2				2009-06-04 07:30:00	158	21.5323	0
2009-06-04 07:45:00	16	0	-1				2009-06-04 07:45:00	158	21.5323	0
2009-06-04 08:00:00	16	0	-2				2009-06-04 08:00:00	157	21.3657	-1
2009-06-04 08:15:00	17	-5.37948	1				2009-06-04 08:15:00	158	21.5323	1
2009-06-04 08:30:00	17	-5.37948	1				2009-06-04 08:30:00	158	21.5323	0
2009-06-04 08:45:00	17	-5.37948	1				2009-06-04 08:45:00	157	21.3657	-1
2009-06-04 09:00:00	17	-5.37948	1				2009-06-04 09:00:00	157	21.3657	0
2009-06-04 09:15:00	17	-5.37948	0				2009-06-04 09:15:00	157	21.3657	-1
2009-06-04 09:30:00	16	0	-1				2009-06-04 09:30:00	157	21.3657	-1
2009-06-04 09:45:00	17	-5.37948	0				2009-06-04 09:45:00	157	21.3657	0
2009-06-04 10:00:00	16	0	-1				2009-06-04 10:00:00	157	21.3657	0
2009-06-04 10:15:00	16	0	-1				2009-06-04 10:15:00	157	21.3657	0
2009-06-04 10:30:00	16	0	0				2009-06-04 10:30:00	157	21.3657	0
2009-06-04 10:45:00	16	0	-1				2009-06-04 10:45:00	157	21.3657	0
2009-06-04 11:00:00	17	-5.37948	1				2009-06-04 11:00:00	157	21.3657	0
2009-06-04 11:15:00	16	0	0				2009-06-04 11:15:00	157	21.3657	0
2009-06-04 11:30:00	17	-5.37948	1				2009-06-04 11:30:00	157	21.3657	0
2009-06-04 11:45:00	17	-5.37948	1				2009-06-04 11:45:00	157	21.3657	0
2009-06-04 12:00:00	19	-16.1384	X				2009-06-04 12:00:00	156	21.1996	X
2009-06-04 12:15:00	17	-5.37948	X				2009-06-04 12:15:00	157	21.3657	X
2009-06-04 12:30:00	18	-10.759	X				2009-06-04 12:30:00	157	21.3657	X
2009-06-04 12:45:00	16	0	X				2009-06-04 12:45:00	157	21.3657	X
2009-06-04 13:00:00	16	0	-3				2009-06-04 13:00:00	155	21.0338	-1
2009-06-04 13:15:00	16	0	-1				2009-06-04 13:15:00	158	21.5323	1
2009-06-04 13:30:00	16	0	-2				2009-06-04 13:30:00	157	21.3657	0
2009-06-04 13:45:00	17	-5.37948	1				2009-06-04 13:45:00	158	21.5323	1
2009-06-04 14:00:00	17	-5.37948	1				2009-06-04 14:00:00	158	21.5323	3
2009-06-04 14:15:00	17	-5.37948	1				2009-06-04 14:15:00	158	21.5323	0
2009-06-04 14:30:00	17	-5.37948	1				2009-06-04 14:30:00	158	21.5323	1
2009-06-04 14:45:00	17	-5.37948	0				2009-06-04 14:45:00	157	21.3657	-1
2009-06-04 15:00:00	17	-5.37948	0				2009-06-04 15:00:00	157	21.3657	-1
2009-06-04 15:15:00	17	-5.37948	0				2009-06-04 15:15:00	157	21.3657	-1
2009-06-04 15:30:00	17	-5.37948	0				2009-06-04 15:30:00	157	21.3657	-1
2009-06-04 15:45:00	16	0	-1				2009-06-04 15:45:00	157	21.3657	0
2009-06-04 16:00:00	16	0	-1				2009-06-04 16:00:00	157	21.3657	0
2009-06-04 16:15:00	16	0	-1				2009-06-04 16:15:00	157	21.3657	0
2009-06-04 16:30:00	16	0	-1				2009-06-04 16:30:00	158	21.5323	1
2009-06-04 16:45:00	16	0	0				2009-06-04 16:45:00	157	21.3657	0
2009-06-04 17:00:00	16	0	0				2009-06-04 17:00:00	157	21.3657	0
2009-06-04 17:15:00	16	0	0				2009-06-04 17:15:00	156	21.1996	-1
2009-06-04 17:30:00	16	0	0				2009-06-04 17:30:00	157	21.3657	-1
2009-06-04 17:45:00	17	-5.37948	1				2009-06-04 17:45:00	158	21.5323	1
2009-06-04 18:00:00	17	-5.37948	X				2009-06-04 18:00:00	158	21.5323	X
2009-06-04 18:15:00	16	0	X				2009-06-04 18:15:00	158	21.5323	X
2009-06-04 18:30:00	16	0	X				2009-06-04 18:30:00	159	21.6992	X
2009-06-04 18:45:00	16	0	X				2009-06-04 18:45:00	159	21.6992	X
2009-06-04 19:00:00	16	0	-1				2009-06-04 19:00:00	159	21.6992	1
2009-06-04 19:15:00	16	0	0				2009-06-04 19:15:00	157	21.3657	-1
2009-06-04 19:30:00	16	0	0				2009-06-04 19:30:00	160	21.8665	1
2009-06-04 19:45:00	17	-5.37948	1				2009-06-04 19:45:00	160	21.8665	1
2009-06-04 20:00:00	18	-10.759	2				2009-06-04 20:00:00	161	22.0342	2
2009-06-04 20:15:00	17	-5.37948	1				2009-06-04 20:15:00	146	19.557	-11
2009-06-04 20:30:00	16	0	0				2009-06-04 20:30:00	156	21.1996	-4
2009-06-04 20:45:00	17	-5.37948	0				2009-06-04 20:45:00	161	22.0342	1
2009-06-04 21:00:00	17	-5.37948	-1				2009-06-04 21:00:00	156	21.1996	-5
2009-06-04 21:15:00	16	0	-1				2009-06-04 21:15:00	159	21.6992	13
2009-06-04 21:30:00	17	-5.37948	1				2009-06-04 21:30:00	159	21.6992	3
2009-06-04 21:45:00	18	-10.759	1				2009-06-04 21:45:00	158	21.5323	-3
2009-06-04 22:00:00	17	-5.37948	0				2009-06-04 22:00:00	159	21.6992	3
2009-06-04 22:15:00	18	-10.759	2				2009-06-04 22:15:00	156	21.1996	-3
2009-06-04 22:30:00	16	0	-1				2009-06-04 22:30:00	161	22.0342	2
2009-06-04 22:45:00	29	-69.9332	11				2009-06-04 22:45:00	144	19.2323	-14
2009-06-04 23:00:00	16	0	-1				2009-06-04 23:00:00	162	22.2023	3
2009-06-04 23:15:00	17	-5.37948	-1				2009-06-04 23:15:00	162	22.2023	6
2009-06-04 23:30:00	19	-16.1384	3				2009-06-04 23:30:00	130	16.9887	-31
2009-06-04 23:45:00	17	-5.37948	-12				2009-06-04 23:45:00	161	22.0342	17
2009-06-05	16	0	X				2009-06-05	159	21.6992	X
2009-06-05 00:15:00	17	-5.37948	X				2009-06-05 00:15:00	162	22.2023	X
2009-06-05 00:30:00	16	0	X				2009-06-05 00:30:00	161	22.0342	X
2009-06-05 00:45:00	18	-10.759	X				2009-06-05 00:45:00	132	17.3065	X
2009-06-05 01:00:00	21	-26.8974	5				2009-06-05 01:00:00	159	21.6992	0
2009-06-05 01:15:00	21	-26.8974	4				2009-06-05 01:15:00	151	20.3741	-11
2009-06-05 01:30:00	16	0	0				2009-06-05 01:30:00	160	21.8665	-1
2009-06-05 01:45:00	19	-16.1384	1				2009-06-05 01:45:00	151	20.3741	19
2009-06-05 02:00:00	17	-5.37948	-4				2009-06-05 02:00:00	161	22.0342	2
2009-06-05 02:15:00	19	-16.1384	-2				2009-06-05 02:15:00	156	21.1996	5
2009-06-05 02:30:00	16	0	0				2009-06-05 02:30:00	163	22.3708	3
2009-06-05 02:45:00	16	0	-3				2009-06-05 02:45:00	162	22.2023	11
2009-06-05 03:00:00	20	-21.5179	3				2009-06-05 03:00:00	152	20.5385	-9
2009-06-05 03:15:00	20	-21.5179	1				2009-06-05 03:15:00	148	19.8829	-8
2009-06-05 03:30:00	18	-10.759	2				2009-06-05 03:30:00	149	20.0463	-14
2009-06-05 03:45:00	19	-16.1384	3				2009-06-05 03:45:00	154	20.8684	-8
2009-06-05 04:00:00	19	-16.1384	-1				2009-06-05 04:00:00	159	21.6992	7
2009-06-05 04:15:00	16	0	-4				2009-06-05 04:15:00	160	21.8665	12
2009-06-05 04:30:00	19	-16.1384	1				2009-06-05 04:30:00	151	20.3741	2
2009-06-05 04:45:00	17	-5.37948	-2				2009-06-05 04:45:00	160	21.8665	6
2009-06-05 05:00:00	16	0	-3				2009-06-05 05:00:00	160	21.8665	1
2009-06-05 05:15:00	17	-5.37948	1				2009-06-05 05:15:00	162	22.2023	2
2009-06-05 05:30:00	17	-5.37948	-2				2009-06-05 05:30:00	162	22.2023	11
2009-06-05 05:45:00	17	-5.37948	0				2009-06-05 05:45:00	162	22.2023	2
2009-06-05 06:00:00	19	-16.1384	X				2009-06-05 06:00:00	160	21.8665	X
2009-06-05 06:15:00	16	0	X				2009-06-05 06:15:00	160	21.8665	X
2009-06-05 06:30:00	16	0	X				2009-06-05 06:30:00	142	18.9088	X
2009-06-05 06:45:00	16	0	X				2009-06-05 06:45:00	160	21.8665	X
2009-06-05 07:00:00	16	0	-3				2009-06-05 07:00:00	154	20.8684	-6
2009-06-05 07:15:00	18	-10.759	2				2009-06-05 07:15:00	153	20.7033	-7
2009-06-05 07:30:00	17	-5.37948	1				2009-06-05 07:30:00	161	22.0342	19
2009-06-05 07:45:00	19	-16.1384	3				2009-06-05 07:45:00	146	19.557	-14
2009-06-05 08:00:00	16	0	0				2009-06-05 08:00:00	152	20.5385	-2
2009-06-05 08:15:00	19	-16.1384	1				2009-06-05 08:15:00	151	20.3741	-2
2009-06-05 08:30:00	18	-10.759	1				2009-06-05 08:30:00	154	20.8684	-7
2009-06-05 08:45:00	19	-16.1384	0				2009-06-05 08:45:00	147	19.7198	1
2009-06-05 09:00:00	20	-21.5179	4				2009-06-05 09:00:00	149	20.0463	-3
2009-06-05 09:15:00	17	-5.37948	-2				2009-06-05 09:15:00	160	21.8665	9
2009-06-05 09:30:00	18	-10.759	0				2009-06-05 09:30:00	152	20.5385	-2
2009-06-05 09:45:00	18	-10.759	-1				2009-06-05 09:45:00	160	21.8665	13
2009-06-05 10:00:00	19	-16.1384	-1				2009-06-05 10:00:00	152	20.5385	3
2009-06-05 10:15:00	18	-10.759	1				2009-06-05 10:15:00	152	20.5385	-8
2009-06-05 10:30:00	20	-21.5179	2				2009-06-05 10:30:00	143	19.0704	-9
2009-06-05 10:45:00	17	-5.37948	-1				2009-06-05 10:45:00	150	20.2101	-10
2009-06-05 11:00:00	17	-5.37948	-2				2009-06-05 11:00:00	160	21.8665	8
2009-06-05 11:15:00	18	-10.759	0				2009-06-05 11:15:00	160	21.8665	8
2009-06-05 11:30:00	17	-5.37948	-3				2009-06-05 11:30:00	160	21.8665	17
2009-06-05 11:45:00	20	-21.5179	3				2009-06-05 11:45:00	157	21.3657	7
2009-06-05 12:00:00	20	-21.5179	X				2009-06-05 12:00:00	145	19.3945	X
2009-06-05 12:15:00	17	-5.37948	X				2009-06-05 12:15:00	161	22.0342	X
2009-06-05 12:30:00	18	-10.759	X				2009-06-05 12:30:00	161	22.0342	X
2009-06-05 12:45:00	17	-5.37948	X				2009-06-05 12:45:00	160	21.8665	X
2009-06-05 13:00:00	16	0	-4				2009-06-05 13:00:00	161	22.0342	16
2009-06-05 13:15:00	17	-5.37948	0				2009-06-05 13:15:00	160	21.8665	-1
2009-06-05 13:30:00	17	-5.37948	-1				2009-06-05 13:30:00	160	21.8665	-1
2009-06-05 13:45:00	18	-10.759	1				2009-06-05 13:45:00	161	22.0342	1
2009-06-05 14:00:00	21	-26.8974	5				2009-06-05 14:00:00	159	21.6992	-2
2009-06-05 14:15:00	18	-10.759	1				2009-06-05 14:15:00	161	22.0342	1
2009-06-05 14:30:00	20	-21.5179	3				2009-06-05 14:30:00	155	21.0338	-5
2009-06-05 14:45:00	18	-10.759	0				2009-06-05 14:45:00	161	22.0342	0
2009-06-05 15:00:00	18	-10.759	-3				2009-06-05 15:00:00	160	21.8665	1
2009-06-05 15:15:00	19	-16.1384	1				2009-06-05 15:15:00	159	21.6992	-2
2009-06-05 15:30:00	19	-16.1384	-1				2009-06-05 15:30:00	158	21.5323	3
2009-06-05 15:45:00	17	-5.37948	-1				2009-06-05 15:45:00	160	21.8665	-1
2009-06-05 16:00:00	17	-5.37948	-1				2009-06-05 16:00:00	160	21.8665	0
2009-06-05 16:15:00	19	-16.1384	0				2009-06-05 16:15:00	159	21.6992	0
2009-06-05 16:30:00	17	-5.37948	-2				2009-06-05 16:30:00	160	21.8665	2
2009-06-05 16:45:00	18	-10.759	1				2009-06-05 16:45:00	158	21.5323	-2
2009-06-05 17:00:00	18	-10.759	1				2009-06-05 17:00:00	159	21.6992	-1
2009-06-05 17:15:00	18	-10.759	-1				2009-06-05 17:15:00	159	21.6992	0
2009-06-05 17:30:00	18	-10.759	1				2009-06-05 17:30:00	158	21.5323	-2
2009-06-05 17:45:00	16	0	-2				2009-06-05 17:45:00	160	21.8665	2
2009-06-05 18:00:00	17	-5.37948	X				2009-06-05 18:00:00	161	22.0342	X
2009-06-05 18:15:00	16	0	X				2009-06-05 18:15:00	161	22.0342	X
2009-06-05 18:30:00	17	-5.37948	X				2009-06-05 18:30:00	161	22.0342	X
2009-06-05 18:45:00	17	-5.37948	X				2009-06-05 18:45:00	161	22.0342	X
2009-06-05 19:00:00	26	-53.7948	9				2009-06-05 19:00:00	147	19.7198	-14
2009-06-05 19:15:00	17	-5.37948	1				2009-06-05 19:15:00	162	22.2023	1
2009-06-05 19:30:00	18	-10.759	1				2009-06-05 19:30:00	133	17.4656	-28
2009-06-05 19:45:00	18	-10.759	1				2009-06-05 19:45:00	161	22.0342	0
2009-06-05 20:00:00	17	-5.37948	-9				2009-06-05 20:00:00	158	21.5323	11
2009-06-05 20:15:00	17	-5.37948	0				2009-06-05 20:15:00	162	22.2023	0
2009-06-05 20:30:00	19	-16.1384	1				2009-06-05 20:30:00	162	22.2023	29
2009-06-05 20:45:00	21	-26.8974	3				2009-06-05 20:45:00	129	16.8301	-32		16.8301
2009-06-05 21:00:00	17	-5.37948	0				2009-06-05 21:00:00	162	22.2023	4
2009-06-05 21:15:00	18	-10.759	1				2009-06-05 21:15:00	162	22.2023	0
2009-06-05 21:30:00	17	-5.37948	-2				2009-06-05 21:30:00	162	22.2023	0
2009-06-05 21:45:00	16	0	-5				2009-06-05 21:45:00	160	21.8665	31	21.8665
2009-06-05 22:00:00	17	-5.37948	0				2009-06-05 22:00:00	161	22.0342	-1
2009-06-05 22:15:00	17	-5.37948	-1				2009-06-05 22:15:00	162	22.2023	0
2009-06-05 22:30:00	17	-5.37948	0				2009-06-05 22:30:00	149	20.0463	-13
2009-06-05 22:45:00	17	-5.37948	1				2009-06-05 22:45:00	161	22.0342	1
2009-06-05 23:00:00	17	-5.37948	0				2009-06-05 23:00:00	161	22.0342	0
2009-06-05 23:15:00	24	-43.0358	7				2009-06-05 23:15:00	154	20.8684	-8
2009-06-05 23:30:00	17	-5.37948	0				2009-06-05 23:30:00	162	22.2023	13
2009-06-05 23:45:00	24	-43.0358	7				2009-06-05 23:45:00	133	17.4656	-28
2009-06-06	22	-32.2769	X				2009-06-06	159	21.6992	X
2009-06-06 00:15:00	28	-64.5538	X				2009-06-06 00:15:00	142	18.9088	X
2009-06-06 00:30:00	26	-53.7948	X				2009-06-06 00:30:00	132	17.3065	X
2009-06-06 00:45:00	18	-10.759	X				2009-06-06 00:45:00	140	18.5863	X
2009-06-06 01:00:00	18	-10.759	-4				2009-06-06 01:00:00	159	21.6992	0
2009-06-06 01:15:00	18	-10.759	-10				2009-06-06 01:15:00	160	21.8665	18
2009-06-06 01:30:00	20	-21.5179	-6				2009-06-06 01:30:00	161	22.0342	29
2009-06-06 01:45:00	19	-16.1384	1				2009-06-06 01:45:00	156	21.1996	16
2009-06-06 02:00:00	17	-5.37948	-1				2009-06-06 02:00:00	158	21.5323	-1
2009-06-06 02:15:00	17	-5.37948	-1				2009-06-06 02:15:00	152	20.5385	-8
2009-06-06 02:30:00	17	-5.37948	-3				2009-06-06 02:30:00	161	22.0342	0
2009-06-06 02:45:00	18	-10.759	-1				2009-06-06 02:45:00	161	22.0342	5
2009-06-06 03:00:00	19	-16.1384	2				2009-06-06 03:00:00	159	21.6992	1
2009-06-06 03:15:00	19	-16.1384	2				2009-06-06 03:15:00	158	21.5323	6
2009-06-06 03:30:00	18	-10.759	1				2009-06-06 03:30:00	157	21.3657	-4
2009-06-06 03:45:00	18	-10.759	0				2009-06-06 03:45:00	154	20.8684	-7
2009-06-06 04:00:00	17	-5.37948	-2				2009-06-06 04:00:00	161	22.0342	2
2009-06-06 04:15:00	17	-5.37948	-2				2009-06-06 04:15:00	161	22.0342	3
2009-06-06 04:30:00	17	-5.37948	-1				2009-06-06 04:30:00	161	22.0342	4
2009-06-06 04:45:00	16	0	-2				2009-06-06 04:45:00	161	22.0342	7
2009-06-06 05:00:00	17	-5.37948	0				2009-06-06 05:00:00	161	22.0342	0
2009-06-06 05:15:00	16	0	-1				2009-06-06 05:15:00	161	22.0342	0
2009-06-06 05:30:00	16	0	-1				2009-06-06 05:30:00	161	22.0342	0
2009-06-06 05:45:00	18	-10.759	2				2009-06-06 05:45:00	160	21.8665	-1
2009-06-06 06:00:00	17	-5.37948	X				2009-06-06 06:00:00	161	22.0342	X
2009-06-06 06:15:00	17	-5.37948	X				2009-06-06 06:15:00	161	22.0342	X
2009-06-06 06:30:00	20	-21.5179	X				2009-06-06 06:30:00	161	22.0342	X
2009-06-06 06:45:00	18	-10.759	X				2009-06-06 06:45:00	158	21.5323	X
2009-06-06 07:00:00	17	-5.37948	0				2009-06-06 07:00:00	161	22.0342	0
2009-06-06 07:15:00	18	-10.759	1				2009-06-06 07:15:00	161	22.0342	0
2009-06-06 07:30:00	17	-5.37948	-3				2009-06-06 07:30:00	161	22.0342	0
2009-06-06 07:45:00	18	-10.759	0				2009-06-06 07:45:00	161	22.0342	3
2009-06-06 08:00:00	16	0	-1				2009-06-06 08:00:00	158	21.5323	-3
2009-06-06 08:15:00	18	-10.759	0				2009-06-06 08:15:00	161	22.0342	0
2009-06-06 08:30:00	17	-5.37948	0				2009-06-06 08:30:00	161	22.0342	0
2009-06-06 08:45:00	17	-5.37948	-1				2009-06-06 08:45:00	161	22.0342	0
2009-06-06 09:00:00	17	-5.37948	1				2009-06-06 09:00:00	161	22.0342	3
2009-06-06 09:15:00	21	-26.8974	3				2009-06-06 09:15:00	157	21.3657	-4
2009-06-06 09:30:00	18	-10.759	1				2009-06-06 09:30:00	156	21.1996	-5
2009-06-06 09:45:00	19	-16.1384	2				2009-06-06 09:45:00	159	21.6992	-2
2009-06-06 10:00:00	18	-10.759	1				2009-06-06 10:00:00	156	21.1996	-5
2009-06-06 10:15:00	18	-10.759	-3				2009-06-06 10:15:00	156	21.1996	-1
2009-06-06 10:30:00	19	-16.1384	1				2009-06-06 10:30:00	156	21.1996	0
2009-06-06 10:45:00	20	-21.5179	1				2009-06-06 10:45:00	159	21.6992	0
2009-06-06 11:00:00	18	-10.759	0				2009-06-06 11:00:00	157	21.3657	1
2009-06-06 11:15:00	19	-16.1384	1				2009-06-06 11:15:00	153	20.7033	-3
2009-06-06 11:30:00	19	-16.1384	0				2009-06-06 11:30:00	156	21.1996	0
2009-06-06 11:45:00	19	-16.1384	-1				2009-06-06 11:45:00	155	21.0338	-4
2009-06-06 12:00:00	19	-16.1384	X				2009-06-06 12:00:00	158	21.5323	X
2009-06-06 12:15:00	16	0	X				2009-06-06 12:15:00	160	21.8665	X
2009-06-06 12:30:00	19	-16.1384	X				2009-06-06 12:30:00	160	21.8665	X
2009-06-06 12:45:00	17	-5.37948	X				2009-06-06 12:45:00	161	22.0342	X
2009-06-06 13:00:00	18	-10.759	-1				2009-06-06 13:00:00	161	22.0342	3
2009-06-06 13:15:00	17	-5.37948	1				2009-06-06 13:15:00	159	21.6992	-1
2009-06-06 13:30:00	16	0	-3				2009-06-06 13:30:00	160	21.8665	0
2009-06-06 13:45:00	17	-5.37948	0				2009-06-06 13:45:00	160	21.8665	-1
2009-06-06 14:00:00	18	-10.759	0				2009-06-06 14:00:00	159	21.6992	-2
2009-06-06 14:15:00	17	-5.37948	0				2009-06-06 14:15:00	161	22.0342	2
2009-06-06 14:30:00	16	0	0				2009-06-06 14:30:00	160	21.8665	0
2009-06-06 14:45:00	16	0	-1				2009-06-06 14:45:00	160	21.8665	0
2009-06-06 15:00:00	17	-5.37948	-1				2009-06-06 15:00:00	160	21.8665	1
2009-06-06 15:15:00	17	-5.37948	0				2009-06-06 15:15:00	160	21.8665	-1
2009-06-06 15:30:00	16	0	0				2009-06-06 15:30:00	161	22.0342	1
2009-06-06 15:45:00	18	-10.759	2				2009-06-06 15:45:00	161	22.0342	1
2009-06-06 16:00:00	17	-5.37948	0				2009-06-06 16:00:00	160	21.8665	0
2009-06-06 16:15:00	17	-5.37948	0				2009-06-06 16:15:00	160	21.8665	0
2009-06-06 16:30:00	16	0	0				2009-06-06 16:30:00	158	21.5323	-3
2009-06-06 16:45:00	17	-5.37948	-1				2009-06-06 16:45:00	161	22.0342	0
2009-06-06 17:00:00	21	-26.8974	4				2009-06-06 17:00:00	157	21.3657	-3
2009-06-06 17:15:00	16	0	-1				2009-06-06 17:15:00	161	22.0342	1
2009-06-06 17:30:00	16	0	0				2009-06-06 17:30:00	161	22.0342	3
2009-06-06 17:45:00	17	-5.37948	0				2009-06-06 17:45:00	161	22.0342	0
2009-06-06 18:00:00	17	-5.37948	X				2009-06-06 18:00:00	161	22.0342	X
2009-06-06 18:15:00	17	-5.37948	X				2009-06-06 18:15:00	161	22.0342	X
2009-06-06 18:30:00	24	-43.0358	X				2009-06-06 18:30:00	147	19.7198	X
2009-06-06 18:45:00	16	0	X				2009-06-06 18:45:00	161	22.0342	X
2009-06-06 19:00:00	16	0	-1				2009-06-06 19:00:00	161	22.0342	0
2009-06-06 19:15:00	16	0	-1				2009-06-06 19:15:00	153	20.7033	-8
2009-06-06 19:30:00	16	0	-8				2009-06-06 19:30:00	160	21.8665	13
2009-06-06 19:45:00	16	0	0				2009-06-06 19:45:00	162	22.2023	1
2009-06-06 20:00:00	17	-5.37948	1				2009-06-06 20:00:00	160	21.8665	-1
2009-06-06 20:15:00	16	0	0				2009-06-06 20:15:00	162	22.2023	9
2009-06-06 20:30:00	16	0	0				2009-06-06 20:30:00	162	22.2023	2
2009-06-06 20:45:00	16	0	0				2009-06-06 20:45:00	159	21.6992	-3
2009-06-06 21:00:00	16	0	-1				2009-06-06 21:00:00	163	22.3708	3
2009-06-06 21:15:00	20	-21.5179	4				2009-06-06 21:15:00	133	17.4656	-29
2009-06-06 21:30:00	16	0	0				2009-06-06 21:30:00	163	22.3708	1
2009-06-06 21:45:00	17	-5.37948	1				2009-06-06 21:45:00	163	22.3708	4
2009-06-06 22:00:00	16	0	0				2009-06-06 22:00:00	162	22.2023	-1
2009-06-06 22:15:00	16	0	-4				2009-06-06 22:15:00	162	22.2023	29
2009-06-06 22:30:00	16	0	0				2009-06-06 22:30:00	163	22.3708	0
2009-06-06 22:45:00	20	-21.5179	3				2009-06-06 22:45:00	131	17.1475	-32		17.1475
2009-06-06 23:00:00	17	-5.37948	1				2009-06-06 23:00:00	162	22.2023	0
2009-06-06 23:15:00	17	-5.37948	1				2009-06-06 23:15:00	162	22.2023	0
2009-06-06 23:30:00	17	-5.37948	1				2009-06-06 23:30:00	161	22.0342	-2
2009-06-06 23:45:00	17	-5.37948	-3				2009-06-06 23:45:00	154	20.8684	23
2009-06-07	18	-10.759	X				2009-06-07	162	22.2023	X
2009-06-07 00:15:00	17	-5.37948	X				2009-06-07 00:15:00	162	22.2023	X
2009-06-07 00:30:00	17	-5.37948	X				2009-06-07 00:30:00	162	22.2023	X
2009-06-07 00:45:00	17	-5.37948	X				2009-06-07 00:45:00	157	21.3657	X
2009-06-07 01:00:00	17	-5.37948	-1				2009-06-07 01:00:00	162	22.2023	0
2009-06-07 01:15:00	16	0	-1				2009-06-07 01:15:00	161	22.0342	-1
2009-06-07 01:30:00	17	-5.37948	0				2009-06-07 01:30:00	156	21.1996	-6
2009-06-07 01:45:00	17	-5.37948	0				2009-06-07 01:45:00	160	21.8665	3
2009-06-07 02:00:00	18	-10.759	1				2009-06-07 02:00:00	144	19.2323	-18
2009-06-07 02:15:00	17	-5.37948	1				2009-06-07 02:15:00	152	20.5385	-9
2009-06-07 02:30:00	17	-5.37948	0				2009-06-07 02:30:00	160	21.8665	4
2009-06-07 02:45:00	16	0	-1				2009-06-07 02:45:00	161	22.0342	1
2009-06-07 03:00:00	17	-5.37948	-1				2009-06-07 03:00:00	159	21.6992	15
2009-06-07 03:15:00	16	0	-1				2009-06-07 03:15:00	161	22.0342	9
2009-06-07 03:30:00	16	0	-1				2009-06-07 03:30:00	161	22.0342	1
2009-06-07 03:45:00	18	-10.759	2				2009-06-07 03:45:00	158	21.5323	-3
2009-06-07 04:00:00	18	-10.759	1				2009-06-07 04:00:00	157	21.3657	-2
2009-06-07 04:15:00	16	0	0				2009-06-07 04:15:00	161	22.0342	0
2009-06-07 04:30:00	16	0	0				2009-06-07 04:30:00	161	22.0342	0
2009-06-07 04:45:00	16	0	-2				2009-06-07 04:45:00	161	22.0342	3
2009-06-07 05:00:00	17	-5.37948	-1				2009-06-07 05:00:00	161	22.0342	4
2009-06-07 05:15:00	18	-10.759	2				2009-06-07 05:15:00	160	21.8665	-1
2009-06-07 05:30:00	18	-10.759	2				2009-06-07 05:30:00	156	21.1996	-5
2009-06-07 05:45:00	16	0	0				2009-06-07 05:45:00	161	22.0342	0
2009-06-07 06:00:00	17	-5.37948	X				2009-06-07 06:00:00	161	22.0342	X
2009-06-07 06:15:00	16	0	X				2009-06-07 06:15:00	161	22.0342	X
2009-06-07 06:30:00	16	0	X				2009-06-07 06:30:00	161	22.0342	X
2009-06-07 06:45:00	16	0	X				2009-06-07 06:45:00	161	22.0342	X
2009-06-07 07:00:00	17	-5.37948	0				2009-06-07 07:00:00	161	22.0342	0
2009-06-07 07:15:00	17	-5.37948	1				2009-06-07 07:15:00	151	20.3741	-10
2009-06-07 07:30:00	18	-10.759	2				2009-06-07 07:30:00	159	21.6992	-2
2009-06-07 07:45:00	16	0	0				2009-06-07 07:45:00	160	21.8665	-1
2009-06-07 08:00:00	18	-10.759	1				2009-06-07 08:00:00	158	21.5323	-3
2009-06-07 08:15:00	21	-26.8974	4				2009-06-07 08:15:00	151	20.3741	0
2009-06-07 08:30:00	19	-16.1384	1				2009-06-07 08:30:00	155	21.0338	-4
2009-06-07 08:45:00	21	-26.8974	5				2009-06-07 08:45:00	154	20.8684	-6
2009-06-07 09:00:00	22	-32.2769	4				2009-06-07 09:00:00	156	21.1996	-2
2009-06-07 09:15:00	17	-5.37948	-4				2009-06-07 09:15:00	155	21.0338	4
2009-06-07 09:30:00	18	-10.759	-1				2009-06-07 09:30:00	161	22.0342	6
2009-06-07 09:45:00	17	-5.37948	-4				2009-06-07 09:45:00	159	21.6992	5
2009-06-07 10:00:00	18	-10.759	-4				2009-06-07 10:00:00	161	22.0342	5
2009-06-07 10:15:00	17	-5.37948	0				2009-06-07 10:15:00	161	22.0342	6
2009-06-07 10:30:00	16	0	-2				2009-06-07 10:30:00	161	22.0342	0
2009-06-07 10:45:00	18	-10.759	1				2009-06-07 10:45:00	160	21.8665	1
2009-06-07 11:00:00	19	-16.1384	1				2009-06-07 11:00:00	161	22.0342	0
2009-06-07 11:15:00	20	-21.5179	3				2009-06-07 11:15:00	154	20.8684	-7
2009-06-07 11:30:00	19	-16.1384	3				2009-06-07 11:30:00	155	21.0338	-6
2009-06-07 11:45:00	21	-26.8974	3				2009-06-07 11:45:00	150	20.2101	-10
2009-06-07 12:00:00	20	-21.5179	X				2009-06-07 12:00:00	158	21.5323	X
2009-06-07 12:15:00	19	-16.1384	X				2009-06-07 12:15:00	162	22.2023	X
2009-06-07 12:30:00	17	-5.37948	X				2009-06-07 12:30:00	162	22.2023	X
2009-06-07 12:45:00	17	-5.37948	X				2009-06-07 12:45:00	162	22.2023	X
2009-06-07 13:00:00	17	-5.37948	-3				2009-06-07 13:00:00	162	22.2023	4
2009-06-07 13:15:00	18	-10.759	-1				2009-06-07 13:15:00	161	22.0342	-1
2009-06-07 13:30:00	17	-5.37948	0				2009-06-07 13:30:00	160	21.8665	-2
2009-06-07 13:45:00	18	-10.759	1				2009-06-07 13:45:00	160	21.8665	-2
2009-06-07 14:00:00	19	-16.1384	2				2009-06-07 14:00:00	159	21.6992	-3
2009-06-07 14:15:00	16	0	-2				2009-06-07 14:15:00	160	21.8665	-1
2009-06-07 14:30:00	19	-16.1384	2				2009-06-07 14:30:00	160	21.8665	0
2009-06-07 14:45:00	17	-5.37948	-1				2009-06-07 14:45:00	160	21.8665	0
2009-06-07 15:00:00	17	-5.37948	-2				2009-06-07 15:00:00	160	21.8665	1
2009-06-07 15:15:00	18	-10.759	2				2009-06-07 15:15:00	160	21.8665	0
2009-06-07 15:30:00	17	-5.37948	-2				2009-06-07 15:30:00	160	21.8665	0
2009-06-07 15:45:00	18	-10.759	1				2009-06-07 15:45:00	160	21.8665	0
2009-06-07 16:00:00	16	0	-1				2009-06-07 16:00:00	160	21.8665	0
2009-06-07 16:15:00	16	0	-2				2009-06-07 16:15:00	160	21.8665	0
2009-06-07 16:30:00	16	0	-1				2009-06-07 16:30:00	160	21.8665	0
2009-06-07 16:45:00	17	-5.37948	-1				2009-06-07 16:45:00	160	21.8665	0
2009-06-07 17:00:00	17	-5.37948	1				2009-06-07 17:00:00	160	21.8665	0
2009-06-07 17:15:00	17	-5.37948	1				2009-06-07 17:15:00	160	21.8665	0
2009-06-07 17:30:00	17	-5.37948	1				2009-06-07 17:30:00	161	22.0342	1
2009-06-07 17:45:00	16	0	-1				2009-06-07 17:45:00	161	22.0342	1
2009-06-07 18:00:00	17	-5.37948	X				2009-06-07 18:00:00	162	22.2023	X
2009-06-07 18:15:00	16	0	X				2009-06-07 18:15:00	161	22.0342	X
2009-06-07 18:30:00	16	0	X				2009-06-07 18:30:00	158	21.5323	X
2009-06-07 18:45:00	16	0	X				2009-06-07 18:45:00	161	22.0342	X
2009-06-07 19:00:00	16	0	-1				2009-06-07 19:00:00	161	22.0342	-1
2009-06-07 19:15:00	17	-5.37948	1				2009-06-07 19:15:00	161	22.0342	0
2009-06-07 19:30:00	16	0	0				2009-06-07 19:30:00	161	22.0342	3
2009-06-07 19:45:00	17	-5.37948	1				2009-06-07 19:45:00	161	22.0342	0
2009-06-07 20:00:00	16	0	0				2009-06-07 20:00:00	161	22.0342	0
2009-06-07 20:15:00	19	-16.1384	2				2009-06-07 20:15:00	160	21.8665	-1
2009-06-07 20:30:00	16	0	0				2009-06-07 20:30:00	162	22.2023	1
2009-06-07 20:45:00	17	-5.37948	0				2009-06-07 20:45:00	161	22.0342	0
2009-06-07 21:00:00	17	-5.37948	1				2009-06-07 21:00:00	161	22.0342	0
2009-06-07 21:15:00	17	-5.37948	-2				2009-06-07 21:15:00	161	22.0342	1
2009-06-07 21:30:00	17	-5.37948	1				2009-06-07 21:30:00	161	22.0342	-1
2009-06-07 21:45:00	18	-10.759	1				2009-06-07 21:45:00	161	22.0342	0
2009-06-07 22:00:00	17	-5.37948	0				2009-06-07 22:00:00	157	21.3657	-4
2009-06-07 22:15:00	16	0	-1				2009-06-07 22:15:00	162	22.2023	1
2009-06-07 22:30:00	17	-5.37948	0				2009-06-07 22:30:00	162	22.2023	1
2009-06-07 22:45:00	17	-5.37948	-1				2009-06-07 22:45:00	148	19.8829	-13
2009-06-07 23:00:00	19	-16.1384	2				2009-06-07 23:00:00	161	22.0342	4
2009-06-07 23:15:00	16	0	0				2009-06-07 23:15:00	161	22.0342	-1
2009-06-07 23:30:00	26	-53.7948	9				2009-06-07 23:30:00	154	20.8684	-8
2009-06-07 23:45:00	20	-21.5179	3				2009-06-07 23:45:00	123	15.8825	-25
2009-06-08	17	-5.37948	X				2009-06-08	161	22.0342	X
2009-06-08 00:15:00	16	0	X				2009-06-08 00:15:00	160	21.8665	X
2009-06-08 00:30:00	17	-5.37948	X				2009-06-08 00:30:00	162	22.2023	X
2009-06-08 00:45:00	16	0	X				2009-06-08 00:45:00	160	21.8665	X
2009-06-08 01:00:00	18	-10.759	1				2009-06-08 01:00:00	162	22.2023	1
2009-06-08 01:15:00	17	-5.37948	1				2009-06-08 01:15:00	159	21.6992	-1
2009-06-08 01:30:00	17	-5.37948	0				2009-06-08 01:30:00	161	22.0342	-1
2009-06-08 01:45:00	16	0	0				2009-06-08 01:45:00	160	21.8665	0
2009-06-08 02:00:00	17	-5.37948	-1				2009-06-08 02:00:00	160	21.8665	-2
2009-06-08 02:15:00	16	0	-1				2009-06-08 02:15:00	157	21.3657	-2
2009-06-08 02:30:00	19	-16.1384	2				2009-06-08 02:30:00	159	21.6992	-2
2009-06-08 02:45:00	18	-10.759	2				2009-06-08 02:45:00	162	22.2023	2
2009-06-08 03:00:00	17	-5.37948	0				2009-06-08 03:00:00	161	22.0342	1
2009-06-08 03:15:00	19	-16.1384	3				2009-06-08 03:15:00	153	20.7033	-4
2009-06-08 03:30:00	19	-16.1384	0				2009-06-08 03:30:00	155	21.0338	-4
2009-06-08 03:45:00	19	-16.1384	1				2009-06-08 03:45:00	156	21.1996	-6
2009-06-08 04:00:00	18	-10.759	1				2009-06-08 04:00:00	156	21.1996	-5
2009-06-08 04:15:00	18	-10.759	-1				2009-06-08 04:15:00	159	21.6992	6
2009-06-08 04:30:00	19	-16.1384	0				2009-06-08 04:30:00	149	20.0463	-6
2009-06-08 04:45:00	18	-10.759	-1				2009-06-08 04:45:00	160	21.8665	4
2009-06-08 05:00:00	19	-16.1384	1				2009-06-08 05:00:00	150	20.2101	-6
2009-06-08 05:15:00	20	-21.5179	2				2009-06-08 05:15:00	151	20.3741	-8
2009-06-08 05:30:00	19	-16.1384	0				2009-06-08 05:30:00	161	22.0342	12
2009-06-08 05:45:00	19	-16.1384	1				2009-06-08 05:45:00	153	20.7033	-7
2009-06-08 06:00:00	20	-21.5179	X				2009-06-08 06:00:00	156	21.1996	X
2009-06-08 06:15:00	16	0	X				2009-06-08 06:15:00	159	21.6992	X
2009-06-08 06:30:00	19	-16.1384	X				2009-06-08 06:30:00	159	21.6992	X
2009-06-08 06:45:00	16	0	X				2009-06-08 06:45:00	161	22.0342	X
2009-06-08 07:00:00	17	-5.37948	-3				2009-06-08 07:00:00	163	22.3708	7
2009-06-08 07:15:00	16	0	0				2009-06-08 07:15:00	163	22.3708	4
2009-06-08 07:30:00	16	0	-3				2009-06-08 07:30:00	163	22.3708	4
2009-06-08 07:45:00	20	-21.5179	4				2009-06-08 07:45:00	158	21.5323	-3
2009-06-08 08:00:00	16	0	-1				2009-06-08 08:00:00	162	22.2023	-1
2009-06-08 08:15:00	16	0	0				2009-06-08 08:15:00	162	22.2023	-1
2009-06-08 08:30:00	16	0	0				2009-06-08 08:30:00	162	22.2023	-1
2009-06-08 08:45:00	16	0	-4				2009-06-08 08:45:00	162	22.2023	4
2009-06-08 09:00:00	16	0	0				2009-06-08 09:00:00	161	22.0342	-1
2009-06-08 09:15:00	16	0	0				2009-06-08 09:15:00	162	22.2023	0
2009-06-08 09:30:00	19	-16.1384	3				2009-06-08 09:30:00	155	21.0338	-7
2009-06-08 09:45:00	18	-10.759	2				2009-06-08 09:45:00	156	21.1996	-6
2009-06-08 10:00:00	20	-21.5179	4				2009-06-08 10:00:00	158	21.5323	-3
2009-06-08 10:15:00	19	-16.1384	3				2009-06-08 10:15:00	153	20.7033	-9
2009-06-08 10:30:00	19	-16.1384	0				2009-06-08 10:30:00	153	20.7033	-2
2009-06-08 10:45:00	20	-21.5179	2				2009-06-08 10:45:00	153	20.7033	-3
2009-06-08 11:00:00	16	0	-4				2009-06-08 11:00:00	159	21.6992	1
2009-06-08 11:15:00	18	-10.759	-1				2009-06-08 11:15:00	160	21.8665	7
2009-06-08 11:30:00	20	-21.5179	1				2009-06-08 11:30:00	162	22.2023	9
2009-06-08 11:45:00	17	-5.37948	-3				2009-06-08 11:45:00	156	21.1996	3
2009-06-08 12:00:00	19	-16.1384	X				2009-06-08 12:00:00	159	21.6992	X
2009-06-08 12:15:00	17	-5.37948	X				2009-06-08 12:15:00	161	22.0342	X
2009-06-08 12:30:00	17	-5.37948	X				2009-06-08 12:30:00	161	22.0342	X
2009-06-08 12:45:00	18	-10.759	X				2009-06-08 12:45:00	161	22.0342	X
2009-06-08 13:00:00	17	-5.37948	-2				2009-06-08 13:00:00	161	22.0342	2
2009-06-08 13:15:00	18	-10.759	1				2009-06-08 13:15:00	161	22.0342	0
2009-06-08 13:30:00	18	-10.759	1				2009-06-08 13:30:00	161	22.0342	0
2009-06-08 13:45:00	17	-5.37948	-1				2009-06-08 13:45:00	161	22.0342	0
2009-06-08 14:00:00	18	-10.759	1				2009-06-08 14:00:00	161	22.0342	0
2009-06-08 14:15:00	17	-5.37948	-1				2009-06-08 14:15:00	161	22.0342	0
2009-06-08 14:30:00	17	-5.37948	-1				2009-06-08 14:30:00	161	22.0342	0
2009-06-08 14:45:00	17	-5.37948	0				2009-06-08 14:45:00	162	22.2023	1
2009-06-08 15:00:00	17	-5.37948	-1				2009-06-08 15:00:00	162	22.2023	1
2009-06-08 15:15:00	18	-10.759	1				2009-06-08 15:15:00	162	22.2023	1
2009-06-08 15:30:00	17	-5.37948	0				2009-06-08 15:30:00	162	22.2023	1
2009-06-08 15:45:00	17	-5.37948	0				2009-06-08 15:45:00	162	22.2023	0
2009-06-08 16:00:00	17	-5.37948	0				2009-06-08 16:00:00	163	22.3708	1
2009-06-08 16:15:00	17	-5.37948	-1				2009-06-08 16:15:00	163	22.3708	1
2009-06-08 16:30:00	18	-10.759	1				2009-06-08 16:30:00	163	22.3708	1
2009-06-08 16:45:00	17	-5.37948	0				2009-06-08 16:45:00	163	22.3708	1
2009-06-08 17:00:00	16	0	-1				2009-06-08 17:00:00	163	22.3708	0
2009-06-08 17:15:00	17	-5.37948	0				2009-06-08 17:15:00	162	22.2023	-1
2009-06-08 17:30:00	18	-10.759	0				2009-06-08 17:30:00	162	22.2023	-1
2009-06-08 17:45:00	17	-5.37948	0				2009-06-08 17:45:00	162	22.2023	-1
2009-06-08 18:00:00	16	0	X				2009-06-08 18:00:00	162	22.2023	X
2009-06-08 18:15:00	16	0	X				2009-06-08 18:15:00	162	22.2023	X
2009-06-08 18:30:00	16	0	X				2009-06-08 18:30:00	162	22.2023	X
2009-06-08 18:45:00	17	-5.37948	X				2009-06-08 18:45:00	162	22.2023	X
2009-06-08 19:00:00	16	0	0				2009-06-08 19:00:00	154	20.8684	-8
2009-06-08 19:15:00	16	0	0				2009-06-08 19:15:00	162	22.2023	0
2009-06-08 19:30:00	16	0	0				2009-06-08 19:30:00	163	22.3708	1
2009-06-08 19:45:00	18	-10.759	1				2009-06-08 19:45:00	162	22.2023	0
2009-06-08 20:00:00	17	-5.37948	1				2009-06-08 20:00:00	163	22.3708	9
2009-06-08 20:15:00	16	0	0				2009-06-08 20:15:00	163	22.3708	1
2009-06-08 20:30:00	16	0	0				2009-06-08 20:30:00	163	22.3708	0
2009-06-08 20:45:00	16	0	-2				2009-06-08 20:45:00	163	22.3708	1
2009-06-08 21:00:00	16	0	-1				2009-06-08 21:00:00	161	22.0342	-2
2009-06-08 21:15:00	16	0	0				2009-06-08 21:15:00	163	22.3708	0
2009-06-08 21:30:00	23	-37.6564	7				2009-06-08 21:30:00	157	21.3657	-6
2009-06-08 21:45:00	16	0	0				2009-06-08 21:45:00	163	22.3708	0
2009-06-08 22:00:00	19	-16.1384	3				2009-06-08 22:00:00	129	16.8301	-32		16.8301
2009-06-08 22:15:00	16	0	0				2009-06-08 22:15:00	160	21.8665	-3
2009-06-08 22:30:00	16	0	-7				2009-06-08 22:30:00	140	18.5863	-17
2009-06-08 22:45:00	16	0	0				2009-06-08 22:45:00	163	22.3708	0
2009-06-08 23:00:00	16	0	-3				2009-06-08 23:00:00	160	21.8665	31	21.8665
2009-06-08 23:15:00	16	0	0				2009-06-08 23:15:00	153	20.7033	-7
2009-06-08 23:30:00	16	0	0				2009-06-08 23:30:00	164	22.5397	24
2009-06-08 23:45:00	16	0	0				2009-06-08 23:45:00	164	22.5397	1
2009-06-09	16	0	X				2009-06-09	163	22.3708	X
2009-06-09 00:15:00	16	0	X				2009-06-09 00:15:00	156	21.1996	X
2009-06-09 00:30:00	26	-53.7948	X				2009-06-09 00:30:00	128	16.6718	X
2009-06-09 00:45:00	16	0	X				2009-06-09 00:45:00	164	22.5397	X
2009-06-09 01:00:00	16	0	0				2009-06-09 01:00:00	163	22.3708	0
2009-06-09 01:15:00	19	-16.1384	3				2009-06-09 01:15:00	163	22.3708	7
2009-06-09 01:30:00	16	0	-10				2009-06-09 01:30:00	159	21.6992	31	21.6992
2009-06-09 01:45:00	27	-59.1743	11				2009-06-09 01:45:00	132	17.3065	-32		17.3065
2009-06-09 02:00:00	20	-21.5179	4				2009-06-09 02:00:00	135	17.7847	-28
2009-06-09 02:15:00	16	0	-3				2009-06-09 02:15:00	156	21.1996	-7
2009-06-09 02:30:00	19	-16.1384	3				2009-06-09 02:30:00	159	21.6992	0
2009-06-09 02:45:00	16	0	-11				2009-06-09 02:45:00	162	22.2023	30
2009-06-09 03:00:00	17	-5.37948	-3				2009-06-09 03:00:00	162	22.2023	27
2009-06-09 03:15:00	17	-5.37948	1				2009-06-09 03:15:00	163	22.3708	7
2009-06-09 03:30:00	16	0	-3				2009-06-09 03:30:00	163	22.3708	4
2009-06-09 03:45:00	18	-10.759	2				2009-06-09 03:45:00	160	21.8665	-2
2009-06-09 04:00:00	16	0	-1				2009-06-09 04:00:00	163	22.3708	1
2009-06-09 04:15:00	16	0	-1				2009-06-09 04:15:00	163	22.3708	0
2009-06-09 04:30:00	18	-10.759	2				2009-06-09 04:30:00	162	22.2023	-1
2009-06-09 04:45:00	16	0	-2				2009-06-09 04:45:00	163	22.3708	3
2009-06-09 05:00:00	19	-16.1384	3				2009-06-09 05:00:00	162	22.2023	-1
2009-06-09 05:15:00	18	-10.759	2				2009-06-09 05:15:00	162	22.2023	-1
2009-06-09 05:30:00	19	-16.1384	1				2009-06-09 05:30:00	158	21.5323	-4
2009-06-09 05:45:00	16	0	0				2009-06-09 05:45:00	162	22.2023	-1
2009-06-09 06:00:00	16	0	X				2009-06-09 06:00:00	162	22.2023	X
2009-06-09 06:15:00	16	0	X				2009-06-09 06:15:00	162	22.2023	X
2009-06-09 06:30:00	16	0	X				2009-06-09 06:30:00	162	22.2023	X
2009-06-09 06:45:00	16	0	X				2009-06-09 06:45:00	162	22.2023	X
2009-06-09 07:00:00	17	-5.37948	1				2009-06-09 07:00:00	162	22.2023	0
2009-06-09 07:15:00	17	-5.37948	1				2009-06-09 07:15:00	162	22.2023	0
2009-06-09 07:30:00	16	0	0				2009-06-09 07:30:00	162	22.2023	0
2009-06-09 07:45:00	16	0	0				2009-06-09 07:45:00	162	22.2023	0
2009-06-09 08:00:00	16	0	-1				2009-06-09 08:00:00	162	22.2023	0
2009-06-09 08:15:00	16	0	-1				2009-06-09 08:15:00	162	22.2023	0
2009-06-09 08:30:00	16	0	0				2009-06-09 08:30:00	162	22.2023	0
2009-06-09 08:45:00	16	0	0				2009-06-09 08:45:00	162	22.2023	0
2009-06-09 09:00:00	16	0	0				2009-06-09 09:00:00	162	22.2023	0
2009-06-09 09:15:00	16	0	0				2009-06-09 09:15:00	162	22.2023	0
2009-06-09 09:30:00	17	-5.37948	1				2009-06-09 09:30:00	162	22.2023	0
2009-06-09 09:45:00	16	0	0				2009-06-09 09:45:00	162	22.2023	0
2009-06-09 10:00:00	17	-5.37948	1				2009-06-09 10:00:00	162	22.2023	0
2009-06-09 10:15:00	18	-10.759	2				2009-06-09 10:15:00	162	22.2023	0
2009-06-09 10:30:00	16	0	-1				2009-06-09 10:30:00	162	22.2023	0
2009-06-09 10:45:00	16	0	0				2009-06-09 10:45:00	162	22.2023	0
2009-06-09 11:00:00	17	-5.37948	0				2009-06-09 11:00:00	162	22.2023	0
2009-06-09 11:15:00	19	-16.1384	1				2009-06-09 11:15:00	162	22.2023	0
2009-06-09 11:30:00	20	-21.5179	4				2009-06-09 11:30:00	162	22.2023	0
2009-06-09 11:45:00	18	-10.759	2				2009-06-09 11:45:00	162	22.2023	0
2009-06-09 12:00:00	18	-10.759	X				2009-06-09 12:00:00	163	22.3708	X
2009-06-09 12:15:00	17	-5.37948	X				2009-06-09 12:15:00	163	22.3708	X
2009-06-09 12:30:00	17	-5.37948	X				2009-06-09 12:30:00	163	22.3708	X
2009-06-09 12:45:00	18	-10.759	X				2009-06-09 12:45:00	163	22.3708	X
2009-06-09 13:00:00	18	-10.759	0				2009-06-09 13:00:00	163	22.3708	0
2009-06-09 13:15:00	17	-5.37948	0				2009-06-09 13:15:00	162	22.2023	-1
2009-06-09 13:30:00	18	-10.759	1				2009-06-09 13:30:00	162	22.2023	-1
2009-06-09 13:45:00	17	-5.37948	-1				2009-06-09 13:45:00	162	22.2023	-1
2009-06-09 14:00:00	18	-10.759	0				2009-06-09 14:00:00	162	22.2023	-1
2009-06-09 14:15:00	19	-16.1384	2				2009-06-09 14:15:00	162	22.2023	0
2009-06-09 14:30:00	18	-10.759	0				2009-06-09 14:30:00	162	22.2023	0
2009-06-09 14:45:00	18	-10.759	1				2009-06-09 14:45:00	162	22.2023	0
2009-06-09 15:00:00	19	-16.1384	1				2009-06-09 15:00:00	162	22.2023	0
2009-06-09 15:15:00	18	-10.759	-1				2009-06-09 15:15:00	162	22.2023	0
2009-06-09 15:30:00	17	-5.37948	-1				2009-06-09 15:30:00	162	22.2023	0
2009-06-09 15:45:00	18	-10.759	0				2009-06-09 15:45:00	162	22.2023	0
2009-06-09 16:00:00	17	-5.37948	-2				2009-06-09 16:00:00	162	22.2023	0
2009-06-09 16:15:00	17	-5.37948	-1				2009-06-09 16:15:00	163	22.3708	1
2009-06-09 16:30:00	17	-5.37948	0				2009-06-09 16:30:00	163	22.3708	1
2009-06-09 16:45:00	17	-5.37948	-1				2009-06-09 16:45:00	163	22.3708	1
2009-06-09 17:00:00	17	-5.37948	0				2009-06-09 17:00:00	163	22.3708	1
2009-06-09 17:15:00	18	-10.759	1				2009-06-09 17:15:00	162	22.2023	-1
2009-06-09 17:30:00	16	0	-1				2009-06-09 17:30:00	162	22.2023	-1
2009-06-09 17:45:00	17	-5.37948	0				2009-06-09 17:45:00	162	22.2023	-1
2009-06-09 18:00:00	25	-48.4153	X				2009-06-09 18:00:00	135	17.7847	X
2009-06-09 18:15:00	16	0	X				2009-06-09 18:15:00	162	22.2023	X
2009-06-09 18:30:00	17	-5.37948	X				2009-06-09 18:30:00	162	22.2023	X
2009-06-09 18:45:00	18	-10.759	X				2009-06-09 18:45:00	162	22.2023	X
2009-06-09 19:00:00	17	-5.37948	-8				2009-06-09 19:00:00	162	22.2023	27
2009-06-09 19:15:00	16	0	0				2009-06-09 19:15:00	163	22.3708	1
2009-06-09 19:30:00	18	-10.759	1				2009-06-09 19:30:00	162	22.2023	0
2009-06-09 19:45:00	18	-10.759	0				2009-06-09 19:45:00	150	20.2101	-12
2009-06-09 20:00:00	16	0	-1				2009-06-09 20:00:00	163	22.3708	1
2009-06-09 20:15:00	16	0	0				2009-06-09 20:15:00	163	22.3708	0
2009-06-09 20:30:00	16	0	-2				2009-06-09 20:30:00	163	22.3708	1
2009-06-09 20:45:00	17	-5.37948	-1				2009-06-09 20:45:00	160	21.8665	10
2009-06-09 21:00:00	16	0	0				2009-06-09 21:00:00	163	22.3708	0
2009-06-09 21:15:00	16	0	0				2009-06-09 21:15:00	163	22.3708	0
2009-06-09 21:30:00	16	0	0				2009-06-09 21:30:00	159	21.6992	-4
2009-06-09 21:45:00	25	-48.4153	8				2009-06-09 21:45:00	152	20.5385	-8
2009-06-09 22:00:00	16	0	0				2009-06-09 22:00:00	163	22.3708	0
2009-06-09 22:15:00	17	-5.37948	1				2009-06-09 22:15:00	163	22.3708	0
2009-06-09 22:30:00	16	0	0				2009-06-09 22:30:00	159	21.6992	0
2009-06-09 22:45:00	16	0	-9				2009-06-09 22:45:00	163	22.3708	11
2009-06-09 23:00:00	16	0	0				2009-06-09 23:00:00	163	22.3708	0
2009-06-09 23:15:00	16	0	-1				2009-06-09 23:15:00	159	21.6992	-4
2009-06-09 23:30:00	16	0	0				2009-06-09 23:30:00	163	22.3708	4
2009-06-09 23:45:00	25	-48.4153	9				2009-06-09 23:45:00	156	21.1996	-7
2009-06-10	17	-5.37948	X				2009-06-10	162	22.2023	X
2009-06-10 00:15:00	18	-10.759	X				2009-06-10 00:15:00	162	22.2023	X
2009-06-10 00:30:00	16	0	X				2009-06-10 00:30:00	161	22.0342	X
2009-06-10 00:45:00	17	-5.37948	X				2009-06-10 00:45:00	161	22.0342	X
2009-06-10 01:00:00	17	-5.37948	0				2009-06-10 01:00:00	160	21.8665	-2
2009-06-10 01:15:00	18	-10.759	0				2009-06-10 01:15:00	133	17.4656	-29
2009-06-10 01:30:00	17	-5.37948	1				2009-06-10 01:30:00	151	20.3741	-10
2009-06-10 01:45:00	16	0	-1				2009-06-10 01:45:00	158	21.5323	-3
2009-06-10 02:00:00	18	-10.759	1				2009-06-10 02:00:00	145	19.3945	-15
2009-06-10 02:15:00	17	-5.37948	-1				2009-06-10 02:15:00	158	21.5323	25
2009-06-10 02:30:00	18	-10.759	1				2009-06-10 02:30:00	158	21.5323	7
2009-06-10 02:45:00	16	0	0				2009-06-10 02:45:00	161	22.0342	3
2009-06-10 03:00:00	18	-10.759	0				2009-06-10 03:00:00	161	22.0342	16
2009-06-10 03:15:00	16	0	-1				2009-06-10 03:15:00	161	22.0342	3
2009-06-10 03:30:00	16	0	-2				2009-06-10 03:30:00	161	22.0342	3
2009-06-10 03:45:00	16	0	0				2009-06-10 03:45:00	161	22.0342	0
2009-06-10 04:00:00	16	0	-2				2009-06-10 04:00:00	161	22.0342	0
2009-06-10 04:15:00	16	0	0				2009-06-10 04:15:00	161	22.0342	0
2009-06-10 04:30:00	18	-10.759	2				2009-06-10 04:30:00	161	22.0342	0
2009-06-10 04:45:00	18	-10.759	2				2009-06-10 04:45:00	160	21.8665	-1
2009-06-10 05:00:00	17	-5.37948	1				2009-06-10 05:00:00	161	22.0342	0
2009-06-10 05:15:00	18	-10.759	2				2009-06-10 05:15:00	161	22.0342	0
2009-06-10 05:30:00	19	-16.1384	1				2009-06-10 05:30:00	161	22.0342	0
2009-06-10 05:45:00	21	-26.8974	3				2009-06-10 05:45:00	157	21.3657	-3
2009-06-10 06:00:00	16	0	X				2009-06-10 06:00:00	161	22.0342	X
2009-06-10 06:15:00	20	-21.5179	X				2009-06-10 06:15:00	150	20.2101	X
2009-06-10 06:30:00	20	-21.5179	X				2009-06-10 06:30:00	153	20.7033	X
2009-06-10 06:45:00	21	-26.8974	X				2009-06-10 06:45:00	146	19.557	X
2009-06-10 07:00:00	17	-5.37948	1				2009-06-10 07:00:00	160	21.8665	-1
2009-06-10 07:15:00	20	-21.5179	0				2009-06-10 07:15:00	154	20.8684	4
2009-06-10 07:30:00	21	-26.8974	1				2009-06-10 07:30:00	147	19.7198	-6
2009-06-10 07:45:00	20	-21.5179	-1				2009-06-10 07:45:00	158	21.5323	12
2009-06-10 08:00:00	18	-10.759	1				2009-06-10 08:00:00	153	20.7033	-7
2009-06-10 08:15:00	19	-16.1384	-1				2009-06-10 08:15:00	159	21.6992	5
2009-06-10 08:30:00	20	-21.5179	-1				2009-06-10 08:30:00	160	21.8665	13
2009-06-10 08:45:00	19	-16.1384	-1				2009-06-10 08:45:00	156	21.1996	-2
2009-06-10 09:00:00	19	-16.1384	1				2009-06-10 09:00:00	160	21.8665	7
2009-06-10 09:15:00	17	-5.37948	-2				2009-06-10 09:15:00	155	21.0338	-4
2009-06-10 09:30:00	19	-16.1384	-1				2009-06-10 09:30:00	160	21.8665	0
2009-06-10 09:45:00	21	-26.8974	2				2009-06-10 09:45:00	143	19.0704	-13
2009-06-10 10:00:00	17	-5.37948	-2				2009-06-10 10:00:00	155	21.0338	-5
2009-06-10 10:15:00	17	-5.37948	0				2009-06-10 10:15:00	160	21.8665	5
2009-06-10 10:30:00	17	-5.37948	-2				2009-06-10 10:30:00	152	20.5385	-8
2009-06-10 10:45:00	17	-5.37948	-4				2009-06-10 10:45:00	160	21.8665	17
2009-06-10 11:00:00	20	-21.5179	3				2009-06-10 11:00:00	158	21.5323	3
2009-06-10 11:15:00	17	-5.37948	0				2009-06-10 11:15:00	160	21.8665	0
2009-06-10 11:30:00	17	-5.37948	0				2009-06-10 11:30:00	160	21.8665	8
2009-06-10 11:45:00	17	-5.37948	0				2009-06-10 11:45:00	161	22.0342	1
2009-06-10 12:00:00	17	-5.37948	X				2009-06-10 12:00:00	161	22.0342	X
2009-06-10 12:15:00	17	-5.37948	X				2009-06-10 12:15:00	161	22.0342	X
2009-06-10 12:30:00	17	-5.37948	X				2009-06-10 12:30:00	161	22.0342	X
2009-06-10 12:45:00	17	-5.37948	X				2009-06-10 12:45:00	161	22.0342	X
2009-06-10 13:00:00	17	-5.37948	0				2009-06-10 13:00:00	161	22.0342	0
2009-06-10 13:15:00	18	-10.759	1				2009-06-10 13:15:00	161	22.0342	0
2009-06-10 13:30:00	17	-5.37948	0				2009-06-10 13:30:00	161	22.0342	0
2009-06-10 13:45:00	17	-5.37948	0				2009-06-10 13:45:00	161	22.0342	0
2009-06-10 14:00:00	20	-21.5179	3				2009-06-10 14:00:00	159	21.6992	-2
2009-06-10 14:15:00	17	-5.37948	-1				2009-06-10 14:15:00	161	22.0342	0
2009-06-10 14:30:00	17	-5.37948	0				2009-06-10 14:30:00	161	22.0342	0
2009-06-10 14:45:00	17	-5.37948	0				2009-06-10 14:45:00	161	22.0342	0
2009-06-10 15:00:00	19	-16.1384	-1				2009-06-10 15:00:00	161	22.0342	2
2009-06-10 15:15:00	17	-5.37948	0				2009-06-10 15:15:00	161	22.0342	0
2009-06-10 15:30:00	17	-5.37948	0				2009-06-10 15:30:00	161	22.0342	0
2009-06-10 15:45:00	17	-5.37948	0				2009-06-10 15:45:00	161	22.0342	0
2009-06-10 16:00:00	18	-10.759	-1				2009-06-10 16:00:00	161	22.0342	0
2009-06-10 16:15:00	17	-5.37948	0				2009-06-10 16:15:00	161	22.0342	0
2009-06-10 16:30:00	18	-10.759	1				2009-06-10 16:30:00	148	19.8829	-13
2009-06-10 16:45:00	16	0	-1				2009-06-10 16:45:00	161	22.0342	0
2009-06-10 17:00:00	16	0	-2				2009-06-10 17:00:00	161	22.0342	0
2009-06-10 17:15:00	17	-5.37948	0				2009-06-10 17:15:00	161	22.0342	0
2009-06-10 17:30:00	20	-21.5179	2				2009-06-10 17:30:00	160	21.8665	12
2009-06-10 17:45:00	16	0	0				2009-06-10 17:45:00	162	22.2023	1
2009-06-10 18:00:00	17	-5.37948	X				2009-06-10 18:00:00	161	22.0342	X
2009-06-10 18:15:00	17	-5.37948	X				2009-06-10 18:15:00	161	22.0342	X
2009-06-10 18:30:00	17	-5.37948	X				2009-06-10 18:30:00	162	22.2023	X
2009-06-10 18:45:00	16	0	X				2009-06-10 18:45:00	162	22.2023	X
2009-06-10 19:00:00	16	0	-1				2009-06-10 19:00:00	162	22.2023	1
2009-06-10 19:15:00	16	0	-1				2009-06-10 19:15:00	162	22.2023	1
2009-06-10 19:30:00	18	-10.759	1				2009-06-10 19:30:00	161	22.0342	-1
2009-06-10 19:45:00	16	0	0				2009-06-10 19:45:00	162	22.2023	0
2009-06-10 20:00:00	18	-10.759	2				2009-06-10 20:00:00	161	22.0342	-1
2009-06-10 20:15:00	16	0	0				2009-06-10 20:15:00	162	22.2023	0
2009-06-10 20:30:00	22	-32.2769	4				2009-06-10 20:30:00	161	22.0342	0
2009-06-10 20:45:00	16	0	0				2009-06-10 20:45:00	162	22.2023	0
2009-06-10 21:00:00	16	0	-2				2009-06-10 21:00:00	162	22.2023	1
2009-06-10 21:15:00	16	0	0				2009-06-10 21:15:00	162	22.2023	0
2009-06-10 21:30:00	27	-59.1743	5				2009-06-10 21:30:00	144	19.2323	-17
2009-06-10 21:45:00	17	-5.37948	1				2009-06-10 21:45:00	161	22.0342	-1
2009-06-10 22:00:00	16	0	0				2009-06-10 22:00:00	162	22.2023	0
2009-06-10 22:15:00	17	-5.37948	1				2009-06-10 22:15:00	152	20.5385	-10
2009-06-10 22:30:00	16	0	-11				2009-06-10 22:30:00	162	22.2023	18
2009-06-10 22:45:00	16	0	-1				2009-06-10 22:45:00	163	22.3708	2
2009-06-10 23:00:00	17	-5.37948	1				2009-06-10 23:00:00	159	21.6992	-3
2009-06-10 23:15:00	17	-5.37948	0				2009-06-10 23:15:00	162	22.2023	10
2009-06-10 23:30:00	17	-5.37948	1				2009-06-10 23:30:00	163	22.3708	1
2009-06-10 23:45:00	17	-5.37948	1				2009-06-10 23:45:00	162	22.2023	-1
2009-06-11	29	-69.9332	X				2009-06-11	140	18.5863	X
2009-06-11 00:15:00	16	0	X				2009-06-11 00:15:00	163	22.3708	X
2009-06-11 00:30:00	17	-5.37948	X				2009-06-11 00:30:00	163	22.3708	X
2009-06-11 00:45:00	17	-5.37948	X				2009-06-11 00:45:00	159	21.6992	X
2009-06-11 01:00:00	17	-5.37948	-12				2009-06-11 01:00:00	163	22.3708	23
2009-06-11 01:15:00	17	-5.37948	1				2009-06-11 01:15:00	162	22.2023	-1
2009-06-11 01:30:00	17	-5.37948	0				2009-06-11 01:30:00	162	22.2023	-1
2009-06-11 01:45:00	16	0	-1				2009-06-11 01:45:00	154	20.8684	-5
2009-06-11 02:00:00	16	0	-1				2009-06-11 02:00:00	155	21.0338	-8
2009-06-11 02:15:00	18	-10.759	1				2009-06-11 02:15:00	156	21.1996	-6
2009-06-11 02:30:00	17	-5.37948	0				2009-06-11 02:30:00	161	22.0342	-1
2009-06-11 02:45:00	19	-16.1384	3				2009-06-11 02:45:00	161	22.0342	7
2009-06-11 03:00:00	18	-10.759	2				2009-06-11 03:00:00	161	22.0342	6
2009-06-11 03:15:00	17	-5.37948	-1				2009-06-11 03:15:00	162	22.2023	6
2009-06-11 03:30:00	16	0	-1				2009-06-11 03:30:00	162	22.2023	1
2009-06-11 03:45:00	16	0	-3				2009-06-11 03:45:00	162	22.2023	1
2009-06-11 04:00:00	16	0	-2				2009-06-11 04:00:00	162	22.2023	1
2009-06-11 04:15:00	23	-37.6564	6				2009-06-11 04:15:00	154	20.8684	-8
2009-06-11 04:30:00	18	-10.759	2				2009-06-11 04:30:00	162	22.2023	0
2009-06-11 04:45:00	17	-5.37948	1				2009-06-11 04:45:00	161	22.0342	-1
2009-06-11 05:00:00	20	-21.5179	4				2009-06-11 05:00:00	160	21.8665	-2
2009-06-11 05:15:00	16	0	-7				2009-06-11 05:15:00	160	21.8665	6
2009-06-11 05:30:00	17	-5.37948	-1				2009-06-11 05:30:00	162	22.2023	0
2009-06-11 05:45:00	16	0	-1				2009-06-11 05:45:00	160	21.8665	-1
2009-06-11 06:00:00	20	-21.5179	X				2009-06-11 06:00:00	139	18.4255	X
2009-06-11 06:15:00	20	-21.5179	X				2009-06-11 06:15:00	137	18.1046	X
2009-06-11 06:30:00	22	-32.2769	X				2009-06-11 06:30:00	133	17.4656	X
2009-06-11 06:45:00	21	-26.8974	X				2009-06-11 06:45:00	134	17.625	X
2009-06-11 07:00:00	19	-16.1384	-1				2009-06-11 07:00:00	150	20.2101	11
2009-06-11 07:15:00	21	-26.8974	1				2009-06-11 07:15:00	136	17.9445	-1
2009-06-11 07:30:00	21	-26.8974	-1				2009-06-11 07:30:00	135	17.7847	2
2009-06-11 07:45:00	22	-32.2769	1				2009-06-11 07:45:00	138	18.2649	4
2009-06-11 08:00:00	22	-32.2769	3				2009-06-11 08:00:00	136	17.9445	-14
2009-06-11 08:15:00	20	-21.5179	-1				2009-06-11 08:15:00	134	17.625	-2
2009-06-11 08:30:00	22	-32.2769	1				2009-06-11 08:30:00	137	18.1046	2
2009-06-11 08:45:00	17	-5.37948	-5				2009-06-11 08:45:00	161	22.0342	23
2009-06-11 09:00:00	17	-5.37948	-5				2009-06-11 09:00:00	153	20.7033	17
2009-06-11 09:15:00	17	-5.37948	-3				2009-06-11 09:15:00	162	22.2023	28
2009-06-11 09:30:00	18	-10.759	-4				2009-06-11 09:30:00	161	22.0342	24
2009-06-11 09:45:00	17	-5.37948	0				2009-06-11 09:45:00	162	22.2023	1
2009-06-11 10:00:00	18	-10.759	1				2009-06-11 10:00:00	161	22.0342	8
2009-06-11 10:15:00	18	-10.759	1				2009-06-11 10:15:00	161	22.0342	-1
2009-06-11 10:30:00	19	-16.1384	1				2009-06-11 10:30:00	161	22.0342	0
2009-06-11 10:45:00	17	-5.37948	0				2009-06-11 10:45:00	161	22.0342	-1
2009-06-11 11:00:00	21	-26.8974	3				2009-06-11 11:00:00	150	20.2101	-11
2009-06-11 11:15:00	17	-5.37948	-1				2009-06-11 11:15:00	161	22.0342	0
2009-06-11 11:30:00	18	-10.759	-1				2009-06-11 11:30:00	161	22.0342	0
2009-06-11 11:45:00	17	-5.37948	0				2009-06-11 11:45:00	161	22.0342	0
2009-06-11 12:00:00	21	-26.8974	X				2009-06-11 12:00:00	160	21.8665	X
2009-06-11 12:15:00	19	-16.1384	X				2009-06-11 12:15:00	161	22.0342	X
2009-06-11 12:30:00	17	-5.37948	X				2009-06-11 12:30:00	161	22.0342	X
2009-06-11 12:45:00	17	-5.37948	X				2009-06-11 12:45:00	161	22.0342	X
2009-06-11 13:00:00	17	-5.37948	-4				2009-06-11 13:00:00	161	22.0342	1
2009-06-11 13:15:00	18	-10.759	-1				2009-06-11 13:15:00	161	22.0342	0
2009-06-11 13:30:00	16	0	-1				2009-06-11 13:30:00	161	22.0342	0
2009-06-11 13:45:00	16	0	-1				2009-06-11 13:45:00	161	22.0342	0
2009-06-11 14:00:00	18	-10.759	1				2009-06-11 14:00:00	161	22.0342	0
2009-06-11 14:15:00	16	0	-2				2009-06-11 14:15:00	161	22.0342	0
2009-06-11 14:30:00	17	-5.37948	1				2009-06-11 14:30:00	161	22.0342	0
2009-06-11 14:45:00	16	0	0				2009-06-11 14:45:00	161	22.0342	0
2009-06-11 15:00:00	16	0	-2				2009-06-11 15:00:00	160	21.8665	-1
2009-06-11 15:15:00	17	-5.37948	1				2009-06-11 15:15:00	161	22.0342	0
2009-06-11 15:30:00	18	-10.759	1				2009-06-11 15:30:00	161	22.0342	0
2009-06-11 15:45:00	18	-10.759	2				2009-06-11 15:45:00	161	22.0342	0
2009-06-11 16:00:00	19	-16.1384	3				2009-06-11 16:00:00	157	21.3657	-3
2009-06-11 16:15:00	18	-10.759	1				2009-06-11 16:15:00	161	22.0342	0
2009-06-11 16:30:00	17	-5.37948	-1				2009-06-11 16:30:00	161	22.0342	0
2009-06-11 16:45:00	16	0	-2				2009-06-11 16:45:00	161	22.0342	0
2009-06-11 17:00:00	16	0	-3				2009-06-11 17:00:00	161	22.0342	4
2009-06-11 17:15:00	17	-5.37948	-1				2009-06-11 17:15:00	161	22.0342	0
2009-06-11 17:30:00	17	-5.37948	0				2009-06-11 17:30:00	161	22.0342	0
2009-06-11 17:45:00	18	-10.759	2				2009-06-11 17:45:00	161	22.0342	0
2009-06-11 18:00:00	17	-5.37948	X				2009-06-11 18:00:00	161	22.0342	X
2009-06-11 18:15:00	17	-5.37948	X				2009-06-11 18:15:00	161	22.0342	X
2009-06-11 18:30:00	17	-5.37948	X				2009-06-11 18:30:00	161	22.0342	X
2009-06-11 18:45:00	16	0	X				2009-06-11 18:45:00	161	22.0342	X
2009-06-11 19:00:00	17	-5.37948	0				2009-06-11 19:00:00	162	22.2023	1
2009-06-11 19:15:00	17	-5.37948	0				2009-06-11 19:15:00	162	22.2023	1
2009-06-11 19:30:00	18	-10.759	1				2009-06-11 19:30:00	161	22.0342	0
2009-06-11 19:45:00	16	0	0				2009-06-11 19:45:00	162	22.2023	1
2009-06-11 20:00:00	16	0	-1				2009-06-11 20:00:00	161	22.0342	-1
2009-06-11 20:15:00	16	0	-1				2009-06-11 20:15:00	163	22.3708	1
2009-06-11 20:30:00	16	0	-2				2009-06-11 20:30:00	162	22.2023	1
2009-06-11 20:45:00	17	-5.37948	1				2009-06-11 20:45:00	162	22.2023	0
2009-06-11 21:00:00	26	-53.7948	10				2009-06-11 21:00:00	129	16.8301	-32		16.8301
2009-06-11 21:15:00	16	0	0				2009-06-11 21:15:00	162	22.2023	-1
2009-06-11 21:30:00	16	0	0				2009-06-11 21:30:00	162	22.2023	0
2009-06-11 21:45:00	16	0	-1				2009-06-11 21:45:00	163	22.3708	1
2009-06-11 22:00:00	16	0	-10				2009-06-11 22:00:00	153	20.7033	24
2009-06-11 22:15:00	16	0	0				2009-06-11 22:15:00	163	22.3708	1
2009-06-11 22:30:00	16	0	0				2009-06-11 22:30:00	163	22.3708	1
2009-06-11 22:45:00	16	0	0				2009-06-11 22:45:00	158	21.5323	-5
2009-06-11 23:00:00	16	0	0				2009-06-11 23:00:00	163	22.3708	10
2009-06-11 23:15:00	29	-69.9332	13				2009-06-11 23:15:00	143	19.0704	-20
2009-06-11 23:30:00	16	0	0				2009-06-11 23:30:00	162	22.2023	-1
2009-06-11 23:45:00	32	-86.0717	16				2009-06-11 23:45:00	135	17.7847	-23
2009-06-12	16	0	X				2009-06-12	162	22.2023	X
2009-06-12 00:15:00	17	-5.37948	X				2009-06-12 00:15:00	162	22.2023	X
2009-06-12 00:30:00	21	-26.8974	X				2009-06-12 00:30:00	118	15.0969	X
2009-06-12 00:45:00	16	0	X				2009-06-12 00:45:00	162	22.2023	X
2009-06-12 01:00:00	17	-5.37948	1				2009-06-12 01:00:00	163	22.3708	1
2009-06-12 01:15:00	16	0	-1				2009-06-12 01:15:00	162	22.2023	0
2009-06-12 01:30:00	16	0	-5				2009-06-12 01:30:00	149	20.0463	31	20.0463
2009-06-12 01:45:00	27	-59.1743	11				2009-06-12 01:45:00	131	17.1475	-31
2009-06-12 02:00:00	19	-16.1384	2				2009-06-12 02:00:00	143	19.0704	-20
2009-06-12 02:15:00	18	-10.759	2				2009-06-12 02:15:00	156	21.1996	-6
2009-06-12 02:30:00	18	-10.759	2				2009-06-12 02:30:00	161	22.0342	12
2009-06-12 02:45:00	19	-16.1384	-8				2009-06-12 02:45:00	162	22.2023	31	22.2023
2009-06-12 03:00:00	20	-21.5179	1				2009-06-12 03:00:00	156	21.1996	13
2009-06-12 03:15:00	19	-16.1384	1				2009-06-12 03:15:00	161	22.0342	5
2009-06-12 03:30:00	16	0	-2				2009-06-12 03:30:00	163	22.3708	2
2009-06-12 03:45:00	16	0	-3				2009-06-12 03:45:00	164	22.5397	2
2009-06-12 04:00:00	17	-5.37948	-3				2009-06-12 04:00:00	163	22.3708	7
2009-06-12 04:15:00	19	-16.1384	0				2009-06-12 04:15:00	142	18.9088	-19
2009-06-12 04:30:00	20	-21.5179	4				2009-06-12 04:30:00	144	19.2323	-19
2009-06-12 04:45:00	20	-21.5179	4				2009-06-12 04:45:00	147	19.7198	-17
2009-06-12 05:00:00	18	-10.759	1				2009-06-12 05:00:00	158	21.5323	-5
2009-06-12 05:15:00	20	-21.5179	1				2009-06-12 05:15:00	140	18.5863	-2
2009-06-12 05:30:00	19	-16.1384	-1				2009-06-12 05:30:00	142	18.9088	-2
2009-06-12 05:45:00	23	-37.6564	3				2009-06-12 05:45:00	130	16.9887	-17
2009-06-12 06:00:00	18	-10.759	X				2009-06-12 06:00:00	154	20.8684	X
2009-06-12 06:15:00	18	-10.759	X				2009-06-12 06:15:00	159	21.6992	X
2009-06-12 06:30:00	20	-21.5179	X				2009-06-12 06:30:00	156	21.1996	X
2009-06-12 06:45:00	20	-21.5179	X				2009-06-12 06:45:00	147	19.7198	X
2009-06-12 07:00:00	20	-21.5179	2				2009-06-12 07:00:00	159	21.6992	5
2009-06-12 07:15:00	20	-21.5179	2				2009-06-12 07:15:00	140	18.5863	-19
2009-06-12 07:30:00	21	-26.8974	1				2009-06-12 07:30:00	143	19.0704	-13
2009-06-12 07:45:00	22	-32.2769	2				2009-06-12 07:45:00	129	16.8301	-18
2009-06-12 08:00:00	24	-43.0358	4				2009-06-12 08:00:00	127	16.5136	-32		16.5136
2009-06-12 08:15:00	21	-26.8974	1				2009-06-12 08:15:00	146	19.557	6
2009-06-12 08:30:00	22	-32.2769	1				2009-06-12 08:30:00	140	18.5863	-3
2009-06-12 08:45:00	23	-37.6564	1				2009-06-12 08:45:00	147	19.7198	18
2009-06-12 09:00:00	24	-43.0358	0				2009-06-12 09:00:00	131	17.1475	4
2009-06-12 09:15:00	23	-37.6564	2				2009-06-12 09:15:00	140	18.5863	-6
2009-06-12 09:30:00	23	-37.6564	1				2009-06-12 09:30:00	136	17.9445	-4
2009-06-12 09:45:00	22	-32.2769	-1				2009-06-12 09:45:00	134	17.625	-13
2009-06-12 10:00:00	21	-26.8974	-3				2009-06-12 10:00:00	160	21.8665	29
2009-06-12 10:15:00	23	-37.6564	0				2009-06-12 10:15:00	135	17.7847	-5
2009-06-12 10:30:00	23	-37.6564	0				2009-06-12 10:30:00	137	18.1046	1
2009-06-12 10:45:00	23	-37.6564	1				2009-06-12 10:45:00	138	18.2649	4
2009-06-12 11:00:00	23	-37.6564	2				2009-06-12 11:00:00	137	18.1046	-23
2009-06-12 11:15:00	19	-16.1384	-4				2009-06-12 11:15:00	157	21.3657	22
2009-06-12 11:30:00	22	-32.2769	-1				2009-06-12 11:30:00	126	16.3555	-11
2009-06-12 11:45:00	18	-10.759	-5				2009-06-12 11:45:00	147	19.7198	9
2009-06-12 12:00:00	29	-69.9332	X				2009-06-12 12:00:00	117	14.9402	X
2009-06-12 12:15:00	17	-5.37948	X				2009-06-12 12:15:00	161	22.0342	X
2009-06-12 12:30:00	17	-5.37948	X				2009-06-12 12:30:00	162	22.2023	X
2009-06-12 12:45:00	17	-5.37948	X				2009-06-12 12:45:00	163	22.3708	X
2009-06-12 13:00:00	18	-10.759	-11				2009-06-12 13:00:00	148	19.8829	31	19.8829
2009-06-12 13:15:00	17	-5.37948	0				2009-06-12 13:15:00	162	22.2023	1
2009-06-12 13:30:00	18	-10.759	1				2009-06-12 13:30:00	162	22.2023	0
2009-06-12 13:45:00	18	-10.759	1				2009-06-12 13:45:00	163	22.3708	0
2009-06-12 14:00:00	17	-5.37948	-1				2009-06-12 14:00:00	163	22.3708	15
2009-06-12 14:15:00	19	-16.1384	2				2009-06-12 14:15:00	163	22.3708	1
2009-06-12 14:30:00	17	-5.37948	-1				2009-06-12 14:30:00	162	22.2023	0
2009-06-12 14:45:00	19	-16.1384	1				2009-06-12 14:45:00	162	22.2023	-1
2009-06-12 15:00:00	17	-5.37948	0				2009-06-12 15:00:00	163	22.3708	0
2009-06-12 15:15:00	17	-5.37948	-2				2009-06-12 15:15:00	162	22.2023	-1
2009-06-12 15:30:00	17	-5.37948	0				2009-06-12 15:30:00	162	22.2023	0
2009-06-12 15:45:00	17	-5.37948	-2				2009-06-12 15:45:00	162	22.2023	0
2009-06-12 16:00:00	17	-5.37948	0				2009-06-12 16:00:00	162	22.2023	-1
2009-06-12 16:15:00	17	-5.37948	0				2009-06-12 16:15:00	162	22.2023	0
2009-06-12 16:30:00	19	-16.1384	2				2009-06-12 16:30:00	163	22.3708	1
2009-06-12 16:45:00	17	-5.37948	0				2009-06-12 16:45:00	162	22.2023	0
2009-06-12 17:00:00	19	-16.1384	2				2009-06-12 17:00:00	150	20.2101	-12
2009-06-12 17:15:00	16	0	-1				2009-06-12 17:15:00	163	22.3708	1
2009-06-12 17:30:00	16	0	-3				2009-06-12 17:30:00	163	22.3708	0
2009-06-12 17:45:00	16	0	-1				2009-06-12 17:45:00	164	22.5397	2
2009-06-12 18:00:00	18	-10.759	X				2009-06-12 18:00:00	164	22.5397	X
2009-06-12 18:15:00	16	0	X				2009-06-12 18:15:00	164	22.5397	X
2009-06-12 18:30:00	16	0	X				2009-06-12 18:30:00	164	22.5397	X
2009-06-12 18:45:00	17	-5.37948	X				2009-06-12 18:45:00	164	22.5397	X
2009-06-12 19:00:00	16	0	-2				2009-06-12 19:00:00	165	22.709	1
2009-06-12 19:15:00	17	-5.37948	1				2009-06-12 19:15:00	164	22.5397	0
2009-06-12 19:30:00	20	-21.5179	4				2009-06-12 19:30:00	163	22.3708	-1
2009-06-12 19:45:00	17	-5.37948	0				2009-06-12 19:45:00	164	22.5397	0
2009-06-12 20:00:00	17	-5.37948	1				2009-06-12 20:00:00	165	22.709	0
2009-06-12 20:15:00	19	-16.1384	2				2009-06-12 20:15:00	164	22.5397	0
2009-06-12 20:30:00	17	-5.37948	-3				2009-06-12 20:30:00	165	22.709	2
2009-06-12 20:45:00	17	-5.37948	0				2009-06-12 20:45:00	165	22.709	1
2009-06-12 21:00:00	17	-5.37948	0				2009-06-12 21:00:00	165	22.709	0
2009-06-12 21:15:00	20	-21.5179	1				2009-06-12 21:15:00	132	17.3065	-32		17.3065
2009-06-12 21:30:00	16	0	-1				2009-06-12 21:30:00	165	22.709	0
2009-06-12 21:45:00	16	0	-1				2009-06-12 21:45:00	166	22.8787	1
2009-06-12 22:00:00	28	-64.5538	11				2009-06-12 22:00:00	133	17.4656	-32		17.4656
2009-06-12 22:15:00	16	0	-4				2009-06-12 22:15:00	163	22.3708	31	22.3708
2009-06-12 22:30:00	16	0	0				2009-06-12 22:30:00	165	22.709	0
2009-06-12 22:45:00	18	-10.759	2				2009-06-12 22:45:00	164	22.5397	-2
2009-06-12 23:00:00	16	0	-12				2009-06-12 23:00:00	164	22.5397	31	22.5397
2009-06-12 23:15:00	18	-10.759	2				2009-06-12 23:15:00	135	17.7847	-28
2009-06-12 23:30:00	16	0	0				2009-06-12 23:30:00	165	22.709	0
2009-06-12 23:45:00	17	-5.37948	-1				2009-06-12 23:45:00	166	22.8787	2
2009-06-13	17	-5.37948	X				2009-06-13	166	22.8787	X
2009-06-13 00:15:00	18	-10.759	X				2009-06-13 00:15:00	148	19.8829	X
2009-06-13 00:30:00	17	-5.37948	X				2009-06-13 00:30:00	165	22.709	X
2009-06-13 00:45:00	25	-48.4153	X				2009-06-13 00:45:00	157	21.3657	X
2009-06-13 01:00:00	16	0	-1				2009-06-13 01:00:00	164	22.5397	-2
2009-06-13 01:15:00	18	-10.759	0				2009-06-13 01:15:00	164	22.5397	16
2009-06-13 01:30:00	17	-5.37948	0				2009-06-13 01:30:00	165	22.709	0
2009-06-13 01:45:00	18	-10.759	-7				2009-06-13 01:45:00	129	16.8301	-28
2009-06-13 02:00:00	18	-10.759	2				2009-06-13 02:00:00	164	22.5397	0
2009-06-13 02:15:00	16	0	-2				2009-06-13 02:15:00	162	22.2023	-2
2009-06-13 02:30:00	29	-69.9332	12				2009-06-13 02:30:00	146	19.557	-19
2009-06-13 02:45:00	17	-5.37948	-1				2009-06-13 02:45:00	160	21.8665	31	21.8665
2009-06-13 03:00:00	21	-26.8974	3				2009-06-13 03:00:00	148	19.8829	-16
2009-06-13 03:15:00	18	-10.759	2				2009-06-13 03:15:00	163	22.3708	1
2009-06-13 03:30:00	20	-21.5179	-9				2009-06-13 03:30:00	156	21.1996	10
2009-06-13 03:45:00	18	-10.759	1				2009-06-13 03:45:00	164	22.5397	4
2009-06-13 04:00:00	18	-10.759	-3				2009-06-13 04:00:00	162	22.2023	14
2009-06-13 04:15:00	18	-10.759	0				2009-06-13 04:15:00	164	22.5397	1
2009-06-13 04:30:00	18	-10.759	-2				2009-06-13 04:30:00	156	21.1996	0
2009-06-13 04:45:00	18	-10.759	0				2009-06-13 04:45:00	161	22.0342	-3
2009-06-13 05:00:00	19	-16.1384	1				2009-06-13 05:00:00	153	20.7033	-9
2009-06-13 05:15:00	19	-16.1384	1				2009-06-13 05:15:00	155	21.0338	-9
2009-06-13 05:30:00	19	-16.1384	1				2009-06-13 05:30:00	157	21.3657	1
2009-06-13 05:45:00	19	-16.1384	1				2009-06-13 05:45:00	157	21.3657	-4
2009-06-13 06:00:00	20	-21.5179	X				2009-06-13 06:00:00	150	20.2101	X
2009-06-13 06:15:00	21	-26.8974	X				2009-06-13 06:15:00	145	19.3945	X
2009-06-13 06:30:00	22	-32.2769	X				2009-06-13 06:30:00	135	17.7847	X
2009-06-13 06:45:00	20	-21.5179	X				2009-06-13 06:45:00	153	20.7033	X
2009-06-13 07:00:00	20	-21.5179	0				2009-06-13 07:00:00	153	20.7033	3
2009-06-13 07:15:00	21	-26.8974	0				2009-06-13 07:15:00	157	21.3657	12
2009-06-13 07:30:00	17	-5.37948	-5				2009-06-13 07:30:00	154	20.8684	19
2009-06-13 07:45:00	16	0	-4				2009-06-13 07:45:00	160	21.8665	7
2009-06-13 08:00:00	18	-10.759	-2				2009-06-13 08:00:00	146	19.557	-7
2009-06-13 08:15:00	16	0	-5				2009-06-13 08:15:00	163	22.3708	6
2009-06-13 08:30:00	17	-5.37948	0				2009-06-13 08:30:00	162	22.2023	8
2009-06-13 08:45:00	22	-32.2769	6				2009-06-13 08:45:00	161	22.0342	1
2009-06-13 09:00:00	23	-37.6564	5				2009-06-13 09:00:00	137	18.1046	-9
2009-06-13 09:15:00	26	-53.7948	10				2009-06-13 09:15:00	142	18.9088	-21
2009-06-13 09:30:00	18	-10.759	1				2009-06-13 09:30:00	159	21.6992	-3
2009-06-13 09:45:00	24	-43.0358	2				2009-06-13 09:45:00	160	21.8665	-1
2009-06-13 10:00:00	19	-16.1384	-4				2009-06-13 10:00:00	142	18.9088	5
2009-06-13 10:15:00	23	-37.6564	-3				2009-06-13 10:15:00	146	19.557	4
2009-06-13 10:30:00	19	-16.1384	1				2009-06-13 10:30:00	159	21.6992	0
2009-06-13 10:45:00	21	-26.8974	-3				2009-06-13 10:45:00	135	17.7847	-25
2009-06-13 11:00:00	19	-16.1384	0				2009-06-13 11:00:00	153	20.7033	11
2009-06-13 11:15:00	18	-10.759	-5				2009-06-13 11:15:00	163	22.3708	17
2009-06-13 11:30:00	19	-16.1384	0				2009-06-13 11:30:00	163	22.3708	4
2009-06-13 11:45:00	17	-5.37948	-4				2009-06-13 11:45:00	164	22.5397	29
2009-06-13 12:00:00	18	-10.759	X				2009-06-13 12:00:00	164	22.5397	X
2009-06-13 12:15:00	17	-5.37948	X				2009-06-13 12:15:00	164	22.5397	X
2009-06-13 12:30:00	18	-10.759	X				2009-06-13 12:30:00	164	22.5397	X
2009-06-13 12:45:00	103	-468.015	X				2009-06-13 12:45:00	71	7.74523	X
2009-06-13 13:00:00	19	-16.1384	1				2009-06-13 13:00:00	159	21.6992	-5
2009-06-13 13:15:00	17	-5.37948	0				2009-06-13 13:15:00	164	22.5397	0
[truncated: 3,906 more rows]

## Sheet: WS3
Archival Data							Archival Data							Latitude and Longitude for Tag 88691
Date/Time	Press(val)	Depth(m)	Delta(val)	Δ Lim Dives	Δ Lim Ascents		Date/Time	Temp(val)	Temp(C)	Delta(val)	Δ Lim Inc Temp	Δ Lim Dec Temp		Date	Lat (N)	Long (W)		Lat (Avg)	Long (Avg)
2009-05-24 00:30:00	16	-5.37948	X				2009-05-24 00:45:00	200	28.9493	X				2009-05-24
2009-05-24 01:30:00	16	-5.37948	0				2009-05-24 01:45:00	200	28.9493	0				2009-05-25	24.0656	109.731		24.3168	110.122		Start Point
2009-05-24 02:30:00	16	-5.37948	0				2009-05-24 02:45:00	200	28.9493	0				2009-05-26	24.0894	110.831		23.8831	110.129		2009-05-24
2009-05-24 03:30:00	16	-5.37948	0				2009-05-24 03:45:00	200	28.9493	0				2009-05-27	24.7955	109.805		23.2626	110.003		Lat (N)	Long (W)
2009-05-24 04:30:00	16	-5.37948	0				2009-05-24 04:45:00	200	28.9493	0				2009-05-28	22.5818	110.151		22.7627	109.799		24.155	110.281
2009-05-24 05:30:00	16	-5.37948	0				2009-05-24 05:45:00	200	28.9493	0				2009-05-29	20.7806	109.495		22.4104	109.618
2009-05-24 06:30:00	16	-5.37948	X				2009-05-24 06:45:00	200	28.9493	X				2009-05-30	21.5662	108.712		20.9393	110.236
2009-05-24 07:30:00	16	-5.37948	0				2009-05-24 07:45:00	200	28.9493	0				2009-05-31	22.3279	109.928		20.5109	110.201		End Point
2009-05-24 08:30:00	16	-5.37948	0				2009-05-24 08:45:00	200	28.9493	0				2009-06-01	17.4402	112.892		20.4871	110.682		2009-10-12 01:17:54
2009-05-24 09:30:00	16	-5.37948	0				2009-05-24 09:45:00	200	28.9493	0				2009-06-02	20.4395	109.979		19.9586	111.586		Lat (N)	Long (W)
2009-05-24 10:30:00	16	-5.37948	0				2009-05-24 10:45:00	200	28.9493	0				2009-06-04	20.6616	111.899		19.0208	112.013		26.829	115.852
2009-05-24 11:30:00	16	-5.37948	0				2009-05-24 11:45:00	200	28.9493	0				2009-06-05	18.924	113.231		19.646	111.813
2009-05-24 12:30:00	16	-5.37948	X				2009-05-24 12:45:00	200	28.9493	X				2009-06-06	17.6385	112.062		19.2858	112.286
2009-05-24 13:30:00	16	-5.37948	0				2009-05-24 13:45:00	200	28.9493	0				2009-06-07	20.5664	111.892		19.0493	112.316		Pop Reason
2009-05-24 14:30:00	16	-5.37948	0				2009-05-24 14:45:00	200	28.9493	0				2009-06-08	18.6383	112.346		19.1906	111.845		Constant Pressure
2009-05-24 15:30:00	16	-5.37948	0				2009-05-24 15:45:00	200	28.9493	0				2009-06-09	19.4794	112.048		19.4841	111.847		Data %	0.325951
2009-05-24 16:30:00	16	-5.37948	0				2009-05-24 16:45:00	200	28.9493	0				2009-06-10	19.6301	110.875		19.1334	111.949
2009-05-24 17:30:00	16	-5.37948	0				2009-05-24 17:45:00	197	28.387	-3				2009-06-11	19.1064	112.075		19.1112	111.674
2009-05-24 18:30:00	16	-5.37948	X				2009-05-24 18:45:00	205	29.8995	X				2009-06-12	18.8129	112.399		18.7716	111.574
2009-05-24 19:30:00	16	-5.37948	0				2009-05-24 19:45:00	173	24.0794	-32		24.0794		2009-06-13	18.5272	110.973		18.532	111.722
2009-05-24 20:30:00	31	-86.0717	15				2009-05-24 20:45:00	168	23.2195	-5				2009-06-14	17.7814	111.546		18.5248	111.795
2009-05-24 21:30:00	27	-64.5538	-4				2009-05-24 21:45:00	136	17.9445	-32		17.9445		2009-06-15	18.432	111.618		18.5248	111.618
2009-05-24 22:30:00	15	0	-12				2009-05-24 22:45:00	156	21.1996	20				2009-06-16	19.0707	112.44		18.6216	111.789
2009-05-24 23:30:00	15	0	0				2009-05-24 23:45:00	157	21.3657	1				2009-06-17	18.8129	111.511		18.2138	111.636
2009-05-26	16	-5.37948	X				2009-05-25 00:15:00	168	23.2195	X				2009-06-18	19.0112	111.832		18.3217	111.857
2009-05-26 00:30:00	16	-5.37948	X				2009-05-25 01:15:00	136	17.9445	-32		17.9445		2009-06-19	15.7422	110.777		18.4336	112.177
2009-05-26 01:00:00	31	-86.0717	15				2009-05-25 02:15:00	157	21.3657	21				2009-06-20	18.9716	112.723		18.7288	112.698
2009-05-26 01:30:00	29	-75.3127	13				2009-05-25 03:15:00	157	21.3657	0				2009-06-21	19.6301	114.043		18.9858	113.043
2009-05-26 02:00:00	16	-5.37948	-15				2009-05-25 04:15:00	151	20.3741	-6				2009-06-22	20.2887	114.113		20.157	113.588
2009-05-26 02:30:00	16	-5.37948	-13				2009-05-25 05:15:00	159	21.6992	8				2009-06-23	20.2966	113.558		20.5569	113.759
2009-05-26 03:00:00	16	-5.37948	0				2009-05-25 06:15:00	144	19.2323	X				2009-06-24	21.5979	113.504		20.9155	113.454
2009-05-26 03:30:00	16	-5.37948	0				2009-05-25 07:15:00	164	22.5397	20				2009-06-25	20.9711	113.575		21.0187	113.2
2009-05-26 04:00:00	16	-5.37948	0				2009-05-25 08:15:00	159	21.6992	-5				2009-06-26	21.4233	112.521		20.7727	112.996
2009-05-26 04:30:00	16	-5.37948	0				2009-05-25 09:15:00	164	22.5397	5				2009-06-27	20.8044	112.842		20.23	112.818
2009-05-26 05:00:00	16	-5.37948	0				2009-05-25 10:15:00	145	19.3945	-19				2009-06-28	19.0668	112.539		20.2657	112.615
2009-05-26 05:30:00	16	-5.37948	0				2009-05-25 11:15:00	151	20.3741	6				2009-06-29	18.8843	112.612		19.8229	112.538
2009-05-26 06:00:00	16	-5.37948	X				2009-05-25 12:15:00	164	22.5397	X				2009-06-30	21.1496	112.56		19.5611	112.361
2009-05-26 06:30:00	16	-5.37948	X				2009-05-25 13:15:00	164	22.5397	0				2009-07-01	19.2096	112.134		19.2897	112.235
2009-05-26 07:00:00	17	-10.759	1				2009-05-25 14:15:00	167	23.0489	3				2009-07-02	19.4952	111.96		19.2088	112.31
2009-05-26 07:30:00	17	-10.759	1				2009-05-25 15:15:00	166	22.8787	-1				2009-07-03	17.71	111.911		18.7367	112.262
2009-05-26 08:00:00	17	-10.759	0				2009-05-25 16:15:00	165	22.709	-1				2009-07-04	18.4796	112.988		18.943	112.339
2009-05-26 08:30:00	16	-5.37948	-1				2009-05-25 17:15:00	133	17.4656	-32		17.4656		2009-07-05	18.7891	112.316		19.2461	112.267
2009-05-26 09:00:00	16	-5.37948	-1				2009-05-25 18:15:00	117	14.9402	X				2009-07-06	20.2411	112.52		19.4683	112.297
2009-05-26 09:30:00	16	-5.37948	0				2009-05-25 19:15:00	148	19.8829	31	19.8829			2009-07-07	21.0107	111.601		19.3175	111.978
2009-05-26 10:00:00	16	-5.37948	0				2009-05-25 20:15:00	157	21.3657	9				2009-07-08	18.8208	112.059		18.9303	111.985
2009-05-26 10:30:00	16	-5.37948	0				2009-05-25 21:15:00	125	16.1977	-32		16.1977		2009-07-09	17.7258	111.392		18.4209	111.669
2009-05-26 11:00:00	16	-5.37948	0				2009-05-25 22:15:00	156	21.1996	31	21.1996			2009-07-10	16.853	112.353		18.0702	111.779
2009-05-26 11:30:00	16	-5.37948	0				2009-05-25 23:15:00	163	22.3708	7				2009-07-11	17.6941	110.939		18.2781	111.891
2009-05-26 12:00:00	16	-5.37948	X				2009-05-27	151	20.3741	X				2009-07-12	19.2572	112.153		18.7795	112.155
2009-05-26 12:30:00	16	-5.37948	X				2009-05-27 01:00:00	153	20.7033	2				2009-07-13	19.8602	112.618		19.3413	112.095
2009-05-26 13:00:00	22	-37.6564	6				2009-05-27 02:00:00	135	17.7847	-18				2009-07-14	20.2332	112.711		19.9078	112.288
2009-05-26 13:30:00	16	-5.37948	0				2009-05-27 03:00:00	154	20.8684	19				2009-07-15	19.6619	112.055		20.0967	112.332
2009-05-26 14:00:00	16	-5.37948	-6				2009-05-27 04:00:00	158	21.5323	4				2009-07-16	20.5267	111.901		20.3442	112.453
2009-05-26 14:30:00	16	-5.37948	0				2009-05-27 05:00:00	157	21.3657	-1				2009-07-17	20.2014	112.374		20.057	112.451
2009-05-26 15:00:00	17	-10.759	1				2009-05-27 06:00:00	158	21.5323	X				2009-07-18	21.098	113.224		20.2189	112.726
2009-05-26 15:30:00	16	-5.37948	0				2009-05-27 07:00:00	155	21.0338	-3				2009-07-19	18.797	112.702		20.1951	112.854
2009-05-26 16:00:00	16	-5.37948	-1				2009-05-27 08:00:00	159	21.6992	4				2009-07-20	20.4712	113.431		19.9158	113.008
2009-05-26 16:30:00	18	-16.1384	2				2009-05-27 09:00:00	157	21.3657	-2				2009-07-21	20.4077	112.538		19.2286	113.115
2009-05-26 17:00:00	16	-5.37948	0				2009-05-27 10:00:00	160	21.8665	3				2009-07-22	18.8049	113.147		19.5587	113.148
2009-05-26 17:30:00	16	-5.37948	-2				2009-05-27 11:00:00	160	21.8665	0				2009-07-23	17.6624	113.759		19.4397	113.208
2009-05-26 18:00:00	16	-5.37948	X				2009-05-27 12:00:00	158	21.5323	X				2009-07-25	20.4474	112.864		19.2159	113.321
2009-05-26 18:30:00	16	-5.37948	X				2009-05-27 13:00:00	160	21.8665	2				2009-07-26	19.8761	113.733		19.4127	113.387
2009-05-26 19:00:00	23	-43.0358	7				2009-05-27 14:00:00	174	24.2528	14				2009-07-27	19.2889	113.104		19.2604	113.357
2009-05-26 19:30:00	16	-5.37948	0				2009-05-27 15:00:00	179	25.127	5				2009-07-28	19.7888	113.478		19.2239	113.38
2009-05-26 20:00:00	16	-5.37948	-7				2009-05-27 16:00:00	185	26.1933	6				2009-07-29	16.9006	113.604		19.1271	113.232
2009-05-26 20:30:00	16	-5.37948	0				2009-05-27 17:00:00	184	26.0142	-1				2009-07-30	20.2649	112.983		19.0239	113.286
2009-05-26 21:00:00	16	-5.37948	0				2009-05-27 18:00:00	167	23.0489	X				2009-07-31	19.3921	112.99		18.6335	113.218
2009-05-26 21:30:00	15	0	-1				2009-05-27 19:00:00	154	20.8684	-13				2009-08-01	18.7732	113.374		18.6875	113.102
2009-05-26 22:00:00	16	-5.37948	0				2009-05-27 20:00:00	185	26.1933	31	26.1933			2009-08-02	17.8369	113.136		18.4907	113.064
2009-05-26 22:30:00	16	-5.37948	1				2009-05-27 21:00:00	186	26.3729	1				2009-08-03	17.1704	113.026		18.2781	112.778
2009-05-26 23:00:00	16	-5.37948	0				2009-05-27 22:00:00	162	22.2023	-24				2009-08-04	19.281	112.793		18.4955	112.62
2009-05-26 23:30:00	16	-5.37948	0				2009-05-27 23:00:00	187	26.553	25				2009-08-05	18.3289	111.563		18.3177	112.665
2009-05-27 00:15:00	16	-5.37948	X				2009-05-28 00:30:00	187	26.553	X				2009-08-06	19.8602	112.585		17.7782	112.388
2009-05-27 00:30:00	38	-123.728	X				2009-05-28 00:45:00	187	26.553	X				2009-08-07	16.9482	113.36		17.153	112.313
2009-05-27 01:15:00	15	0	-1				2009-05-28 01:30:00	183	25.8357	-4				2009-08-08	14.4727	111.638		16.8467	112.466
2009-05-27 01:30:00	21	-32.2769	-17				2009-05-28 01:45:00	176	24.601	-11				2009-08-09	16.1548	112.419		15.1788	112.146
2009-05-27 02:15:00	21	-32.2769	6				2009-05-28 02:30:00	153	20.7033	-30				2009-08-10	16.7975	112.327		15.4867	112.08
2009-05-27 02:30:00	20	-26.8974	-1				2009-05-28 02:45:00	144	19.2323	-32		19.2323		2009-08-11	11.521	110.988		14.8329	112.565
2009-05-27 03:15:00	16	-5.37948	-5				2009-05-28 03:30:00	164	22.5397	11				2009-08-12	18.4875	113.026		14.2997	112.679
2009-05-27 03:30:00	16	-5.37948	-4				2009-05-28 03:45:00	140	18.5863	-4				2009-08-13	11.2036	114.067		13.6982	112.72
2009-05-27 04:15:00	16	-5.37948	0				2009-05-28 04:30:00	145	19.3945	-19				2009-08-14	13.4888	112.986		13.6189	113.063
2009-05-27 04:30:00	16	-5.37948	0				2009-05-28 04:45:00	131	17.1475	-9				2009-08-15	13.7903	112.532		11.4766	112.709
2009-05-27 05:15:00	16	-5.37948	0				2009-05-28 05:30:00	162	22.2023	17				2009-08-16	11.1243	112.705		11.8384	112.733
2009-05-27 05:30:00	16	-5.37948	0				2009-05-28 05:45:00	162	22.2023	31	22.2023			2009-08-17	7.77588	111.256		12.7524	112.809
2009-05-27 06:15:00	16	-5.37948	X				2009-05-28 06:30:00	132	17.3065	X				2009-08-18	13.0127	114.185		11.978	113.212
2009-05-27 06:30:00	16	-5.37948	X				2009-05-28 06:45:00	131	17.1475	X				2009-08-19	18.0591	113.365		13.1016	113.493
2009-05-27 07:15:00	16	-5.37948	0				2009-05-28 07:30:00	163	22.3708	31	22.3708			2009-08-20	9.91821	114.548		15.2439	114.001
2009-05-27 07:30:00	16	-5.37948	0				2009-05-28 07:45:00	133	17.4656	2				2009-08-21	16.7419	114.109		16.6912	113.661
2009-05-27 08:15:00	16	-5.37948	0				2009-05-28 08:30:00	131	17.1475	-32		17.1475		2009-08-22	18.4875	113.796		16.4087	113.424
2009-05-27 08:30:00	16	-5.37948	0				2009-05-28 08:45:00	130	16.9887	-3				2009-08-23	20.249	112.486		17.6497	113.213
2009-05-27 09:15:00	16	-5.37948	0				2009-05-28 09:30:00	130	16.9887	-1				2009-08-24	16.6467	112.178		17.2053	113.155
2009-05-27 09:30:00	16	-5.37948	0				2009-05-28 09:45:00	161	22.0342	31	22.0342			2009-08-25	16.123	113.497		16.1738	113.299
2009-05-27 10:15:00	16	-5.37948	0				2009-05-28 10:30:00	123	15.8825	-7				2009-08-26	14.5203	113.818		14.6472	113.67
2009-05-27 10:30:00	16	-5.37948	0				2009-05-28 10:45:00	129	16.8301	-32		16.8301		2009-08-27	13.3301	114.516		10.6831	114.068
2009-05-27 11:15:00	16	-5.37948	0				2009-05-28 11:30:00	154	20.8684	31	20.8684			2009-08-28	12.616	114.341		9.00732	114.042
2009-05-27 11:30:00	16	-5.37948	0				2009-05-28 11:45:00	160	21.8665	31	21.8665			2009-08-29	-3.17383	114.167		10.3276	113.894
2009-05-27 12:15:00	16	-5.37948	X				2009-05-28 12:30:00	121	15.5678	X				2009-08-30	7.74414	113.37		11.5464	113.622
2009-05-27 12:30:00	16	-5.37948	X				2009-05-28 12:45:00	126	16.3555	X				2009-08-31	21.1218	113.075		12.124	113.927
2009-05-27 13:15:00	18	-16.1384	2				2009-05-28 13:30:00	152	20.5385	31	20.5385			2009-09-01	19.4238	113.157		15.6978	113.933
2009-05-27 13:30:00	19	-21.5179	3				2009-05-28 13:45:00	157	21.3657	31	21.3657			2009-09-02	15.5042	115.865		19.9189	114.341
2009-05-27 14:15:00	16	-5.37948	-2				2009-05-28 14:30:00	127	16.5136	-25				2009-09-03	14.6948	114.199		18.5447	114.543
2009-05-27 14:30:00	16	-5.37948	-3				2009-05-28 14:45:00	187	26.553	30				2009-09-04	28.8501	115.41		17.821	114.871
2009-05-27 15:15:00	16	-5.37948	0				2009-05-28 15:30:00	158	21.5323	31	21.5323			2009-09-06	14.2505	114.084		18.2114	114.701
2009-05-27 15:30:00	16	-5.37948	0				2009-05-28 15:45:00	178	24.9512	-9				2009-09-07	15.8057	114.798		10.6641	115.007
2009-05-27 16:15:00	16	-5.37948	0				2009-05-28 16:30:00	184	26.0142	26				2009-09-08	17.4561	115.013		8.57568	115.039
2009-05-27 16:30:00	16	-5.37948	0				2009-05-28 16:45:00	178	24.9512	0				2009-09-09	-23.042	115.729		9.21045	115.205
2009-05-27 17:15:00	17	-10.759	1				2009-05-28 17:30:00	177	24.7758	-7				2009-09-10	18.4082	115.571		10.1626	114.946
2009-05-27 17:30:00	16	-5.37948	0				2009-05-28 17:45:00	175	24.4266	-3				2009-09-11	17.4243	114.913		7.09033	115.239
2009-05-27 18:15:00	16	-5.37948	X				2009-05-28 18:30:00	140	18.5863	X				2009-09-12	20.5664	113.506		14.6567	115.056
2009-05-27 18:30:00	16	-5.37948	X				2009-05-28 18:45:00	184	26.0142	X				2009-09-13	2.09473	116.474		12.2573	115.074
2009-05-27 19:15:00	16	-5.37948	0				2009-05-28 19:30:00	171	23.7341	31	23.7341			2009-09-14	14.79	114.818		7.3252	115.243
2009-05-27 19:30:00	16	-5.37948	0				2009-05-28 19:45:00	168	23.2195	-16				2009-09-15	6.41113	115.662		6.99512	115.462
2009-05-27 20:15:00	16	-5.37948	0				2009-05-28 20:30:00	177	24.7758	6				2009-09-16	-7.23633	115.756		3.02148	115.281
2009-05-27 20:30:00	16	-5.37948	0				2009-05-28 20:45:00	162	22.2023	-6				2009-09-17	18.916	114.6		-8.81055	115.625
2009-05-27 21:15:00	16	-5.37948	0				2009-05-28 21:30:00	145	19.3945	-32		19.3945		2009-09-18	-17.7734	115.569		-13.749	115.844
2009-05-27 21:30:00	16	-5.37948	0				2009-05-28 21:45:00	163	22.3708	1				2009-09-19	-44.3701	116.538		-14.7561	116.113
2009-05-27 22:15:00	16	-5.37948	0				2009-05-28 22:30:00	140	18.5863	-5				2009-09-20	-18.2812	116.757		-20.0573	116.281
2009-05-27 22:30:00	16	-5.37948	0				2009-05-28 22:45:00	131	17.1475	-32		17.1475		2009-09-21	-12.2716	117.1		-17.0935	116.7
2009-05-27 23:15:00	16	-5.37948	0				2009-05-28 23:30:00	171	23.7341	31	23.7341			2009-09-22	-7.5902	115.443		-7.88612	116.343
2009-05-27 23:30:00	16	-5.37948	0				2009-05-28 23:45:00	162	22.2023	31	22.2023			2009-09-23	-2.95411	117.66		-2.96971	115.935
2009-05-30 00:45:00	20	-26.8974	X				2009-05-29 00:15:00	172	23.9065	X				2009-09-24	1.66658	114.752		1.68026	115.201
2009-05-30 01:45:00	16	-5.37948	-4				2009-05-29 01:15:00	174	24.2528	2				2009-09-25	6.3008	114.718		6.34453	115.167
2009-05-30 02:45:00	19	-21.5179	3				2009-05-29 02:15:00	162	22.2023	-12				2009-09-26	10.9782	113.433		11.0547	114.657
2009-05-30 03:45:00	19	-21.5179	0				2009-05-29 03:15:00	159	21.6992	-3				2009-09-27	15.7312	115.272		15.8455	114.521
2009-05-30 04:45:00	17	-10.759	-2				2009-05-29 04:15:00	170	23.5621	11				2009-09-28	20.5967	115.11		20.7575	115.084
2009-05-30 05:45:00	17	-10.759	0				2009-05-29 05:15:00	179	25.127	9				2009-09-29	25.6204	114.072		25.0618	115.221
2009-05-30 06:45:00	21	-32.2769	X				2009-05-29 06:15:00	173	24.0794	X				2009-09-30	30.8608	117.533		30.3869	115.057
2009-05-30 07:45:00	18	-16.1384	-3				2009-05-29 07:15:00	161	22.0342	-12				2009-10-01	32.5	114.117		37.5694	115.282
2009-05-30 08:45:00	20	-26.8974	2				2009-05-29 08:15:00	150	20.2101	-11				2009-10-02	42.3568	114.45		45.4453	115.48
2009-05-30 09:45:00	17	-10.759	-3				2009-05-29 09:15:00	163	22.3708	13				2009-10-04	56.509	116.236		49.0914	114.967
2009-05-30 10:45:00	17	-10.759	0				2009-05-29 10:15:00	160	21.8665	-3				2009-10-05	65	115.064		54.6219	115.25
2009-05-30 11:45:00	16	-5.37948	-1				2009-05-29 11:15:00	157	21.3657	-3
2009-05-30 12:45:00	19	-21.5179	X				2009-05-29 12:15:00	173	24.0794	X
2009-05-30 13:45:00	16	-5.37948	-3				2009-05-29 13:15:00	150	20.2101	-23
2009-05-30 14:45:00	16	-5.37948	0				2009-05-29 14:15:00	159	21.6992	9
2009-05-30 15:45:00	16	-5.37948	0				2009-05-29 15:15:00	127	16.5136	-32		16.5136
2009-05-30 16:45:00	16	-5.37948	0				2009-05-29 16:15:00	158	21.5323	31	21.5323
2009-05-30 17:45:00	16	-5.37948	0				2009-05-29 17:15:00	185	26.1933	27
2009-05-30 18:45:00	16	-5.37948	X				2009-05-29 18:15:00	185	26.1933	X
2009-05-30 19:45:00	16	-5.37948	0				2009-05-29 19:15:00	186	26.3729	1
2009-05-30 20:45:00	16	-5.37948	0				2009-05-29 20:15:00	186	26.3729	0
2009-05-30 21:45:00	16	-5.37948	0				2009-05-29 21:15:00	154	20.8684	-32		20.8684
2009-05-30 22:45:00	16	-5.37948	0				2009-05-29 22:15:00	179	25.127	25
2009-05-30 23:45:00	16	-5.37948	0				2009-05-29 23:15:00	175	24.4266	-4
2009-05-31	16	-5.37948	X				2009-05-30	182	25.6577	X
2009-05-31 00:30:00	16	-5.37948	X				2009-05-30 00:45:00	171	23.7341	X
2009-05-31 01:00:00	16	-5.37948	0				2009-05-30 01:00:00	174	24.2528	-8
2009-05-31 01:30:00	16	-5.37948	0				2009-05-30 01:45:00	168	23.2195	-3
2009-05-31 02:00:00	16	-5.37948	0				2009-05-30 02:00:00	179	25.127	5
2009-05-31 02:30:00	16	-5.37948	0				2009-05-30 02:45:00	165	22.709	-3
2009-05-31 03:00:00	16	-5.37948	0				2009-05-30 03:00:00	168	23.2195	-11
2009-05-31 03:30:00	16	-5.37948	0				2009-05-30 03:45:00	162	22.2023	-3
2009-05-31 04:00:00	16	-5.37948	0				2009-05-30 04:00:00	161	22.0342	-7
2009-05-31 04:30:00	16	-5.37948	0				2009-05-30 04:45:00	180	25.3034	18
2009-05-31 05:00:00	16	-5.37948	0				2009-05-30 05:00:00	179	25.127	18
2009-05-31 05:30:00	16	-5.37948	0				2009-05-30 05:45:00	180	25.3034	0
2009-05-31 06:00:00	16	-5.37948	X				2009-05-30 06:00:00	170	23.5621	X
2009-05-31 06:30:00	16	-5.37948	X				2009-05-30 06:45:00	146	19.557	X
2009-05-31 07:00:00	16	-5.37948	0				2009-05-30 07:00:00	145	19.3945	-25
2009-05-31 07:30:00	16	-5.37948	0				2009-05-30 07:45:00	149	20.0463	3
2009-05-31 08:00:00	16	-5.37948	0				2009-05-30 08:00:00	158	21.5323	13
2009-05-31 08:30:00	16	-5.37948	0				2009-05-30 08:45:00	156	21.1996	7
2009-05-31 09:00:00	16	-5.37948	0				2009-05-30 09:00:00	180	25.3034	22
2009-05-31 09:30:00	16	-5.37948	0				2009-05-30 09:45:00	166	22.8787	10
2009-05-31 10:00:00	16	-5.37948	0				2009-05-30 10:00:00	177	24.7758	-3
2009-05-31 10:30:00	16	-5.37948	0				2009-05-30 10:45:00	184	26.0142	18
2009-05-31 11:00:00	16	-5.37948	0				2009-05-30 11:00:00	167	23.0489	-10
2009-05-31 11:30:00	26	-59.1743	10				2009-05-30 11:45:00	184	26.0142	0
2009-05-31 12:00:00	16	-5.37948	X				2009-05-30 12:00:00	162	22.2023	X
2009-05-31 12:30:00	21	-32.2769	X				2009-05-30 12:45:00	180	25.3034	X
2009-05-31 13:00:00	16	-5.37948	0				2009-05-30 13:00:00	184	26.0142	22
2009-05-31 13:30:00	52	-199.041	31	-199.041			2009-05-30 13:45:00	182	25.6577	2
2009-05-31 14:00:00	16	-5.37948	0				2009-05-30 14:00:00	184	26.0142	0
2009-05-31 14:30:00	20	-26.8974	-32		-26.8974		2009-05-30 14:45:00	183	25.8357	1
2009-05-31 15:00:00	16	-5.37948	0				2009-05-30 15:00:00	183	25.8357	-1
2009-05-31 15:30:00	16	-5.37948	-4				2009-05-30 15:45:00	183	25.8357	0
2009-05-31 16:00:00	16	-5.37948	0				2009-05-30 16:00:00	182	25.6577	-1
2009-05-31 16:30:00	16	-5.37948	0				2009-05-30 16:45:00	182	25.6577	-1
2009-05-31 17:00:00	16	-5.37948	0				2009-05-30 17:00:00	182	25.6577	0
2009-05-31 17:30:00	16	-5.37948	0				2009-05-30 17:45:00	182	25.6577	0
2009-05-31 18:00:00	16	-5.37948	X				2009-05-30 18:00:00	182	25.6577	X
2009-05-31 18:30:00	16	-5.37948	X				2009-05-30 18:45:00	165	22.709	X
2009-05-31 19:00:00	16	-5.37948	0				2009-05-30 19:00:00	181	25.4803	-1
2009-05-31 19:30:00	16	-5.37948	0				2009-05-30 19:45:00	180	25.3034	15
2009-05-31 20:00:00	16	-5.37948	0				2009-05-30 20:00:00	180	25.3034	-1
2009-05-31 20:30:00	16	-5.37948	0				2009-05-30 20:45:00	175	24.4266	-5
2009-05-31 21:00:00	16	-5.37948	0				2009-05-30 21:00:00	171	23.7341	-9
2009-05-31 21:30:00	16	-5.37948	0				2009-05-30 21:45:00	176	24.601	1
2009-05-31 22:00:00	16	-5.37948	0				2009-05-30 22:00:00	176	24.601	5
2009-05-31 22:30:00	21	-32.2769	5				2009-05-30 22:45:00	178	24.9512	2
2009-05-31 23:00:00	16	-5.37948	0				2009-05-30 23:00:00	168	23.2195	-8
2009-05-31 23:30:00	16	-5.37948	-5				2009-05-30 23:45:00	175	24.4266	-3
2009-06-01	16	-5.37948	X				2009-05-31 00:30:00	167	23.0489	X
2009-06-01 00:15:00	16	-5.37948	X				2009-05-31 01:30:00	171	23.7341	4
2009-06-01 01:00:00	16	-5.37948	0				2009-05-31 02:30:00	167	23.0489	-4
2009-06-01 01:15:00	16	-5.37948	0				2009-05-31 03:30:00	165	22.709	-2
2009-06-01 02:00:00	16	-5.37948	0				2009-05-31 04:30:00	162	22.2023	-3
2009-06-01 02:15:00	17	-10.759	1				2009-05-31 05:30:00	159	21.6992	-3
2009-06-01 03:00:00	16	-5.37948	0				2009-05-31 06:30:00	155	21.0338	X
2009-06-01 03:15:00	16	-5.37948	-1				2009-05-31 07:30:00	154	20.8684	-1
2009-06-01 04:00:00	17	-10.759	1				2009-05-31 08:30:00	154	20.8684	0
2009-06-01 04:15:00	16	-5.37948	0				2009-05-31 09:30:00	154	20.8684	0
2009-06-01 05:00:00	21	-32.2769	4				2009-05-31 10:30:00	151	20.3741	-3
2009-06-01 05:15:00	16	-5.37948	0				2009-05-31 11:30:00	139	18.4255	-12
2009-06-01 06:00:00	18	-16.1384	X				2009-05-31 12:30:00	143	19.0704	X
2009-06-01 06:15:00	16	-5.37948	X				2009-05-31 13:30:00	111	14.0019	-32		14.0019
2009-06-01 07:00:00	19	-21.5179	1				2009-05-31 14:30:00	142	18.9088	31	18.9088
2009-06-01 07:15:00	20	-26.8974	4				2009-05-31 15:30:00	147	19.7198	5
2009-06-01 08:00:00	17	-10.759	-2				2009-05-31 16:30:00	149	20.0463	2
2009-06-01 08:15:00	16	-5.37948	-4				2009-05-31 17:30:00	151	20.3741	2
2009-06-01 09:00:00	20	-26.8974	3				2009-05-31 18:30:00	154	20.8684	X
2009-06-01 09:15:00	19	-21.5179	3				2009-05-31 19:30:00	157	21.3657	3
2009-06-01 10:00:00	18	-16.1384	-2				2009-05-31 20:30:00	159	21.6992	2
2009-06-01 10:15:00	17	-10.759	-2				2009-05-31 21:30:00	159	21.6992	0
2009-06-01 11:00:00	19	-21.5179	1				2009-05-31 22:30:00	159	21.6992	0
2009-06-01 11:15:00	16	-5.37948	-1				2009-05-31 23:30:00	160	21.8665	1
2009-06-01 12:00:00	18	-16.1384	X				2009-06-01 00:30:00	159	21.6992	X
2009-06-01 12:15:00	16	-5.37948	X				2009-06-01 01:30:00	159	21.6992	0
2009-06-01 13:00:00	16	-5.37948	-2				2009-06-01 02:30:00	159	21.6992	0
2009-06-01 13:15:00	20	-26.8974	4				2009-06-01 03:30:00	152	20.5385	-7
2009-06-01 14:00:00	17	-10.759	1				2009-06-01 04:30:00	151	20.3741	-1
2009-06-01 14:15:00	18	-16.1384	-2				2009-06-01 05:30:00	146	19.557	-5
2009-06-01 15:00:00	17	-10.759	0				2009-06-01 06:30:00	147	19.7198	X
2009-06-01 15:15:00	19	-21.5179	1				2009-06-01 07:30:00	144	19.2323	-3
2009-06-01 16:00:00	16	-5.37948	-1				2009-06-01 08:30:00	145	19.3945	1
2009-06-01 16:15:00	16	-5.37948	-3				2009-06-01 09:30:00	145	19.3945	0
2009-06-01 17:00:00	16	-5.37948	0				2009-06-01 10:30:00	146	19.557	1
2009-06-01 17:15:00	16	-5.37948	0				2009-06-01 11:30:00	145	19.3945	-1
2009-06-01 18:00:00	16	-5.37948	X				2009-06-01 12:30:00	142	18.9088	X
2009-06-01 18:15:00	16	-5.37948	X				2009-06-01 13:30:00	129	16.8301	-13
2009-06-01 19:00:00	17	-10.759	1				2009-06-01 14:30:00	145	19.3945	16
2009-06-01 19:15:00	16	-5.37948	0				2009-06-01 15:30:00	146	19.557	1
2009-06-01 20:00:00	17	-10.759	0				2009-06-01 16:30:00	139	18.4255	-7
2009-06-01 20:15:00	18	-16.1384	2				2009-06-01 17:30:00	142	18.9088	3
2009-06-01 21:00:00	19	-21.5179	2				2009-06-01 18:30:00	150	20.2101	X
2009-06-01 21:15:00	17	-10.759	-1				2009-06-01 19:30:00	147	19.7198	-3
2009-06-01 22:00:00	18	-16.1384	-1				2009-06-01 20:30:00	133	17.4656	-14
2009-06-01 22:15:00	18	-16.1384	1				2009-06-01 21:30:00	146	19.557	13
2009-06-01 23:00:00	18	-16.1384	0				2009-06-01 22:30:00	125	16.1977	-21
2009-06-01 23:15:00	23	-43.0358	5				2009-06-01 23:30:00	123	15.8825	-2
2009-06-02 00:30:00	26	-59.1743	X				2009-06-02 00:15:00	135	17.7847	X
2009-06-02 01:30:00	24	-48.4153	-2				2009-06-02 01:15:00	149	20.0463	14
2009-06-02 02:30:00	17	-10.759	-7				2009-06-02 02:15:00	147	19.7198	-2
2009-06-02 03:30:00	17	-10.759	0				2009-06-02 03:15:00	151	20.3741	4
2009-06-02 04:30:00	16	-5.37948	-1				2009-06-02 04:15:00	150	20.2101	-1
2009-06-02 05:30:00	16	-5.37948	0				2009-06-02 05:15:00	150	20.2101	0
2009-06-02 06:30:00	17	-10.759	X				2009-06-02 06:15:00	150	20.2101	X
2009-06-02 07:30:00	19	-21.5179	2				2009-06-02 07:15:00	150	20.2101	0
2009-06-02 08:30:00	16	-5.37948	-3				2009-06-02 08:15:00	151	20.3741	1
2009-06-02 09:30:00	17	-10.759	1				2009-06-02 09:15:00	152	20.5385	1
2009-06-02 10:30:00	17	-10.759	0				2009-06-02 10:15:00	151	20.3741	-1
2009-06-02 11:30:00	19	-21.5179	2				2009-06-02 11:15:00	144	19.2323	-7
2009-06-02 12:30:00	17	-10.759	X				2009-06-02 12:15:00	153	20.7033	X
2009-06-02 13:30:00	16	-5.37948	-1				2009-06-02 13:15:00	152	20.5385	-1
2009-06-02 14:30:00	27	-64.5538	11				2009-06-02 14:15:00	153	20.7033	1
2009-06-02 15:30:00	16	-5.37948	-11				2009-06-02 15:15:00	139	18.4255	-14
2009-06-02 16:30:00	16	-5.37948	0				2009-06-02 16:15:00	153	20.7033	14
2009-06-02 17:30:00	16	-5.37948	0				2009-06-02 17:15:00	156	21.1996	3
2009-06-02 18:30:00	16	-5.37948	X				2009-06-02 18:15:00	156	21.1996	X
2009-06-02 19:30:00	16	-5.37948	0				2009-06-02 19:15:00	155	21.0338	-1
2009-06-02 20:30:00	16	-5.37948	0				2009-06-02 20:15:00	156	21.1996	1
2009-06-02 21:30:00	21	-32.2769	5				2009-06-02 21:15:00	154	20.8684	-2
2009-06-02 22:30:00	16	-5.37948	-5				2009-06-02 22:15:00	153	20.7033	-1
2009-06-02 23:30:00	23	-43.0358	7				2009-06-02 23:15:00	156	21.1996	3
2009-06-04	27	-64.5538	X				2009-06-06 00:15:00	161	22.0342	X
2009-06-04 00:45:00	17	-10.759	X				2009-06-06 00:45:00	133	17.4656	X
2009-06-04 01:00:00	24	-48.4153	-3				2009-06-06 01:15:00	157	21.3657	-4
2009-06-04 01:45:00	21	-32.2769	4				2009-06-06 01:45:00	137	18.1046	4
2009-06-04 02:00:00	18	-16.1384	-6				2009-06-06 02:15:00	153	20.7033	-4
2009-06-04 02:45:00	16	-5.37948	-5				2009-06-06 02:45:00	149	20.0463	12
2009-06-04 03:00:00	16	-5.37948	-2				2009-06-06 03:15:00	145	19.3945	-8
2009-06-04 03:45:00	17	-10.759	1				2009-06-06 03:45:00	148	19.8829	-1
2009-06-04 04:00:00	16	-5.37948	0				2009-06-06 04:15:00	149	20.0463	4
2009-06-04 04:45:00	17	-10.759	0				2009-06-06 04:45:00	160	21.8665	12
2009-06-04 05:00:00	16	-5.37948	0				2009-06-06 05:15:00	161	22.0342	12
2009-06-04 05:45:00	17	-10.759	0				2009-06-06 05:45:00	160	21.8665	0
2009-06-04 06:00:00	18	-16.1384	X				2009-06-06 06:15:00	161	22.0342	X
2009-06-04 06:45:00	19	-21.5179	X				2009-06-06 06:45:00	161	22.0342	X
2009-06-04 07:00:00	18	-16.1384	0				2009-06-06 07:15:00	161	22.0342	0
2009-06-04 07:45:00	20	-26.8974	1				2009-06-06 07:45:00	161	22.0342	0
2009-06-04 08:00:00	19	-21.5179	1				2009-06-06 08:15:00	161	22.0342	0
2009-06-04 08:45:00	19	-21.5179	-1				2009-06-06 08:45:00	161	22.0342	0
2009-06-04 09:00:00	20	-26.8974	1				2009-06-06 09:15:00	152	20.5385	-9
2009-06-04 09:45:00	16	-5.37948	-3				2009-06-06 09:45:00	160	21.8665	-1
2009-06-04 10:00:00	16	-5.37948	-4				2009-06-06 10:15:00	161	22.0342	9
2009-06-04 10:45:00	17	-10.759	1				2009-06-06 10:45:00	159	21.6992	-1
2009-06-04 11:00:00	16	-5.37948	0				2009-06-06 11:15:00	160	21.8665	-1
2009-06-04 11:45:00	16	-5.37948	-1				2009-06-06 11:45:00	158	21.5323	-1
2009-06-04 12:00:00	16	-5.37948	X				2009-06-06 12:15:00	160	21.8665	X
2009-06-04 12:45:00	17	-10.759	X				2009-06-06 12:45:00	160	21.8665	X
2009-06-04 13:00:00	17	-10.759	1				2009-06-06 13:15:00	161	22.0342	1
2009-06-04 13:45:00	16	-5.37948	-1				2009-06-06 13:45:00	147	19.7198	-13
2009-06-04 14:00:00	16	-5.37948	-1				2009-06-06 14:15:00	159	21.6992	-2
2009-06-04 14:45:00	21	-32.2769	5				2009-06-06 14:45:00	158	21.5323	11
2009-06-04 15:00:00	21	-32.2769	5				2009-06-06 15:15:00	160	21.8665	1
2009-06-04 15:45:00	21	-32.2769	0				2009-06-06 15:45:00	127	16.5136	-31
2009-06-04 16:00:00	20	-26.8974	-1				2009-06-06 16:15:00	155	21.0338	-5
2009-06-04 16:45:00	16	-5.37948	-5				2009-06-06 16:45:00	156	21.1996	29
2009-06-04 17:00:00	16	-5.37948	-4				2009-06-06 17:15:00	157	21.3657	2
2009-06-04 17:45:00	17	-10.759	1				2009-06-06 17:45:00	160	21.8665	4
2009-06-04 18:00:00	17	-10.759	X				2009-06-06 18:15:00	163	22.3708	X
2009-06-04 18:45:00	17	-10.759	X				2009-06-06 18:45:00	163	22.3708	X
2009-06-04 19:00:00	18	-16.1384	1				2009-06-06 19:15:00	163	22.3708	0
2009-06-04 19:45:00	17	-10.759	0				2009-06-06 19:45:00	164	22.5397	1
2009-06-04 20:00:00	17	-10.759	-1				2009-06-06 20:15:00	164	22.5397	1
2009-06-04 20:45:00	17	-10.759	0				2009-06-06 20:45:00	163	22.3708	-1
2009-06-04 21:00:00	24	-48.4153	7				2009-06-06 21:15:00	162	22.2023	-2
2009-06-04 21:45:00	24	-48.4153	7				2009-06-06 21:45:00	163	22.3708	0
2009-06-04 22:00:00	17	-10.759	-7				2009-06-06 22:15:00	163	22.3708	1
2009-06-04 22:45:00	17	-10.759	-7				2009-06-06 22:45:00	162	22.2023	-1
2009-06-04 23:00:00	32	-91.4512	15				2009-06-06 23:15:00	161	22.0342	-2
2009-06-04 23:45:00	18	-16.1384	1				2009-06-06 23:45:00	162	22.2023	0
2009-06-05 00:45:00	17	-10.759	X				2009-06-07 00:15:00	161	22.0342	X
2009-06-05 01:45:00	24	-48.4153	7				2009-06-07 00:30:00	161	22.0342	X
2009-06-05 02:45:00	16	-5.37948	-8				2009-06-07 00:45:00	111	14.0019	X
2009-06-05 03:45:00	17	-10.759	1				2009-06-07 01:15:00	162	22.2023	1
2009-06-05 04:45:00	16	-5.37948	-1				2009-06-07 01:30:00	159	21.6992	-2
2009-06-05 05:45:00	16	-5.37948	0				2009-06-07 01:45:00	128	16.6718	17
2009-06-05 06:45:00	16	-5.37948	X				2009-06-07 02:15:00	130	16.9887	-32		16.9887
2009-06-05 07:45:00	16	-5.37948	0				2009-06-07 02:30:00	157	21.3657	-2
2009-06-05 08:45:00	16	-5.37948	0				2009-06-07 02:45:00	157	21.3657	29
2009-06-05 09:45:00	16	-5.37948	0				2009-06-07 03:15:00	154	20.8684	24
2009-06-05 10:45:00	16	-5.37948	0				2009-06-07 03:30:00	154	20.8684	-3
2009-06-05 11:45:00	16	-5.37948	0				2009-06-07 03:45:00	152	20.5385	-5
2009-06-05 12:45:00	16	-5.37948	X				2009-06-07 04:15:00	150	20.2101	-4
2009-06-05 13:45:00	16	-5.37948	0				2009-06-07 04:30:00	155	21.0338	1
2009-06-05 14:45:00	16	-5.37948	0				2009-06-07 04:45:00	149	20.0463	-3
2009-06-05 15:45:00	18	-16.1384	2				2009-06-07 05:15:00	151	20.3741	1
2009-06-05 16:45:00	16	-5.37948	-2				2009-06-07 05:30:00	149	20.0463	-6
2009-06-05 17:45:00	16	-5.37948	0				2009-06-07 05:45:00	162	22.2023	13
2009-06-05 18:45:00	22	-37.6564	X				2009-06-07 06:15:00	163	22.3708	X
2009-06-05 19:45:00	18	-16.1384	-4				2009-06-07 06:30:00	156	21.1996	X
2009-06-05 20:45:00	16	-5.37948	-2				2009-06-07 06:45:00	161	22.0342	X
2009-06-05 21:45:00	23	-43.0358	7				2009-06-07 07:15:00	162	22.2023	-1
2009-06-05 22:45:00	17	-10.759	-6				2009-06-07 07:30:00	147	19.7198	-9
2009-06-05 23:45:00	19	-21.5179	2				2009-06-07 07:45:00	145	19.3945	-16
2009-06-07	17	-10.759	X				2009-06-07 08:15:00	161	22.0342	-1
2009-06-07 01:00:00	20	-26.8974	3				2009-06-07 08:30:00	138	18.2649	-9
2009-06-07 02:00:00	17	-10.759	-3				2009-06-07 08:45:00	160	21.8665	15
2009-06-07 03:00:00	19	-21.5179	2				2009-06-07 09:15:00	154	20.8684	-7
2009-06-07 04:00:00	19	-21.5179	0				2009-06-07 09:30:00	157	21.3657	19
2009-06-07 05:00:00	19	-21.5179	0				2009-06-07 09:45:00	153	20.7033	-7
2009-06-07 06:00:00	17	-10.759	X				2009-06-07 10:15:00	158	21.5323	4
2009-06-07 07:00:00	17	-10.759	0				2009-06-07 10:30:00	147	19.7198	-10
2009-06-07 08:00:00	18	-16.1384	1				2009-06-07 10:45:00	150	20.2101	-3
2009-06-07 09:00:00	20	-26.8974	2				2009-06-07 11:15:00	154	20.8684	-4
2009-06-07 10:00:00	16	-5.37948	-4				2009-06-07 11:30:00	148	19.8829	1
2009-06-07 11:00:00	20	-26.8974	4				2009-06-07 11:45:00	157	21.3657	7
2009-06-07 12:00:00	19	-21.5179	X				2009-06-07 12:15:00	159	21.6992	X
2009-06-07 13:00:00	17	-10.759	-2				2009-06-07 12:30:00	156	21.1996	X
2009-06-07 14:00:00	17	-10.759	0				2009-06-07 12:45:00	160	21.8665	X
2009-06-07 15:00:00	17	-10.759	0				2009-06-07 13:15:00	160	21.8665	1
2009-06-07 16:00:00	17	-10.759	0				2009-06-07 13:30:00	160	21.8665	4
2009-06-07 17:00:00	17	-10.759	0				2009-06-07 13:45:00	160	21.8665	0
2009-06-07 18:00:00	16	-5.37948	X				2009-06-07 14:15:00	160	21.8665	0
2009-06-07 19:00:00	16	-5.37948	0				2009-06-07 14:30:00	160	21.8665	0
2009-06-07 20:00:00	16	-5.37948	0				2009-06-07 14:45:00	160	21.8665	0
2009-06-07 21:00:00	16	-5.37948	0				2009-06-07 15:15:00	160	21.8665	0
2009-06-07 22:00:00	23	-43.0358	7				2009-06-07 15:30:00	160	21.8665	0
2009-06-07 23:00:00	26	-59.1743	3				2009-06-07 15:45:00	160	21.8665	0
2009-06-08	21	-32.2769	X				2009-06-07 16:15:00	160	21.8665	0
2009-06-08 00:15:00	18	-16.1384	X				2009-06-07 16:30:00	160	21.8665	0
2009-06-08 00:45:00	16	-5.37948	X				2009-06-07 16:45:00	160	21.8665	0
2009-06-08 01:00:00	31	-86.0717	10				2009-06-07 17:15:00	159	21.6992	-1
2009-06-08 01:15:00	16	-5.37948	-2				2009-06-07 17:30:00	161	22.0342	1
2009-06-08 01:45:00	27	-64.5538	11				2009-06-07 17:45:00	161	22.0342	1
2009-06-08 02:00:00	17	-10.759	-14				2009-06-07 18:15:00	162	22.2023	X
2009-06-08 02:15:00	16	-5.37948	0				2009-06-07 18:30:00	162	22.2023	X
2009-06-08 02:45:00	18	-16.1384	-9				2009-06-07 18:45:00	162	22.2023	X
2009-06-08 03:00:00	18	-16.1384	1				2009-06-07 19:15:00	162	22.2023	0
2009-06-08 03:15:00	20	-26.8974	4				2009-06-07 19:30:00	162	22.2023	0
2009-06-08 03:45:00	20	-26.8974	2				2009-06-07 19:45:00	162	22.2023	0
2009-06-08 04:00:00	17	-10.759	-1				2009-06-07 20:15:00	161	22.0342	-1
2009-06-08 04:15:00	19	-21.5179	-1				2009-06-07 20:30:00	162	22.2023	0
2009-06-08 04:45:00	19	-21.5179	-1				2009-06-07 20:45:00	161	22.0342	-1
2009-06-08 05:00:00	18	-16.1384	1				2009-06-07 21:15:00	162	22.2023	1
2009-06-08 05:15:00	17	-10.759	-2				2009-06-07 21:30:00	162	22.2023	0
2009-06-08 05:45:00	18	-16.1384	-1				2009-06-07 21:45:00	161	22.0342	0
2009-06-08 06:00:00	18	-16.1384	X				2009-06-07 22:15:00	150	20.2101	-12
2009-06-08 06:15:00	18	-16.1384	X				2009-06-07 22:30:00	162	22.2023	0
2009-06-08 06:45:00	21	-32.2769	X				2009-06-07 22:45:00	162	22.2023	1
2009-06-08 07:00:00	18	-16.1384	0				2009-06-07 23:15:00	159	21.6992	9
2009-06-08 07:15:00	17	-10.759	-1				2009-06-07 23:30:00	162	22.2023	0
2009-06-08 07:45:00	18	-16.1384	-3				2009-06-07 23:45:00	161	22.0342	-1
2009-06-08 08:00:00	16	-5.37948	-2				2009-06-08 00:15:00	130	16.9887	X
2009-06-08 08:15:00	17	-10.759	0				2009-06-08 01:15:00	161	22.0342	31	22.0342
2009-06-08 08:45:00	20	-26.8974	2				2009-06-08 02:15:00	161	22.0342	0
2009-06-08 09:00:00	20	-26.8974	4				2009-06-08 03:15:00	155	21.0338	-6
2009-06-08 09:15:00	18	-16.1384	1				2009-06-08 04:15:00	162	22.2023	7
2009-06-08 09:45:00	16	-5.37948	-4				2009-06-08 05:15:00	163	22.3708	1
2009-06-08 10:00:00	16	-5.37948	-4				2009-06-08 06:15:00	163	22.3708	X
2009-06-08 10:15:00	16	-5.37948	-2				2009-06-08 07:15:00	152	20.5385	-11
2009-06-08 10:45:00	21	-32.2769	5				2009-06-08 08:15:00	162	22.2023	10
2009-06-08 11:00:00	17	-10.759	1				2009-06-08 09:15:00	163	22.3708	1
2009-06-08 11:15:00	18	-16.1384	2				2009-06-08 10:15:00	163	22.3708	0
2009-06-08 11:45:00	22	-37.6564	1				2009-06-08 11:15:00	147	19.7198	-16
2009-06-08 12:00:00	20	-26.8974	X				2009-06-08 12:15:00	161	22.0342	X
2009-06-08 12:15:00	17	-10.759	X				2009-06-08 13:15:00	161	22.0342	0
2009-06-08 12:45:00	18	-16.1384	X				2009-06-08 14:15:00	161	22.0342	0
2009-06-08 13:00:00	17	-10.759	-3				2009-06-08 15:15:00	161	22.0342	0
2009-06-08 13:15:00	16	-5.37948	-1				2009-06-08 16:15:00	162	22.2023	1
2009-06-08 13:45:00	17	-10.759	-1				2009-06-08 17:15:00	163	22.3708	1
2009-06-08 14:00:00	16	-5.37948	-1				2009-06-08 18:15:00	163	22.3708	X
2009-06-08 14:15:00	16	-5.37948	0				2009-06-08 19:15:00	163	22.3708	0
2009-06-08 14:45:00	16	-5.37948	-1				2009-06-08 20:15:00	163	22.3708	0
2009-06-08 15:00:00	16	-5.37948	0				2009-06-08 21:15:00	149	20.0463	-14
2009-06-08 15:15:00	16	-5.37948	0				2009-06-08 22:15:00	164	22.5397	15
2009-06-08 15:45:00	18	-16.1384	2				2009-06-08 23:15:00	160	21.8665	-4
2009-06-08 16:00:00	16	-5.37948	0				2009-06-09 00:30:00	165	22.709	X
2009-06-08 16:15:00	16	-5.37948	0				2009-06-09 01:30:00	162	22.2023	-3
2009-06-08 16:45:00	16	-5.37948	-2				2009-06-09 02:30:00	164	22.5397	2
2009-06-08 17:00:00	16	-5.37948	0				2009-06-09 03:30:00	164	22.5397	0
2009-06-08 17:15:00	16	-5.37948	0				2009-06-09 04:30:00	158	21.5323	-6
2009-06-08 17:45:00	16	-5.37948	0				2009-06-09 05:30:00	163	22.3708	5
2009-06-08 18:00:00	19	-21.5179	X				2009-06-09 06:30:00	163	22.3708	X
2009-06-08 18:15:00	16	-5.37948	X				2009-06-09 07:30:00	163	22.3708	0
2009-06-08 18:45:00	19	-21.5179	X				2009-06-09 08:30:00	162	22.2023	-1
2009-06-08 19:00:00	16	-5.37948	-3				2009-06-09 09:30:00	160	21.8665	-2
2009-06-08 19:15:00	16	-5.37948	0				2009-06-09 10:30:00	159	21.6992	-1
2009-06-08 19:45:00	16	-5.37948	-3				2009-06-09 11:30:00	159	21.6992	0
2009-06-08 20:00:00	16	-5.37948	0				2009-06-09 12:30:00	162	22.2023	X
2009-06-08 20:15:00	16	-5.37948	0				2009-06-09 13:30:00	160	21.8665	-2
2009-06-08 20:45:00	17	-10.759	1				2009-06-09 14:30:00	160	21.8665	0
2009-06-08 21:00:00	16	-5.37948	0				2009-06-09 15:30:00	161	22.0342	1
2009-06-08 21:15:00	16	-5.37948	0				2009-06-09 16:30:00	162	22.2023	1
2009-06-08 21:45:00	24	-48.4153	7				2009-06-09 17:30:00	163	22.3708	1
2009-06-08 22:00:00	16	-5.37948	0				2009-06-09 18:30:00	164	22.5397	X
2009-06-08 22:15:00	16	-5.37948	0				2009-06-09 19:30:00	156	21.1996	-8
2009-06-08 22:45:00	28	-69.9332	4				2009-06-09 20:30:00	164	22.5397	8
2009-06-08 23:00:00	16	-5.37948	0				2009-06-09 21:30:00	164	22.5397	0
2009-06-08 23:15:00	16	-5.37948	0				2009-06-09 22:30:00	162	22.2023	-2
2009-06-08 23:45:00	26	-59.1743	-2				2009-06-09 23:30:00	130	16.9887	-32		16.9887
2009-06-09	18	-16.1384	X				2009-06-10	142	18.9088	X
2009-06-09 00:15:00	17	-10.759	X				2009-06-10 00:30:00	159	21.6992	X
2009-06-09 01:00:00	24	-48.4153	6				2009-06-10 01:00:00	121	15.5678	-21
2009-06-09 01:15:00	17	-10.759	0				2009-06-10 01:30:00	154	20.8684	-5
2009-06-09 02:00:00	17	-10.759	-7				2009-06-10 02:00:00	152	20.5385	31	20.5385
2009-06-09 02:15:00	16	-5.37948	-1				2009-06-10 02:30:00	158	21.5323	4
2009-06-09 03:00:00	16	-5.37948	-1				2009-06-10 03:00:00	151	20.3741	-1
2009-06-09 03:15:00	16	-5.37948	0				2009-06-10 03:30:00	157	21.3657	-1
2009-06-09 04:00:00	17	-10.759	1				2009-06-10 04:00:00	150	20.2101	-1
2009-06-09 04:15:00	17	-10.759	1				2009-06-10 04:30:00	143	19.0704	-14
2009-06-09 05:00:00	17	-10.759	0				2009-06-10 05:00:00	143	19.0704	-7
2009-06-09 05:15:00	17	-10.759	0				2009-06-10 05:30:00	141	18.7474	-2
2009-06-09 06:00:00	18	-16.1384	X				2009-06-10 06:00:00	133	17.4656	X
2009-06-09 06:15:00	17	-10.759	X				2009-06-10 06:30:00	136	17.9445	X
2009-06-09 07:00:00	18	-16.1384	0				2009-06-10 07:00:00	135	17.7847	2
2009-06-09 07:15:00	18	-16.1384	1				2009-06-10 07:30:00	161	22.0342	25
2009-06-09 08:00:00	18	-16.1384	0				2009-06-10 08:00:00	161	22.0342	26
2009-06-09 08:15:00	20	-26.8974	2				2009-06-10 08:30:00	161	22.0342	0
2009-06-09 09:00:00	19	-21.5179	1				2009-06-10 09:00:00	161	22.0342	0
2009-06-09 09:15:00	18	-16.1384	-2				2009-06-10 09:30:00	161	22.0342	0
2009-06-09 10:00:00	19	-21.5179	0				2009-06-10 10:00:00	160	21.8665	-1
2009-06-09 10:15:00	17	-10.759	-1				2009-06-10 10:30:00	161	22.0342	0
2009-06-09 11:00:00	18	-16.1384	-1				2009-06-10 11:00:00	161	22.0342	1
2009-06-09 11:15:00	20	-26.8974	3				2009-06-10 11:30:00	161	22.0342	0
2009-06-09 12:00:00	18	-16.1384	X				2009-06-10 12:00:00	161	22.0342	X
2009-06-09 12:15:00	19	-21.5179	X				2009-06-10 12:30:00	161	22.0342	X
2009-06-09 13:00:00	18	-16.1384	0				2009-06-10 13:00:00	161	22.0342	0
2009-06-09 13:15:00	18	-16.1384	-1				2009-06-10 13:30:00	161	22.0342	0
2009-06-09 14:00:00	18	-16.1384	0				2009-06-10 14:00:00	161	22.0342	0
2009-06-09 14:15:00	20	-26.8974	2				2009-06-10 14:30:00	161	22.0342	0
2009-06-09 15:00:00	20	-26.8974	2				2009-06-10 15:00:00	161	22.0342	0
2009-06-09 15:15:00	19	-21.5179	-1				2009-06-10 15:30:00	161	22.0342	0
2009-06-09 16:00:00	18	-16.1384	-2				2009-06-10 16:00:00	161	22.0342	0
2009-06-09 16:15:00	17	-10.759	-2				2009-06-10 16:30:00	161	22.0342	0
2009-06-09 17:00:00	16	-5.37948	-2				2009-06-10 17:00:00	161	22.0342	0
2009-06-09 17:15:00	17	-10.759	0				2009-06-10 17:30:00	161	22.0342	0
2009-06-09 18:00:00	16	-5.37948	X				2009-06-10 18:00:00	162	22.2023	X
2009-06-09 18:15:00	16	-5.37948	X				2009-06-10 18:30:00	162	22.2023	X
2009-06-09 19:00:00	16	-5.37948	0				2009-06-10 19:00:00	162	22.2023	0
2009-06-09 19:15:00	16	-5.37948	0				2009-06-10 19:30:00	162	22.2023	0
2009-06-09 20:00:00	16	-5.37948	0				2009-06-10 20:00:00	163	22.3708	1
2009-06-09 20:15:00	16	-5.37948	0				2009-06-10 20:30:00	148	19.8829	-14
2009-06-09 21:00:00	16	-5.37948	0				2009-06-10 21:00:00	162	22.2023	-1
2009-06-09 21:15:00	16	-5.37948	0				2009-06-10 21:30:00	153	20.7033	5
2009-06-09 22:00:00	16	-5.37948	0				2009-06-10 22:00:00	163	22.3708	1
2009-06-09 22:15:00	21	-32.2769	5				2009-06-10 22:30:00	162	22.2023	9
2009-06-09 23:00:00	22	-37.6564	6				2009-06-10 23:00:00	142	18.9088	-21
2009-06-09 23:15:00	19	-21.5179	-2				2009-06-10 23:30:00	158	21.5323	-4
2009-06-11 00:30:00	20	-26.8974	X				2009-06-11 00:45:00	156	21.1996	X
2009-06-11 00:45:00	18	-16.1384	X				2009-06-11 01:45:00	148	19.8829	-8
2009-06-11 01:30:00	16	-5.37948	-4				2009-06-11 02:45:00	161	22.0342	13
2009-06-11 01:45:00	20	-26.8974	2				2009-06-11 03:45:00	161	22.0342	0
2009-06-11 02:30:00	18	-16.1384	2				2009-06-11 04:45:00	161	22.0342	0
2009-06-11 02:45:00	16	-5.37948	-4				2009-06-11 05:45:00	162	22.2023	1
2009-06-11 03:30:00	19	-21.5179	1				2009-06-11 06:45:00	162	22.2023	X
2009-06-11 03:45:00	16	-5.37948	0				2009-06-11 07:45:00	163	22.3708	1
2009-06-11 04:30:00	16	-5.37948	-3				2009-06-11 08:45:00	163	22.3708	0
2009-06-11 04:45:00	16	-5.37948	0				2009-06-11 09:45:00	163	22.3708	0
2009-06-11 05:30:00	17	-10.759	1				2009-06-11 10:45:00	164	22.5397	1
2009-06-11 05:45:00	17	-10.759	1				2009-06-11 11:45:00	164	22.5397	0
2009-06-11 06:30:00	18	-16.1384	X				2009-06-11 12:45:00	164	22.5397	X
2009-06-11 06:45:00	17	-10.759	X				2009-06-11 13:45:00	163	22.3708	-1
2009-06-11 07:30:00	20	-26.8974	2				2009-06-11 14:45:00	164	22.5397	1
2009-06-11 07:45:00	17	-10.759	0				2009-06-11 15:45:00	165	22.709	1
2009-06-11 08:30:00	19	-21.5179	-1				2009-06-11 16:45:00	165	22.709	0
2009-06-11 08:45:00	18	-16.1384	1				2009-06-11 17:45:00	162	22.2023	-3
2009-06-11 09:30:00	19	-21.5179	0				2009-06-11 18:45:00	165	22.709	X
2009-06-11 09:45:00	17	-10.759	-1				2009-06-11 19:45:00	165	22.709	0
2009-06-11 10:30:00	20	-26.8974	1				2009-06-11 20:45:00	159	21.6992	-6
2009-06-11 10:45:00	18	-16.1384	1				2009-06-11 21:45:00	164	22.5397	5
2009-06-11 11:30:00	19	-21.5179	-1				2009-06-11 22:45:00	165	22.709	1
2009-06-11 11:45:00	17	-10.759	-1				2009-06-11 23:45:00	165	22.709	0
2009-06-11 12:30:00	16	-5.37948	X				2009-06-12 00:15:00	164	22.5397	X
2009-06-11 12:45:00	16	-5.37948	X				2009-06-12 01:15:00	132	17.3065	-32		17.3065
2009-06-11 13:30:00	16	-5.37948	0				2009-06-12 02:15:00	146	19.557	14
2009-06-11 13:45:00	16	-5.37948	0				2009-06-12 03:15:00	163	22.3708	17
2009-06-11 14:30:00	16	-5.37948	0				2009-06-12 04:15:00	163	22.3708	0
2009-06-11 14:45:00	16	-5.37948	0				2009-06-12 05:15:00	163	22.3708	0
2009-06-11 15:30:00	16	-5.37948	0				2009-06-12 06:15:00	142	18.9088	X
2009-06-11 15:45:00	16	-5.37948	0				2009-06-12 07:15:00	138	18.2649	-4
2009-06-11 16:30:00	16	-5.37948	0				2009-06-12 08:15:00	145	19.3945	7
2009-06-11 16:45:00	16	-5.37948	0				2009-06-12 09:15:00	125	16.1977	-20
2009-06-11 17:30:00	17	-10.759	1				2009-06-12 10:15:00	132	17.3065	7
2009-06-11 17:45:00	17	-10.759	1				2009-06-12 11:15:00	117	14.9402	-15
2009-06-11 18:30:00	17	-10.759	X				2009-06-12 12:15:00	163	22.3708	X
2009-06-11 18:45:00	17	-10.759	X				2009-06-12 13:15:00	163	22.3708	0
2009-06-11 19:30:00	18	-16.1384	1				2009-06-12 14:15:00	162	22.2023	-1
2009-06-11 19:45:00	18	-16.1384	1				2009-06-12 15:15:00	162	22.2023	0
2009-06-11 20:30:00	19	-21.5179	1				2009-06-12 16:15:00	162	22.2023	0
2009-06-11 20:45:00	22	-37.6564	4				2009-06-12 17:15:00	160	21.8665	-2
2009-06-11 21:30:00	29	-75.3127	10				2009-06-12 18:15:00	148	19.8829	X
2009-06-11 21:45:00	18	-16.1384	-4				2009-06-12 19:15:00	165	22.709	17
2009-06-11 22:30:00	18	-16.1384	-11				2009-06-12 20:15:00	160	21.8665	-5
2009-06-11 22:45:00	19	-21.5179	1				2009-06-12 21:15:00	166	22.8787	6
2009-06-11 23:30:00	19	-21.5179	1				2009-06-12 22:15:00	164	22.5397	-2
2009-06-11 23:45:00	19	-21.5179	0				2009-06-12 23:15:00	165	22.709	1
2009-06-12 00:15:00	19	-21.5179	X				2009-06-13 00:15:00	165	22.709	X
2009-06-12 00:45:00	16	-5.37948	X				2009-06-13 01:15:00	162	22.2023	-3
2009-06-12 01:15:00	26	-59.1743	7				2009-06-13 02:15:00	130	16.9887	-32		16.9887
2009-06-12 01:45:00	19	-21.5179	3				2009-06-13 03:15:00	161	22.0342	31	22.0342
2009-06-12 02:15:00	26	-59.1743	0				2009-06-13 04:15:00	161	22.0342	0
2009-06-12 02:45:00	16	-5.37948	-3				2009-06-13 05:15:00	164	22.5397	3
2009-06-12 03:15:00	16	-5.37948	-10				2009-06-13 06:15:00	164	22.5397	X
2009-06-12 03:45:00	16	-5.37948	0				2009-06-13 07:15:00	152	20.5385	-12
2009-06-12 04:15:00	16	-5.37948	0				2009-06-13 08:15:00	163	22.3708	11
2009-06-12 04:45:00	16	-5.37948	0				2009-06-13 09:15:00	164	22.5397	1
2009-06-12 05:15:00	16	-5.37948	0				2009-06-13 10:15:00	164	22.5397	0
2009-06-12 05:45:00	17	-10.759	1				2009-06-13 11:15:00	164	22.5397	0
2009-06-12 06:15:00	21	-32.2769	X				2009-06-13 12:15:00	164	22.5397	X
2009-06-12 06:45:00	21	-32.2769	X				2009-06-13 13:15:00	164	22.5397	0
2009-06-12 07:15:00	23	-43.0358	2				2009-06-13 14:15:00	164	22.5397	0
2009-06-12 07:45:00	22	-37.6564	1				2009-06-13 15:15:00	164	22.5397	0
2009-06-12 08:15:00	23	-43.0358	0				2009-06-13 16:15:00	164	22.5397	0
2009-06-12 08:45:00	23	-43.0358	1				2009-06-13 17:15:00	162	22.2023	-2
2009-06-12 09:15:00	25	-53.7948	2				2009-06-13 18:15:00	164	22.5397	X
2009-06-12 09:45:00	23	-43.0358	0				2009-06-13 19:15:00	164	22.5397	0
2009-06-12 10:15:00	24	-48.4153	-1				2009-06-13 20:15:00	164	22.5397	0
2009-06-12 10:45:00	24	-48.4153	1				2009-06-13 21:15:00	163	22.3708	-1
2009-06-12 11:15:00	27	-64.5538	3				2009-06-13 22:15:00	162	22.2023	-1
2009-06-12 11:45:00	24	-48.4153	0				2009-06-13 23:15:00	163	22.3708	1
2009-06-12 12:15:00	20	-26.8974	X				2009-06-15	112	14.1581	X
2009-06-12 12:45:00	19	-21.5179	X				2009-06-15 00:30:00	164	22.5397	X
2009-06-12 13:15:00	19	-21.5179	-1				2009-06-15 01:00:00	143	19.0704	31	19.0704
2009-06-12 13:45:00	19	-21.5179	0				2009-06-15 01:30:00	164	22.5397	0
2009-06-12 14:15:00	20	-26.8974	1				2009-06-15 02:00:00	123	15.8825	-20
2009-06-12 14:45:00	19	-21.5179	0				2009-06-15 02:30:00	145	19.3945	-19
2009-06-12 15:15:00	17	-10.759	-3				2009-06-15 03:00:00	154	20.8684	31	20.8684
2009-06-12 15:45:00	18	-16.1384	-1				2009-06-15 03:30:00	144	19.2323	-1
2009-06-12 16:15:00	17	-10.759	0				2009-06-15 04:00:00	164	22.5397	10
2009-06-12 16:45:00	19	-21.5179	1				2009-06-15 04:30:00	164	22.5397	20
2009-06-12 17:15:00	19	-21.5179	2				2009-06-15 05:00:00	164	22.5397	0
2009-06-12 17:45:00	17	-10.759	-2				2009-06-15 05:30:00	164	22.5397	0
2009-06-12 18:15:00	18	-16.1384	X				2009-06-15 06:00:00	164	22.5397	X
2009-06-12 18:45:00	16	-5.37948	X				2009-06-15 06:30:00	164	22.5397	X
2009-06-12 19:15:00	16	-5.37948	-2				2009-06-15 07:00:00	164	22.5397	0
2009-06-12 19:45:00	16	-5.37948	0				2009-06-15 07:30:00	164	22.5397	0
2009-06-12 20:15:00	16	-5.37948	0				2009-06-15 08:00:00	163	22.3708	-1
2009-06-12 20:45:00	16	-5.37948	0				2009-06-15 08:30:00	162	22.2023	-2
2009-06-12 21:15:00	16	-5.37948	0				2009-06-15 09:00:00	163	22.3708	0
2009-06-12 21:45:00	17	-10.759	1				2009-06-15 09:30:00	155	21.0338	-7
2009-06-12 22:15:00	17	-10.759	1				2009-06-15 10:00:00	163	22.3708	0
2009-06-12 22:45:00	16	-5.37948	-1				2009-06-15 10:30:00	163	22.3708	8
2009-06-12 23:15:00	16	-5.37948	-1				2009-06-15 11:00:00	163	22.3708	0
2009-06-12 23:45:00	38	-123.728	22				2009-06-15 11:30:00	164	22.5397	1
2009-06-14 00:30:00	29	-75.3127	X				2009-06-15 12:00:00	163	22.3708	X
2009-06-14 01:30:00	16	-5.37948	-13				2009-06-15 12:30:00	163	22.3708	X
2009-06-14 02:30:00	28	-69.9332	12				2009-06-15 13:00:00	163	22.3708	0
2009-06-14 03:30:00	16	-5.37948	-12				2009-06-15 13:30:00	164	22.5397	1
2009-06-14 04:30:00	20	-26.8974	4				2009-06-15 14:00:00	164	22.5397	1
2009-06-14 05:30:00	16	-5.37948	-4				2009-06-15 14:30:00	163	22.3708	-1
2009-06-14 06:30:00	16	-5.37948	X				2009-06-15 15:00:00	164	22.5397	0
2009-06-14 07:30:00	21	-32.2769	5				2009-06-15 15:30:00	163	22.3708	0
2009-06-14 08:30:00	19	-21.5179	-2				2009-06-15 16:00:00	163	22.3708	-1
2009-06-14 09:30:00	19	-21.5179	0				2009-06-15 16:30:00	163	22.3708	0
2009-06-14 10:30:00	19	-21.5179	0				2009-06-15 17:00:00	163	22.3708	0
2009-06-14 11:30:00	20	-26.8974	1				2009-06-15 17:30:00	164	22.5397	1
2009-06-14 12:30:00	19	-21.5179	X				2009-06-15 18:00:00	164	22.5397	X
2009-06-14 13:30:00	20	-26.8974	1				2009-06-15 18:30:00	164	22.5397	X
2009-06-14 14:30:00	19	-21.5179	-1				2009-06-15 19:00:00	163	22.3708	-1
2009-06-14 15:30:00	18	-16.1384	-1				2009-06-15 19:30:00	164	22.5397	0
2009-06-14 16:30:00	18	-16.1384	0				2009-06-15 20:00:00	164	22.5397	1
2009-06-14 17:30:00	18	-16.1384	0				2009-06-15 20:30:00	165	22.709	1
2009-06-14 18:30:00	18	-16.1384	X				2009-06-15 21:00:00	164	22.5397	0
2009-06-14 19:30:00	18	-16.1384	0				2009-06-15 21:30:00	147	19.7198	-18
2009-06-14 20:30:00	27	-64.5538	9				2009-06-15 22:00:00	168	23.2195	4
2009-06-14 21:30:00	16	-5.37948	-11				2009-06-15 22:30:00	163	22.3708	16
2009-06-14 22:30:00	47	-172.143	31	-172.143			2009-06-15 23:00:00	167	23.0489	-1
2009-06-14 23:30:00	16	-5.37948	-31				2009-06-15 23:30:00	169	23.3906	6
2009-06-15 00:45:00	20	-26.8974	X				2009-06-16	170	23.5621	X
2009-06-15 01:45:00	16	-5.37948	-4				2009-06-16 00:45:00	147	19.7198	X
2009-06-15 02:45:00	21	-32.2769	5				2009-06-16 01:00:00	169	23.3906	-1
2009-06-15 03:45:00	16	-5.37948	-5				2009-06-16 01:45:00	169	23.3906	22
2009-06-15 04:45:00	16	-5.37948	0				2009-06-16 02:00:00	137	18.1046	-32		18.1046
2009-06-15 05:45:00	16	-5.37948	0				2009-06-16 02:45:00	167	23.0489	-2
2009-06-15 06:45:00	16	-5.37948	X				2009-06-16 03:00:00	167	23.0489	30
2009-06-15 07:45:00	17	-10.759	1				2009-06-16 03:45:00	170	23.5621	3
2009-06-15 08:45:00	18	-16.1384	1				2009-06-16 04:00:00	169	23.3906	2
2009-06-15 09:45:00	18	-16.1384	0				2009-06-16 04:45:00	169	23.3906	-1
2009-06-15 10:45:00	17	-10.759	-1				2009-06-16 05:00:00	169	23.3906	0
2009-06-15 11:45:00	18	-16.1384	1				2009-06-16 05:45:00	169	23.3906	0
2009-06-15 12:45:00	19	-21.5179	X				2009-06-16 06:00:00	168	23.2195	X
2009-06-15 13:45:00	18	-16.1384	-1				2009-06-16 06:45:00	168	23.2195	X
2009-06-15 14:45:00	21	-32.2769	3				2009-06-16 07:00:00	168	23.2195	0
2009-06-15 15:45:00	20	-26.8974	-1				2009-06-16 07:45:00	168	23.2195	0
2009-06-15 16:45:00	20	-26.8974	0				2009-06-16 08:00:00	168	23.2195	0
2009-06-15 17:45:00	16	-5.37948	-4				2009-06-16 08:45:00	136	17.9445	-32		17.9445
2009-06-15 18:45:00	16	-5.37948	X				2009-06-16 09:00:00	136	17.9445	-32		17.9445
2009-06-15 19:45:00	16	-5.37948	0				2009-06-16 09:45:00	157	21.3657	21
2009-06-15 20:45:00	35	-107.59	19				2009-06-16 10:00:00	167	23.0489	31	23.0489
2009-06-15 21:45:00	16	-5.37948	-19				2009-06-16 10:45:00	167	23.0489	10
2009-06-15 22:45:00	18	-16.1384	2				2009-06-16 11:00:00	167	23.0489	0
2009-06-15 23:45:00	16	-5.37948	-2				2009-06-16 11:45:00	167	23.0489	0
2009-06-16 00:45:00	31	-86.0717	X				2009-06-16 12:00:00	167	23.0489	X
2009-06-16 01:45:00	16	-5.37948	-15				2009-06-16 12:45:00	168	23.2195	X
2009-06-16 02:45:00	16	-5.37948	0				2009-06-16 13:00:00	168	23.2195	1
2009-06-16 03:45:00	16	-5.37948	0				2009-06-16 13:45:00	168	23.2195	0
2009-06-16 04:45:00	16	-5.37948	0				2009-06-16 14:00:00	169	23.3906	1
2009-06-16 05:45:00	16	-5.37948	0				2009-06-16 14:45:00	168	23.2195	0
2009-06-16 06:45:00	16	-5.37948	X				2009-06-16 15:00:00	168	23.2195	-1
2009-06-16 07:45:00	16	-5.37948	0				2009-06-16 15:45:00	168	23.2195	0
2009-06-16 08:45:00	22	-37.6564	6				2009-06-16 16:00:00	168	23.2195	0
2009-06-16 09:45:00	22	-37.6564	0				2009-06-16 16:45:00	167	23.0489	-1
2009-06-16 10:45:00	18	-16.1384	-4				2009-06-16 17:00:00	168	23.2195	0
2009-06-16 11:45:00	17	-10.759	-1				2009-06-16 17:45:00	167	23.0489	0
2009-06-16 12:45:00	17	-10.759	X				2009-06-16 18:00:00	168	23.2195	X
2009-06-16 13:45:00	18	-16.1384	1				2009-06-16 18:45:00	168	23.2195	X
2009-06-16 14:45:00	18	-16.1384	0				2009-06-16 19:00:00	168	23.2195	0
2009-06-16 15:45:00	18	-16.1384	0				2009-06-16 19:45:00	170	23.5621	2
2009-06-16 16:45:00	17	-10.759	-1				2009-06-16 20:00:00	170	23.5621	2
2009-06-16 17:45:00	17	-10.759	0				2009-06-16 20:45:00	171	23.7341	1
2009-06-16 18:45:00	16	-5.37948	X				2009-06-16 21:00:00	171	23.7341	1
2009-06-16 19:45:00	16	-5.37948	0				2009-06-16 21:45:00	171	23.7341	0
2009-06-16 20:45:00	16	-5.37948	0				2009-06-16 22:00:00	172	23.9065	1
2009-06-16 21:45:00	16	-5.37948	0				2009-06-16 22:45:00	168	23.2195	-3
2009-06-16 22:45:00	18	-16.1384	2				2009-06-16 23:00:00	171	23.7341	-1
2009-06-16 23:45:00	17	-10.759	-1				2009-06-16 23:45:00	171	23.7341	3
2009-06-17 00:15:00	17	-10.759	X				2009-06-18 00:30:00	172	23.9065	X
2009-06-17 00:45:00	20	-26.8974	X				2009-06-18 00:45:00	162	22.2023	X
2009-06-17 01:15:00	16	-5.37948	-1				2009-06-18 01:30:00	169	23.3906	-3
2009-06-17 01:45:00	16	-5.37948	-4				2009-06-18 01:45:00	165	22.709	3
2009-06-17 02:15:00	16	-5.37948	0				2009-06-18 02:30:00	165	22.709	-4
2009-06-17 02:45:00	17	-10.759	1				2009-06-18 02:45:00	170	23.5621	5
2009-06-17 03:15:00	16	-5.37948	0				2009-06-18 03:30:00	169	23.3906	4
2009-06-17 03:45:00	16	-5.37948	-1				2009-06-18 03:45:00	169	23.3906	-1
2009-06-17 04:15:00	16	-5.37948	0				2009-06-18 04:30:00	170	23.5621	1
2009-06-17 04:45:00	17	-10.759	1				2009-06-18 04:45:00	168	23.2195	-1
2009-06-17 05:15:00	16	-5.37948	0				2009-06-18 05:30:00	171	23.7341	1
2009-06-17 05:45:00	16	-5.37948	-1				2009-06-18 05:45:00	170	23.5621	2
2009-06-17 06:15:00	21	-32.2769	X				2009-06-18 06:30:00	167	23.0489	X
2009-06-17 06:45:00	19	-21.5179	X				2009-06-18 06:45:00	171	23.7341	X
2009-06-17 07:15:00	20	-26.8974	-1				2009-06-18 07:30:00	171	23.7341	4
2009-06-17 07:45:00	19	-21.5179	0				2009-06-18 07:45:00	171	23.7341	0
2009-06-17 08:15:00	16	-5.37948	-4				2009-06-18 08:30:00	171	23.7341	0
2009-06-17 08:45:00	21	-32.2769	2				2009-06-18 08:45:00	171	23.7341	0
2009-06-17 09:15:00	18	-16.1384	2				2009-06-18 09:30:00	171	23.7341	0
2009-06-17 09:45:00	21	-32.2769	0				2009-06-18 09:45:00	156	21.1996	-15
2009-06-17 10:15:00	21	-32.2769	3				2009-06-18 10:30:00	147	19.7198	-24
2009-06-17 10:45:00	18	-16.1384	-3				2009-06-18 10:45:00	135	17.7847	-21
2009-06-17 11:15:00	21	-32.2769	0				2009-06-18 11:30:00	145	19.3945	-2
2009-06-17 11:45:00	22	-37.6564	4				2009-06-18 11:45:00	151	20.3741	16
2009-06-17 12:15:00	18	-16.1384	X				2009-06-18 12:30:00	170	23.5621	X
2009-06-17 12:45:00	18	-16.1384	X				2009-06-18 12:45:00	162	22.2023	X
2009-06-17 13:15:00	18	-16.1384	0				2009-06-18 13:30:00	169	23.3906	-1
2009-06-17 13:45:00	18	-16.1384	0				2009-06-18 13:45:00	169	23.3906	7
2009-06-17 14:15:00	18	-16.1384	0				2009-06-18 14:30:00	169	23.3906	0
2009-06-17 14:45:00	19	-21.5179	1				2009-06-18 14:45:00	169	23.3906	0
2009-06-17 15:15:00	18	-16.1384	0				2009-06-18 15:30:00	169	23.3906	0
2009-06-17 15:45:00	17	-10.759	-2				2009-06-18 15:45:00	169	23.3906	0
2009-06-17 16:15:00	18	-16.1384	0				2009-06-18 16:30:00	169	23.3906	0
2009-06-17 16:45:00	17	-10.759	0				2009-06-18 16:45:00	169	23.3906	0
2009-06-17 17:15:00	17	-10.759	-1				2009-06-18 17:30:00	169	23.3906	0
2009-06-17 17:45:00	18	-16.1384	1				2009-06-18 17:45:00	162	22.2023	-7
2009-06-17 18:15:00	16	-5.37948	X				2009-06-18 18:30:00	169	23.3906	X
2009-06-17 18:45:00	17	-10.759	X				2009-06-18 18:45:00	161	22.0342	X
2009-06-17 19:15:00	17	-10.759	1				2009-06-18 19:30:00	170	23.5621	1
2009-06-17 19:45:00	16	-5.37948	-1				2009-06-18 19:45:00	171	23.7341	10
2009-06-17 20:15:00	18	-16.1384	1				2009-06-18 20:30:00	171	23.7341	1
2009-06-17 20:45:00	17	-10.759	1				2009-06-18 20:45:00	171	23.7341	0
2009-06-17 21:15:00	17	-10.759	-1				2009-06-18 21:30:00	171	23.7341	0
2009-06-17 21:45:00	37	-118.349	20				2009-06-18 21:45:00	171	23.7341	0
2009-06-17 22:15:00	16	-5.37948	-1				2009-06-18 22:30:00	139	18.4255	-32		18.4255
2009-06-17 22:45:00	16	-5.37948	-21				2009-06-18 22:45:00	170	23.5621	-1
2009-06-17 23:15:00	16	-5.37948	0				2009-06-18 23:30:00	130	16.9887	-9
2009-06-17 23:45:00	36	-112.969	20				2009-06-18 23:45:00	164	22.5397	-6
2009-06-18	16	-5.37948	X				2009-06-19 00:30:00	166	22.8787	X
2009-06-18 00:30:00	16	-5.37948	X				2009-06-19 01:30:00	163	22.3708	-3
2009-06-18 01:00:00	18	-16.1384	2				2009-06-19 02:30:00	148	19.8829	-15
2009-06-18 01:30:00	18	-16.1384	2				2009-06-19 03:30:00	166	22.8787	18
2009-06-18 02:00:00	16	-5.37948	-2				2009-06-19 04:30:00	168	23.2195	2
2009-06-18 02:30:00	19	-21.5179	1				2009-06-19 05:30:00	168	23.2195	0
2009-06-18 03:00:00	21	-32.2769	5				2009-06-19 06:30:00	170	23.5621	X
2009-06-18 03:30:00	16	-5.37948	-3				2009-06-19 07:30:00	167	23.0489	-3
2009-06-18 04:00:00	16	-5.37948	-5				2009-06-19 08:30:00	151	20.3741	-16
2009-06-18 04:30:00	16	-5.37948	0				2009-06-19 09:30:00	153	20.7033	2
2009-06-18 05:00:00	16	-5.37948	0				2009-06-19 10:30:00	157	21.3657	4
2009-06-18 05:30:00	16	-5.37948	0				2009-06-19 11:30:00	162	22.2023	5
2009-06-18 06:00:00	21	-32.2769	X				2009-06-19 12:30:00	160	21.8665	X
2009-06-18 06:30:00	16	-5.37948	X				2009-06-19 13:30:00	162	22.2023	2
2009-06-18 07:00:00	16	-5.37948	-5				2009-06-19 14:30:00	162	22.2023	0
2009-06-18 07:30:00	16	-5.37948	0				2009-06-19 15:30:00	162	22.2023	0
2009-06-18 08:00:00	16	-5.37948	0				2009-06-19 16:30:00	162	22.2023	0
2009-06-18 08:30:00	16	-5.37948	0				2009-06-19 17:30:00	162	22.2023	0
2009-06-18 09:00:00	16	-5.37948	0				2009-06-19 18:30:00	162	22.2023	X
2009-06-18 09:30:00	16	-5.37948	0				2009-06-19 19:30:00	162	22.2023	0
2009-06-18 10:00:00	22	-37.6564	6				2009-06-19 20:30:00	162	22.2023	0
2009-06-18 10:30:00	22	-37.6564	6				2009-06-19 21:30:00	162	22.2023	0
2009-06-18 11:00:00	21	-32.2769	-1				2009-06-19 22:30:00	162	22.2023	0
2009-06-18 11:30:00	21	-32.2769	-1				2009-06-19 23:30:00	144	19.2323	-18
2009-06-18 12:00:00	16	-5.37948	X				2009-06-20	161	22.0342	X
2009-06-18 12:30:00	16	-5.37948	X				2009-06-20 00:15:00	161	22.0342	X
2009-06-18 13:00:00	19	-21.5179	3				2009-06-20 01:00:00	161	22.0342	0
2009-06-18 13:30:00	16	-5.37948	0				2009-06-20 01:15:00	162	22.2023	1
2009-06-18 14:00:00	17	-10.759	-2				2009-06-20 02:00:00	161	22.0342	0
2009-06-18 14:30:00	16	-5.37948	0				2009-06-20 02:15:00	155	21.0338	-7
2009-06-18 15:00:00	17	-10.759	0				2009-06-20 03:00:00	161	22.0342	0
2009-06-18 15:30:00	17	-10.759	1				2009-06-20 03:15:00	160	21.8665	5
2009-06-18 16:00:00	16	-5.37948	-1				2009-06-20 04:00:00	161	22.0342	0
2009-06-18 16:30:00	17	-10.759	0				2009-06-20 04:15:00	161	22.0342	1
2009-06-18 17:00:00	17	-10.759	1				2009-06-20 05:00:00	161	22.0342	0
2009-06-18 17:30:00	17	-10.759	0				2009-06-20 05:15:00	151	20.3741	-10
2009-06-18 18:00:00	28	-69.9332	X				2009-06-20 06:00:00	154	20.8684	X
2009-06-18 18:30:00	16	-5.37948	X				2009-06-20 06:15:00	148	19.8829	X
2009-06-18 19:00:00	16	-5.37948	-12				2009-06-20 07:00:00	160	21.8665	6
2009-06-18 19:30:00	16	-5.37948	0				2009-06-20 07:15:00	159	21.6992	11
2009-06-18 20:00:00	22	-37.6564	6				2009-06-20 08:00:00	160	21.8665	0
2009-06-18 20:30:00	16	-5.37948	0				2009-06-20 08:15:00	160	21.8665	1
2009-06-18 21:00:00	16	-5.37948	-6				2009-06-20 09:00:00	159	21.6992	-1
2009-06-18 21:30:00	16	-5.37948	0				2009-06-20 09:15:00	159	21.6992	-1
2009-06-18 22:00:00	16	-5.37948	0				2009-06-20 10:00:00	160	21.8665	1
2009-06-18 22:30:00	32	-91.4512	16				2009-06-20 10:15:00	159	21.6992	0
2009-06-18 23:00:00	23	-43.0358	7				2009-06-20 11:00:00	157	21.3657	-3
2009-06-18 23:30:00	27	-64.5538	-5				2009-06-20 11:15:00	152	20.5385	-7
2009-06-19 00:45:00	21	-32.2769	X				2009-06-20 12:00:00	146	19.557	X
2009-06-19 01:45:00	24	-48.4153	3				2009-06-20 12:15:00	159	21.6992	X
2009-06-19 02:45:00	19	-21.5179	-5				2009-06-20 13:00:00	159	21.6992	13
2009-06-19 03:45:00	16	-5.37948	-3				2009-06-20 13:15:00	159	21.6992	0
2009-06-19 04:45:00	16	-5.37948	0				2009-06-20 14:00:00	159	21.6992	0
2009-06-19 05:45:00	17	-10.759	1				2009-06-20 14:15:00	160	21.8665	1
2009-06-19 06:45:00	17	-10.759	X				2009-06-20 15:00:00	159	21.6992	0
2009-06-19 07:45:00	16	-5.37948	-1				2009-06-20 15:15:00	160	21.8665	0
2009-06-19 08:45:00	19	-21.5179	3				2009-06-20 16:00:00	160	21.8665	1
2009-06-19 09:45:00	16	-5.37948	-3				2009-06-20 16:15:00	157	21.3657	-3
2009-06-19 10:45:00	21	-32.2769	5				2009-06-20 17:00:00	160	21.8665	0
2009-06-19 11:45:00	18	-16.1384	-3				2009-06-20 17:15:00	160	21.8665	3
2009-06-19 12:45:00	23	-43.0358	X				2009-06-20 18:00:00	160	21.8665	X
2009-06-19 13:45:00	18	-16.1384	-5				2009-06-20 18:15:00	160	21.8665	X
2009-06-19 14:45:00	19	-21.5179	1				2009-06-20 19:00:00	128	16.6718	-32		16.6718
2009-06-19 15:45:00	18	-16.1384	-1				2009-06-20 19:15:00	160	21.8665	0
2009-06-19 16:45:00	19	-21.5179	1				2009-06-20 20:00:00	159	21.6992	31	21.6992
2009-06-19 17:45:00	23	-43.0358	4				2009-06-20 20:15:00	160	21.8665	0
2009-06-19 18:45:00	18	-16.1384	X				2009-06-20 21:00:00	160	21.8665	1
2009-06-19 19:45:00	19	-21.5179	1				2009-06-20 21:15:00	157	21.3657	-3
2009-06-19 20:45:00	18	-16.1384	-1				2009-06-20 22:00:00	158	21.5323	-2
2009-06-19 21:45:00	18	-16.1384	0				2009-06-20 22:15:00	160	21.8665	3
2009-06-19 22:45:00	18	-16.1384	0				2009-06-20 23:00:00	160	21.8665	2
2009-06-19 23:45:00	18	-16.1384	0				2009-06-20 23:15:00	162	22.2023	2
2009-06-20	23	-43.0358	X				2009-06-21 00:15:00	159	21.6992	X
2009-06-20 00:15:00	16	-5.37948	X				2009-06-21 00:30:00	158	21.5323	X
2009-06-20 01:00:00	18	-16.1384	-5				2009-06-21 01:15:00	158	21.5323	-1
2009-06-20 01:15:00	17	-10.759	1				2009-06-21 01:30:00	161	22.0342	3
2009-06-20 02:00:00	19	-21.5179	1				2009-06-21 02:15:00	162	22.2023	4
2009-06-20 02:15:00	19	-21.5179	2				2009-06-21 02:30:00	162	22.2023	1
2009-06-20 03:00:00	19	-21.5179	0				2009-06-21 03:15:00	161	22.0342	-1
2009-06-20 03:15:00	21	-32.2769	2				2009-06-21 03:30:00	162	22.2023	0
2009-06-20 04:00:00	21	-32.2769	2				2009-06-21 04:15:00	161	22.0342	0
2009-06-20 04:15:00	17	-10.759	-4				2009-06-21 04:30:00	154	20.8684	-8
2009-06-20 05:00:00	16	-5.37948	-5				2009-06-21 05:15:00	161	22.0342	0
2009-06-20 05:15:00	22	-37.6564	5				2009-06-21 05:30:00	161	22.0342	7
2009-06-20 06:00:00	17	-10.759	X				2009-06-21 06:15:00	161	22.0342	X
2009-06-20 06:15:00	24	-48.4153	X				2009-06-21 06:30:00	161	22.0342	X
2009-06-20 07:00:00	17	-10.759	0				2009-06-21 07:15:00	161	22.0342	0
2009-06-20 07:15:00	17	-10.759	-7				2009-06-21 07:30:00	161	22.0342	0
2009-06-20 08:00:00	17	-10.759	0				2009-06-21 08:15:00	157	21.3657	-4
2009-06-20 08:15:00	18	-16.1384	1				2009-06-21 08:30:00	160	21.8665	-1
2009-06-20 09:00:00	17	-10.759	0				2009-06-21 09:15:00	161	22.0342	4
2009-06-20 09:15:00	17	-10.759	-1				2009-06-21 09:30:00	155	21.0338	-5
2009-06-20 10:00:00	18	-16.1384	1				2009-06-21 10:15:00	160	21.8665	-1
2009-06-20 10:15:00	17	-10.759	0				2009-06-21 10:30:00	160	21.8665	5
2009-06-20 11:00:00	20	-26.8974	2				2009-06-21 11:15:00	160	21.8665	0
2009-06-20 11:15:00	20	-26.8974	3				2009-06-21 11:30:00	160	21.8665	0
2009-06-20 12:00:00	25	-53.7948	X				2009-06-21 12:15:00	160	21.8665	X
2009-06-20 12:15:00	16	-5.37948	X				2009-06-21 12:30:00	160	21.8665	X
2009-06-20 13:00:00	17	-10.759	-8				2009-06-21 13:15:00	161	22.0342	1
2009-06-20 13:15:00	18	-16.1384	2				2009-06-21 13:30:00	161	22.0342	1
2009-06-20 14:00:00	16	-5.37948	-1				2009-06-21 14:15:00	144	19.2323	-17
2009-06-20 14:15:00	16	-5.37948	-2				2009-06-21 14:30:00	161	22.0342	0
2009-06-20 15:00:00	16	-5.37948	0				2009-06-21 15:15:00	131	17.1475	-13
2009-06-20 15:15:00	16	-5.37948	0				2009-06-21 15:30:00	160	21.8665	-1
2009-06-20 16:00:00	17	-10.759	1				2009-06-21 16:15:00	159	21.6992	28
2009-06-20 16:15:00	17	-10.759	1				2009-06-21 16:30:00	153	20.7033	-7
2009-06-20 17:00:00	16	-5.37948	-1				2009-06-21 17:15:00	153	20.7033	-6
2009-06-20 17:15:00	19	-21.5179	2				2009-06-21 17:30:00	161	22.0342	8
2009-06-20 18:00:00	16	-5.37948	X				2009-06-21 18:15:00	160	21.8665	X
2009-06-20 18:15:00	20	-26.8974	X				2009-06-21 18:30:00	160	21.8665	X
2009-06-20 19:00:00	25	-53.7948	9				2009-06-21 19:15:00	152	20.5385	-8
2009-06-20 19:15:00	16	-5.37948	-4				2009-06-21 19:30:00	161	22.0342	1
2009-06-20 20:00:00	16	-5.37948	-9				2009-06-21 20:15:00	161	22.0342	9
2009-06-20 20:15:00	19	-21.5179	3				2009-06-21 20:30:00	159	21.6992	-2
2009-06-20 21:00:00	16	-5.37948	0				2009-06-21 21:15:00	158	21.5323	-3
2009-06-20 21:15:00	16	-5.37948	-3				2009-06-21 21:30:00	152	20.5385	-7
2009-06-20 22:00:00	18	-16.1384	2				2009-06-21 22:15:00	158	21.5323	0
2009-06-20 22:15:00	20	-26.8974	4				2009-06-21 22:30:00	158	21.5323	6
2009-06-20 23:00:00	20	-26.8974	2				2009-06-21 23:15:00	141	18.7474	-17
2009-06-20 23:15:00	16	-5.37948	-4				2009-06-21 23:30:00	159	21.6992	1
2009-06-21 00:15:00	21	-32.2769	X				2009-06-22	157	21.3657	X
2009-06-21 00:30:00	18	-16.1384	X				2009-06-22 01:00:00	156	21.1996	-1
2009-06-21 00:45:00	20	-26.8974	X				2009-06-22 02:00:00	159	21.6992	3
2009-06-21 01:15:00	21	-32.2769	0				2009-06-22 03:00:00	160	21.8665	1
2009-06-21 01:30:00	18	-16.1384	0				2009-06-22 04:00:00	160	21.8665	0
2009-06-21 01:45:00	18	-16.1384	-2				2009-06-22 05:00:00	160	21.8665	0
2009-06-21 02:15:00	16	-5.37948	-5				2009-06-22 06:00:00	160	21.8665	X
2009-06-21 02:30:00	17	-10.759	-1				2009-06-22 07:00:00	160	21.8665	0
2009-06-21 02:45:00	20	-26.8974	2				2009-06-22 08:00:00	160	21.8665	0
2009-06-21 03:15:00	21	-32.2769	5				2009-06-22 09:00:00	160	21.8665	0
2009-06-21 03:30:00	16	-5.37948	-1				2009-06-22 10:00:00	160	21.8665	0
2009-06-21 03:45:00	18	-16.1384	-2				2009-06-22 11:00:00	159	21.6992	-1
2009-06-21 04:15:00	16	-5.37948	-5				2009-06-22 12:00:00	158	21.5323	X
2009-06-21 04:30:00	20	-26.8974	4				2009-06-22 13:00:00	159	21.6992	1
2009-06-21 04:45:00	17	-10.759	-1				2009-06-22 14:00:00	159	21.6992	0
2009-06-21 05:15:00	16	-5.37948	0				2009-06-22 15:00:00	159	21.6992	0
2009-06-21 05:30:00	19	-21.5179	-1				2009-06-22 16:00:00	150	20.2101	-9
2009-06-21 05:45:00	18	-16.1384	1				2009-06-22 17:00:00	143	19.0704	-7
2009-06-21 06:15:00	19	-21.5179	X				2009-06-22 18:00:00	154	20.8684	X
2009-06-21 06:30:00	18	-16.1384	X				2009-06-22 19:00:00	153	20.7033	-1
2009-06-21 06:45:00	21	-32.2769	X				2009-06-22 20:00:00	149	20.0463	-4
2009-06-21 07:15:00	19	-21.5179	0				2009-06-22 21:00:00	154	20.8684	5
2009-06-21 07:30:00	19	-21.5179	1				2009-06-22 22:00:00	153	20.7033	-1
2009-06-21 07:45:00	17	-10.759	-4				2009-06-22 23:00:00	140	18.5863	-13
2009-06-21 08:15:00	19	-21.5179	0				2009-06-23 00:30:00	142	18.9088	X
2009-06-21 08:30:00	18	-16.1384	-1				2009-06-23 01:30:00	149	20.0463	7
2009-06-21 08:45:00	23	-43.0358	6				2009-06-23 02:30:00	154	20.8684	5
2009-06-21 09:15:00	20	-26.8974	1				2009-06-23 03:30:00	154	20.8684	0
2009-06-21 09:30:00	21	-32.2769	3				2009-06-23 04:30:00	155	21.0338	1
2009-06-21 09:45:00	17	-10.759	-6				2009-06-23 05:30:00	155	21.0338	0
2009-06-21 10:15:00	18	-16.1384	-2				2009-06-23 06:30:00	155	21.0338	X
2009-06-21 10:30:00	20	-26.8974	-1				2009-06-23 07:30:00	156	21.1996	1
2009-06-21 10:45:00	19	-21.5179	2				2009-06-23 08:30:00	156	21.1996	0
2009-06-21 11:15:00	17	-10.759	-1				2009-06-23 09:30:00	156	21.1996	0
2009-06-21 11:30:00	19	-21.5179	-1				2009-06-23 10:30:00	156	21.1996	0
2009-06-21 11:45:00	17	-10.759	-2				2009-06-23 11:30:00	156	21.1996	0
2009-06-21 12:15:00	17	-10.759	X				2009-06-23 12:30:00	156	21.1996	X
2009-06-21 12:30:00	17	-10.759	X				2009-06-23 13:30:00	156	21.1996	0
2009-06-21 12:45:00	18	-16.1384	X				2009-06-23 14:30:00	156	21.1996	0
2009-06-21 13:15:00	19	-21.5179	2				2009-06-23 15:30:00	146	19.557	-10
2009-06-21 13:30:00	21	-32.2769	4				2009-06-23 16:30:00	156	21.1996	10
2009-06-21 13:45:00	21	-32.2769	3				2009-06-23 17:30:00	156	21.1996	0
2009-06-21 14:15:00	20	-26.8974	1				2009-06-23 18:30:00	139	18.4255	X
2009-06-21 14:30:00	17	-10.759	-4				2009-06-23 19:30:00	155	21.0338	16
2009-06-21 14:45:00	52	-199.041	31	-199.041			2009-06-23 20:30:00	157	21.3657	2
2009-06-21 15:15:00	20	-26.8974	0				2009-06-23 21:30:00	144	19.2323	-13
2009-06-21 15:30:00	18	-16.1384	1				2009-06-23 22:30:00	156	21.1996	12
2009-06-21 15:45:00	20	-26.8974	-32		-26.8974		2009-06-23 23:30:00	156	21.1996	0
2009-06-21 16:15:00	16	-5.37948	-4				2009-06-24 00:30:00	147	19.7198	X
2009-06-21 16:30:00	22	-37.6564	4				2009-06-24 00:45:00	153	20.7033	X
2009-06-21 16:45:00	16	-5.37948	-4				2009-06-24 01:30:00	155	21.0338	8
2009-06-21 17:15:00	24	-48.4153	8				2009-06-24 01:45:00	155	21.0338	2
2009-06-21 17:30:00	18	-16.1384	-4				2009-06-24 02:30:00	155	21.0338	0
2009-06-21 17:45:00	16	-5.37948	0				2009-06-24 02:45:00	155	21.0338	0
2009-06-21 18:15:00	18	-16.1384	X				2009-06-24 03:30:00	155	21.0338	0
2009-06-21 18:30:00	22	-37.6564	X				2009-06-24 03:45:00	155	21.0338	0
2009-06-21 18:45:00	16	-5.37948	X				2009-06-24 04:30:00	155	21.0338	0
2009-06-21 19:15:00	25	-53.7948	7				2009-06-24 04:45:00	155	21.0338	0
2009-06-21 19:30:00	18	-16.1384	-4				2009-06-24 05:30:00	155	21.0338	0
2009-06-21 19:45:00	19	-21.5179	3				2009-06-24 05:45:00	155	21.0338	0
2009-06-21 20:15:00	19	-21.5179	-6				2009-06-24 06:30:00	156	21.1996	X
2009-06-21 20:30:00	18	-16.1384	0				2009-06-24 06:45:00	156	21.1996	X
2009-06-21 20:45:00	17	-10.759	-2				2009-06-24 07:30:00	155	21.0338	-1
2009-06-21 21:15:00	18	-16.1384	-1				2009-06-24 07:45:00	155	21.0338	-1
2009-06-21 21:30:00	25	-53.7948	7				2009-06-24 08:30:00	155	21.0338	0
2009-06-21 21:45:00	20	-26.8974	3				2009-06-24 08:45:00	155	21.0338	0
2009-06-21 22:15:00	19	-21.5179	1				2009-06-24 09:30:00	155	21.0338	0
2009-06-21 22:30:00	17	-10.759	-8				2009-06-24 09:45:00	153	20.7033	-2
2009-06-21 22:45:00	19	-21.5179	-1				2009-06-24 10:30:00	155	21.0338	0
2009-06-21 23:15:00	23	-43.0358	4				2009-06-24 10:45:00	155	21.0338	2
2009-06-21 23:30:00	17	-10.759	0				2009-06-24 11:30:00	152	20.5385	-3
2009-06-21 23:45:00	17	-10.759	-2				2009-06-24 11:45:00	154	20.8684	-1
2009-06-22 00:45:00	22	-37.6564	X				2009-06-24 12:30:00	152	20.5385	X
2009-06-22 01:45:00	18	-16.1384	-4				2009-06-24 12:45:00	153	20.7033	X
2009-06-22 02:45:00	16	-5.37948	-2				2009-06-24 13:30:00	154	20.8684	2
2009-06-22 03:45:00	17	-10.759	1				2009-06-24 13:45:00	151	20.3741	-2
2009-06-22 04:45:00	21	-32.2769	4				2009-06-24 14:30:00	153	20.7033	-1
2009-06-22 05:45:00	18	-16.1384	-3				2009-06-24 14:45:00	153	20.7033	2
2009-06-22 06:45:00	18	-16.1384	X				2009-06-24 15:30:00	153	20.7033	0
2009-06-22 07:45:00	18	-16.1384	0				2009-06-24 15:45:00	152	20.5385	-1
2009-06-22 08:45:00	20	-26.8974	2				2009-06-24 16:30:00	152	20.5385	-1
2009-06-22 09:45:00	19	-21.5179	-1				2009-06-24 16:45:00	152	20.5385	0
2009-06-22 10:45:00	19	-21.5179	0				2009-06-24 17:30:00	149	20.0463	-3
2009-06-22 11:45:00	22	-37.6564	3				2009-06-24 17:45:00	152	20.5385	0
2009-06-22 12:45:00	18	-16.1384	X				2009-06-24 18:30:00	152	20.5385	X
2009-06-22 13:45:00	21	-32.2769	3				2009-06-24 18:45:00	152	20.5385	X
2009-06-22 14:45:00	22	-37.6564	1				2009-06-24 19:30:00	152	20.5385	0
2009-06-22 15:45:00	21	-32.2769	-1				2009-06-24 19:45:00	151	20.3741	-1
2009-06-22 16:45:00	21	-32.2769	0				2009-06-24 20:30:00	151	20.3741	-1
2009-06-22 17:45:00	19	-21.5179	-2				2009-06-24 20:45:00	148	19.8829	-3
2009-06-22 18:45:00	21	-32.2769	X				2009-06-24 21:30:00	151	20.3741	0
2009-06-22 19:45:00	17	-10.759	-4				2009-06-24 21:45:00	150	20.2101	2
2009-06-22 20:45:00	27	-64.5538	10				2009-06-24 22:30:00	144	19.2323	-7
2009-06-22 21:45:00	19	-21.5179	-8				2009-06-24 22:45:00	145	19.3945	-5
2009-06-22 22:45:00	20	-26.8974	1				2009-06-24 23:30:00	112	14.1581	-32		14.1581
2009-06-22 23:45:00	20	-26.8974	0				2009-06-24 23:45:00	152	20.5385	7
2009-06-23 00:45:00	20	-26.8974	X				2009-06-25 00:15:00	149	20.0463	X
2009-06-23 01:45:00	21	-32.2769	1				2009-06-25 01:15:00	152	20.5385	3
2009-06-23 02:45:00	16	-5.37948	-5				2009-06-25 02:15:00	153	20.7033	1
2009-06-23 03:45:00	20	-26.8974	4				2009-06-25 03:15:00	152	20.5385	-1
2009-06-23 04:45:00	21	-32.2769	1				2009-06-25 04:15:00	152	20.5385	0
2009-06-23 05:45:00	18	-16.1384	-3				2009-06-25 05:15:00	152	20.5385	0
2009-06-23 06:45:00	19	-21.5179	X				2009-06-25 06:15:00	152	20.5385	X
2009-06-23 07:45:00	20	-26.8974	1				2009-06-25 07:15:00	152	20.5385	0
2009-06-23 08:45:00	23	-43.0358	3				2009-06-25 08:15:00	152	20.5385	0
2009-06-23 09:45:00	24	-48.4153	1				2009-06-25 09:15:00	148	19.8829	-4
2009-06-23 10:45:00	21	-32.2769	-3				2009-06-25 10:15:00	150	20.2101	2
2009-06-23 11:45:00	20	-26.8974	-1				2009-06-25 11:15:00	151	20.3741	1
2009-06-23 12:45:00	20	-26.8974	X				2009-06-25 12:15:00	151	20.3741	X
2009-06-23 13:45:00	17	-10.759	-3				2009-06-25 13:15:00	151	20.3741	0
2009-06-23 14:45:00	16	-5.37948	-1				2009-06-25 14:15:00	152	20.5385	1
2009-06-23 15:45:00	17	-10.759	1				2009-06-25 15:15:00	152	20.5385	0
2009-06-23 16:45:00	22	-37.6564	5				2009-06-25 16:15:00	152	20.5385	0
2009-06-23 17:45:00	22	-37.6564	0				2009-06-25 17:15:00	152	20.5385	0
2009-06-23 18:45:00	22	-37.6564	X				2009-06-25 18:15:00	153	20.7033	X
2009-06-23 19:45:00	18	-16.1384	-4				2009-06-25 19:15:00	153	20.7033	0
2009-06-23 20:45:00	16	-5.37948	-2				2009-06-25 20:15:00	153	20.7033	0
2009-06-23 21:45:00	24	-48.4153	8				2009-06-25 21:15:00	152	20.5385	-1
2009-06-23 22:45:00	25	-53.7948	1				2009-06-25 22:15:00	152	20.5385	0
2009-06-23 23:45:00	19	-21.5179	-6				2009-06-25 23:15:00	150	20.2101	-2
2009-06-25	17	-10.759	X				2009-06-27	143	19.0704	X
2009-06-25 00:30:00	19	-21.5179	X				2009-06-27 00:15:00	148	19.8829	X
2009-06-25 01:00:00	17	-10.759	0				2009-06-27 01:00:00	154	20.8684	11
2009-06-25 01:30:00	20	-26.8974	1				2009-06-27 01:15:00	152	20.5385	4
2009-06-25 02:00:00	17	-10.759	0				2009-06-27 02:00:00	154	20.8684	0
2009-06-25 02:30:00	16	-5.37948	-4				2009-06-27 02:15:00	154	20.8684	2
2009-06-25 03:00:00	17	-10.759	0				2009-06-27 03:00:00	154	20.8684	0
2009-06-25 03:30:00	17	-10.759	1				2009-06-27 03:15:00	154	20.8684	0
2009-06-25 04:00:00	18	-16.1384	1				2009-06-27 04:00:00	154	20.8684	0
2009-06-25 04:30:00	16	-5.37948	-1				2009-06-27 04:15:00	147	19.7198	-7
2009-06-25 05:00:00	17	-10.759	-1				2009-06-27 05:00:00	154	20.8684	0
2009-06-25 05:30:00	16	-5.37948	0				2009-06-27 05:15:00	154	20.8684	7
2009-06-25 06:00:00	16	-5.37948	X				2009-06-27 06:00:00	155	21.0338	X
2009-06-25 06:30:00	16	-5.37948	X				2009-06-27 06:15:00	154	20.8684	X
2009-06-25 07:00:00	17	-10.759	1				2009-06-27 07:00:00	155	21.0338	0
2009-06-25 07:30:00	17	-10.759	1				2009-06-27 07:15:00	155	21.0338	1
2009-06-25 08:00:00	17	-10.759	0				2009-06-27 08:00:00	155	21.0338	0
2009-06-25 08:30:00	18	-16.1384	1				2009-06-27 08:15:00	155	21.0338	0
2009-06-25 09:00:00	18	-16.1384	1				2009-06-27 09:00:00	153	20.7033	-2
2009-06-25 09:30:00	18	-16.1384	0				2009-06-27 09:15:00	155	21.0338	0
2009-06-25 10:00:00	20	-26.8974	2				2009-06-27 10:00:00	155	21.0338	2
2009-06-25 10:30:00	18	-16.1384	0				2009-06-27 10:15:00	155	21.0338	0
2009-06-25 11:00:00	17	-10.759	-3				2009-06-27 11:00:00	155	21.0338	0
2009-06-25 11:30:00	19	-21.5179	1				2009-06-27 11:15:00	155	21.0338	0
2009-06-25 12:00:00	17	-10.759	X				2009-06-27 12:00:00	155	21.0338	X
2009-06-25 12:30:00	19	-21.5179	X				2009-06-27 12:15:00	155	21.0338	X
2009-06-25 13:00:00	17	-10.759	0				2009-06-27 13:00:00	155	21.0338	0
2009-06-25 13:30:00	19	-21.5179	0				2009-06-27 13:15:00	155	21.0338	0
2009-06-25 14:00:00	18	-16.1384	1				2009-06-27 14:00:00	155	21.0338	0
2009-06-25 14:30:00	19	-21.5179	0				2009-06-27 14:15:00	154	20.8684	-1
2009-06-25 15:00:00	16	-5.37948	-2				2009-06-27 15:00:00	155	21.0338	0
2009-06-25 15:30:00	17	-10.759	-2				2009-06-27 15:15:00	154	20.8684	0
2009-06-25 16:00:00	19	-21.5179	3				2009-06-27 16:00:00	154	20.8684	-1
2009-06-25 16:30:00	18	-16.1384	1				2009-06-27 16:15:00	154	20.8684	0
2009-06-25 17:00:00	17	-10.759	-2				2009-06-27 17:00:00	154	20.8684	0
2009-06-25 17:30:00	16	-5.37948	-2				2009-06-27 17:15:00	154	20.8684	0
2009-06-25 18:00:00	18	-16.1384	X				2009-06-27 18:00:00	154	20.8684	X
2009-06-25 18:30:00	18	-16.1384	X				2009-06-27 18:15:00	154	20.8684	X
2009-06-25 19:00:00	19	-21.5179	1				2009-06-27 19:00:00	156	21.1996	2
2009-06-25 19:30:00	16	-5.37948	-2				2009-06-27 19:15:00	156	21.1996	2
2009-06-25 20:00:00	16	-5.37948	-3				2009-06-27 20:00:00	155	21.0338	-1
2009-06-25 20:30:00	17	-10.759	1				2009-06-27 20:15:00	156	21.1996	0
2009-06-25 21:00:00	18	-16.1384	2				2009-06-27 21:00:00	157	21.3657	2
2009-06-25 21:30:00	16	-5.37948	-1				2009-06-27 21:15:00	156	21.1996	0
2009-06-25 22:00:00	17	-10.759	-1				2009-06-27 22:00:00	157	21.3657	0
2009-06-25 22:30:00	17	-10.759	1				2009-06-27 22:15:00	157	21.3657	1
2009-06-25 23:00:00	20	-26.8974	3				2009-06-27 23:00:00	156	21.1996	-1
2009-06-25 23:30:00	17	-10.759	0				2009-06-27 23:15:00	157	21.3657	0
2009-06-27	21	-32.2769	X				2009-06-29 00:45:00	157	21.3657	X
2009-06-27 01:00:00	18	-16.1384	-3				2009-06-29 01:45:00	154	20.8684	-3
2009-06-27 02:00:00	16	-5.37948	-2				2009-06-29 02:45:00	159	21.6992	5
2009-06-27 03:00:00	17	-10.759	1				2009-06-29 03:45:00	159	21.6992	0
2009-06-27 04:00:00	17	-10.759	0				2009-06-29 04:45:00	157	21.3657	-2
2009-06-27 05:00:00	18	-16.1384	1				2009-06-29 05:45:00	154	20.8684	-3
2009-06-27 06:00:00	19	-21.5179	X				2009-06-29 06:45:00	155	21.0338	X
2009-06-27 07:00:00	19	-21.5179	0				2009-06-29 07:45:00	154	20.8684	-1
2009-06-27 08:00:00	17	-10.759	-2				2009-06-29 08:45:00	154	20.8684	0
2009-06-27 09:00:00	19	-21.5179	2				2009-06-29 09:45:00	154	20.8684	0
2009-06-27 10:00:00	18	-16.1384	-1				2009-06-29 10:45:00	153	20.7033	-1
2009-06-27 11:00:00	18	-16.1384	0				2009-06-29 11:45:00	155	21.0338	2
2009-06-27 12:00:00	19	-21.5179	X				2009-06-29 12:45:00	154	20.8684	X
2009-06-27 13:00:00	18	-16.1384	-1				2009-06-29 13:45:00	154	20.8684	0
2009-06-27 14:00:00	19	-21.5179	1				2009-06-29 14:45:00	154	20.8684	0
2009-06-27 15:00:00	18	-16.1384	-1				2009-06-29 15:45:00	156	21.1996	2
2009-06-27 16:00:00	19	-21.5179	1				2009-06-29 16:45:00	155	21.0338	-1
2009-06-27 17:00:00	19	-21.5179	0				2009-06-29 17:45:00	158	21.5323	3
2009-06-27 18:00:00	19	-21.5179	X				2009-06-29 18:45:00	157	21.3657	X
2009-06-27 19:00:00	16	-5.37948	-3				2009-06-29 19:45:00	158	21.5323	1
2009-06-27 20:00:00	17	-10.759	1				2009-06-29 20:45:00	157	21.3657	-1
2009-06-27 21:00:00	17	-10.759	0				2009-06-29 21:45:00	151	20.3741	-6
2009-06-27 22:00:00	17	-10.759	0				2009-06-29 22:45:00	157	21.3657	6
2009-06-27 23:00:00	20	-26.8974	3				2009-06-29 23:45:00	159	21.6992	2
2009-06-28 00:15:00	17	-10.759	X				2009-06-30 00:30:00	159	21.6992	X
2009-06-28 01:15:00	18	-16.1384	1				2009-06-30 00:45:00	156	21.1996	X
2009-06-28 02:15:00	17	-10.759	-1				2009-06-30 01:30:00	152	20.5385	-7
2009-06-28 03:15:00	16	-5.37948	-1				2009-06-30 01:45:00	159	21.6992	3
2009-06-28 04:15:00	19	-21.5179	3				2009-06-30 02:30:00	159	21.6992	7
2009-06-28 05:15:00	22	-37.6564	3				2009-06-30 02:45:00	161	22.0342	2
2009-06-28 06:15:00	20	-26.8974	X				2009-06-30 03:30:00	160	21.8665	1
2009-06-28 07:15:00	20	-26.8974	0				2009-06-30 03:45:00	159	21.6992	-2
2009-06-28 08:15:00	18	-16.1384	-2				2009-06-30 04:30:00	153	20.7033	-7
2009-06-28 09:15:00	17	-10.759	-1				2009-06-30 04:45:00	159	21.6992	0
2009-06-28 10:15:00	21	-32.2769	4				2009-06-30 05:30:00	153	20.7033	0
2009-06-28 11:15:00	20	-26.8974	-1				2009-06-30 05:45:00	158	21.5323	-1
2009-06-28 12:15:00	17	-10.759	X				2009-06-30 06:30:00	156	21.1996	X
2009-06-28 13:15:00	18	-16.1384	1				2009-06-30 06:45:00	154	20.8684	X
2009-06-28 14:15:00	21	-32.2769	3				2009-06-30 07:30:00	155	21.0338	-1
2009-06-28 15:15:00	20	-26.8974	-1				2009-06-30 07:45:00	156	21.1996	2
2009-06-28 16:15:00	19	-21.5179	-1				2009-06-30 08:30:00	154	20.8684	-1
2009-06-28 17:15:00	18	-16.1384	-1				2009-06-30 08:45:00	154	20.8684	-2
2009-06-28 18:15:00	18	-16.1384	X				2009-06-30 09:30:00	153	20.7033	-1
2009-06-28 19:15:00	21	-32.2769	3				2009-06-30 09:45:00	158	21.5323	4
2009-06-28 20:15:00	21	-32.2769	0				2009-06-30 10:30:00	157	21.3657	4
2009-06-28 21:15:00	20	-26.8974	-1				2009-06-30 10:45:00	156	21.1996	-2
2009-06-28 22:15:00	16	-5.37948	-4				2009-06-30 11:30:00	154	20.8684	-3
2009-06-28 23:15:00	21	-32.2769	5				2009-06-30 11:45:00	155	21.0338	-1
2009-06-29	16	-5.37948	X				2009-06-30 12:30:00	154	20.8684	X
2009-06-29 00:15:00	17	-10.759	X				2009-06-30 12:45:00	158	21.5323	X
2009-06-29 01:00:00	16	-5.37948	0				2009-06-30 13:30:00	158	21.5323	4
2009-06-29 01:15:00	16	-5.37948	-1				2009-06-30 13:45:00	155	21.0338	-3
2009-06-29 02:00:00	16	-5.37948	0				2009-06-30 14:30:00	158	21.5323	0
2009-06-29 02:15:00	16	-5.37948	0				2009-06-30 14:45:00	158	21.5323	3
2009-06-29 03:00:00	16	-5.37948	0				2009-06-30 15:30:00	159	21.6992	1
2009-06-29 03:15:00	16	-5.37948	0				2009-06-30 15:45:00	158	21.5323	0
2009-06-29 04:00:00	16	-5.37948	0				2009-06-30 16:30:00	158	21.5323	-1
2009-06-29 04:15:00	16	-5.37948	0				2009-06-30 16:45:00	158	21.5323	0
2009-06-29 05:00:00	16	-5.37948	0				2009-06-30 17:30:00	159	21.6992	1
2009-06-29 05:15:00	16	-5.37948	0				2009-06-30 17:45:00	159	21.6992	1
2009-06-29 06:00:00	20	-26.8974	X				2009-06-30 18:30:00	159	21.6992	X
2009-06-29 06:15:00	20	-26.8974	X				2009-06-30 18:45:00	159	21.6992	X
2009-06-29 07:00:00	17	-10.759	-3				2009-06-30 19:30:00	159	21.6992	0
2009-06-29 07:15:00	16	-5.37948	-4				2009-06-30 19:45:00	158	21.5323	-1
2009-06-29 08:00:00	20	-26.8974	3				2009-06-30 20:30:00	159	21.6992	0
2009-06-29 08:15:00	18	-16.1384	2				2009-06-30 20:45:00	159	21.6992	1
2009-06-29 09:00:00	17	-10.759	-3				2009-06-30 21:30:00	159	21.6992	0
2009-06-29 09:15:00	19	-21.5179	1				2009-06-30 21:45:00	159	21.6992	0
2009-06-29 10:00:00	19	-21.5179	2				2009-06-30 22:30:00	162	22.2023	3
2009-06-29 10:15:00	17	-10.759	-2				2009-06-30 22:45:00	152	20.5385	-7
2009-06-29 11:00:00	18	-16.1384	-1				2009-06-30 23:30:00	163	22.3708	1
2009-06-29 11:15:00	19	-21.5179	2				2009-06-30 23:45:00	162	22.2023	10
2009-06-29 12:00:00	17	-10.759	X				2009-07-01	158	21.5323	X
2009-06-29 12:15:00	17	-10.759	X				2009-07-01 01:00:00	160	21.8665	2
2009-06-29 13:00:00	21	-32.2769	4				2009-07-01 02:00:00	149	20.0463	-11
2009-06-29 13:15:00	18	-16.1384	1				2009-07-01 03:00:00	159	21.6992	10
2009-06-29 14:00:00	19	-21.5179	-2				2009-07-01 04:00:00	159	21.6992	0
2009-06-29 14:15:00	19	-21.5179	1				2009-07-01 05:00:00	159	21.6992	0
2009-06-29 15:00:00	20	-26.8974	1				2009-07-01 06:00:00	158	21.5323	X
2009-06-29 15:15:00	20	-26.8974	1				2009-07-01 07:00:00	158	21.5323	0
2009-06-29 16:00:00	16	-5.37948	-4				2009-07-01 08:00:00	158	21.5323	0
2009-06-29 16:15:00	17	-10.759	-3				2009-07-01 09:00:00	153	20.7033	-5
2009-06-29 17:00:00	16	-5.37948	0				2009-07-01 10:00:00	158	21.5323	5
2009-06-29 17:15:00	16	-5.37948	-1				2009-07-01 11:00:00	157	21.3657	-1
2009-06-29 18:00:00	16	-5.37948	X				2009-07-01 12:00:00	156	21.1996	X
2009-06-29 18:15:00	16	-5.37948	X				2009-07-01 13:00:00	156	21.1996	0
2009-06-29 19:00:00	16	-5.37948	0				2009-07-01 14:00:00	157	21.3657	1
2009-06-29 19:15:00	16	-5.37948	0				2009-07-01 15:00:00	155	21.0338	-2
2009-06-29 20:00:00	17	-10.759	1				2009-07-01 16:00:00	157	21.3657	2
2009-06-29 20:15:00	16	-5.37948	0				2009-07-01 17:00:00	158	21.5323	1
2009-06-29 21:00:00	16	-5.37948	-1				2009-07-01 18:00:00	158	21.5323	X
2009-06-29 21:15:00	16	-5.37948	0				2009-07-01 19:00:00	158	21.5323	0
2009-06-29 22:00:00	16	-5.37948	0				2009-07-01 20:00:00	158	21.5323	0
2009-06-29 22:15:00	16	-5.37948	0				2009-07-01 21:00:00	159	21.6992	1
2009-06-29 23:00:00	16	-5.37948	0				2009-07-01 22:00:00	159	21.6992	0
2009-06-29 23:15:00	16	-5.37948	0				2009-07-01 23:00:00	160	21.8665	1
2009-06-30	16	-5.37948	X				2009-07-02 00:30:00	158	21.5323	X
2009-06-30 00:15:00	16	-5.37948	X				2009-07-02 00:45:00	154	20.8684	X
2009-06-30 00:45:00	16	-5.37948	X				2009-07-02 01:30:00	154	20.8684	-4
2009-06-30 01:00:00	20	-26.8974	4				2009-07-02 01:45:00	158	21.5323	4
2009-06-30 01:15:00	16	-5.37948	0				2009-07-02 02:30:00	159	21.6992	5
2009-06-30 01:45:00	16	-5.37948	0				2009-07-02 02:45:00	159	21.6992	1
2009-06-30 02:00:00	21	-32.2769	1				2009-07-02 03:30:00	158	21.5323	-1
2009-06-30 02:15:00	16	-5.37948	0				2009-07-02 03:45:00	158	21.5323	-1
2009-06-30 02:45:00	16	-5.37948	0				2009-07-02 04:30:00	158	21.5323	0
2009-06-30 03:00:00	16	-5.37948	-5				2009-07-02 04:45:00	158	21.5323	0
2009-06-30 03:15:00	16	-5.37948	0				2009-07-02 05:30:00	158	21.5323	0
2009-06-30 03:45:00	17	-10.759	1				2009-07-02 05:45:00	156	21.1996	-2
2009-06-30 04:00:00	16	-5.37948	0				2009-07-02 06:30:00	157	21.3657	X
2009-06-30 04:15:00	16	-5.37948	0				2009-07-02 06:45:00	154	20.8684	X
2009-06-30 04:45:00	16	-5.37948	-1				2009-07-02 07:30:00	155	21.0338	-2
2009-06-30 05:00:00	17	-10.759	1				2009-07-02 07:45:00	158	21.5323	4
2009-06-30 05:15:00	20	-26.8974	4				2009-07-02 08:30:00	157	21.3657	2
2009-06-30 05:45:00	16	-5.37948	0				2009-07-02 08:45:00	158	21.5323	0
2009-06-30 06:00:00	16	-5.37948	X				2009-07-02 09:30:00	156	21.1996	-1
2009-06-30 06:15:00	18	-16.1384	X				2009-07-02 09:45:00	155	21.0338	-3
2009-06-30 06:45:00	18	-16.1384	X				2009-07-02 10:30:00	156	21.1996	0
2009-06-30 07:00:00	17	-10.759	1				2009-07-02 10:45:00	156	21.1996	1
2009-06-30 07:15:00	16	-5.37948	-2				2009-07-02 11:30:00	144	19.2323	-12
2009-06-30 07:45:00	18	-16.1384	0				2009-07-02 11:45:00	139	18.4255	-17
2009-06-30 08:00:00	16	-5.37948	-1				2009-07-02 12:30:00	156	21.1996	X
2009-06-30 08:15:00	17	-10.759	1				2009-07-02 12:45:00	155	21.0338	X
2009-06-30 08:45:00	19	-21.5179	1				2009-07-02 13:30:00	156	21.1996	0
2009-06-30 09:00:00	18	-16.1384	2				2009-07-02 13:45:00	156	21.1996	1
2009-06-30 09:15:00	16	-5.37948	-1				2009-07-02 14:30:00	155	21.0338	-1
2009-06-30 09:45:00	17	-10.759	-2				2009-07-02 14:45:00	155	21.0338	-1
2009-06-30 10:00:00	16	-5.37948	-2				2009-07-02 15:30:00	123	15.8825	-32		15.8825
2009-06-30 10:15:00	18	-16.1384	2				2009-07-02 15:45:00	154	20.8684	-1
2009-06-30 10:45:00	17	-10.759	0				2009-07-02 16:30:00	154	20.8684	31	20.8684
2009-06-30 11:00:00	16	-5.37948	0				2009-07-02 16:45:00	156	21.1996	2
2009-06-30 11:15:00	16	-5.37948	-2				2009-07-02 17:30:00	156	21.1996	2
2009-06-30 11:45:00	18	-16.1384	1				2009-07-02 17:45:00	156	21.1996	0
2009-06-30 12:00:00	17	-10.759	X				2009-07-02 18:30:00	155	21.0338	X
2009-06-30 12:15:00	16	-5.37948	X				2009-07-02 18:45:00	153	20.7033	X
2009-06-30 12:45:00	16	-5.37948	X				2009-07-02 19:30:00	152	20.5385	-3
2009-06-30 13:00:00	16	-5.37948	-1				2009-07-02 19:45:00	152	20.5385	-1
2009-06-30 13:15:00	17	-10.759	1				2009-07-02 20:30:00	154	20.8684	2
2009-06-30 13:45:00	19	-21.5179	3				2009-07-02 20:45:00	155	21.0338	3
2009-06-30 14:00:00	16	-5.37948	0				2009-07-02 21:30:00	152	20.5385	-2
2009-06-30 14:15:00	16	-5.37948	-1				2009-07-02 21:45:00	156	21.1996	1
2009-06-30 14:45:00	16	-5.37948	-3				2009-07-02 22:30:00	155	21.0338	3
2009-06-30 15:00:00	16	-5.37948	0				2009-07-02 22:45:00	154	20.8684	-2
2009-06-30 15:15:00	16	-5.37948	0				2009-07-02 23:30:00	147	19.7198	-8
2009-06-30 15:45:00	16	-5.37948	0				2009-07-02 23:45:00	147	19.7198	-7
2009-06-30 16:00:00	16	-5.37948	0				2009-07-03 00:45:00	144	19.2323	X
2009-06-30 16:15:00	16	-5.37948	0				2009-07-03 01:45:00	153	20.7033	9
2009-06-30 16:45:00	16	-5.37948	0				2009-07-03 02:45:00	153	20.7033	0
2009-06-30 17:00:00	16	-5.37948	0				2009-07-03 03:45:00	152	20.5385	-1
2009-06-30 17:15:00	17	-10.759	1				2009-07-03 04:45:00	157	21.3657	5
2009-06-30 17:45:00	16	-5.37948	0				2009-07-03 05:45:00	158	21.5323	1
2009-06-30 18:00:00	16	-5.37948	X				2009-07-03 06:45:00	159	21.6992	X
2009-06-30 18:15:00	16	-5.37948	X				2009-07-03 07:45:00	159	21.6992	0
2009-06-30 18:45:00	16	-5.37948	X				2009-07-03 08:45:00	159	21.6992	0
2009-06-30 19:00:00	16	-5.37948	0				2009-07-03 09:45:00	151	20.3741	-8
2009-06-30 19:15:00	16	-5.37948	0				2009-07-03 10:45:00	156	21.1996	5
2009-06-30 19:45:00	16	-5.37948	0				2009-07-03 11:45:00	159	21.6992	3
2009-06-30 20:00:00	16	-5.37948	0				2009-07-03 12:45:00	159	21.6992	X
2009-06-30 20:15:00	16	-5.37948	0				2009-07-03 13:45:00	159	21.6992	0
2009-06-30 20:45:00	16	-5.37948	0				2009-07-03 14:45:00	159	21.6992	0
2009-06-30 21:00:00	16	-5.37948	0				2009-07-03 15:45:00	158	21.5323	-1
2009-06-30 21:15:00	16	-5.37948	0				2009-07-03 16:45:00	158	21.5323	0
2009-06-30 21:45:00	16	-5.37948	0				2009-07-03 17:45:00	156	21.1996	-2
2009-06-30 22:00:00	16	-5.37948	0				2009-07-03 18:45:00	158	21.5323	X
2009-06-30 22:15:00	16	-5.37948	0				2009-07-03 19:45:00	159	21.6992	1
2009-06-30 22:45:00	16	-5.37948	0				2009-07-03 20:45:00	158	21.5323	-1
2009-06-30 23:00:00	16	-5.37948	0				2009-07-03 21:45:00	163	22.3708	5
2009-06-30 23:15:00	16	-5.37948	0				2009-07-03 22:45:00	136	17.9445	-27
2009-06-30 23:45:00	16	-5.37948	0				2009-07-03 23:45:00	163	22.3708	27
2009-07-01 00:15:00	16	-5.37948	X				2009-07-04 00:45:00	152	20.5385	X
2009-07-01 00:30:00	16	-5.37948	X				2009-07-04 01:45:00	161	22.0342	9
2009-07-01 00:45:00	16	-5.37948	X				2009-07-04 02:45:00	161	22.0342	0
2009-07-01 01:15:00	16	-5.37948	0				2009-07-04 03:45:00	161	22.0342	0
2009-07-01 01:30:00	16	-5.37948	0				2009-07-04 04:45:00	161	22.0342	0
2009-07-01 01:45:00	18	-16.1384	2				2009-07-04 05:45:00	160	21.8665	-1
2009-07-01 02:15:00	16	-5.37948	0				2009-07-04 06:45:00	157	21.3657	X
2009-07-01 02:30:00	17	-10.759	1				2009-07-04 07:45:00	157	21.3657	0
2009-07-01 02:45:00	16	-5.37948	-2				2009-07-04 08:45:00	155	21.0338	-2
2009-07-01 03:15:00	16	-5.37948	0				2009-07-04 09:45:00	157	21.3657	2
2009-07-01 03:30:00	17	-10.759	0				2009-07-04 10:45:00	157	21.3657	0
2009-07-01 03:45:00	16	-5.37948	0				2009-07-04 11:45:00	146	19.557	-11
2009-07-01 04:15:00	16	-5.37948	0				2009-07-04 12:45:00	157	21.3657	X
2009-07-01 04:30:00	16	-5.37948	-1				2009-07-04 13:45:00	157	21.3657	0
2009-07-01 04:45:00	16	-5.37948	0				2009-07-04 14:45:00	157	21.3657	0
2009-07-01 05:15:00	17	-10.759	1				2009-07-04 15:45:00	159	21.6992	2
2009-07-01 05:30:00	17	-10.759	1				2009-07-04 16:45:00	153	20.7033	-6
2009-07-01 05:45:00	17	-10.759	1				2009-07-04 17:45:00	158	21.5323	5
2009-07-01 06:15:00	17	-10.759	X				2009-07-04 18:45:00	158	21.5323	X
2009-07-01 06:30:00	17	-10.759	X				2009-07-04 19:45:00	159	21.6992	1
2009-07-01 06:45:00	16	-5.37948	X				2009-07-04 20:45:00	158	21.5323	-1
2009-07-01 07:15:00	17	-10.759	0				2009-07-04 21:45:00	160	21.8665	2
2009-07-01 07:30:00	18	-16.1384	1				2009-07-04 22:45:00	150	20.2101	-10
2009-07-01 07:45:00	18	-16.1384	2				2009-07-04 23:45:00	157	21.3657	7
2009-07-01 08:15:00	18	-16.1384	1				2009-07-05 00:45:00	151	20.3741	X
2009-07-01 08:30:00	17	-10.759	-1				2009-07-05 01:45:00	156	21.1996	5
2009-07-01 08:45:00	16	-5.37948	-2				2009-07-05 02:45:00	155	21.0338	-1
2009-07-01 09:15:00	16	-5.37948	-2				2009-07-05 03:45:00	156	21.1996	1
2009-07-01 09:30:00	17	-10.759	0				2009-07-05 04:45:00	151	20.3741	-5
2009-07-01 09:45:00	16	-5.37948	0				2009-07-05 05:45:00	154	20.8684	3
2009-07-01 10:15:00	16	-5.37948	0				2009-07-05 06:45:00	154	20.8684	X
2009-07-01 10:30:00	16	-5.37948	-1				2009-07-05 07:45:00	155	21.0338	1
2009-07-01 10:45:00	18	-16.1384	2				2009-07-05 08:45:00	156	21.1996	1
2009-07-01 11:15:00	17	-10.759	1				2009-07-05 09:45:00	155	21.0338	-1
2009-07-01 11:30:00	17	-10.759	1				2009-07-05 10:45:00	158	21.5323	3
2009-07-01 11:45:00	16	-5.37948	-2				2009-07-05 11:45:00	160	21.8665	2
2009-07-01 12:15:00	17	-10.759	X				2009-07-05 12:45:00	159	21.6992	X
2009-07-01 12:30:00	16	-5.37948	X				2009-07-05 13:45:00	158	21.5323	-1
2009-07-01 12:45:00	17	-10.759	X				2009-07-05 14:45:00	159	21.6992	1
2009-07-01 13:15:00	17	-10.759	0				2009-07-05 15:45:00	159	21.6992	0
2009-07-01 13:30:00	16	-5.37948	0				2009-07-05 16:45:00	159	21.6992	0
2009-07-01 13:45:00	17	-10.759	0				2009-07-05 17:45:00	160	21.8665	1
2009-07-01 14:15:00	16	-5.37948	-1				2009-07-05 18:45:00	161	22.0342	X
2009-07-01 14:30:00	17	-10.759	1				2009-07-05 19:45:00	161	22.0342	0
2009-07-01 14:45:00	17	-10.759	0				2009-07-05 20:45:00	165	22.709	4
2009-07-01 15:15:00	19	-21.5179	3				2009-07-05 21:45:00	165	22.709	0
2009-07-01 15:30:00	16	-5.37948	-1				2009-07-05 22:45:00	148	19.8829	-17
2009-07-01 15:45:00	17	-10.759	0				2009-07-05 23:45:00	163	22.3708	15
2009-07-01 16:15:00	17	-10.759	-2				2009-07-07	152	20.5385	X
2009-07-01 16:30:00	17	-10.759	1				2009-07-07 00:15:00	150	20.2101	X
2009-07-01 16:45:00	16	-5.37948	-1				2009-07-07 00:30:00	153	20.7033	X
2009-07-01 17:15:00	20	-26.8974	3				2009-07-07 00:45:00	152	20.5385	X
2009-07-01 17:30:00	16	-5.37948	-1				2009-07-07 01:00:00	152	20.5385	0
2009-07-01 17:45:00	16	-5.37948	0				2009-07-07 01:15:00	150	20.2101	0
2009-07-01 18:15:00	22	-37.6564	X				2009-07-07 01:30:00	147	19.7198	-6
2009-07-01 18:30:00	17	-10.759	X				2009-07-07 01:45:00	156	21.1996	4
2009-07-01 18:45:00	17	-10.759	X				2009-07-07 02:00:00	144	19.2323	-8
2009-07-01 19:15:00	17	-10.759	-5				2009-07-07 02:15:00	158	21.5323	8
2009-07-01 19:30:00	18	-16.1384	1				2009-07-07 02:30:00	161	22.0342	14
2009-07-01 19:45:00	16	-5.37948	-1				2009-07-07 02:45:00	155	21.0338	-1
2009-07-01 20:15:00	16	-5.37948	-1				2009-07-07 03:00:00	154	20.8684	10
2009-07-01 20:30:00	17	-10.759	-1				2009-07-07 03:15:00	155	21.0338	-3
2009-07-01 20:45:00	16	-5.37948	0				2009-07-07 03:30:00	156	21.1996	-5
2009-07-01 21:15:00	17	-10.759	1				2009-07-07 03:45:00	157	21.3657	2
2009-07-01 21:30:00	16	-5.37948	-1				2009-07-07 04:00:00	140	18.5863	-14
2009-07-01 21:45:00	16	-5.37948	0				2009-07-07 04:15:00	152	20.5385	-3
2009-07-01 22:15:00	16	-5.37948	-1				2009-07-07 04:30:00	150	20.2101	-6
2009-07-01 22:30:00	21	-32.2769	5				2009-07-07 04:45:00	126	16.3555	-31
2009-07-01 22:45:00	16	-5.37948	0				2009-07-07 05:00:00	155	21.0338	15
2009-07-01 23:15:00	16	-5.37948	0				2009-07-07 05:15:00	154	20.8684	2
2009-07-01 23:30:00	17	-10.759	-4				2009-07-07 05:30:00	143	19.0704	-7
2009-07-01 23:45:00	16	-5.37948	0				2009-07-07 05:45:00	157	21.3657	31	21.3657
2009-07-02 00:15:00	16	-5.37948	X				2009-07-07 06:00:00	161	22.0342	X
2009-07-02 00:45:00	20	-26.8974	X				2009-07-07 06:15:00	159	21.6992	X
2009-07-02 01:15:00	17	-10.759	1				2009-07-07 06:30:00	156	21.1996	X
2009-07-02 01:45:00	16	-5.37948	-4				2009-07-07 06:45:00	159	21.6992	X
2009-07-02 02:15:00	17	-10.759	0				2009-07-07 07:00:00	159	21.6992	-2
2009-07-02 02:45:00	16	-5.37948	0				2009-07-07 07:15:00	158	21.5323	-1
2009-07-02 03:15:00	17	-10.759	0				2009-07-07 07:30:00	156	21.1996	0
2009-07-02 03:45:00	17	-10.759	1				2009-07-07 07:45:00	156	21.1996	-3
2009-07-02 04:15:00	17	-10.759	0				2009-07-07 08:00:00	155	21.0338	-4
2009-07-02 04:45:00	17	-10.759	0				2009-07-07 08:15:00	155	21.0338	-3
2009-07-02 05:15:00	17	-10.759	0				2009-07-07 08:30:00	156	21.1996	0
2009-07-02 05:45:00	17	-10.759	0				2009-07-07 08:45:00	154	20.8684	-2
2009-07-02 06:15:00	17	-10.759	X				2009-07-07 09:00:00	157	21.3657	2
2009-07-02 06:45:00	18	-16.1384	X				2009-07-07 09:15:00	157	21.3657	2
2009-07-02 07:15:00	18	-16.1384	1				2009-07-07 09:30:00	156	21.1996	0
2009-07-02 07:45:00	16	-5.37948	-2				2009-07-07 09:45:00	157	21.3657	3
2009-07-02 08:15:00	17	-10.759	-1				2009-07-07 10:00:00	158	21.5323	1
2009-07-02 08:45:00	17	-10.759	1				2009-07-07 10:15:00	158	21.5323	1
2009-07-02 09:15:00	16	-5.37948	-1				2009-07-07 10:30:00	157	21.3657	1
2009-07-02 09:45:00	18	-16.1384	1				2009-07-07 10:45:00	155	21.0338	-2
2009-07-02 10:15:00	17	-10.759	1				2009-07-07 11:00:00	157	21.3657	-1
2009-07-02 10:45:00	17	-10.759	-1				2009-07-07 11:15:00	156	21.1996	-2
2009-07-02 11:15:00	18	-16.1384	1				2009-07-07 11:30:00	158	21.5323	1
2009-07-02 11:45:00	18	-16.1384	1				2009-07-07 11:45:00	156	21.1996	1
2009-07-02 12:15:00	16	-5.37948	X				2009-07-07 12:00:00	159	21.6992	X
2009-07-02 12:45:00	17	-10.759	X				2009-07-07 12:15:00	159	21.6992	X
2009-07-02 13:15:00	18	-16.1384	2				2009-07-07 12:30:00	156	21.1996	X
2009-07-02 13:45:00	17	-10.759	0				2009-07-07 12:45:00	158	21.5323	X
2009-07-02 14:15:00	17	-10.759	-1				2009-07-07 13:00:00	153	20.7033	-6
2009-07-02 14:45:00	17	-10.759	0				2009-07-07 13:15:00	159	21.6992	0
2009-07-02 15:15:00	17	-10.759	0				2009-07-07 13:30:00	158	21.5323	2
2009-07-02 15:45:00	16	-5.37948	-1				2009-07-07 13:45:00	157	21.3657	-1
2009-07-02 16:15:00	17	-10.759	0				2009-07-07 14:00:00	155	21.0338	2
2009-07-02 16:45:00	17	-10.759	1				2009-07-07 14:15:00	158	21.5323	-1
2009-07-02 17:15:00	16	-5.37948	-1				2009-07-07 14:30:00	160	21.8665	2
2009-07-02 17:45:00	18	-16.1384	1				2009-07-07 14:45:00	149	20.0463	-8
2009-07-02 18:15:00	17	-10.759	X				2009-07-07 15:00:00	159	21.6992	4
2009-07-02 18:45:00	18	-16.1384	X				2009-07-07 15:15:00	161	22.0342	3
2009-07-02 19:15:00	19	-21.5179	2				2009-07-07 15:30:00	164	22.5397	4
2009-07-02 19:45:00	19	-21.5179	1				2009-07-07 15:45:00	165	22.709	16
2009-07-02 20:15:00	16	-5.37948	-3				2009-07-07 16:00:00	164	22.5397	5
2009-07-02 20:45:00	16	-5.37948	-3				2009-07-07 16:15:00	164	22.5397	3
2009-07-02 21:15:00	16	-5.37948	0				2009-07-07 16:30:00	160	21.8665	-4
2009-07-02 21:45:00	16	-5.37948	0				2009-07-07 16:45:00	164	22.5397	-1
2009-07-02 22:15:00	18	-16.1384	2				2009-07-07 17:00:00	164	22.5397	0
2009-07-02 22:45:00	16	-5.37948	0				2009-07-07 17:15:00	163	22.3708	-1
2009-07-02 23:15:00	16	-5.37948	-2				2009-07-07 17:30:00	162	22.2023	2
2009-07-02 23:45:00	19	-21.5179	3				2009-07-07 17:45:00	160	21.8665	-4
2009-07-03 00:15:00	21	-32.2769	X				2009-07-07 18:00:00	161	22.0342	X
2009-07-03 01:15:00	17	-10.759	-4				2009-07-07 18:15:00	160	21.8665	X
2009-07-03 02:15:00	16	-5.37948	-1				2009-07-07 18:30:00	159	21.6992	X
2009-07-03 03:15:00	16	-5.37948	0				2009-07-07 18:45:00	159	21.6992	X
2009-07-03 04:15:00	16	-5.37948	0				2009-07-07 19:00:00	159	21.6992	-2
2009-07-03 05:15:00	17	-10.759	1				2009-07-07 19:15:00	156	21.1996	-4
2009-07-03 06:15:00	16	-5.37948	X				2009-07-07 19:30:00	160	21.8665	1
2009-07-03 07:15:00	18	-16.1384	2				2009-07-07 19:45:00	160	21.8665	1
2009-07-03 08:15:00	16	-5.37948	-2				2009-07-07 20:00:00	160	21.8665	1
2009-07-03 09:15:00	16	-5.37948	0				2009-07-07 20:15:00	159	21.6992	3
2009-07-03 10:15:00	16	-5.37948	0				2009-07-07 20:30:00	161	22.0342	1
2009-07-03 11:15:00	17	-10.759	1				2009-07-07 20:45:00	161	22.0342	1
2009-07-03 12:15:00	18	-16.1384	X				2009-07-07 21:00:00	163	22.3708	3
2009-07-03 13:15:00	16	-5.37948	-2				2009-07-07 21:15:00	151	20.3741	-8
2009-07-03 14:15:00	19	-21.5179	3				2009-07-07 21:30:00	163	22.3708	2
2009-07-03 15:15:00	18	-16.1384	-1				2009-07-07 21:45:00	161	22.0342	0
2009-07-03 16:15:00	17	-10.759	-1				2009-07-07 22:00:00	163	22.3708	0
2009-07-03 17:15:00	17	-10.759	0				2009-07-07 22:15:00	164	22.5397	13
2009-07-03 18:15:00	16	-5.37948	X				2009-07-07 22:30:00	156	21.1996	-7
2009-07-03 19:15:00	16	-5.37948	0				2009-07-07 22:45:00	149	20.0463	-12
2009-07-03 20:15:00	16	-5.37948	0				2009-07-07 23:00:00	173	24.0794	10
2009-07-03 21:15:00	20	-26.8974	4				2009-07-07 23:15:00	166	22.8787	2
2009-07-03 22:15:00	16	-5.37948	-4				2009-07-07 23:30:00	134	17.625	-22
2009-07-03 23:15:00	16	-5.37948	0				2009-07-07 23:45:00	166	22.8787	17
2009-07-05	17	-10.759	X				2009-07-08 00:15:00	164	22.5397	X
2009-07-05 00:45:00	18	-16.1384	X				2009-07-08 00:45:00	173	24.0794	X
2009-07-05 01:00:00	28	-69.9332	11				2009-07-08 01:15:00	169	23.3906	5
2009-07-05 01:45:00	16	-5.37948	-2				2009-07-08 01:45:00	164	22.5397	-9
2009-07-05 02:00:00	16	-5.37948	-12				2009-07-08 02:15:00	166	22.8787	-3
2009-07-05 02:45:00	16	-5.37948	0				2009-07-08 02:45:00	165	22.709	1
2009-07-05 03:00:00	17	-10.759	1				2009-07-08 03:15:00	163	22.3708	-3
2009-07-05 03:45:00	16	-5.37948	0				2009-07-08 03:45:00	166	22.8787	1
2009-07-05 04:00:00	18	-16.1384	1				2009-07-08 04:15:00	163	22.3708	0
2009-07-05 04:45:00	18	-16.1384	2				2009-07-08 04:45:00	166	22.8787	0
2009-07-05 05:00:00	17	-10.759	-1				2009-07-08 05:15:00	175	24.4266	12
2009-07-05 05:45:00	16	-5.37948	-2				2009-07-08 05:45:00	167	23.0489	1
2009-07-05 06:00:00	16	-5.37948	X				2009-07-08 06:15:00	172	23.9065	X
2009-07-05 06:45:00	17	-10.759	X				2009-07-08 06:45:00	169	23.3906	X
2009-07-05 07:00:00	17	-10.759	1				2009-07-08 07:15:00	171	23.7341	-1
2009-07-05 07:45:00	17	-10.759	0				2009-07-08 07:45:00	170	23.5621	1
2009-07-05 08:00:00	17	-10.759	0				2009-07-08 08:15:00	172	23.9065	1
2009-07-05 08:45:00	16	-5.37948	-1				2009-07-08 08:45:00	165	22.709	-5
2009-07-05 09:00:00	18	-16.1384	1				2009-07-08 09:15:00	171	23.7341	-1
2009-07-05 09:45:00	18	-16.1384	2				2009-07-08 09:45:00	171	23.7341	6
2009-07-05 10:00:00	18	-16.1384	0				2009-07-08 10:15:00	163	22.3708	-8
2009-07-05 10:45:00	18	-16.1384	0				2009-07-08 10:45:00	167	23.0489	-4
2009-07-05 11:00:00	18	-16.1384	0				2009-07-08 11:15:00	164	22.5397	1
2009-07-05 11:45:00	17	-10.759	-1				2009-07-08 11:45:00	169	23.3906	2
2009-07-05 12:00:00	17	-10.759	X				2009-07-08 12:15:00	167	23.0489	X
2009-07-05 12:45:00	18	-16.1384	X				2009-07-08 12:45:00	169	23.3906	X
2009-07-05 13:00:00	17	-10.759	0				2009-07-08 13:15:00	171	23.7341	4
2009-07-05 13:45:00	17	-10.759	-1				2009-07-08 13:45:00	173	24.0794	4
2009-07-05 14:00:00	17	-10.759	0				2009-07-08 14:15:00	154	20.8684	-17
2009-07-05 14:45:00	17	-10.759	0				2009-07-08 14:45:00	169	23.3906	-4
2009-07-05 15:00:00	17	-10.759	0				2009-07-08 15:15:00	170	23.5621	16
2009-07-05 15:45:00	17	-10.759	0				2009-07-08 15:45:00	155	21.0338	-14
2009-07-05 16:00:00	16	-5.37948	-1				2009-07-08 16:15:00	175	24.4266	5
2009-07-05 16:45:00	18	-16.1384	1				2009-07-08 16:45:00	176	24.601	21
2009-07-05 17:00:00	17	-10.759	1				2009-07-08 17:15:00	172	23.9065	-3
2009-07-05 17:45:00	18	-16.1384	0				2009-07-08 17:45:00	172	23.9065	-4
2009-07-05 18:00:00	17	-10.759	X				2009-07-08 18:15:00	176	24.601	X
2009-07-05 18:45:00	16	-5.37948	X				2009-07-08 18:45:00	169	23.3906	X
2009-07-05 19:00:00	16	-5.37948	-1				2009-07-08 19:15:00	149	20.0463	-27
2009-07-05 19:45:00	17	-10.759	1				2009-07-08 19:45:00	137	18.1046	-32		18.1046
2009-07-05 20:00:00	16	-5.37948	0				2009-07-08 20:15:00	174	24.2528	25
2009-07-05 20:45:00	16	-5.37948	-1				2009-07-08 20:45:00	162	22.2023	25
2009-07-05 21:00:00	16	-5.37948	0				2009-07-08 21:15:00	176	24.601	2
2009-07-05 21:45:00	16	-5.37948	0				2009-07-08 21:45:00	180	25.3034	18
2009-07-05 22:00:00	16	-5.37948	0				2009-07-08 22:15:00	182	25.6577	6
2009-07-05 22:45:00	24	-48.4153	8				2009-07-08 22:45:00	148	19.8829	-32		19.8829
2009-07-05 23:00:00	18	-16.1384	2				2009-07-08 23:15:00	173	24.0794	-9
2009-07-05 23:45:00	16	-5.37948	-8				2009-07-08 23:45:00	169	23.3906	21
2009-07-07 00:45:00	16	-5.37948	X				2009-07-09	175	24.4266	X
2009-07-07 01:45:00	16	-5.37948	0				2009-07-09 01:00:00	143	19.0704	-32		19.0704
2009-07-07 02:45:00	16	-5.37948	0				2009-07-09 02:00:00	165	22.709	22
2009-07-07 03:45:00	16	-5.37948	0				2009-07-09 03:00:00	174	24.2528	9
2009-07-07 04:45:00	21	-32.2769	5				2009-07-09 04:00:00	174	24.2528	0
2009-07-07 05:45:00	16	-5.37948	-5				2009-07-09 05:00:00	173	24.0794	-1
2009-07-07 06:45:00	16	-5.37948	X				2009-07-09 06:00:00	173	24.0794	X
2009-07-07 07:45:00	16	-5.37948	0				2009-07-09 07:00:00	172	23.9065	-1
2009-07-07 08:45:00	18	-16.1384	2				2009-07-09 08:00:00	166	22.8787	-6
2009-07-07 09:45:00	16	-5.37948	-2				2009-07-09 09:00:00	173	24.0794	7
2009-07-07 10:45:00	16	-5.37948	0				2009-07-09 10:00:00	173	24.0794	0
2009-07-07 11:45:00	16	-5.37948	0				2009-07-09 11:00:00	172	23.9065	-1
2009-07-07 12:45:00	16	-5.37948	X				2009-07-09 12:00:00	172	23.9065	X
2009-07-07 13:45:00	16	-5.37948	0				2009-07-09 13:00:00	171	23.7341	-1
2009-07-07 14:45:00	17	-10.759	1				2009-07-09 14:00:00	172	23.9065	1
2009-07-07 15:45:00	16	-5.37948	-1				2009-07-09 15:00:00	172	23.9065	0
2009-07-07 16:45:00	16	-5.37948	0				2009-07-09 16:00:00	161	22.0342	-11
2009-07-07 17:45:00	16	-5.37948	0				2009-07-09 17:00:00	139	18.4255	-22
2009-07-07 18:45:00	16	-5.37948	X				2009-07-09 18:00:00	171	23.7341	X
2009-07-07 19:45:00	16	-5.37948	0				2009-07-09 19:00:00	171	23.7341	0
2009-07-07 20:45:00	18	-16.1384	2				2009-07-09 20:00:00	172	23.9065	1
2009-07-07 21:45:00	16	-5.37948	-2				2009-07-09 21:00:00	172	23.9065	0
2009-07-07 22:45:00	25	-53.7948	9				2009-07-09 22:00:00	172	23.9065	0
2009-07-07 23:45:00	16	-5.37948	-9				2009-07-09 23:00:00	158	21.5323	-14
2009-07-08 00:15:00	16	-5.37948	X				2009-07-10 00:30:00	171	23.7341	X
2009-07-08 00:45:00	16	-5.37948	X				2009-07-10 01:30:00	140	18.5863	-31
2009-07-08 01:15:00	16	-5.37948	0				2009-07-10 02:30:00	154	20.8684	14
2009-07-08 01:45:00	16	-5.37948	0				2009-07-10 03:30:00	169	23.3906	15
2009-07-08 02:15:00	16	-5.37948	0				2009-07-10 04:30:00	168	23.2195	-1
2009-07-08 02:45:00	16	-5.37948	0				2009-07-10 05:30:00	170	23.5621	2
2009-07-08 03:15:00	16	-5.37948	0				2009-07-10 06:30:00	171	23.7341	X
2009-07-08 03:45:00	16	-5.37948	0				2009-07-10 07:30:00	169	23.3906	-2
2009-07-08 04:15:00	16	-5.37948	0				2009-07-10 08:30:00	169	23.3906	0
2009-07-08 04:45:00	16	-5.37948	0				2009-07-10 09:30:00	169	23.3906	0
2009-07-08 05:15:00	16	-5.37948	0				2009-07-10 10:30:00	170	23.5621	1
2009-07-08 05:45:00	17	-10.759	1				2009-07-10 11:30:00	170	23.5621	0
2009-07-08 06:15:00	16	-5.37948	X				2009-07-10 12:30:00	162	22.2023	X
2009-07-08 06:45:00	16	-5.37948	X				2009-07-10 13:30:00	172	23.9065	10
2009-07-08 07:15:00	16	-5.37948	0				2009-07-10 14:30:00	171	23.7341	-1
2009-07-08 07:45:00	16	-5.37948	0				2009-07-10 15:30:00	171	23.7341	0
2009-07-08 08:15:00	16	-5.37948	0				2009-07-10 16:30:00	167	23.0489	-4
2009-07-08 08:45:00	16	-5.37948	0				2009-07-10 17:30:00	163	22.3708	-4
2009-07-08 09:15:00	17	-10.759	1				2009-07-10 18:30:00	170	23.5621	X
2009-07-08 09:45:00	17	-10.759	1				2009-07-10 19:30:00	171	23.7341	1
2009-07-08 10:15:00	17	-10.759	0				2009-07-10 20:30:00	150	20.2101	-21
2009-07-08 10:45:00	17	-10.759	0				2009-07-10 21:30:00	161	22.0342	11
2009-07-08 11:15:00	17	-10.759	0				2009-07-10 22:30:00	172	23.9065	11
2009-07-08 11:45:00	16	-5.37948	-1				2009-07-10 23:30:00	168	23.2195	-4
2009-07-08 12:15:00	16	-5.37948	X				2009-07-11	171	23.7341	X
2009-07-08 12:45:00	16	-5.37948	X				2009-07-11 01:00:00	169	23.3906	-2
2009-07-08 13:15:00	16	-5.37948	0				2009-07-11 02:00:00	167	23.0489	-2
2009-07-08 13:45:00	16	-5.37948	0				2009-07-11 03:00:00	168	23.2195	1
2009-07-08 14:15:00	18	-16.1384	2				2009-07-11 04:00:00	155	21.0338	-13
2009-07-08 14:45:00	18	-16.1384	2				2009-07-11 05:00:00	158	21.5323	3
2009-07-08 15:15:00	16	-5.37948	-2				2009-07-11 06:00:00	167	23.0489	X
2009-07-08 15:45:00	16	-5.37948	-2				2009-07-11 07:00:00	163	22.3708	-4
2009-07-08 16:15:00	16	-5.37948	0				2009-07-11 08:00:00	163	22.3708	0
2009-07-08 16:45:00	16	-5.37948	0				2009-07-11 09:00:00	160	21.8665	-3
2009-07-08 17:15:00	18	-16.1384	2				2009-07-11 10:00:00	166	22.8787	6
2009-07-08 17:45:00	16	-5.37948	0				2009-07-11 11:00:00	163	22.3708	-3
2009-07-08 18:15:00	16	-5.37948	X				2009-07-11 12:00:00	148	19.8829	X
2009-07-08 18:45:00	16	-5.37948	X				2009-07-11 13:00:00	163	22.3708	15
2009-07-08 19:15:00	27	-64.5538	11				2009-07-11 14:00:00	161	22.0342	-2
2009-07-08 19:45:00	18	-16.1384	2				2009-07-11 15:00:00	155	21.0338	-6
2009-07-08 20:15:00	16	-5.37948	-11				2009-07-11 16:00:00	163	22.3708	8
2009-07-08 20:45:00	16	-5.37948	-2				2009-07-11 17:00:00	164	22.5397	1
2009-07-08 21:15:00	16	-5.37948	0				2009-07-11 18:00:00	165	22.709	X
2009-07-08 21:45:00	17	-10.759	1				2009-07-11 19:00:00	164	22.5397	-1
2009-07-08 22:15:00	16	-5.37948	0				2009-07-11 20:00:00	164	22.5397	0
2009-07-08 22:45:00	23	-43.0358	6				2009-07-11 21:00:00	163	22.3708	-1
2009-07-08 23:15:00	16	-5.37948	0				2009-07-11 22:00:00	163	22.3708	0
2009-07-08 23:45:00	16	-5.37948	-7				2009-07-11 23:00:00	160	21.8665	-3
2009-07-09	17	-10.759	X				2009-07-12 00:30:00	159	21.6992	X
2009-07-09 00:15:00	20	-26.8974	X				2009-07-12 00:45:00	160	21.8665	X
2009-07-09 00:30:00	16	-5.37948	X				2009-07-12 01:30:00	150	20.2101	-9
2009-07-09 01:00:00	26	-59.1743	9				2009-07-12 01:45:00	145	19.3945	-15
2009-07-09 01:15:00	16	-5.37948	-4				2009-07-12 02:30:00	157	21.3657	7
2009-07-09 01:30:00	16	-5.37948	0				2009-07-12 02:45:00	161	22.0342	16
2009-07-09 02:00:00	16	-5.37948	-10				2009-07-12 03:30:00	160	21.8665	3
2009-07-09 02:15:00	24	-48.4153	8				2009-07-12 03:45:00	160	21.8665	-1
2009-07-09 02:30:00	20	-26.8974	4				2009-07-12 04:30:00	160	21.8665	0
2009-07-09 03:00:00	16	-5.37948	0				2009-07-12 04:45:00	158	21.5323	-2
2009-07-09 03:15:00	20	-26.8974	-4				2009-07-12 05:30:00	136	17.9445	-24
2009-07-09 03:30:00	17	-10.759	-3				2009-07-12 05:45:00	146	19.557	-12
2009-07-09 04:00:00	16	-5.37948	0				2009-07-12 06:30:00	149	20.0463	X
2009-07-09 04:15:00	17	-10.759	-3				2009-07-12 06:45:00	156	21.1996	X
2009-07-09 04:30:00	20	-26.8974	3				2009-07-12 07:30:00	147	19.7198	-2
2009-07-09 05:00:00	16	-5.37948	0				2009-07-12 07:45:00	148	19.8829	-8
2009-07-09 05:15:00	16	-5.37948	-1				2009-07-12 08:30:00	164	22.5397	17
2009-07-09 05:30:00	16	-5.37948	-4				2009-07-12 08:45:00	154	20.8684	6
2009-07-09 06:00:00	16	-5.37948	X				2009-07-12 09:30:00	154	20.8684	-10
2009-07-09 06:15:00	16	-5.37948	X				2009-07-12 09:45:00	164	22.5397	10
2009-07-09 06:30:00	17	-10.759	X				2009-07-12 10:30:00	165	22.709	11
2009-07-09 07:00:00	16	-5.37948	0				2009-07-12 10:45:00	164	22.5397	0
2009-07-09 07:15:00	18	-16.1384	2				2009-07-12 11:30:00	164	22.5397	-1
2009-07-09 07:30:00	16	-5.37948	-1				2009-07-12 11:45:00	164	22.5397	0
2009-07-09 08:00:00	17	-10.759	1				2009-07-12 12:30:00	164	22.5397	X
2009-07-09 08:15:00	17	-10.759	-1				2009-07-12 12:45:00	164	22.5397	X
2009-07-09 08:30:00	16	-5.37948	0				2009-07-12 13:30:00	164	22.5397	0
2009-07-09 09:00:00	16	-5.37948	-1				2009-07-12 13:45:00	145	19.3945	-19
2009-07-09 09:15:00	16	-5.37948	-1				2009-07-12 14:30:00	151	20.3741	-13
2009-07-09 09:30:00	16	-5.37948	0				2009-07-12 14:45:00	161	22.0342	16
2009-07-09 10:00:00	16	-5.37948	0				2009-07-12 15:30:00	146	19.557	-5
2009-07-09 10:15:00	16	-5.37948	0				2009-07-12 15:45:00	160	21.8665	-1
2009-07-09 10:30:00	16	-5.37948	0				2009-07-12 16:30:00	160	21.8665	14
2009-07-09 11:00:00	16	-5.37948	0				2009-07-12 16:45:00	160	21.8665	0
2009-07-09 11:15:00	16	-5.37948	0				2009-07-12 17:30:00	160	21.8665	0
2009-07-09 11:30:00	17	-10.759	1				2009-07-12 17:45:00	160	21.8665	0
2009-07-09 12:00:00	16	-5.37948	X				2009-07-12 18:30:00	158	21.5323	X
2009-07-09 12:15:00	16	-5.37948	X				2009-07-12 18:45:00	160	21.8665	X
2009-07-09 12:30:00	16	-5.37948	X				2009-07-12 19:30:00	160	21.8665	2
2009-07-09 13:00:00	17	-10.759	1				2009-07-12 19:45:00	130	16.9887	-30
2009-07-09 13:15:00	17	-10.759	1				2009-07-12 20:30:00	130	16.9887	-30
2009-07-09 13:30:00	17	-10.759	1				2009-07-12 20:45:00	159	21.6992	29
2009-07-09 14:00:00	17	-10.759	0				2009-07-12 21:30:00	159	21.6992	29
2009-07-09 14:15:00	16	-5.37948	-1				2009-07-12 21:45:00	154	20.8684	-5
2009-07-09 14:30:00	17	-10.759	0				2009-07-12 22:30:00	151	20.3741	-8
2009-07-09 15:00:00	16	-5.37948	-1				2009-07-12 22:45:00	139	18.4255	-15
2009-07-09 15:15:00	17	-10.759	1				2009-07-12 23:30:00	165	22.709	14
2009-07-09 15:30:00	16	-5.37948	-1				2009-07-12 23:45:00	159	21.6992	20
2009-07-09 16:00:00	16	-5.37948	0				2009-07-13 00:30:00	161	22.0342	X
2009-07-09 16:15:00	16	-5.37948	-1				2009-07-13 01:30:00	149	20.0463	-12
2009-07-09 16:30:00	16	-5.37948	0				2009-07-13 02:30:00	154	20.8684	5
2009-07-09 17:00:00	27	-64.5538	11				2009-07-13 03:30:00	163	22.3708	9
2009-07-09 17:15:00	16	-5.37948	0				2009-07-13 04:30:00	161	22.0342	-2
2009-07-09 17:30:00	16	-5.37948	0				2009-07-13 05:30:00	158	21.5323	-3
2009-07-09 18:00:00	16	-5.37948	X				2009-07-13 06:30:00	166	22.8787	X
2009-07-09 18:15:00	16	-5.37948	X				2009-07-13 07:30:00	165	22.709	-1
2009-07-09 18:30:00	17	-10.759	X				2009-07-13 08:30:00	166	22.8787	1
2009-07-09 19:00:00	16	-5.37948	0				2009-07-13 09:30:00	163	22.3708	-3
2009-07-09 19:15:00	16	-5.37948	0				2009-07-13 10:30:00	164	22.5397	1
2009-07-09 19:30:00	16	-5.37948	-1				2009-07-13 11:30:00	166	22.8787	2
2009-07-09 20:00:00	16	-5.37948	0				2009-07-13 12:30:00	158	21.5323	X
2009-07-09 20:15:00	16	-5.37948	0				2009-07-13 13:30:00	163	22.3708	5
2009-07-09 20:30:00	16	-5.37948	0				2009-07-13 14:30:00	157	21.3657	-6
2009-07-09 21:00:00	16	-5.37948	0				2009-07-13 15:30:00	164	22.5397	7
2009-07-09 21:15:00	16	-5.37948	0				2009-07-13 16:30:00	166	22.8787	2
2009-07-09 21:30:00	21	-32.2769	5				2009-07-13 17:30:00	167	23.0489	1
2009-07-09 22:00:00	16	-5.37948	0				2009-07-13 18:30:00	162	22.2023	X
2009-07-09 22:15:00	25	-53.7948	9				2009-07-13 19:30:00	161	22.0342	-1
2009-07-09 22:30:00	17	-10.759	-4				2009-07-13 20:30:00	162	22.2023	1
2009-07-09 23:00:00	16	-5.37948	0				2009-07-13 21:30:00	161	22.0342	-1
2009-07-09 23:15:00	16	-5.37948	-9				2009-07-13 22:30:00	163	22.3708	2
2009-07-09 23:30:00	16	-5.37948	-1				2009-07-13 23:30:00	136	17.9445	-27
2009-07-11	16	-5.37948	X				2009-07-14 00:15:00	165	22.709	X
2009-07-11 00:15:00	16	-5.37948	X				2009-07-14 01:15:00	163	22.3708	-2
2009-07-11 01:00:00	16	-5.37948	0				2009-07-14 02:15:00	158	21.5323	-5
2009-07-11 01:15:00	16	-5.37948	0				2009-07-14 03:15:00	148	19.8829	-10
2009-07-11 02:00:00	16	-5.37948	0				2009-07-14 04:15:00	163	22.3708	15
2009-07-11 02:15:00	21	-32.2769	5				2009-07-14 05:15:00	152	20.5385	-11
2009-07-11 03:00:00	16	-5.37948	0				2009-07-14 06:15:00	142	18.9088	X
2009-07-11 03:15:00	21	-32.2769	0				2009-07-14 07:15:00	148	19.8829	6
2009-07-11 04:00:00	19	-21.5179	3				2009-07-14 08:15:00	156	21.1996	8
2009-07-11 04:15:00	17	-10.759	-4				2009-07-14 09:15:00	160	21.8665	4
2009-07-11 05:00:00	20	-26.8974	1				2009-07-14 10:15:00	160	21.8665	0
2009-07-11 05:15:00	17	-10.759	0				2009-07-14 11:15:00	158	21.5323	-2
2009-07-11 06:00:00	17	-10.759	X				2009-07-14 12:15:00	162	22.2023	X
2009-07-11 06:15:00	19	-21.5179	X				2009-07-14 13:15:00	163	22.3708	1
2009-07-11 07:00:00	20	-26.8974	3				2009-07-14 14:15:00	163	22.3708	0
2009-07-11 07:15:00	19	-21.5179	0				2009-07-14 15:15:00	161	22.0342	-2
2009-07-11 08:00:00	19	-21.5179	-1				2009-07-14 16:15:00	165	22.709	4
2009-07-11 08:15:00	19	-21.5179	0				2009-07-14 17:15:00	164	22.5397	-1
2009-07-11 09:00:00	19	-21.5179	0				2009-07-14 18:15:00	164	22.5397	X
2009-07-11 09:15:00	18	-16.1384	-1				2009-07-14 19:15:00	160	21.8665	-4
2009-07-11 10:00:00	19	-21.5179	0				2009-07-14 20:15:00	164	22.5397	4
2009-07-11 10:15:00	18	-16.1384	0				2009-07-14 21:15:00	160	21.8665	-4
2009-07-11 11:00:00	17	-10.759	-2				2009-07-14 22:15:00	128	16.6718	-32		16.6718
2009-07-11 11:15:00	21	-32.2769	3				2009-07-14 23:15:00	159	21.6992	31	21.6992
2009-07-11 12:00:00	20	-26.8974	X				2009-07-15 00:15:00	138	18.2649	X
2009-07-11 12:15:00	20	-26.8974	X				2009-07-15 01:15:00	162	22.2023	24
2009-07-11 13:00:00	18	-16.1384	-2				2009-07-15 02:15:00	146	19.557	-16
2009-07-11 13:15:00	17	-10.759	-3				2009-07-15 03:15:00	142	18.9088	-4
2009-07-11 14:00:00	19	-21.5179	1				2009-07-15 04:15:00	140	18.5863	-2
2009-07-11 14:15:00	17	-10.759	0				2009-07-15 05:15:00	150	20.2101	10
2009-07-11 15:00:00	18	-16.1384	-1				2009-07-15 06:15:00	167	23.0489	X
2009-07-11 15:15:00	17	-10.759	0				2009-07-15 07:15:00	166	22.8787	-1
2009-07-11 16:00:00	17	-10.759	-1				2009-07-15 08:15:00	167	23.0489	1
2009-07-11 16:15:00	17	-10.759	0				2009-07-15 09:15:00	167	23.0489	0
2009-07-11 17:00:00	17	-10.759	0				2009-07-15 10:15:00	167	23.0489	0
2009-07-11 17:15:00	25	-53.7948	8				2009-07-15 11:15:00	166	22.8787	-1
2009-07-11 18:00:00	17	-10.759	X				2009-07-15 12:15:00	156	21.1996	X
2009-07-11 18:15:00	18	-16.1384	X				2009-07-15 13:15:00	167	23.0489	11
2009-07-11 19:00:00	16	-5.37948	-1				2009-07-15 14:15:00	167	23.0489	0
2009-07-11 19:15:00	16	-5.37948	-2				2009-07-15 15:15:00	164	22.5397	-3
2009-07-11 20:00:00	16	-5.37948	0				2009-07-15 16:15:00	163	22.3708	-1
2009-07-11 20:15:00	16	-5.37948	0				2009-07-15 17:15:00	161	22.0342	-2
2009-07-11 21:00:00	16	-5.37948	0				2009-07-15 18:15:00	164	22.5397	X
2009-07-11 21:15:00	25	-53.7948	9				2009-07-15 19:15:00	163	22.3708	-1
2009-07-11 22:00:00	16	-5.37948	0				2009-07-15 20:15:00	167	23.0489	4
2009-07-11 22:15:00	20	-26.8974	-5				2009-07-15 21:15:00	135	17.7847	-32		17.7847
2009-07-11 23:00:00	17	-10.759	1				2009-07-15 22:15:00	166	22.8787	31	22.8787
2009-07-11 23:15:00	16	-5.37948	-4				2009-07-15 23:15:00	166	22.8787	0
2009-07-12 00:45:00	18	-16.1384	X				2009-07-17	158	21.5323	X
2009-07-12 01:45:00	21	-32.2769	3				2009-07-17 00:30:00	159	21.6992	X
2009-07-12 02:45:00	16	-5.37948	-5				2009-07-17 01:00:00	160	21.8665	2
2009-07-12 03:45:00	18	-16.1384	2				2009-07-17 01:30:00	159	21.6992	0
2009-07-12 04:45:00	19	-21.5179	1				2009-07-17 02:00:00	159	21.6992	-1
2009-07-12 05:45:00	19	-21.5179	0				2009-07-17 02:30:00	159	21.6992	0
2009-07-12 06:45:00	17	-10.759	X				2009-07-17 03:00:00	159	21.6992	0
2009-07-12 07:45:00	20	-26.8974	3				2009-07-17 03:30:00	158	21.5323	-1
2009-07-12 08:45:00	17	-10.759	-3				2009-07-17 04:00:00	159	21.6992	0
2009-07-12 09:45:00	16	-5.37948	-1				2009-07-17 04:30:00	158	21.5323	0
2009-07-12 10:45:00	17	-10.759	1				2009-07-17 05:00:00	158	21.5323	-1
2009-07-12 11:45:00	17	-10.759	0				2009-07-17 05:30:00	163	22.3708	5
2009-07-12 12:45:00	17	-10.759	X				2009-07-17 06:00:00	156	21.1996	X
2009-07-12 13:45:00	18	-16.1384	1				2009-07-17 06:30:00	160	21.8665	X
2009-07-12 14:45:00	17	-10.759	-1				2009-07-17 07:00:00	157	21.3657	1
2009-07-12 15:45:00	17	-10.759	0				2009-07-17 07:30:00	156	21.1996	-4
2009-07-12 16:45:00	16	-5.37948	-1				2009-07-17 08:00:00	155	21.0338	-2
2009-07-12 17:45:00	16	-5.37948	0				2009-07-17 08:30:00	156	21.1996	0
2009-07-12 18:45:00	16	-5.37948	X				2009-07-17 09:00:00	159	21.6992	4
2009-07-12 19:45:00	21	-32.2769	5				2009-07-17 09:30:00	161	22.0342	5
2009-07-12 20:45:00	16	-5.37948	-5				2009-07-17 10:00:00	160	21.8665	1
2009-07-12 21:45:00	16	-5.37948	0				2009-07-17 10:30:00	160	21.8665	-1
2009-07-12 22:45:00	17	-10.759	1				2009-07-17 11:00:00	160	21.8665	0
2009-07-12 23:45:00	16	-5.37948	-1				2009-07-17 11:30:00	153	20.7033	-7
2009-07-13 00:15:00	16	-5.37948	X				2009-07-17 12:00:00	160	21.8665	X
2009-07-13 00:45:00	22	-37.6564	X				2009-07-17 12:30:00	160	21.8665	X
2009-07-13 01:15:00	17	-10.759	1				2009-07-17 13:00:00	161	22.0342	1
2009-07-13 01:45:00	16	-5.37948	-6				2009-07-17 13:30:00	160	21.8665	0
2009-07-13 02:15:00	21	-32.2769	4				2009-07-17 14:00:00	161	22.0342	0
2009-07-13 02:45:00	16	-5.37948	0				2009-07-17 14:30:00	161	22.0342	1
2009-07-13 03:15:00	18	-16.1384	-3				2009-07-17 15:00:00	162	22.2023	1
2009-07-13 03:45:00	17	-10.759	1				2009-07-17 15:30:00	162	22.2023	1
2009-07-13 04:15:00	17	-10.759	-1				2009-07-17 16:00:00	161	22.0342	-1
2009-07-13 04:45:00	17	-10.759	0				2009-07-17 16:30:00	163	22.3708	1
2009-07-13 05:15:00	18	-16.1384	1				2009-07-17 17:00:00	163	22.3708	2
2009-07-13 05:45:00	18	-16.1384	1				2009-07-17 17:30:00	164	22.5397	1
2009-07-13 06:15:00	18	-16.1384	X				2009-07-17 18:00:00	164	22.5397	X
2009-07-13 06:45:00	16	-5.37948	X				2009-07-17 18:30:00	164	22.5397	X
2009-07-13 07:15:00	16	-5.37948	-2				2009-07-17 19:00:00	164	22.5397	0
2009-07-13 07:45:00	16	-5.37948	0				2009-07-17 19:30:00	165	22.709	1
2009-07-13 08:15:00	17	-10.759	1				2009-07-17 20:00:00	162	22.2023	-2
[truncated: 2,503 more rows]

## Sheet: WS4
Archival Data							Archival Data							Latitude and Longitude for Tag 88692
[truncated: 2,125 more rows]

[truncated: 4 more sheets: WS5, WS6, WS7, WS8]
