# Supplementary material for: Oceanic adults, coastal juveniles: tracking the habitat use of whale sharks off the Pacific coast of Mexico
Source: PubMed Central journal article supplement (PMC5420197; doi:10.7717/peerj.3271), 2017-05-04
Supplement: peerj-05-3271-s001.pdf [file peerj-05-3271-s001.pdf]

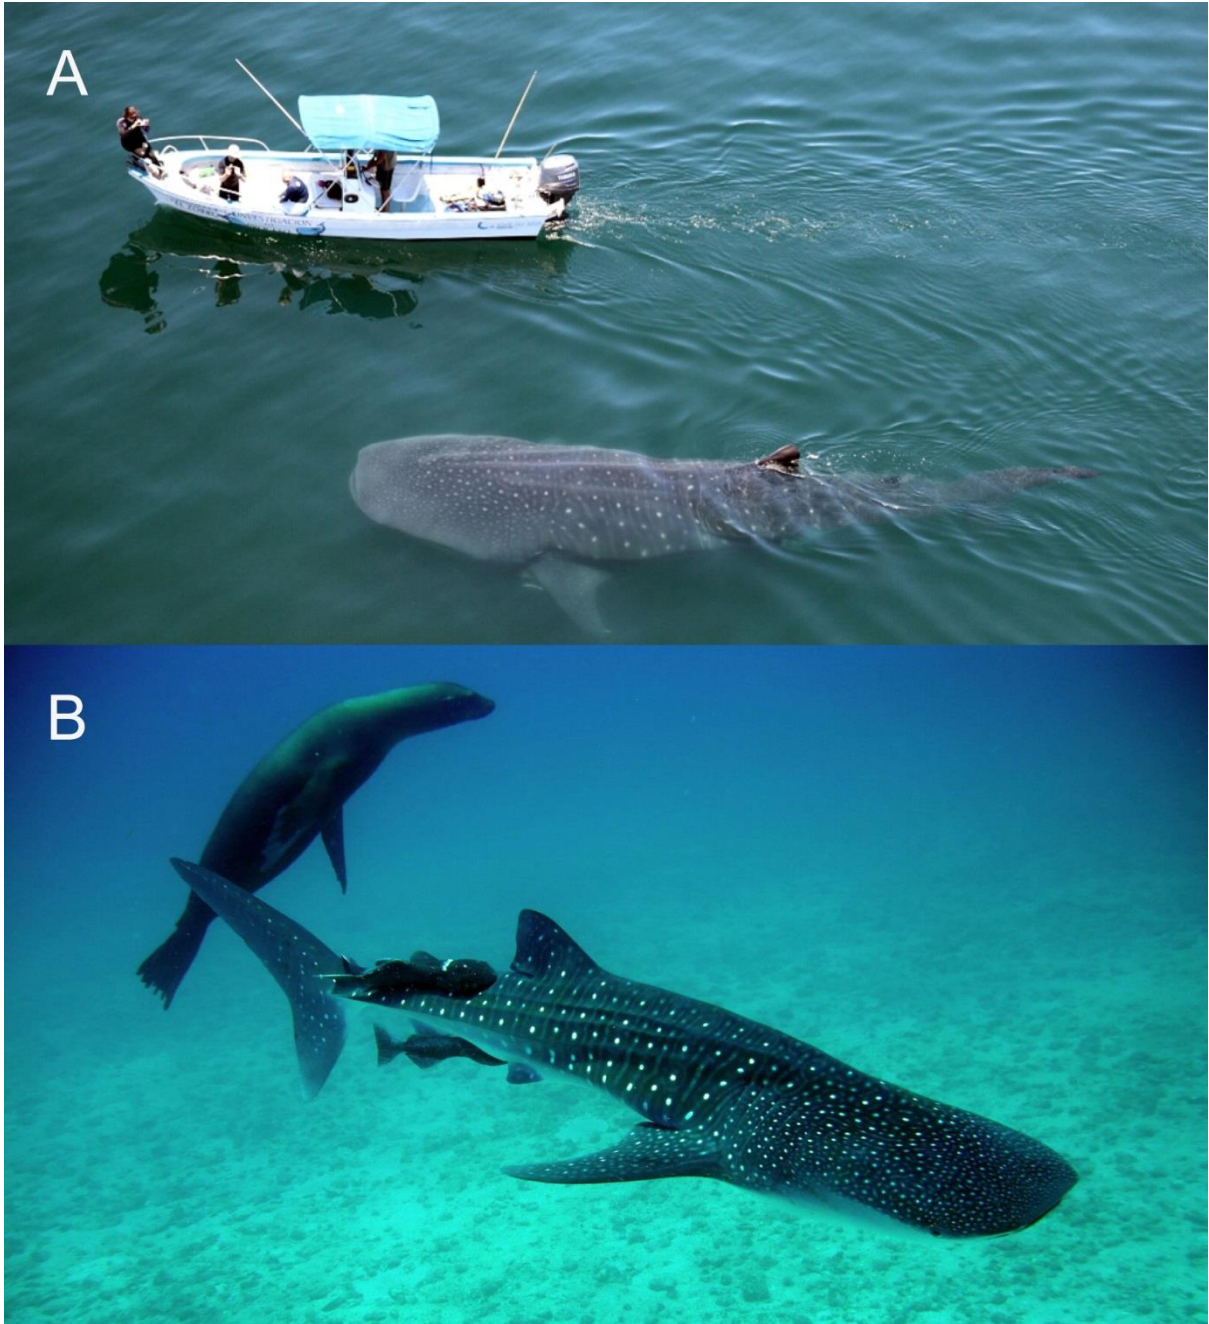

**Figure S1** (A) Adult female whale shark WS7 photographed on the day of tagging at Espiritu Santo Island (Table 1, Fig. 1A); (B) whale shark pup sighted at Espiritu Santo Island on 4 July 2015. Photographs copyright Carlos Aguilera Carderón (A) and Jose Maria Urbalejo Calvillo (B).
