# Supplementary material for: Oceanic adults, coastal juveniles: tracking the habitat use of whale sharks off the Pacific coast of Mexico
Source: PubMed Central journal article supplement (PMC5420197; doi:10.7717/peerj.3271), 2017-05-04
Supplement: peerj-05-3271-s003.pdf [file peerj-05-3271-s003.pdf]

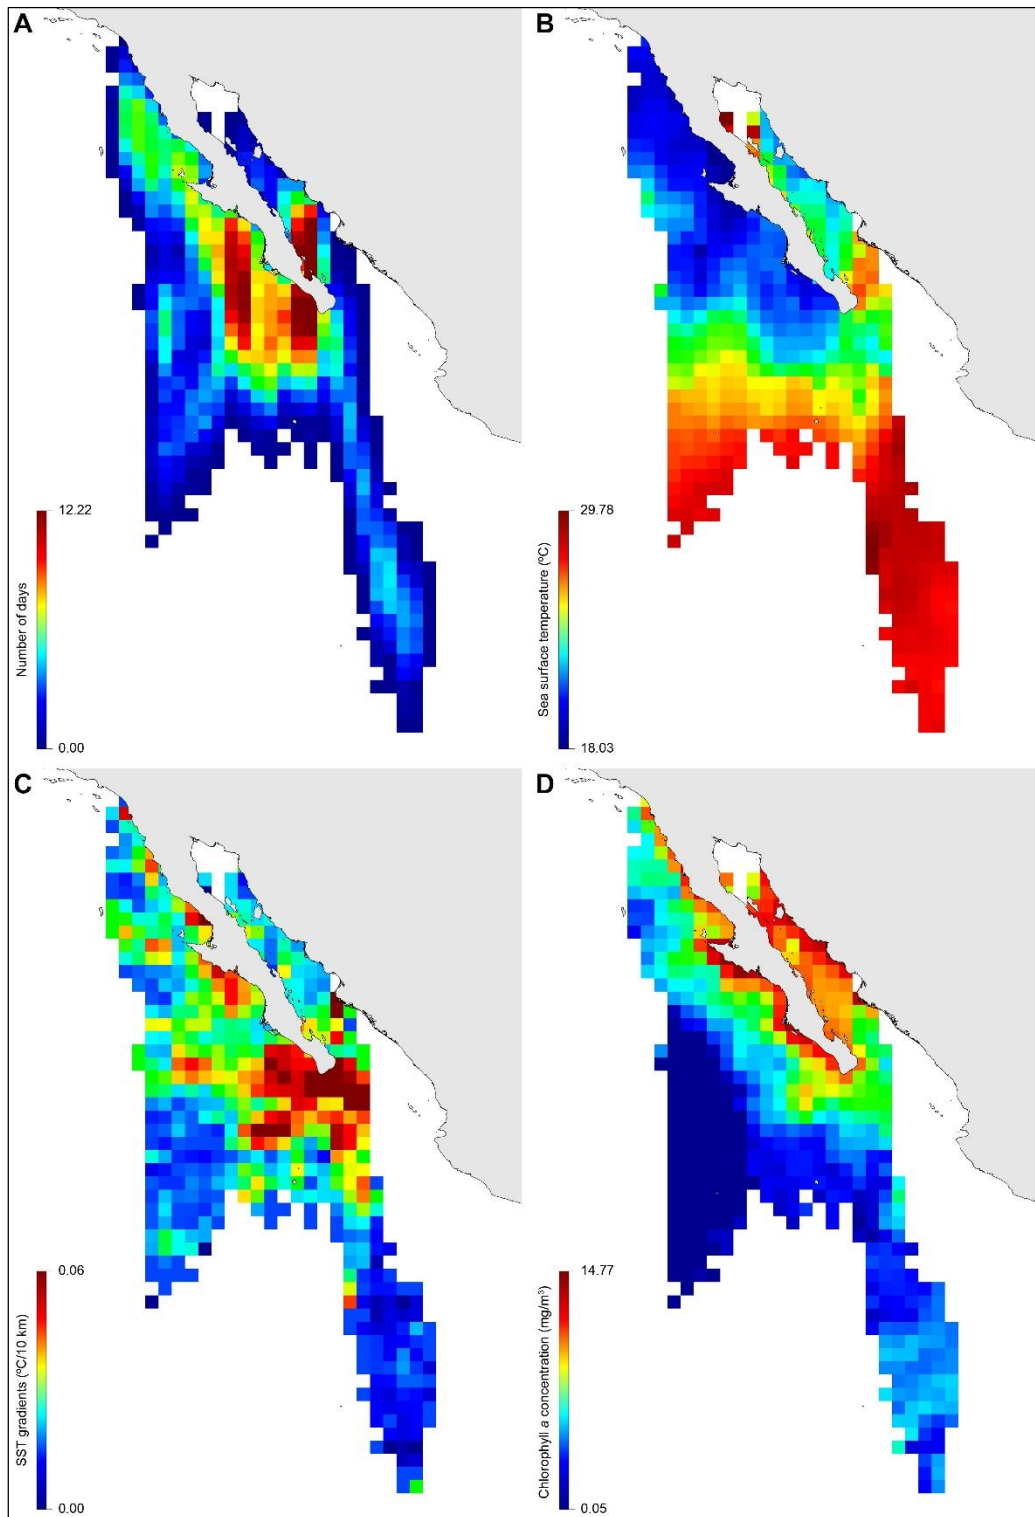

**Figure S3** Averaged (0.5° grid) point density data (A) and environmental data (B-D); B – sea surface temperature (°C); C – sea surface temperature gradients (°C/10 km); D – chlorophyll *a* concentration. Note: these were the input data for the GLMM model.
