# Supplementary material for: Oceanic adults, coastal juveniles: tracking the habitat use of whale sharks off the Pacific coast of Mexico
Source: PeerJ journal article supplement (doi:10.7717/peerj.3271), 2017-05-04
Supplement: Supplemental_Figure_2.pdf [file Supplemental_Figure_2.pdf]

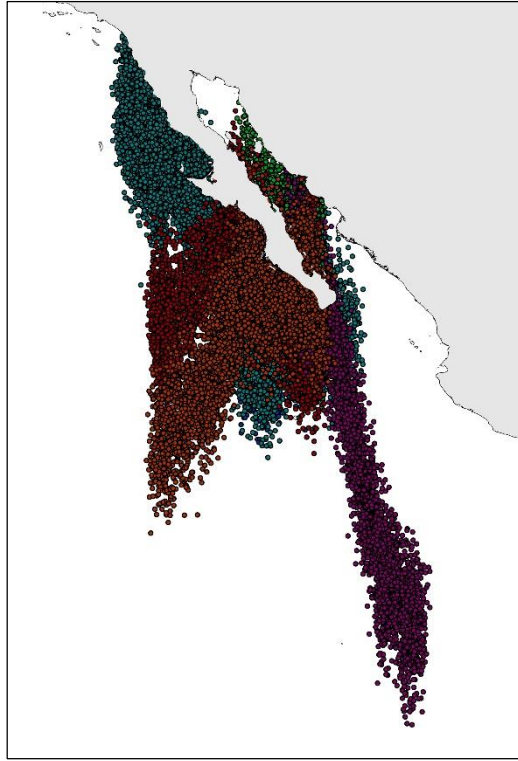

**Figure S2** Resampled locations (point density data) along previously reported tag-specific longitudinal
